# Supplementary material for: The Causal Relationships between Lipids related Traits and Atrial Fibrillation/Flutter: Two-sample Mendelian Randomization Analysis
Source: Research Square preprint supplement (doi:10.21203/rs.3.rs-6624447/v1), 2025-05-16

Supplementary materials

Figure S1 Scatter plot of MR effect size for causal associations between lipid traits and atrial fibrillation

1) Cholesterol to total lipids ratio in medium VLDL and AF

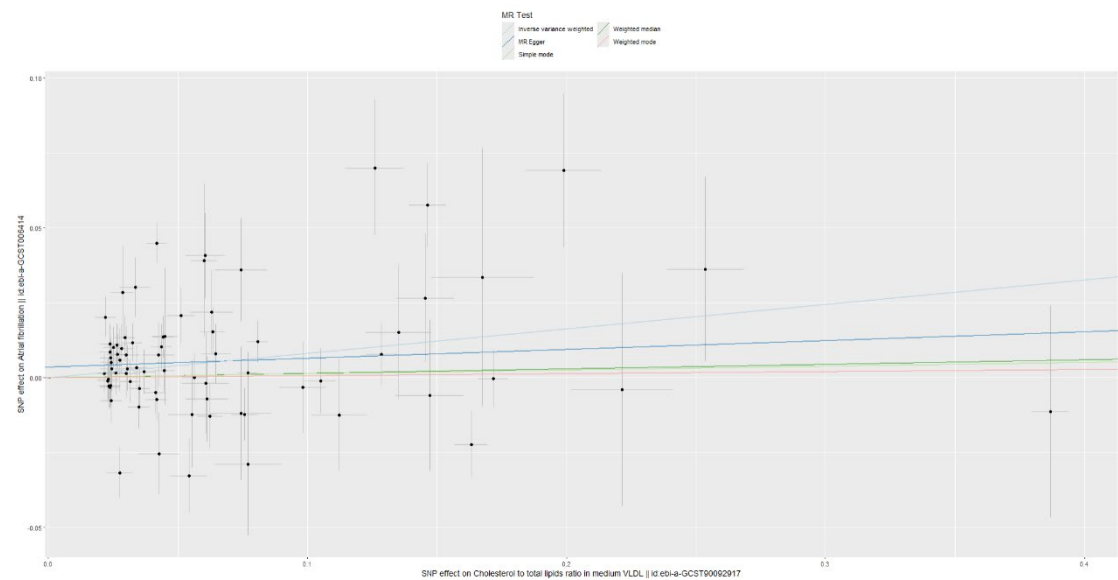

2) Cholesterol to total lipids ratio in small VLDL and AF

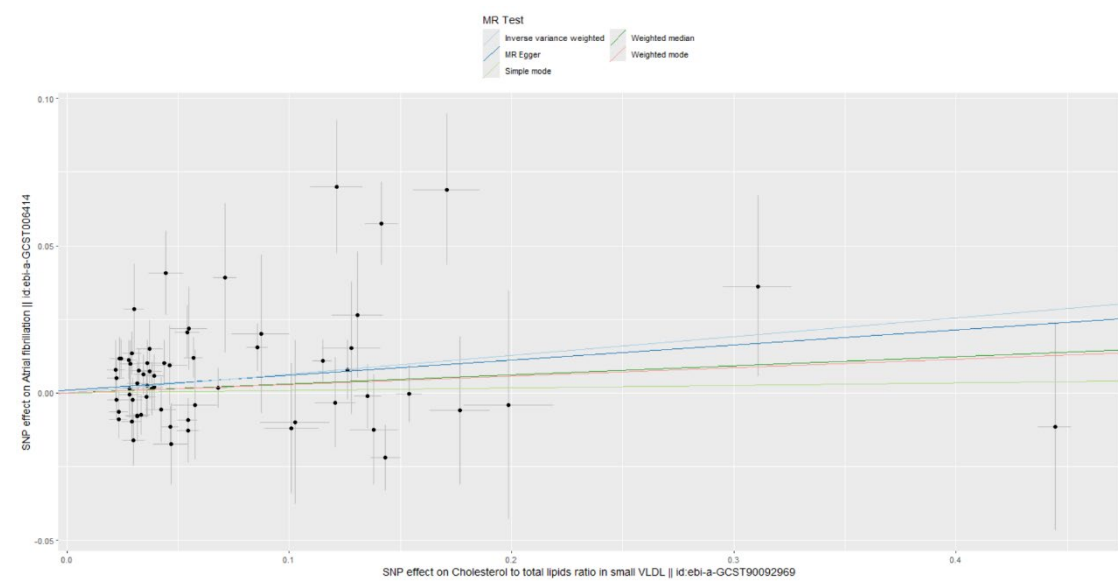

### 3) Cholesterol to total lipids ratio in large VLDL and AF

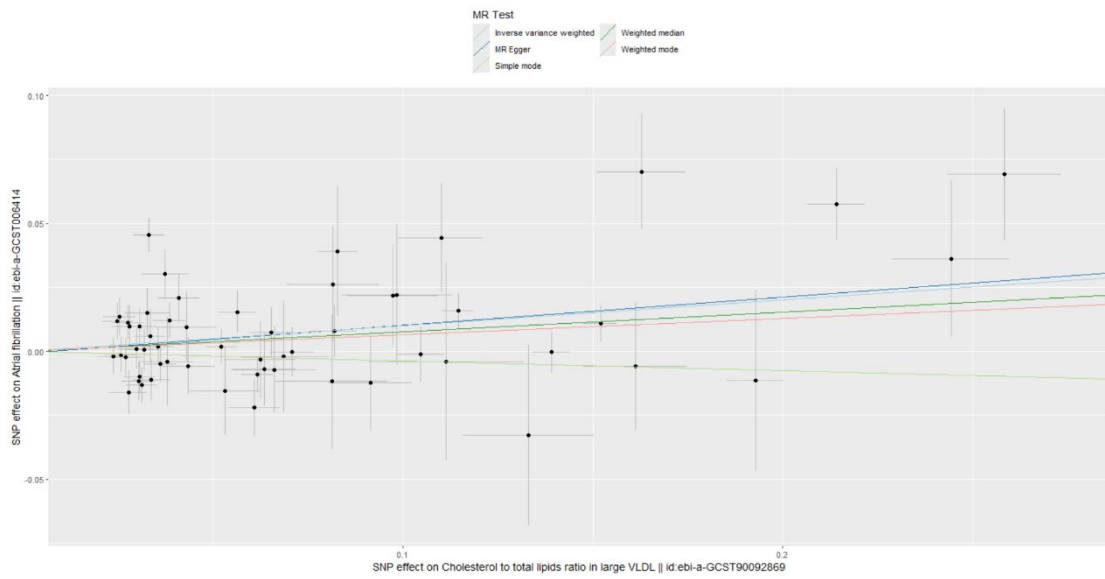

### 4) Cholesterol to total lipids ratio in very large VLDL and AF

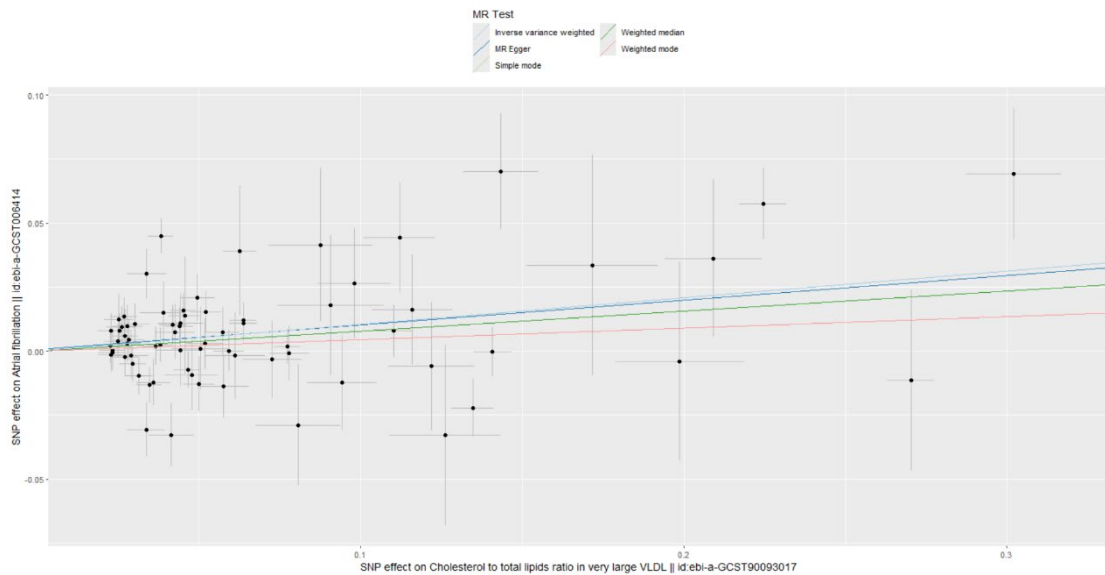

## 5) Cholesterol to total lipids ratio in chylomicrons and extremely large VLDL and AF

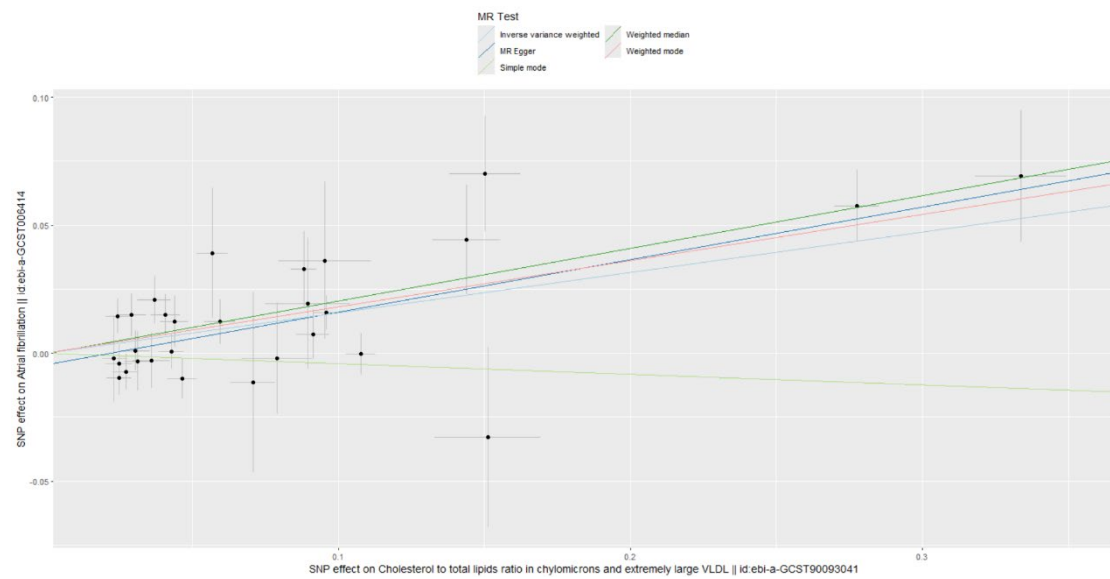

## 6) Cholesterol levels in very small VLDL and AF

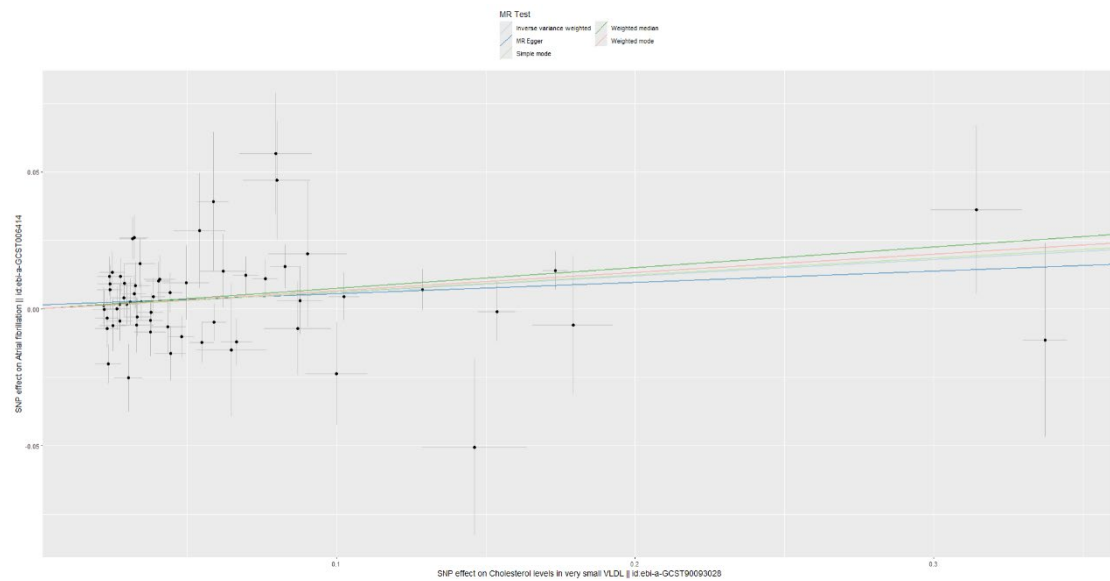

7) Cholesteryl esters to total lipids ratio in medium VLDL and AF

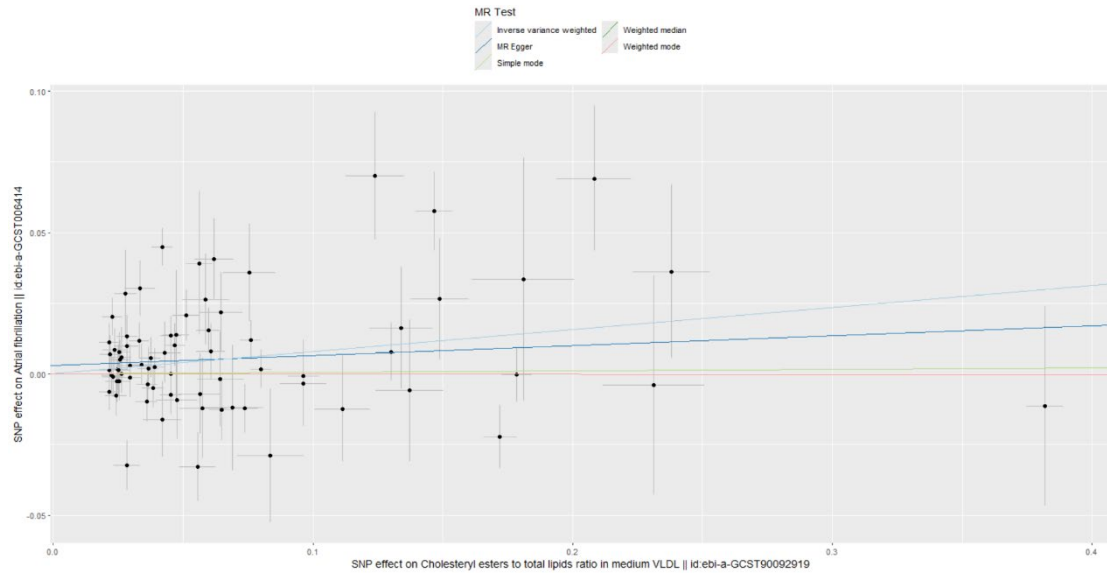

8) Cholesteryl esters to total lipids ratio in small VLDL and AF

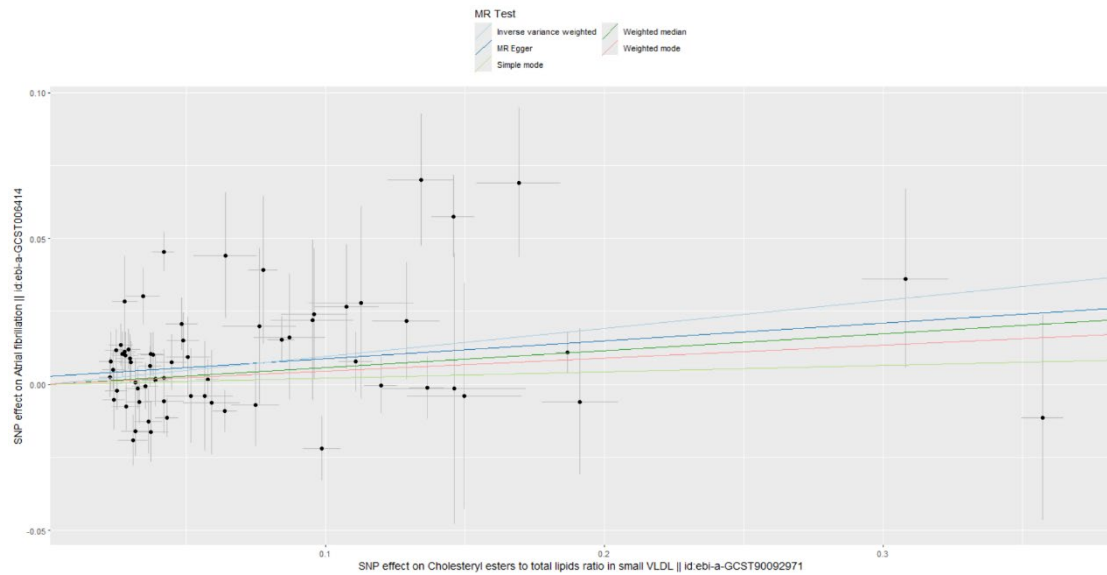

## 9) Cholesteryl esters to total lipids ratio in large VLDL and AF

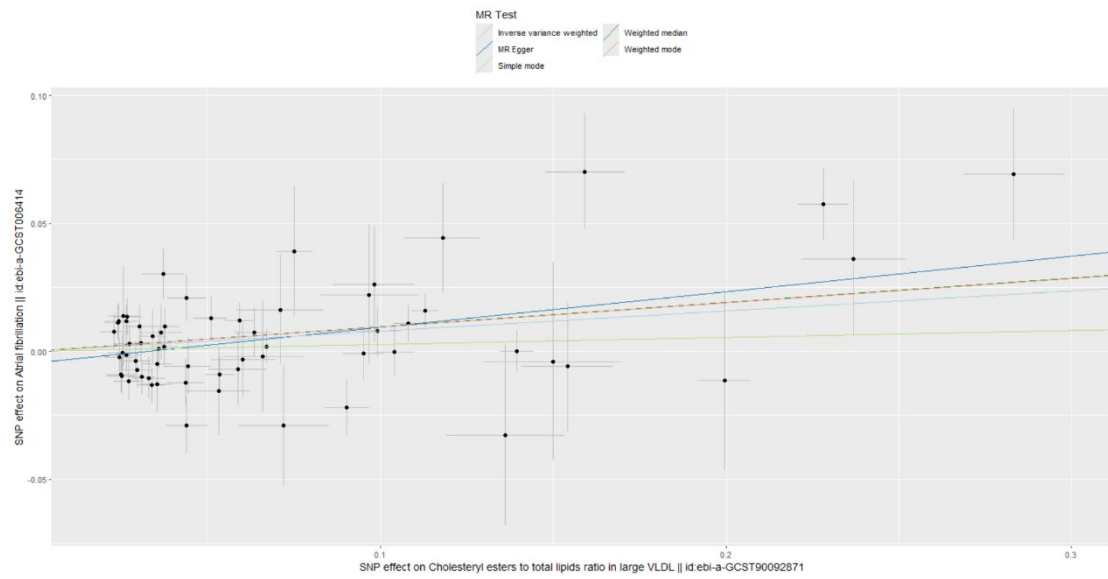

## 10) Cholesteryl esters to total lipids ratio in very large VLDL and AF

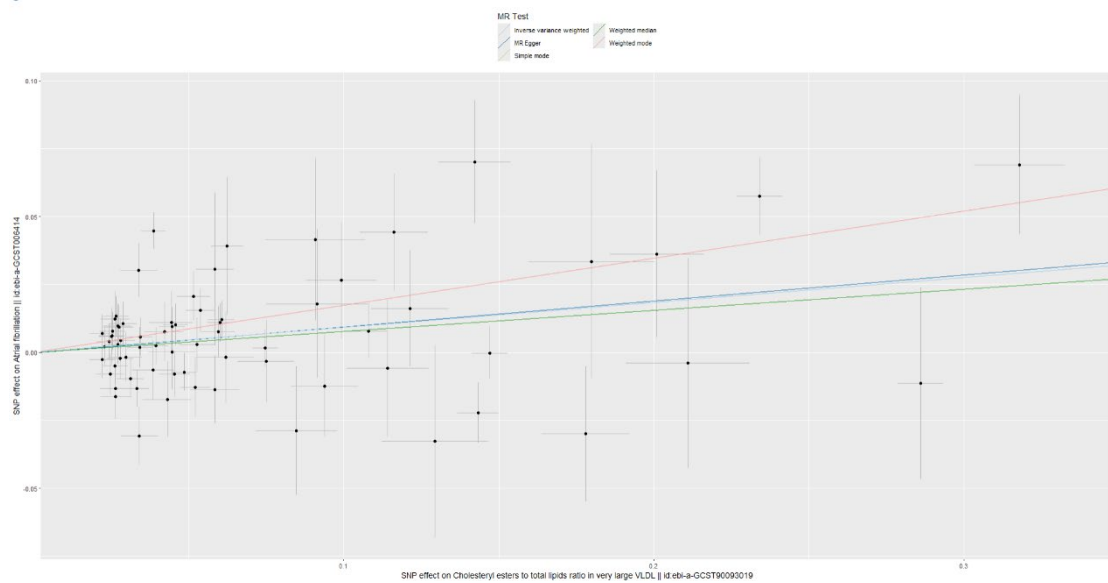

## 11) Cholesteryl esters to total lipids ratio in chylomicrons and extremely large VLDL and AF

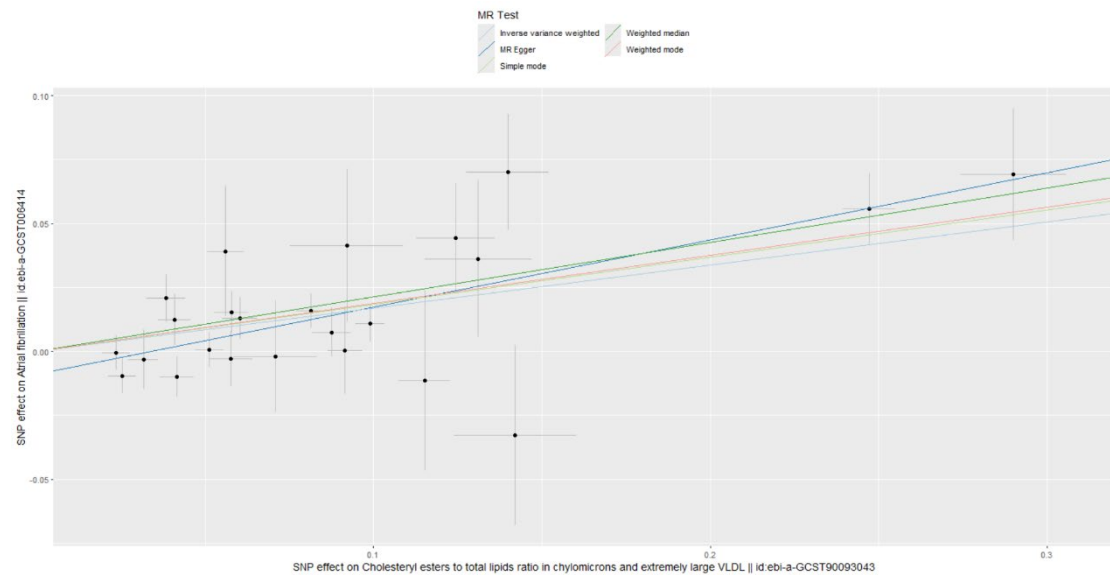

## 12) Cholesteryl esters in very small VLDL and AF

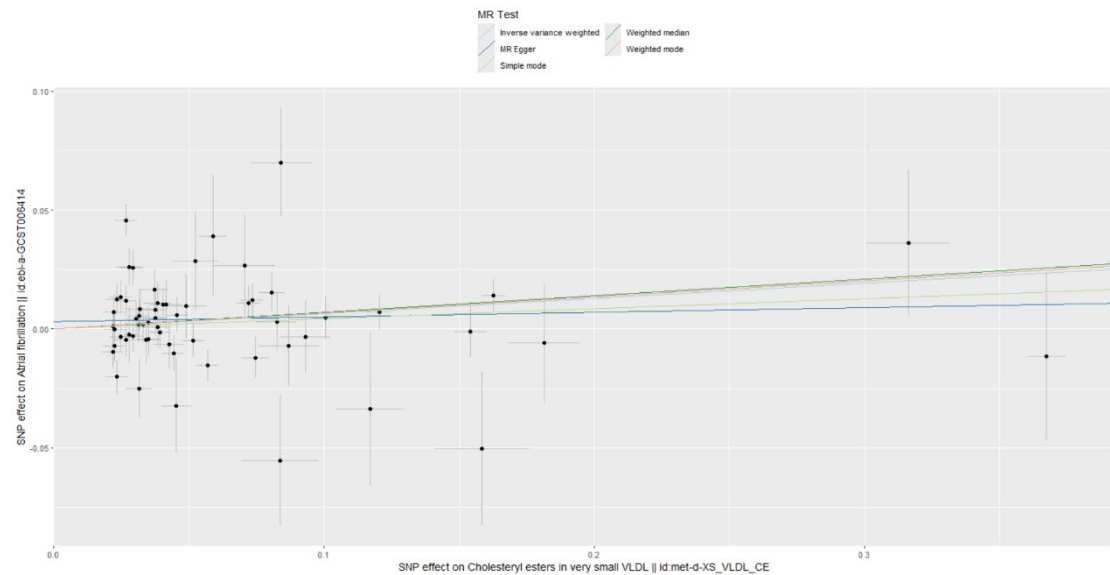

### 13) Free cholesterol to total lipids ratio in medium VLDL and AF

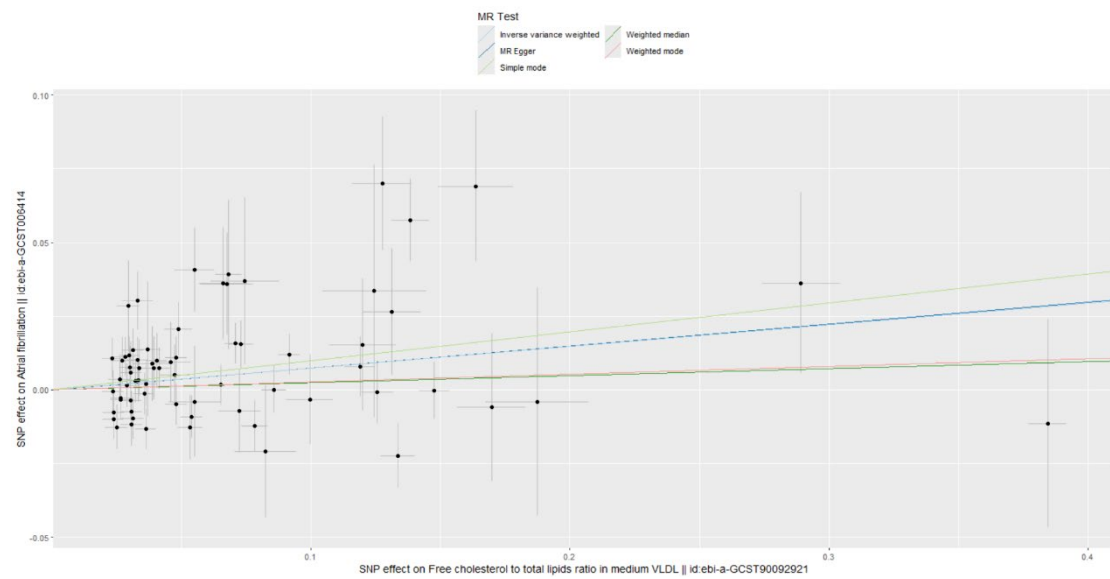

### 14) Free cholesterol to total lipids ratio in large VLDL and AF

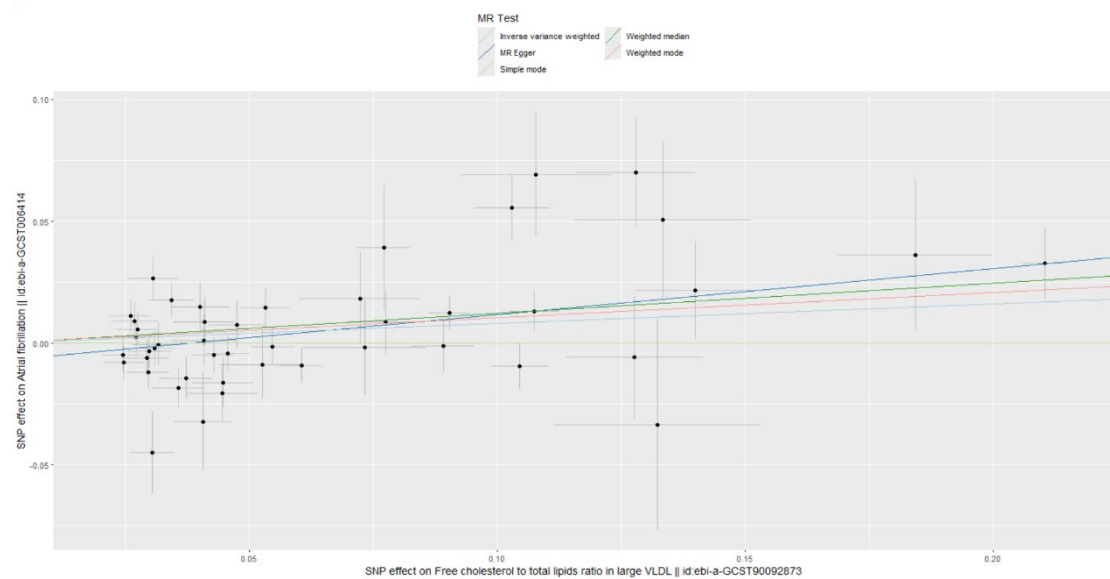

# 15) Free cholesterol to total lipids ratio in very large VLDL and AF

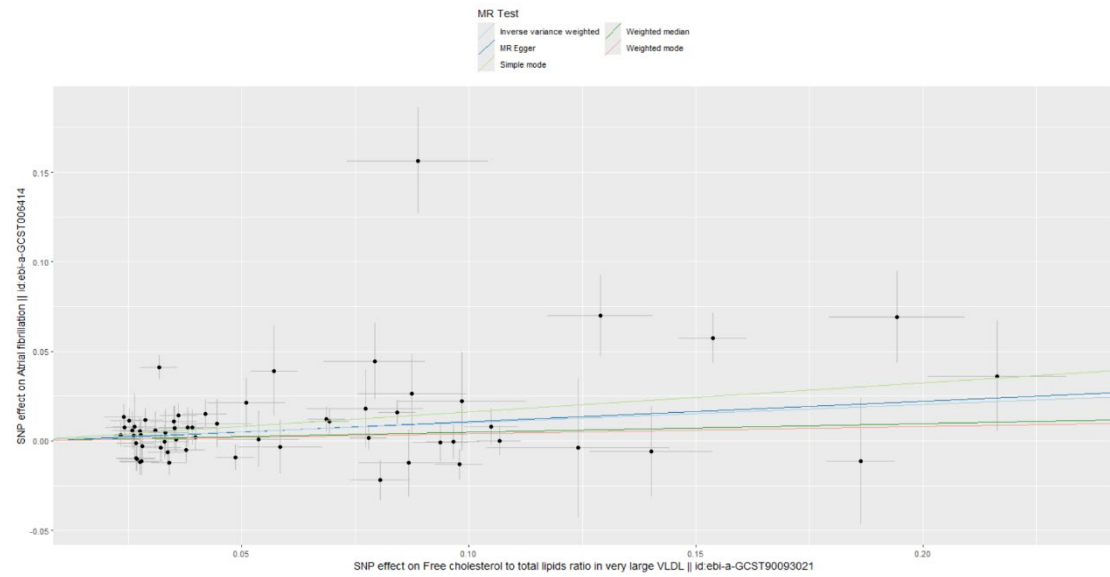

# 16) Free cholesterol to total lipids ratio in chylomicrons and extremely large VLDL and AF

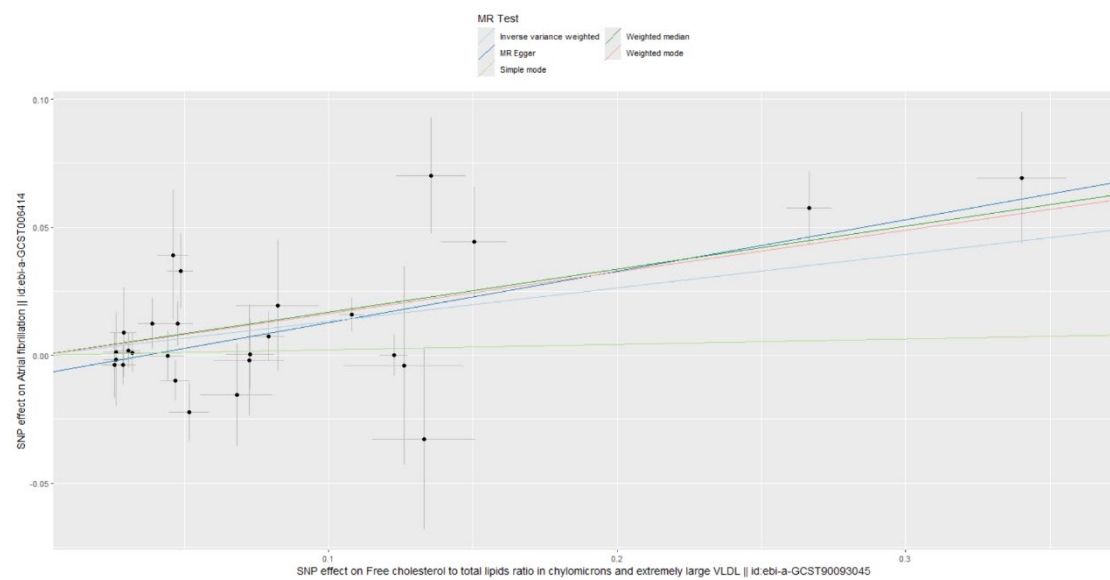

### 17) Free cholesterol levels in very small VLDL and AF

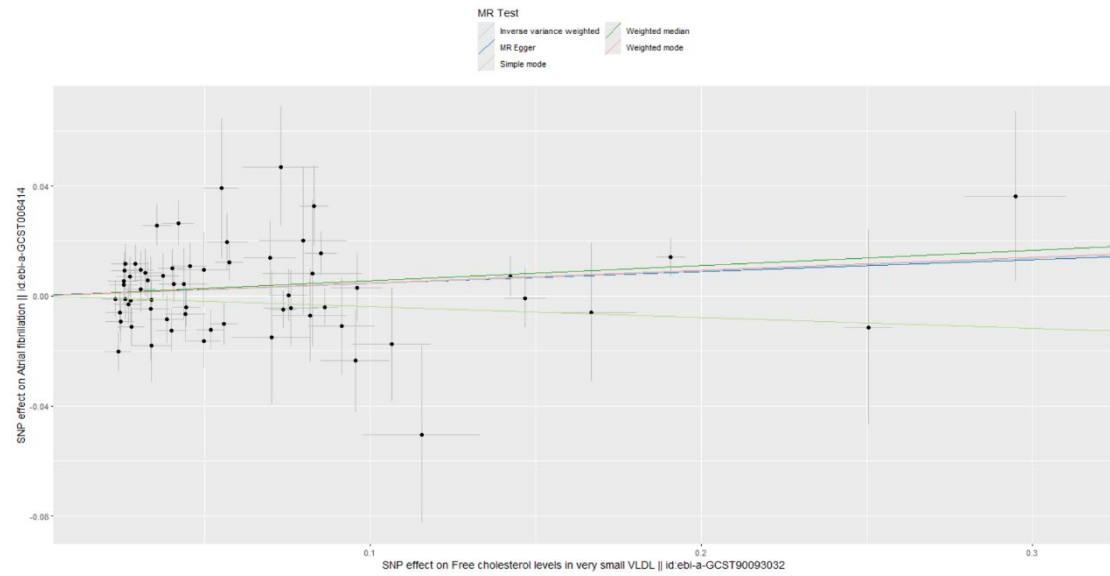

### 18) Phospholipids to total lipids ratio in medium VLDL and AF

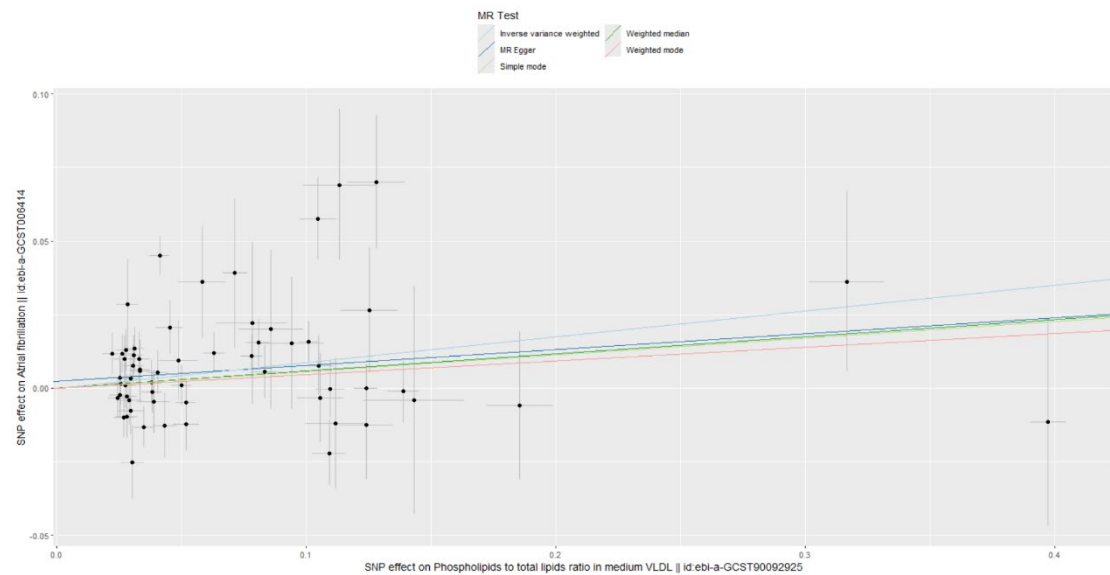

## 19) Phospholipids to total lipids ratio in chylomicrons and extremely large VLDL and AF

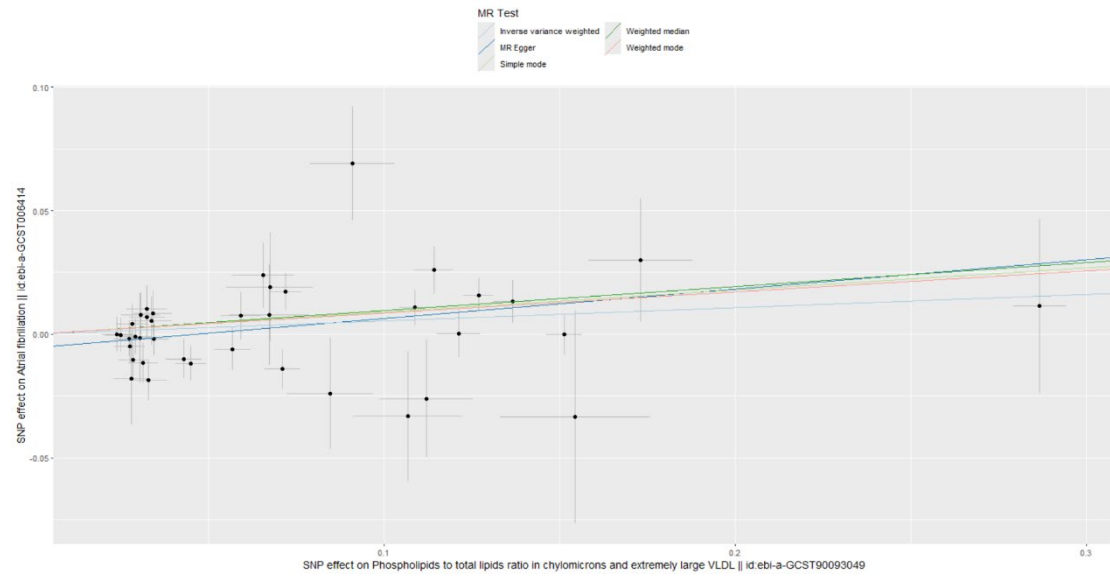

## 20) Phospholipids in IDL and AF

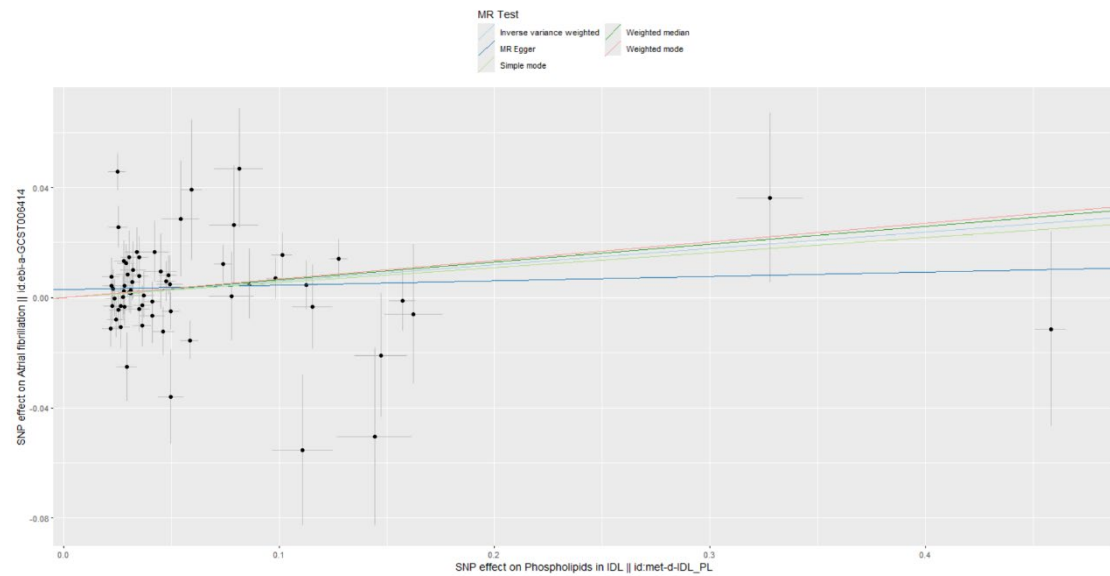

## 21) Triglycerides to total lipids ratio in medium VLDL and AF

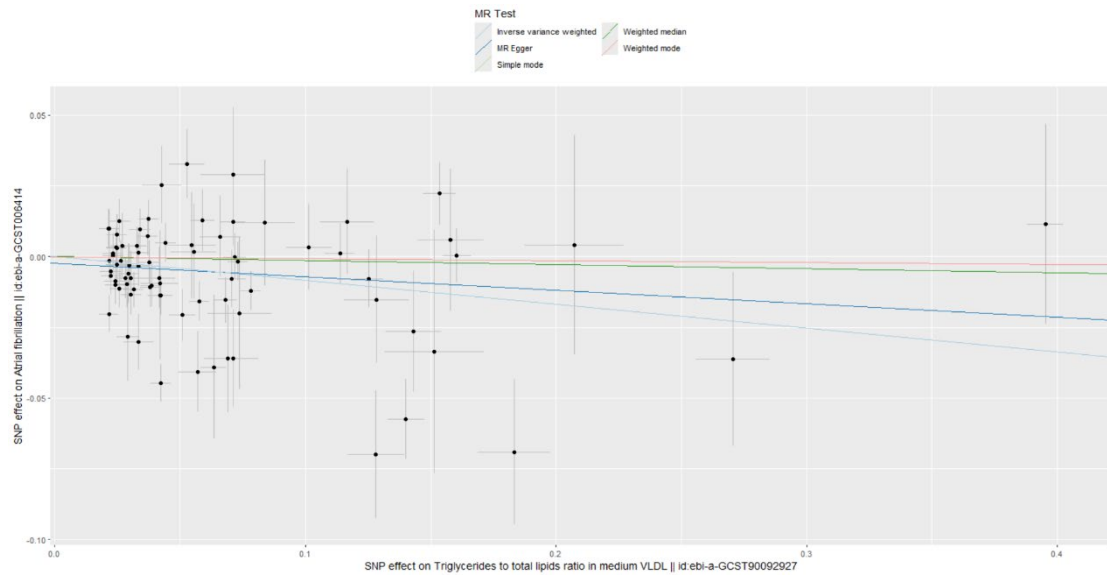

## 22) Triglycerides to total lipids ratio in small VLDL and AF

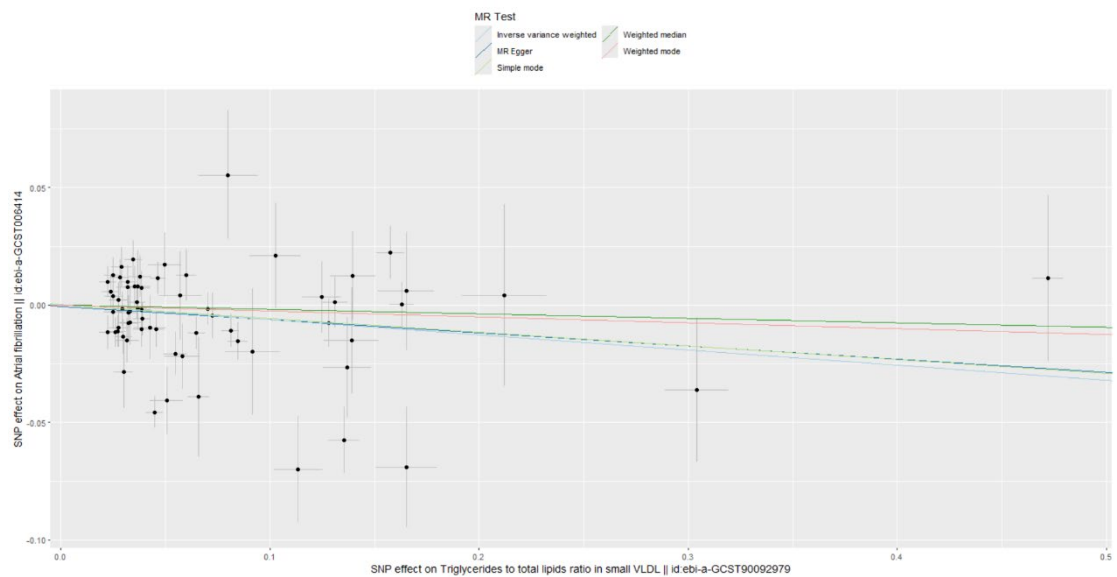

### 23) Triglycerides to total lipids ratio in large VLDL and AF

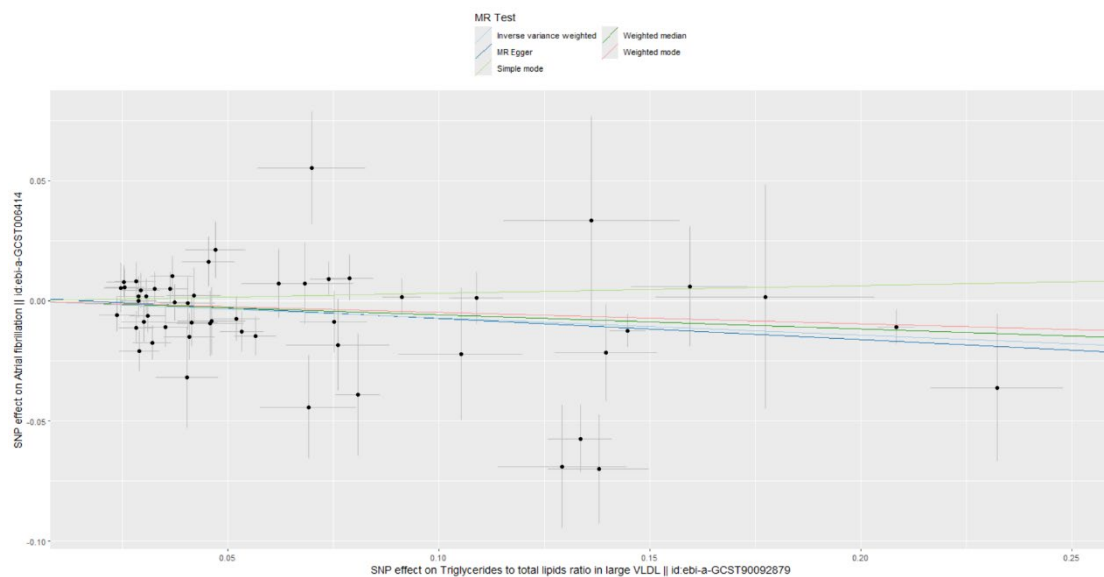

### 24) Triglycerides to total lipids ratio in very large VLDL and AF

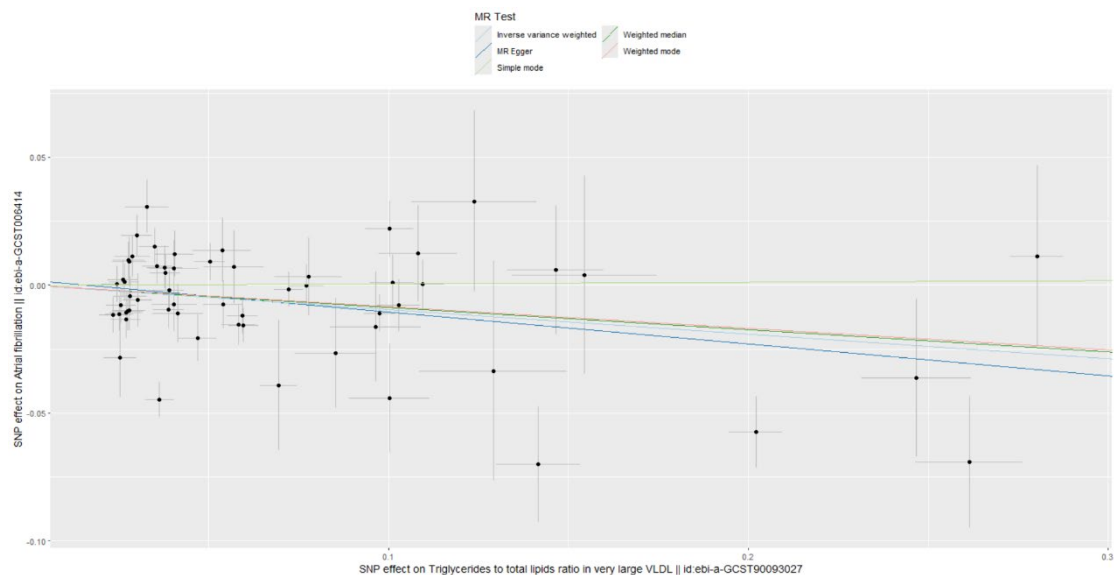

## 25) Triglycerides in chylomicrons and extremely large VLDL and AF

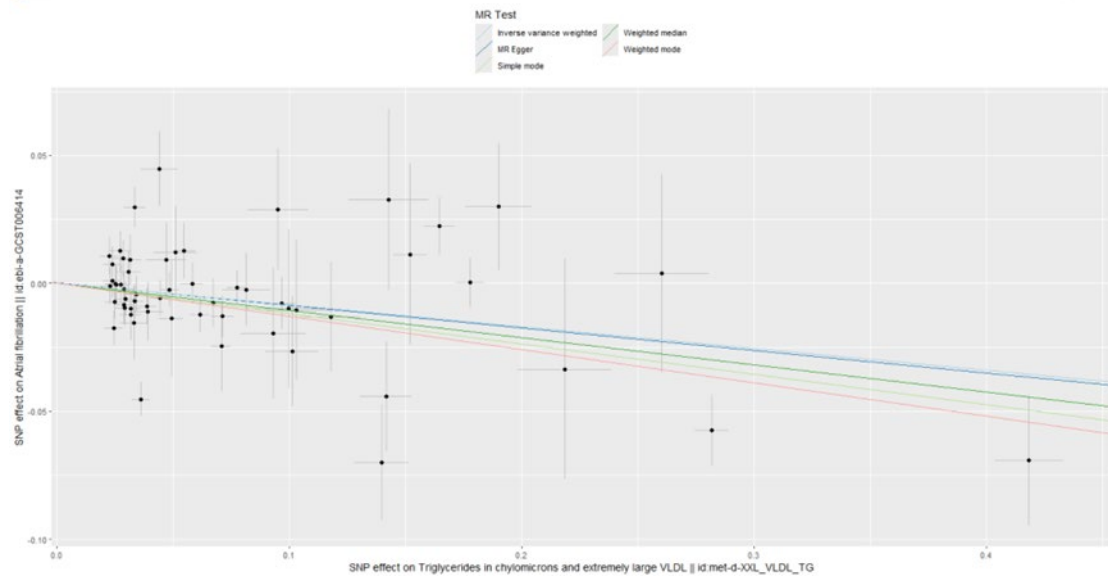

## 26) Ratio of monounsaturated fatty acids to total fatty acids and AF

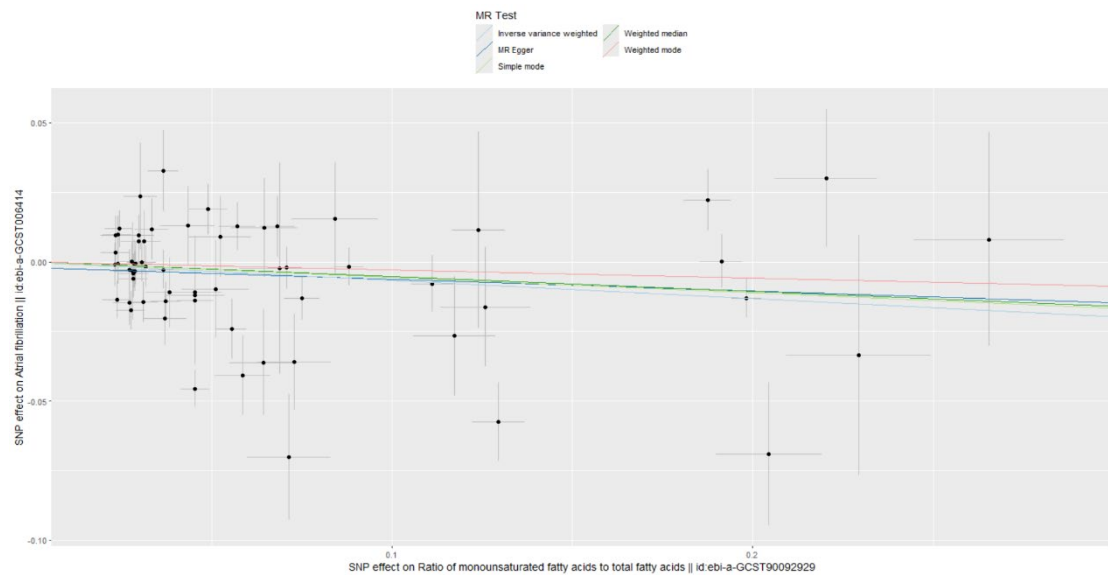

## 27) Average diameter for VLDL particles and AF

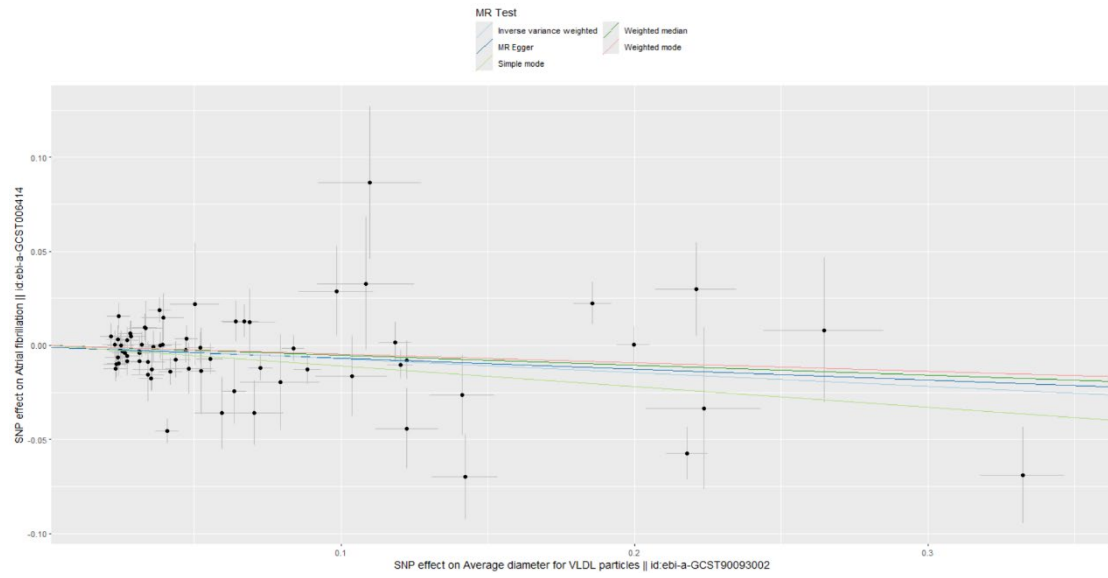

## 28) Concentration of IDL particles and AF

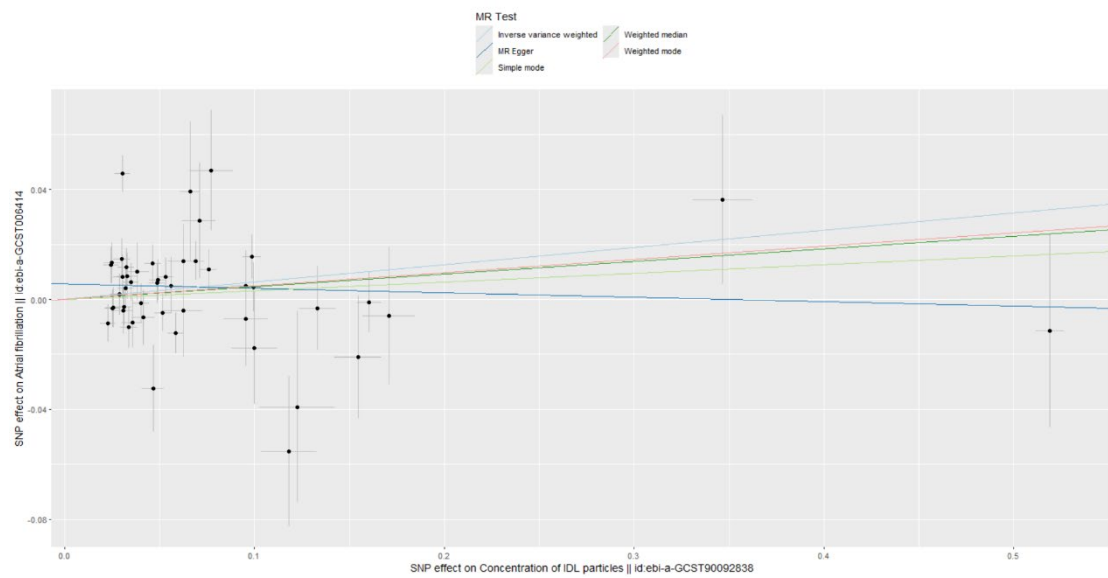

## 29) Concentration of very small VLDL particles and AF

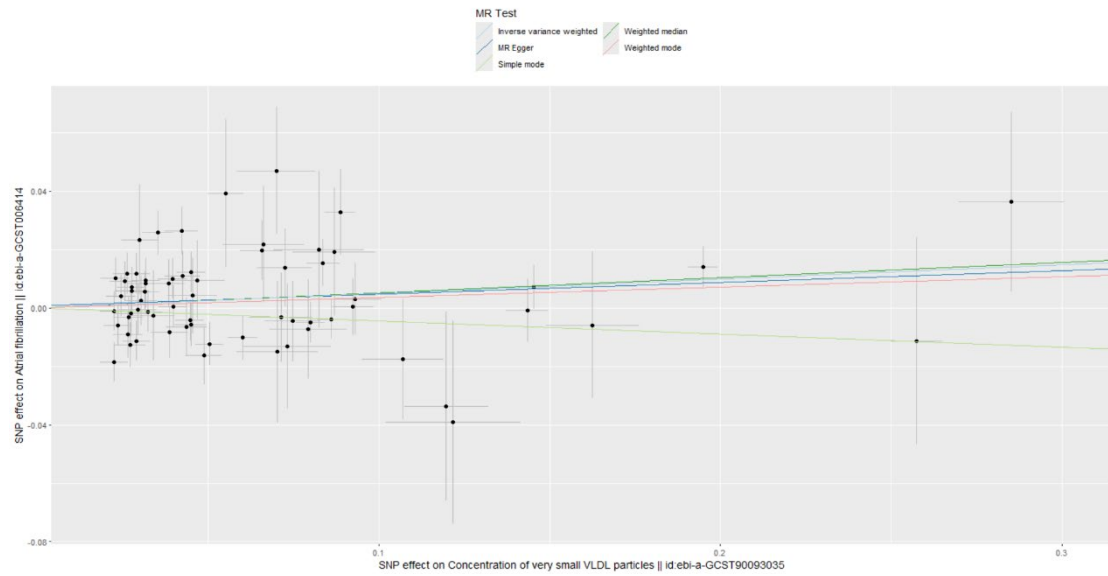

## 30) Total lipids in chylomicrons and extremely large VLDL and AF

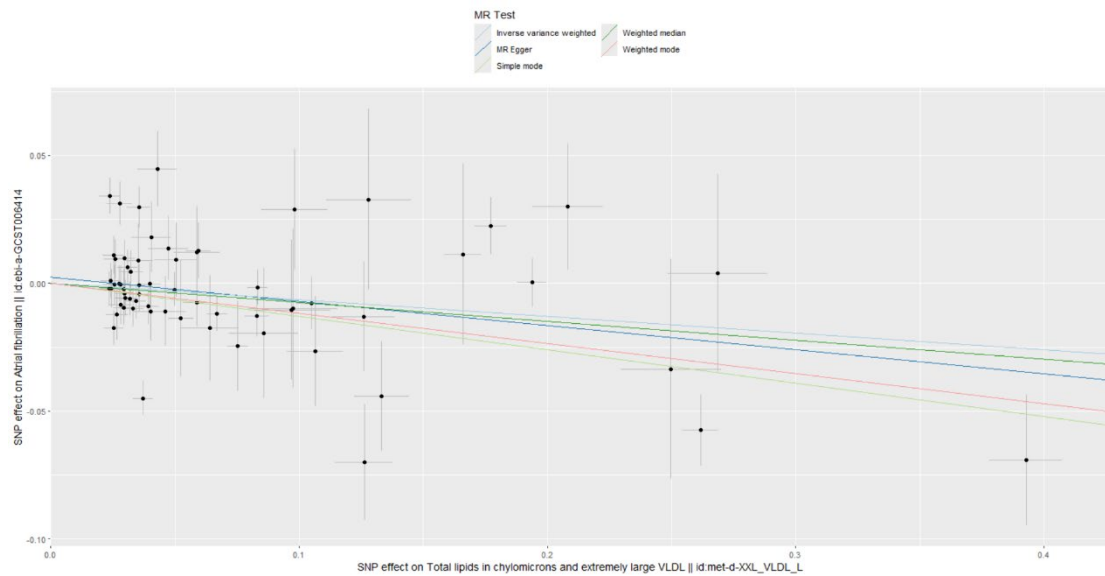

Figure S2 Forest plot of MR effect size using IVW methods for causal associations between lipid traits and atrial fibrillation.

1) Cholesterol to total lipids ratio in medium VLDL and AF

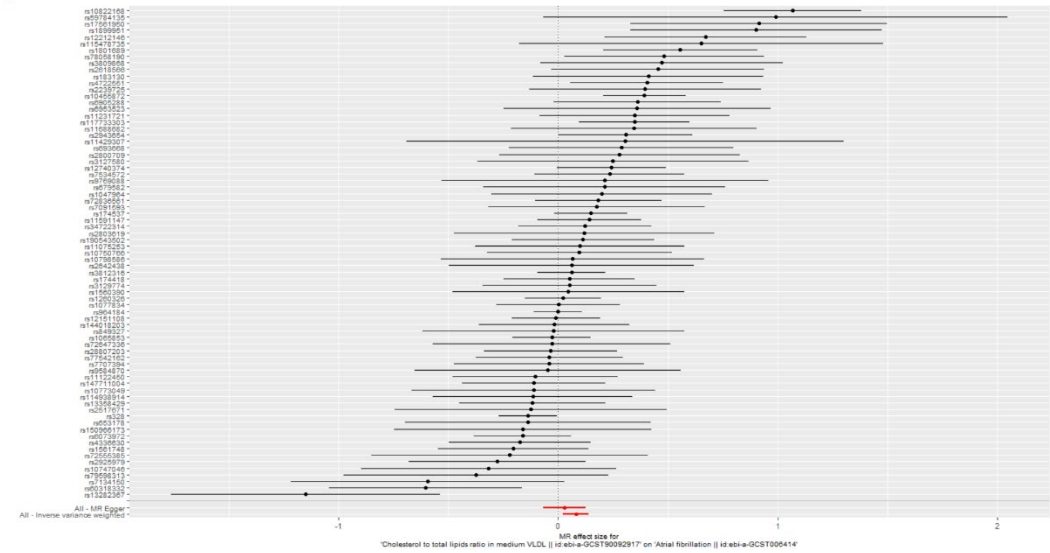

2) Cholesterol to total lipids ratio in small VLDL and AF

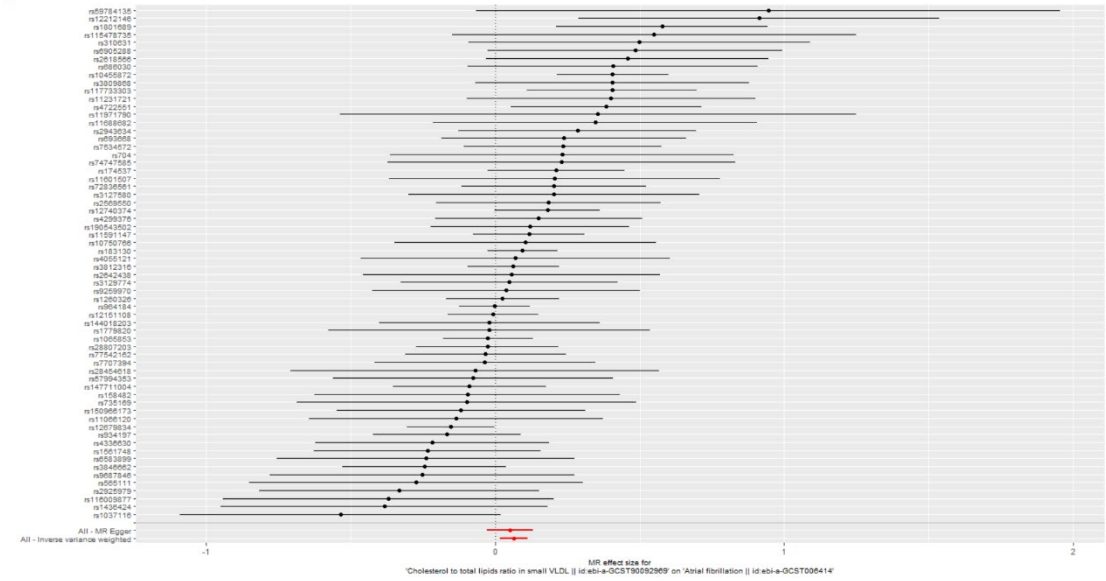

### 3) Cholesterol to total lipids ratio in large VLDL and AF

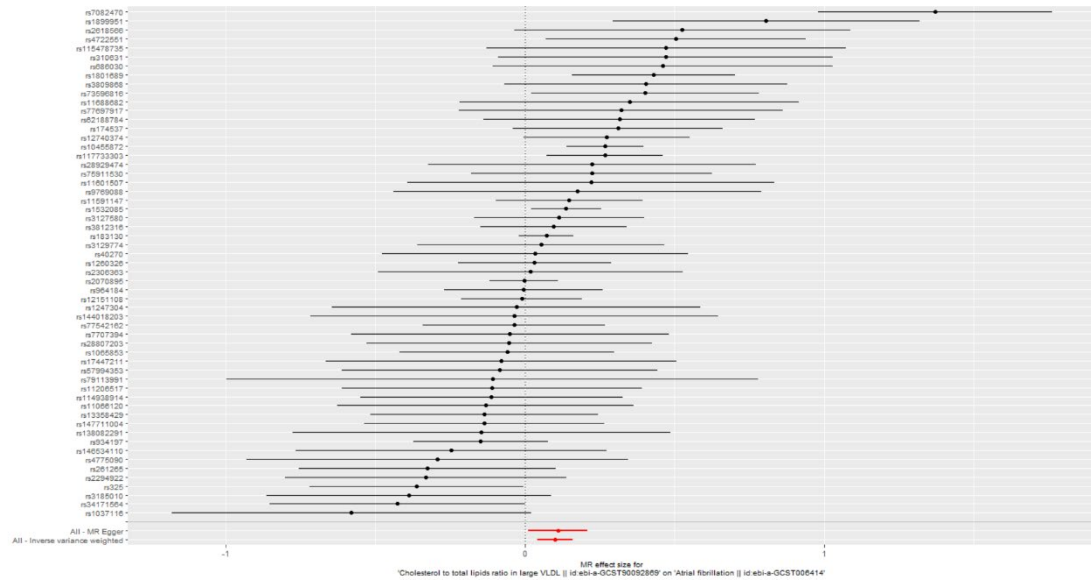

### 4) Cholesterol to total lipids ratio in very large VLDL and AF

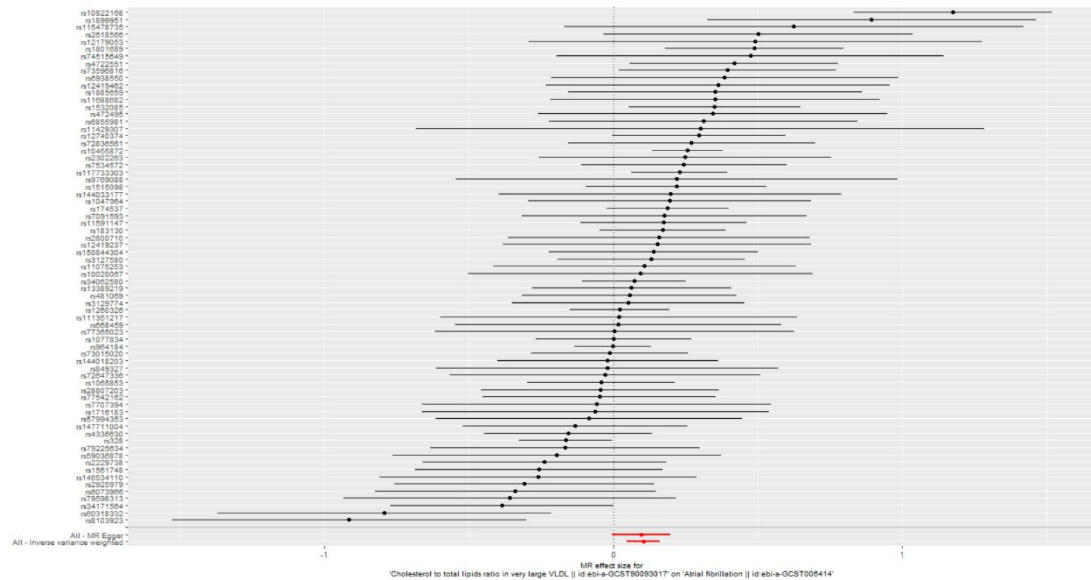

5) Cholesterol to total lipids ratio in chylomicrons and extremely large VLDL and AF

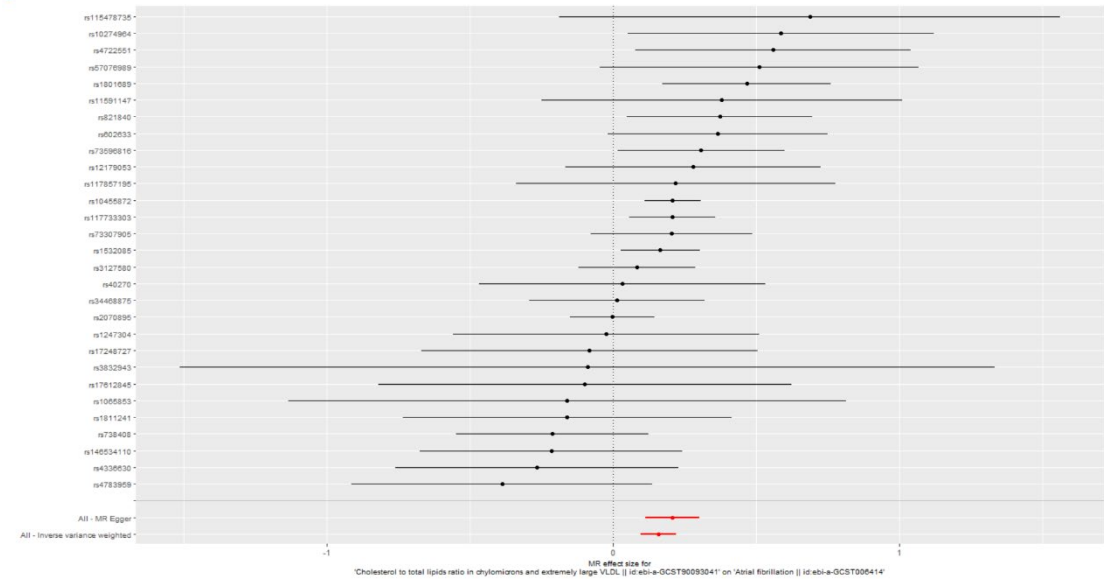

6) Cholesterol levels in very small VLDL and AF

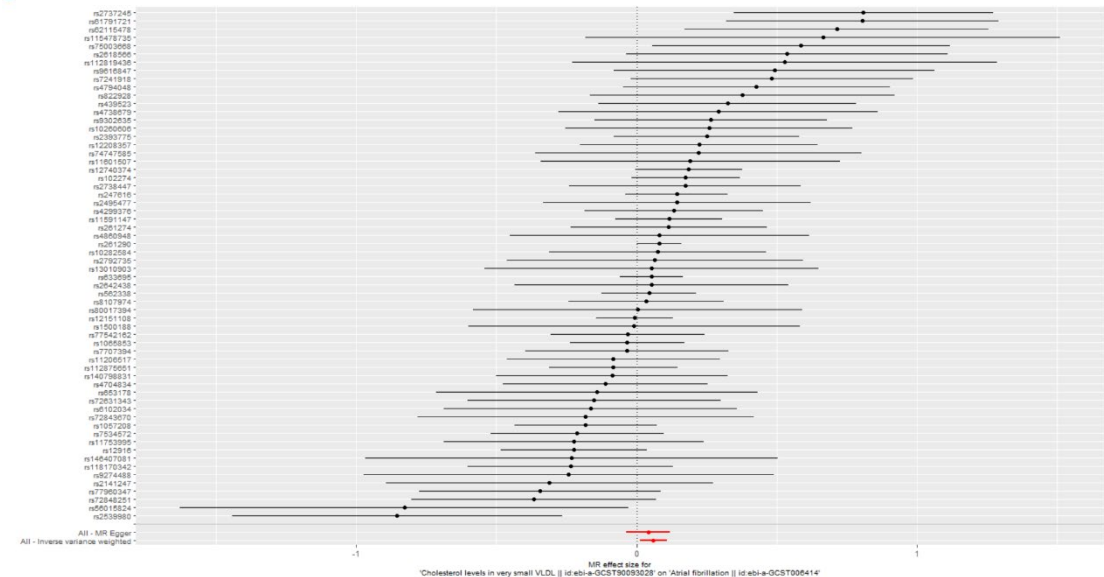

## 7) Cholesteryl esters to total lipids ratio in medium VLDL and AF

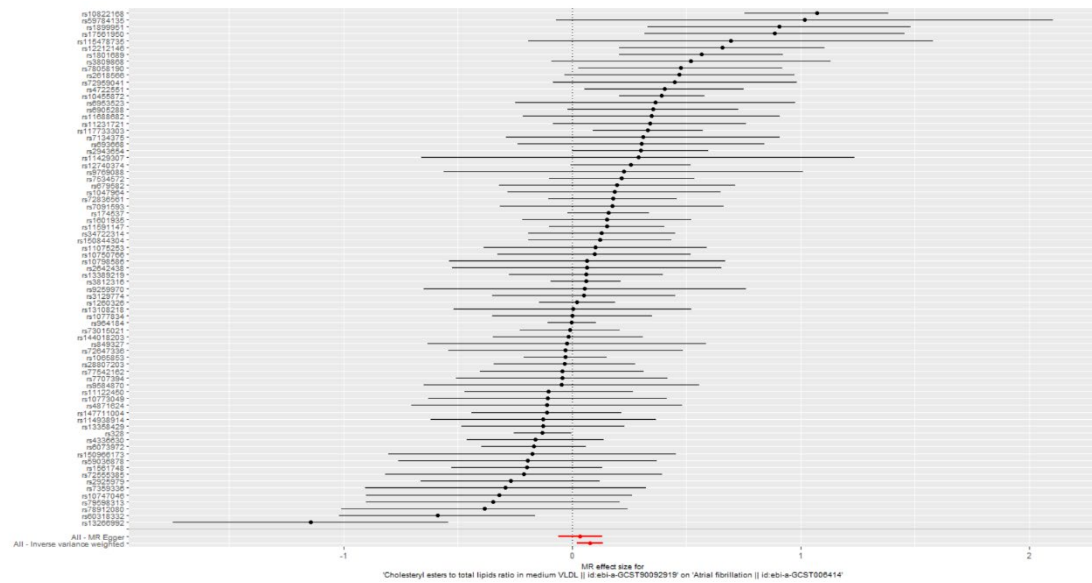

## 8) Cholesteryl esters to total lipids ratio in small VLDL and AF

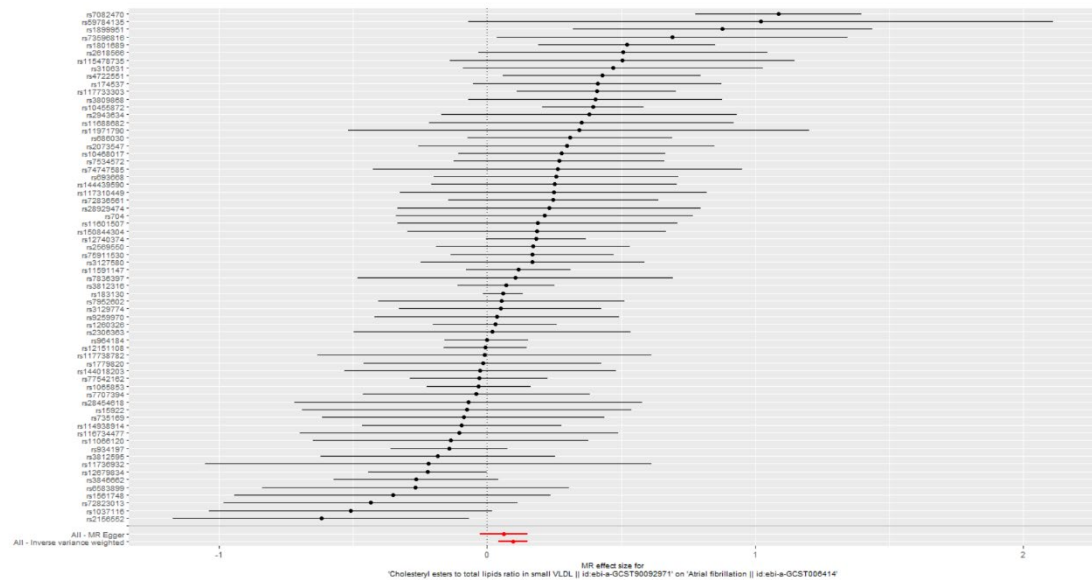

## 9) Cholesteryl esters to total lipids ratio in large VLDL and AF

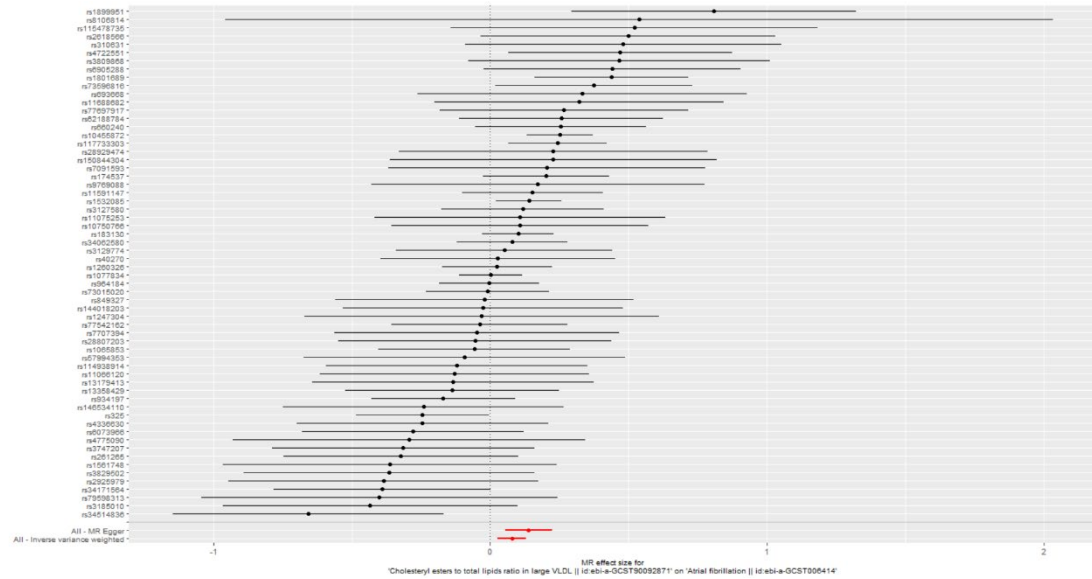

## 10) Cholesteryl esters to total lipids ratio in very large VLDL and AF

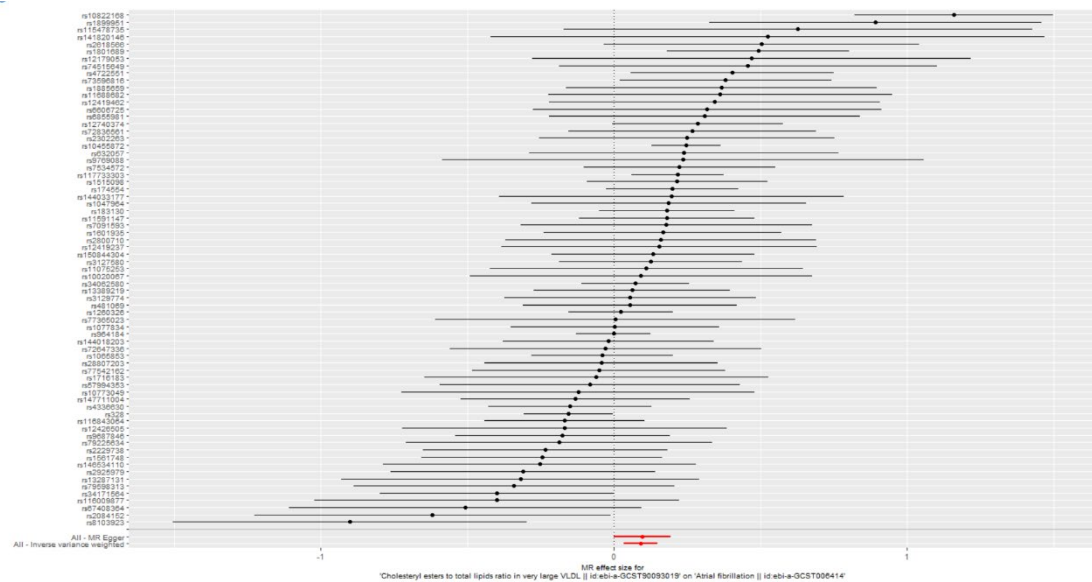

## 11) Cholesteryl esters to total lipids ratio in chylomicrons and extremely large VLDL and AF

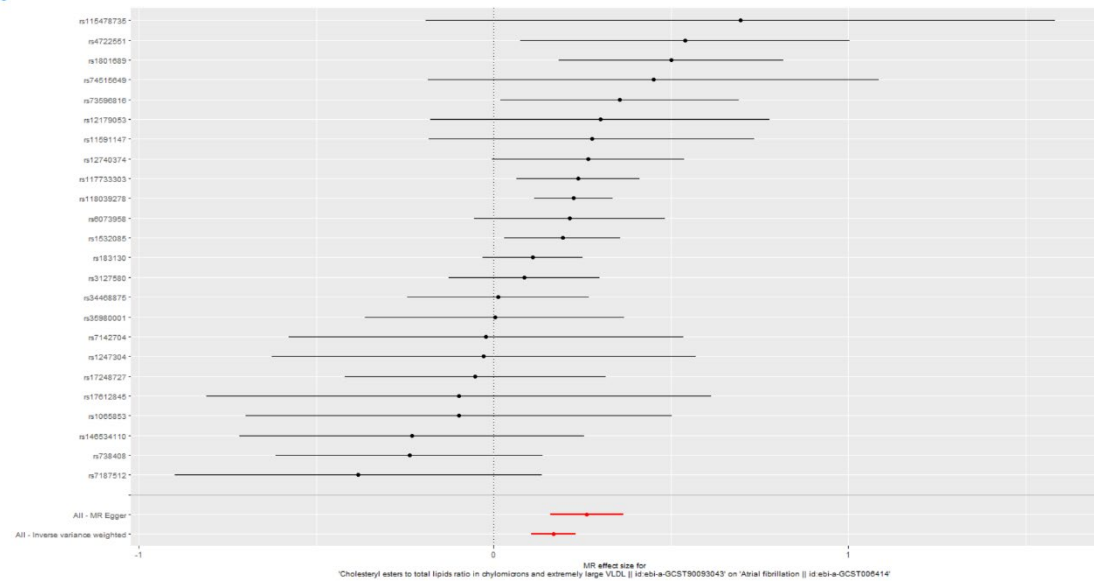

## 12) Cholesteryl esters in very small VLDL and AF

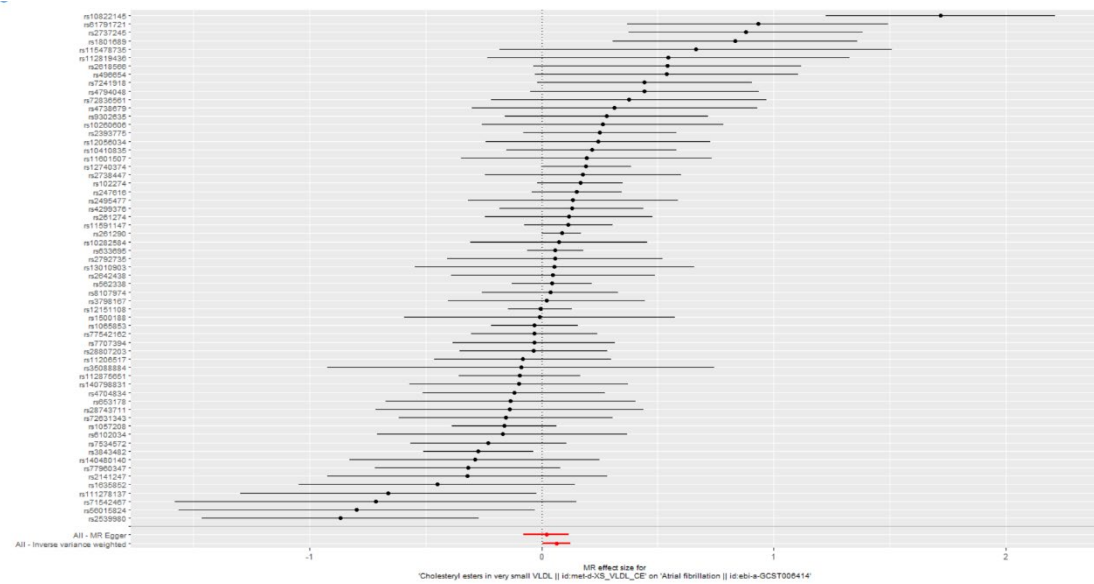

13) Free cholesterol to total lipids ratio in medium VLDL and AF

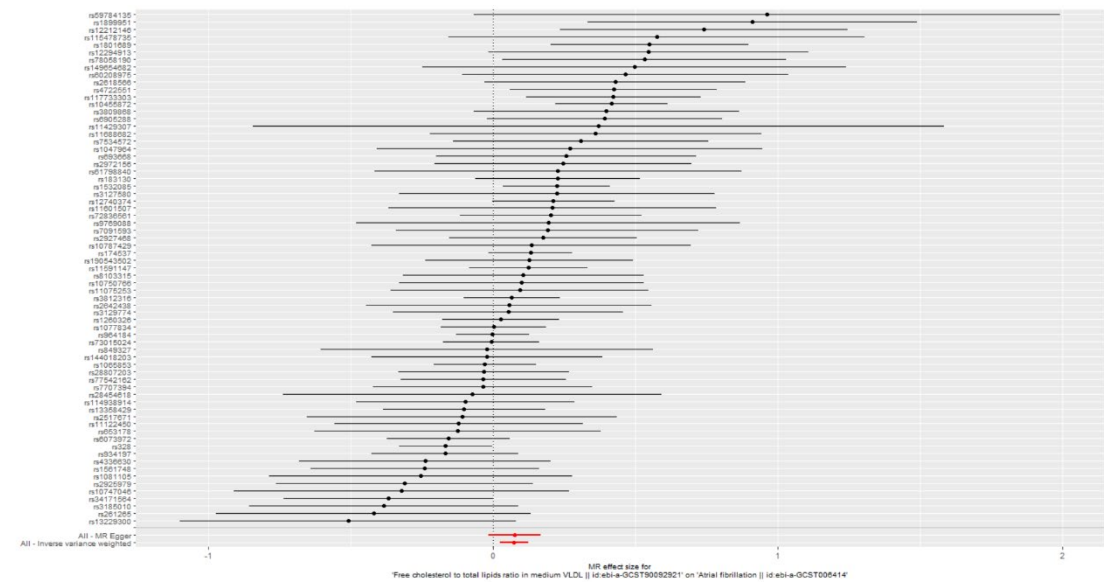

14) Free cholesterol to total lipids ratio in large VLDL and AF

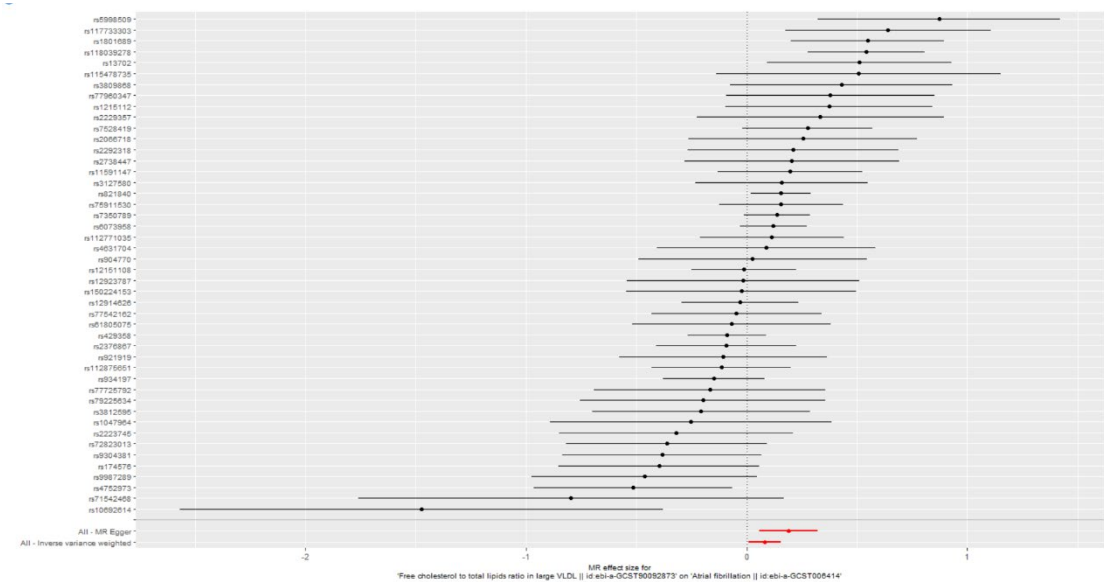

15) Free cholesterol to total lipids ratio in very large VLDL and AF

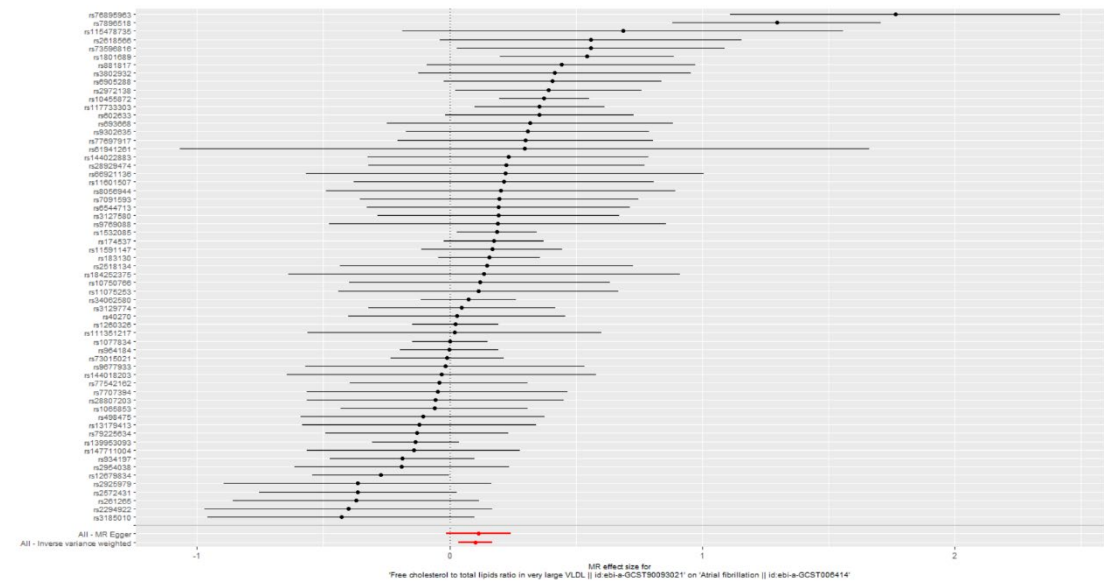

16) Free cholesterol to total lipids ratio in chylomicrons and extremely large VLDL and AF

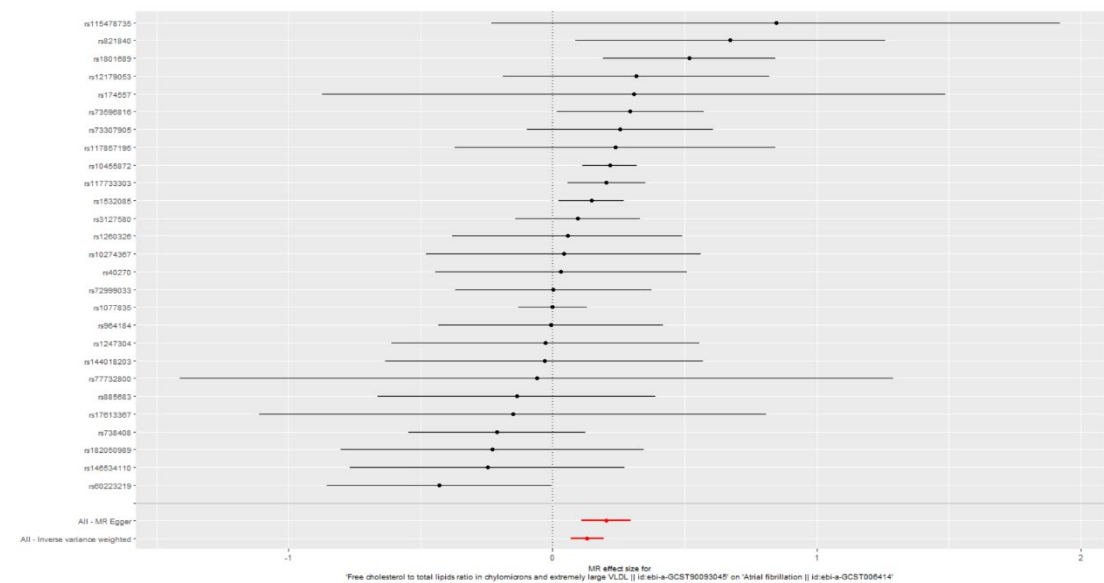

17) Free cholesterol levels in very small VLDL and AF

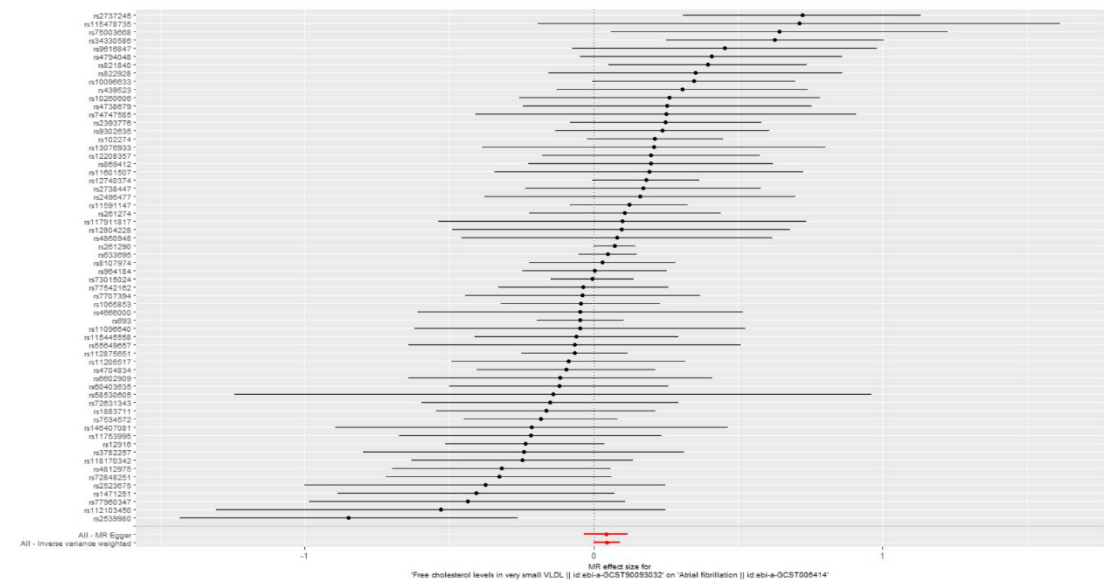

18) Phospholipids to total lipids ratio in medium VLDL and AF

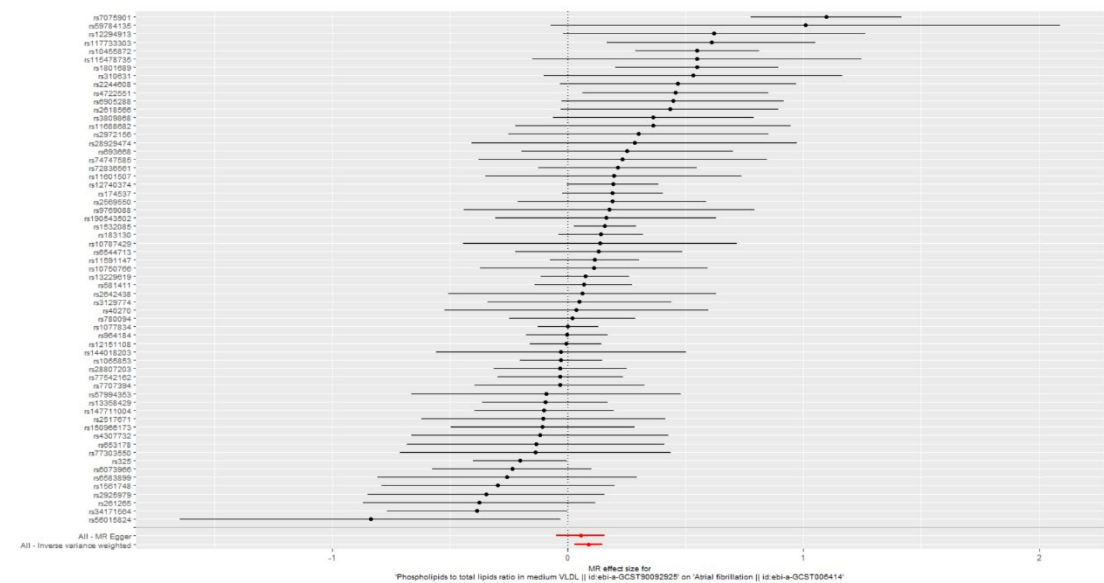

19) Phospholipids to total lipids ratio in chylomicrons and extremely large VLDL and AF

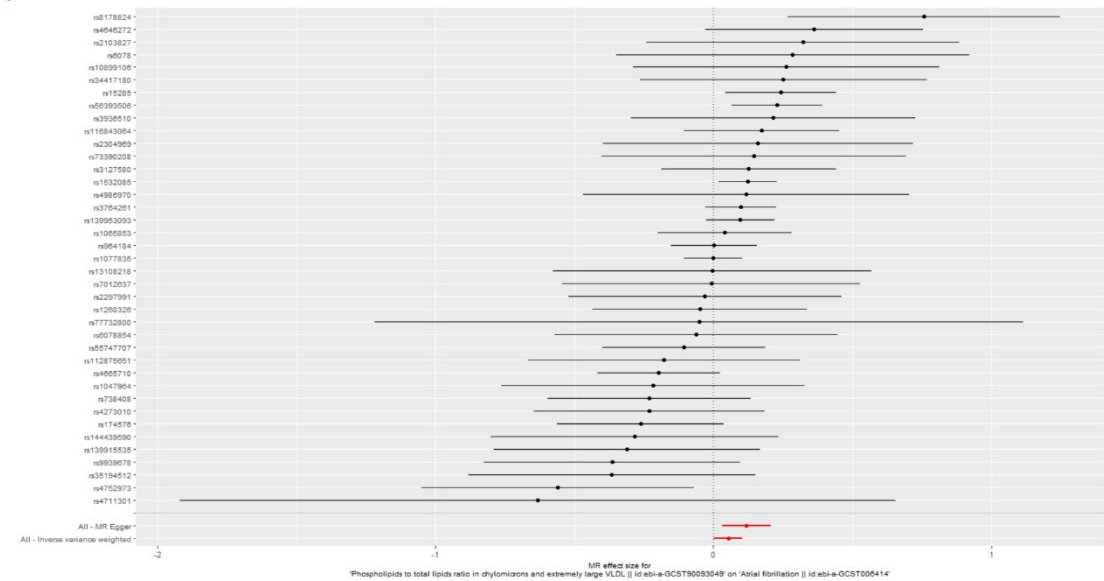

20) Phospholipids in IDL and AF

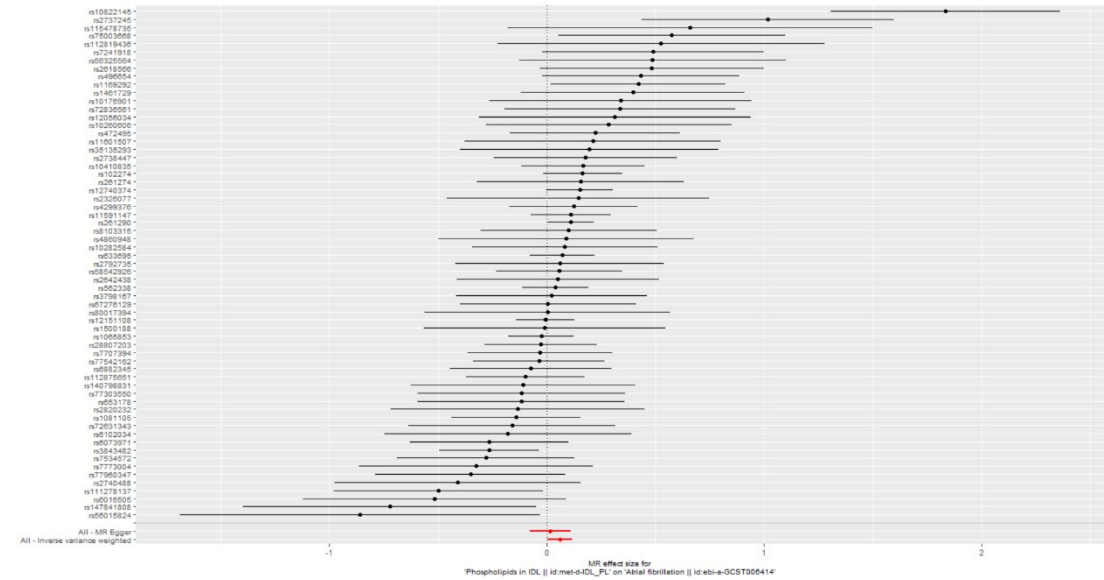

## 21) Triglycerides to total lipids ratio in medium VLDL and AF

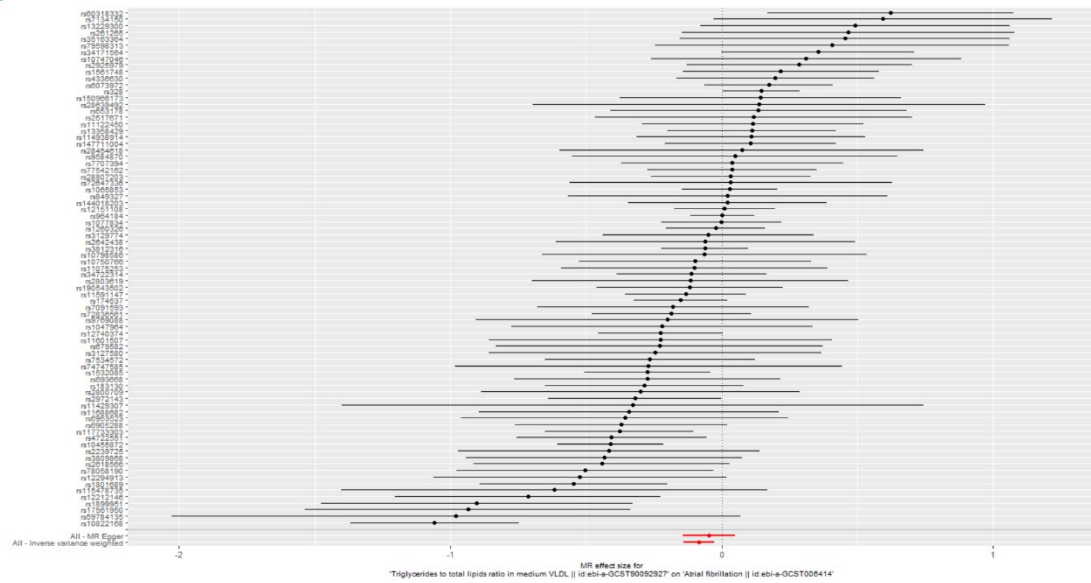

## 22) Triglycerides to total lipids ratio in small VLDL and AF

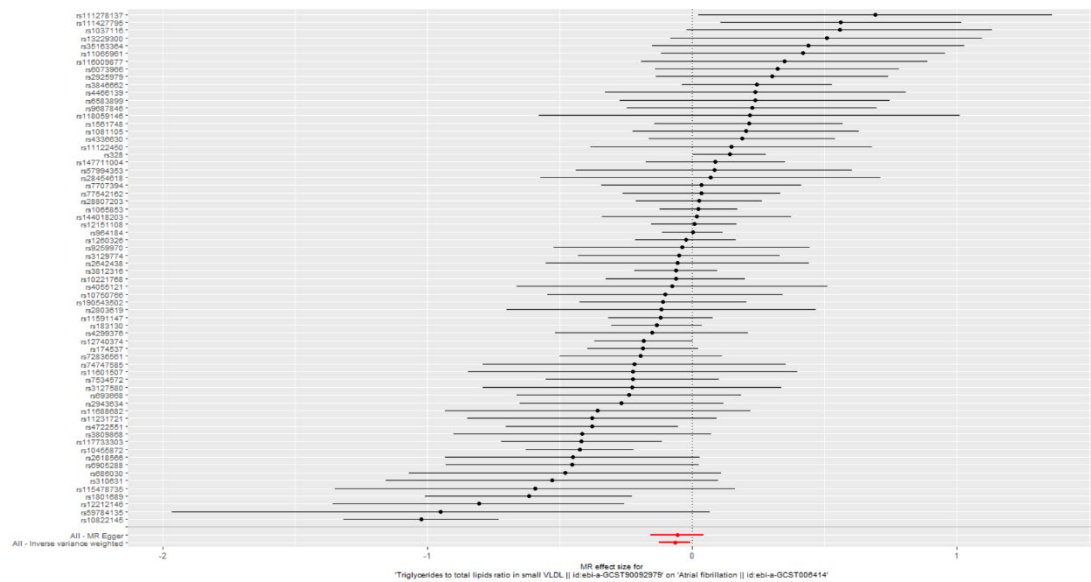

### 23) Triglycerides to total lipids ratio in large VLDL and AF

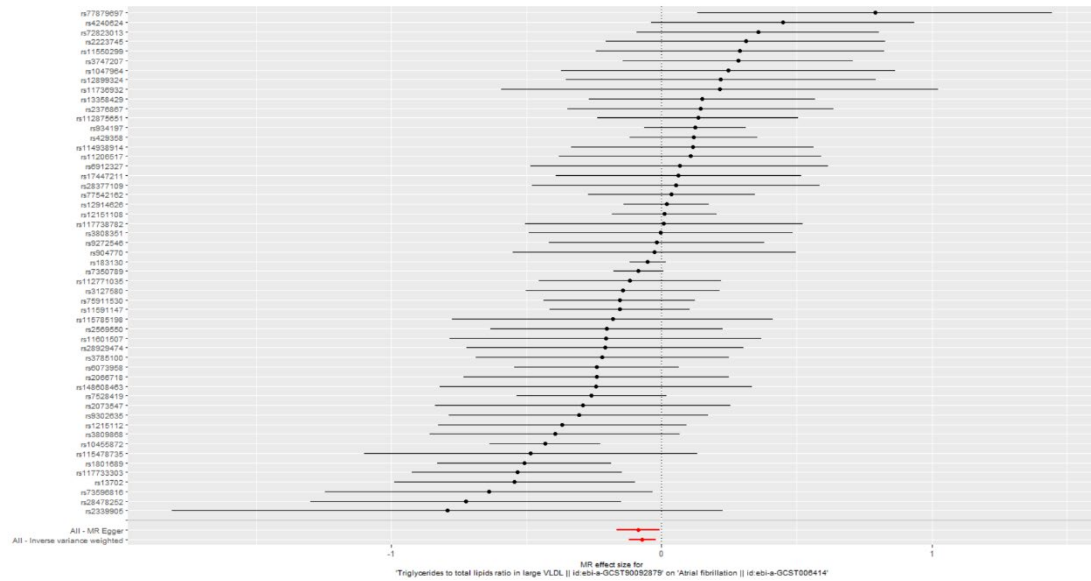

### 24) Triglycerides to total lipids ratio in very large VLDL and AF

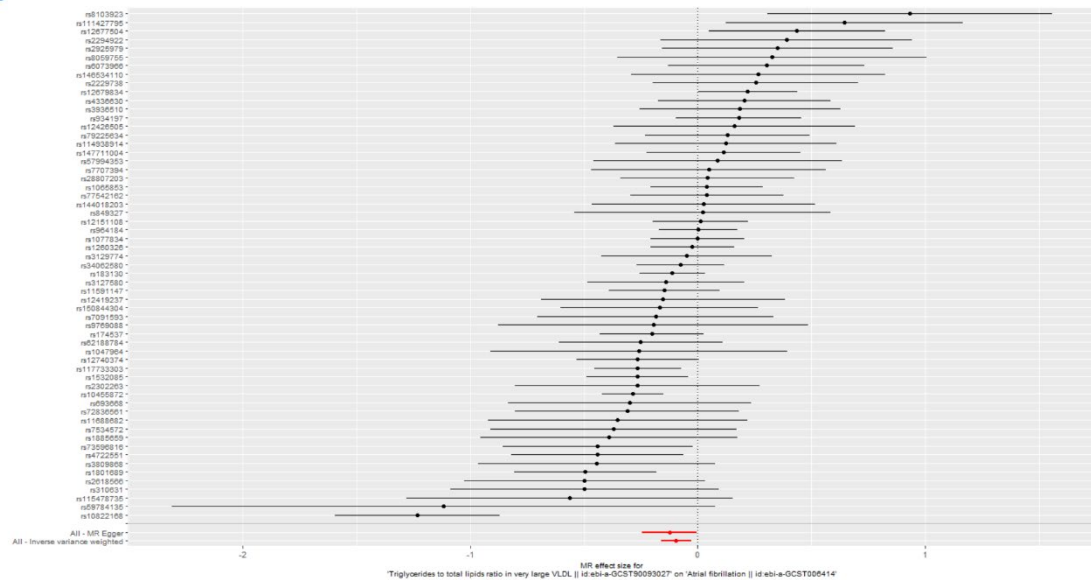

## 25) Triglycerides in chylomicrons and extremely large VLDL and AF

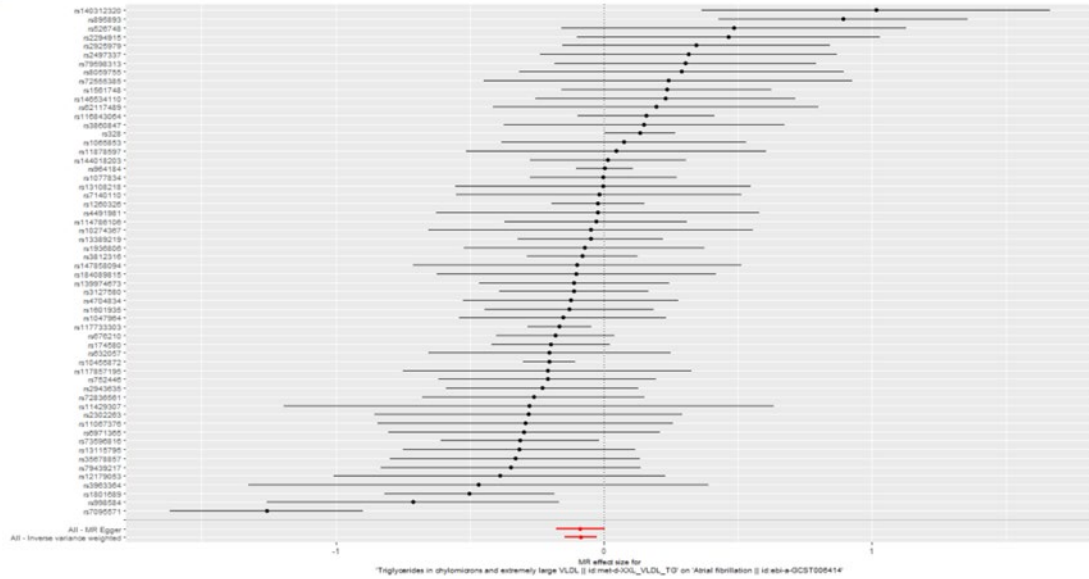

## 26) Ratio of monounsaturated fatty acids to total fatty acids and AF

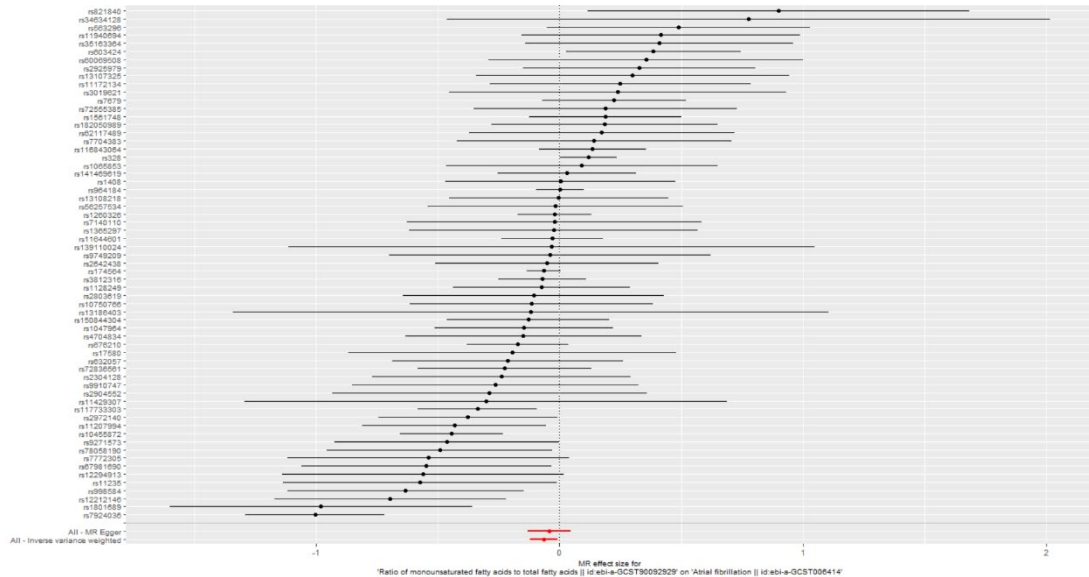

## 27) Average diameter for VLDL particles and AF

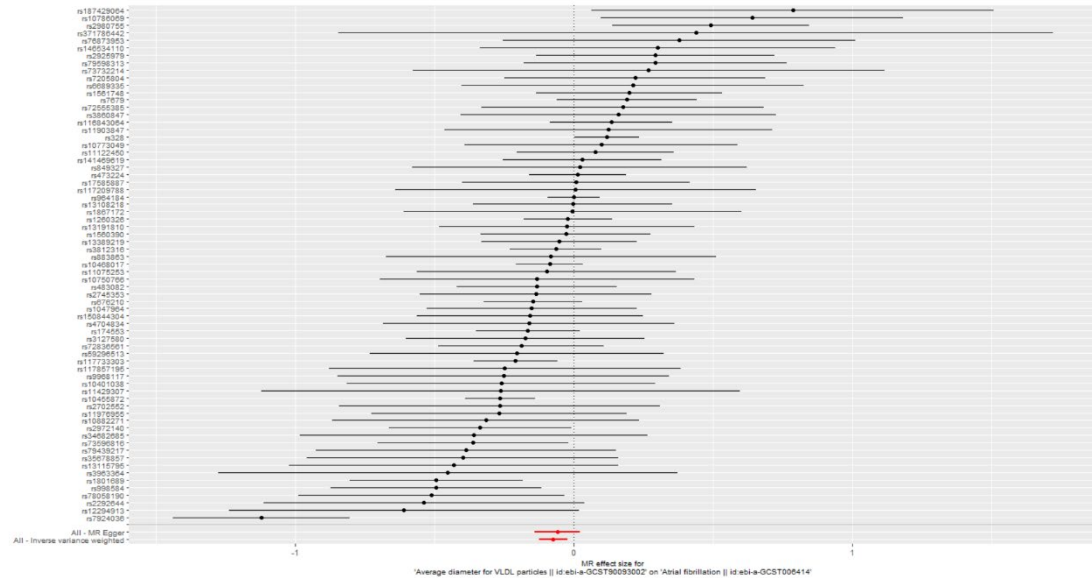

## 28) Concentration of IDL particles and AF

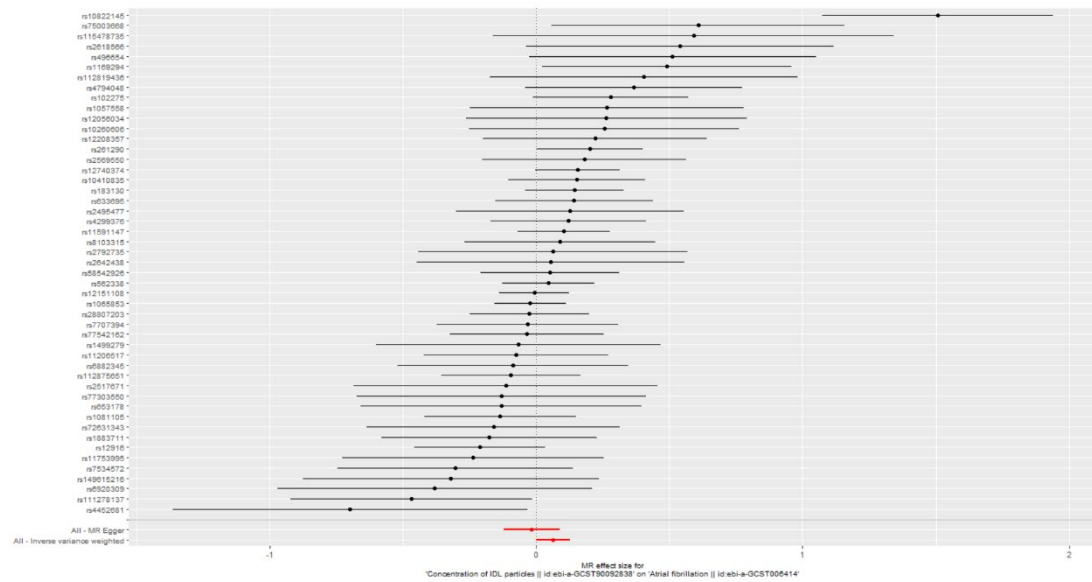

## 29) Concentration of very small VLDL particles and AF

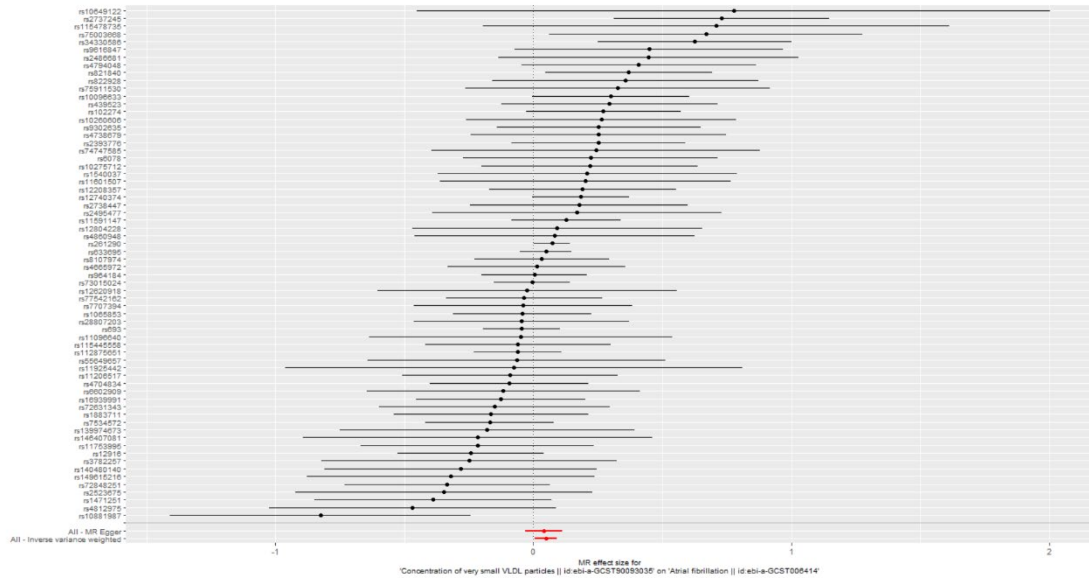

## 30) Total lipids in chylomicrons and extremely large VLDL and AF

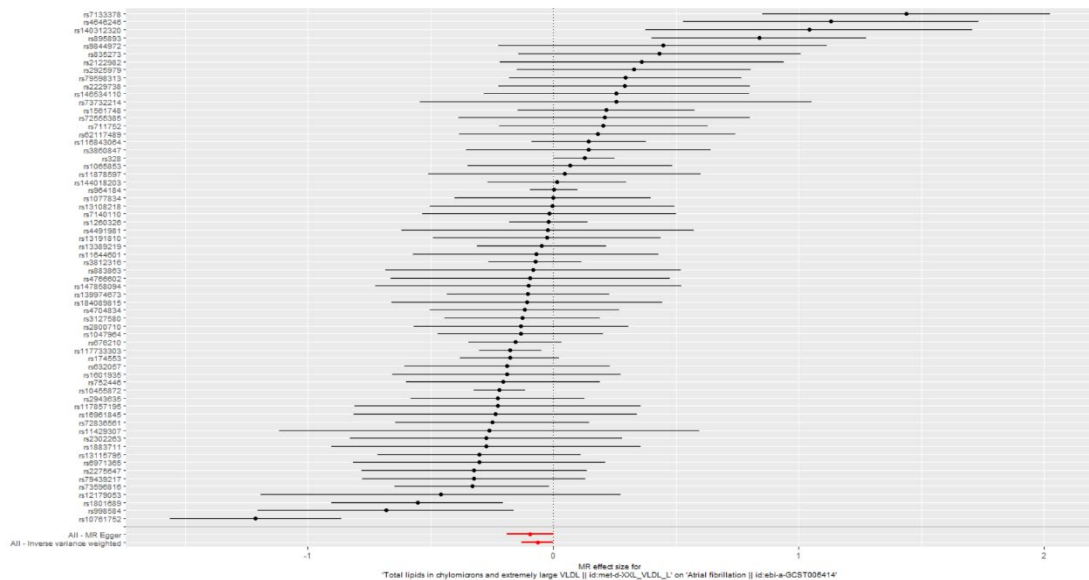

Figure S3 Funnel plot of causal associations between lipid traits and atrial fibrillation.

1) Cholesterol to total lipids ratio in medium VLDL and AF

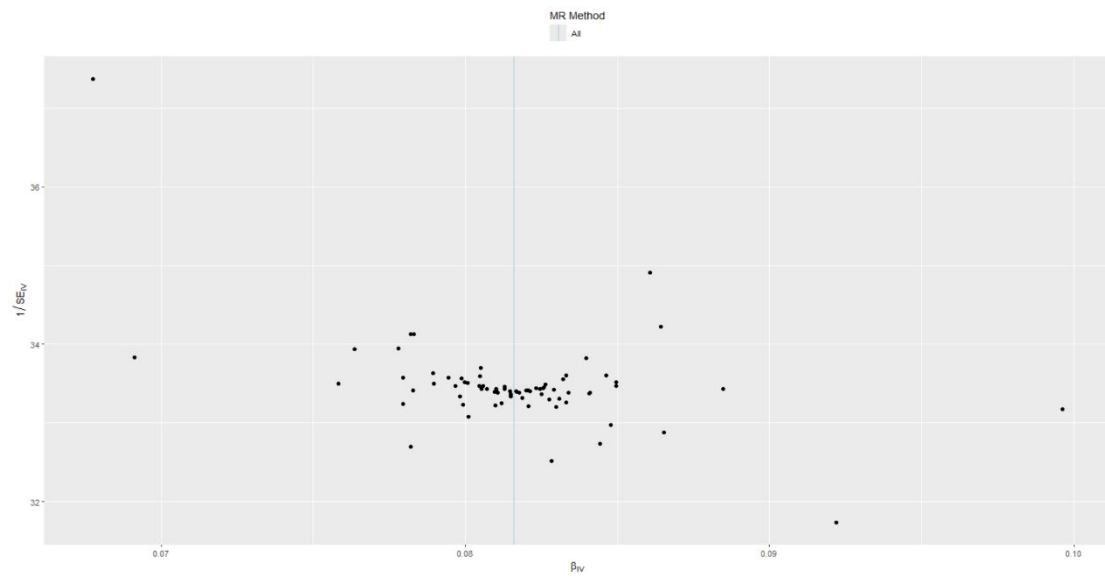

2) Cholesterol to total lipids ratio in small VLDL and AF

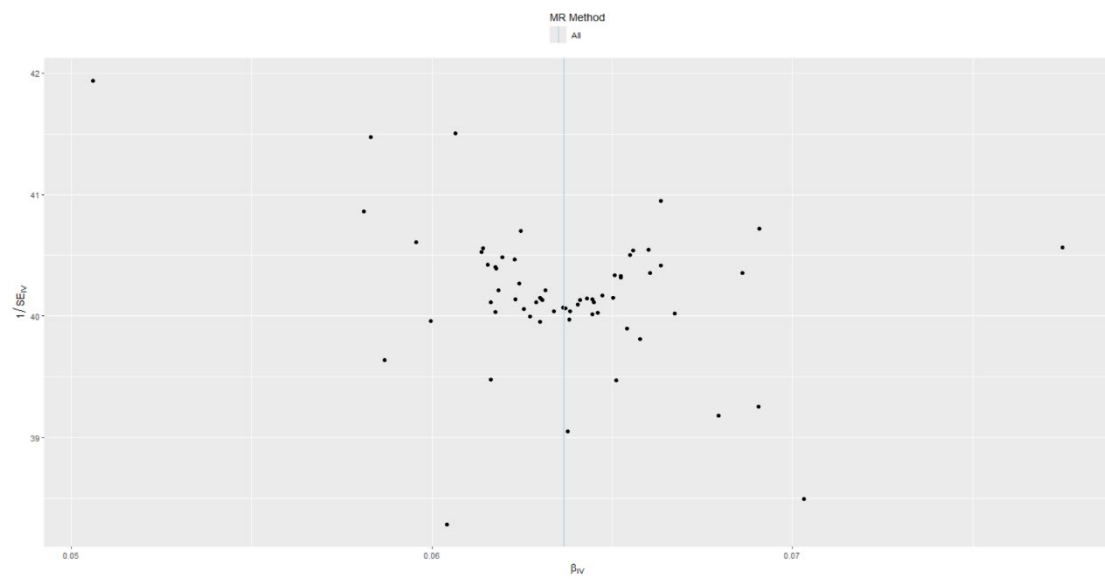

3) Cholesterol to total lipids ratio in large VLDL and AF

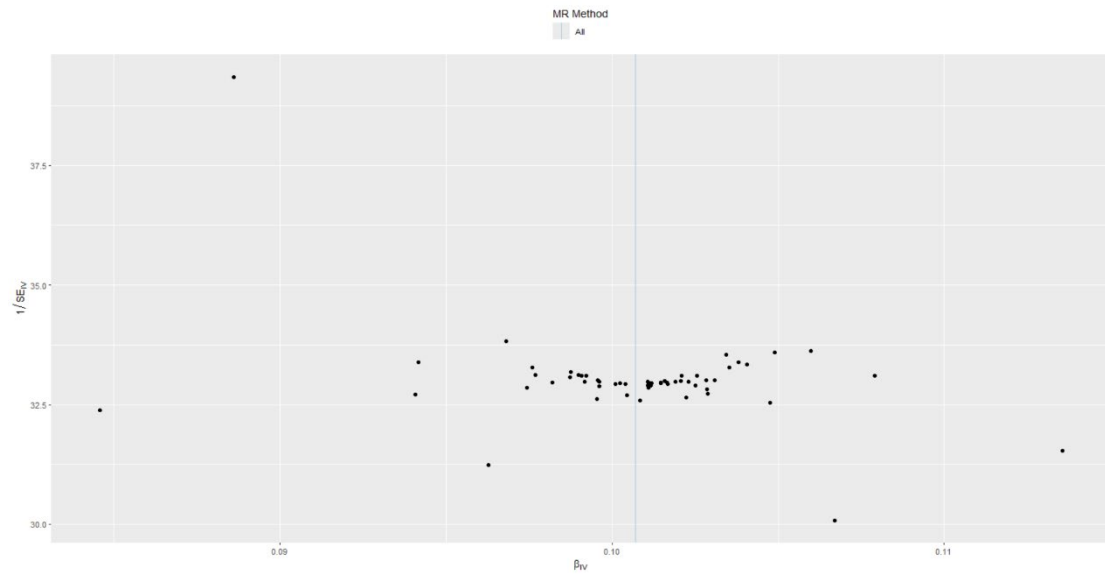

4) Cholesterol to total lipids ratio in very large VLDL and AF

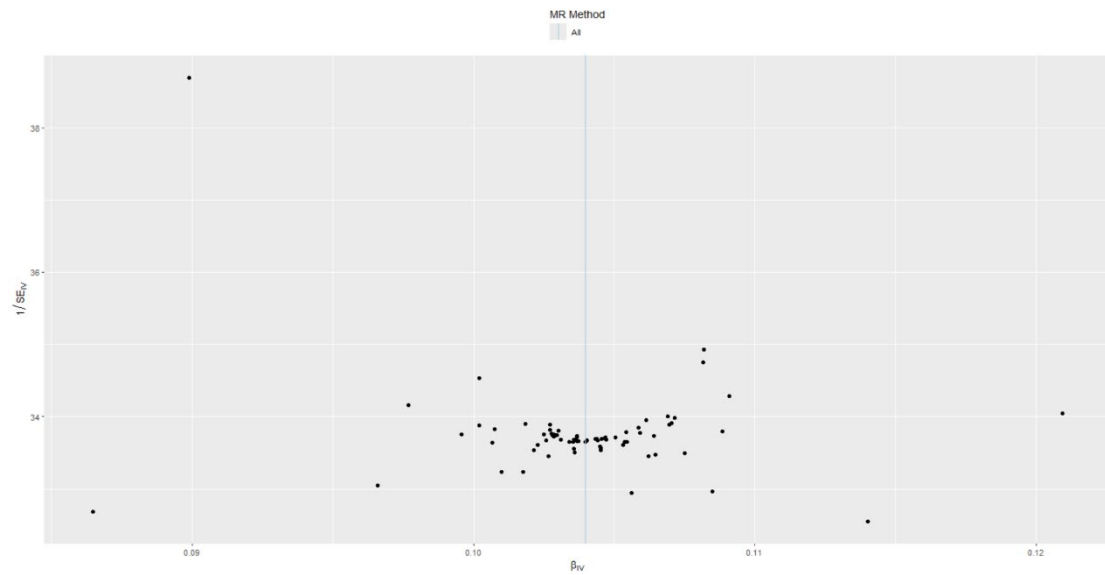

5) Cholesterol to total lipids ratio in chylomicrons and extremely large VLDL and AF

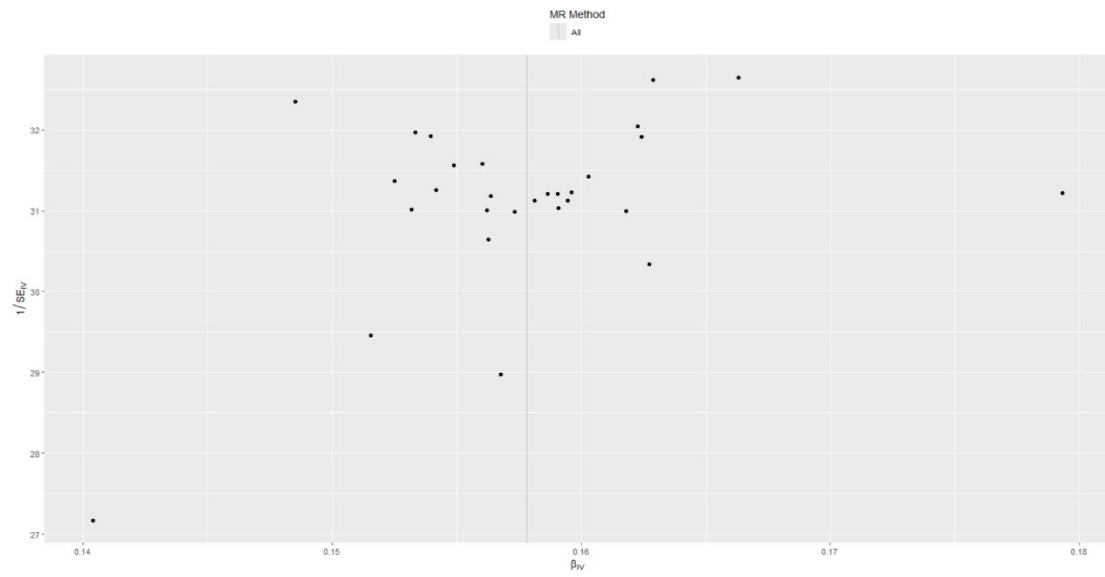

6) Cholesterol levels in very small VLDL and AF

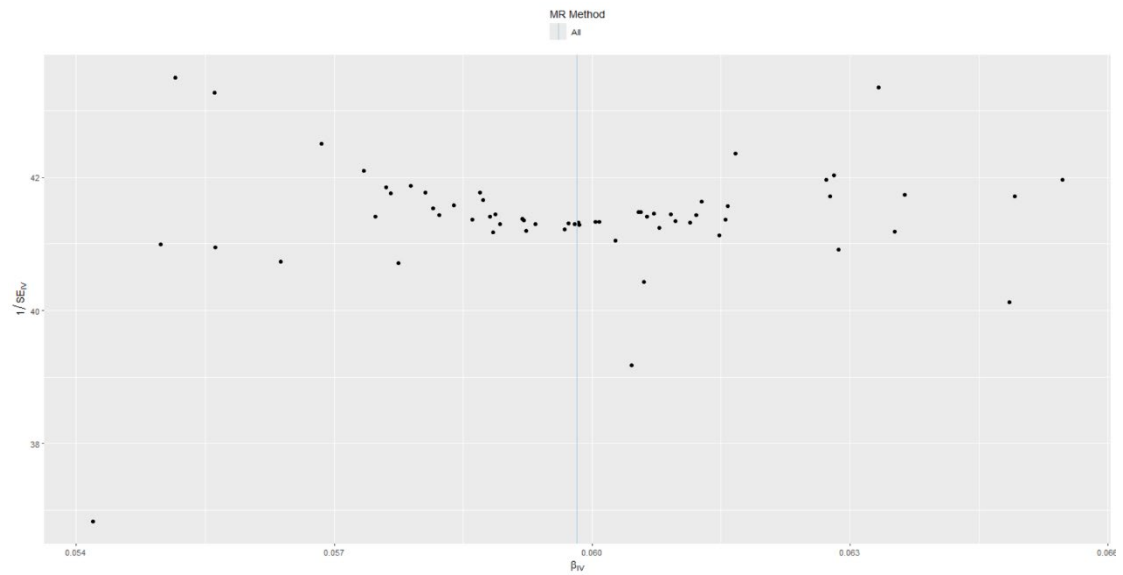

7) Cholesteryl esters to total lipids ratio in medium VLDL and AF

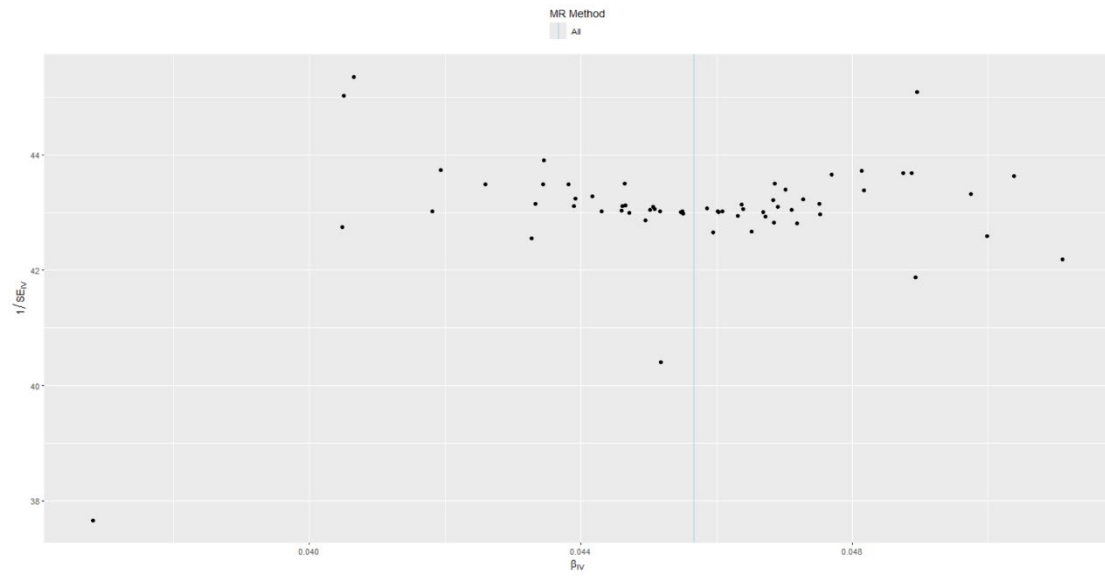

8) Cholesteryl esters to total lipids ratio in small VLDL and AF

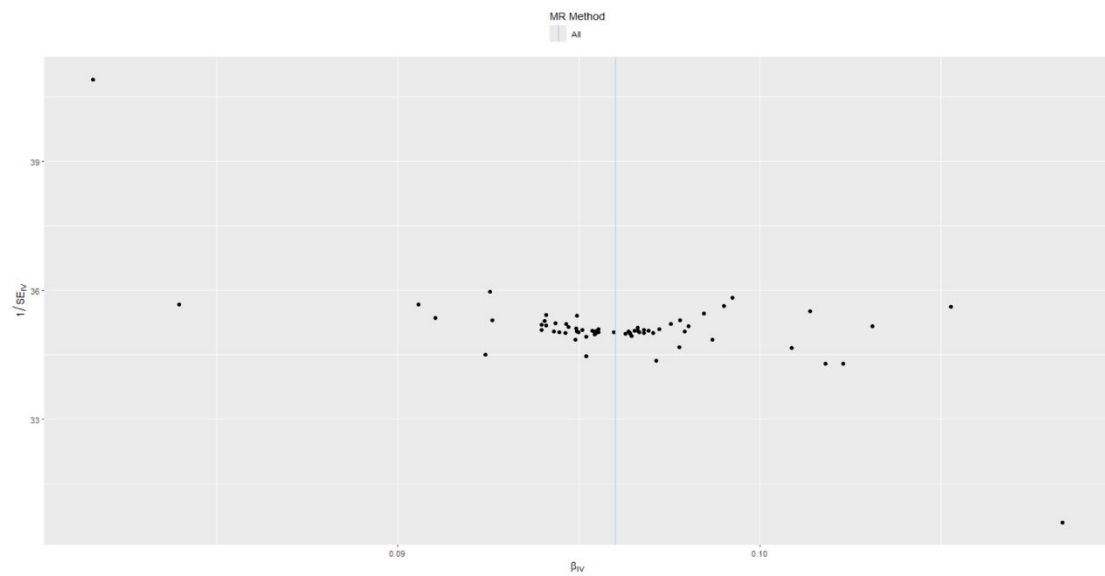

9) Cholesteryl esters to total lipids ratio in large VLDL and AF

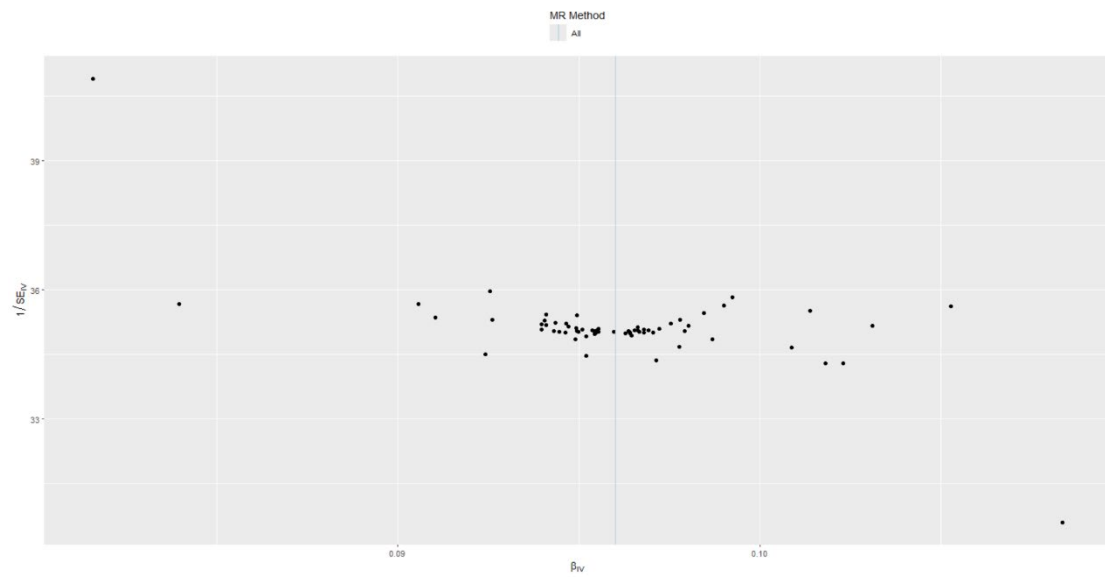

10) Cholesteryl esters to total lipids ratio in very large VLDL and AF

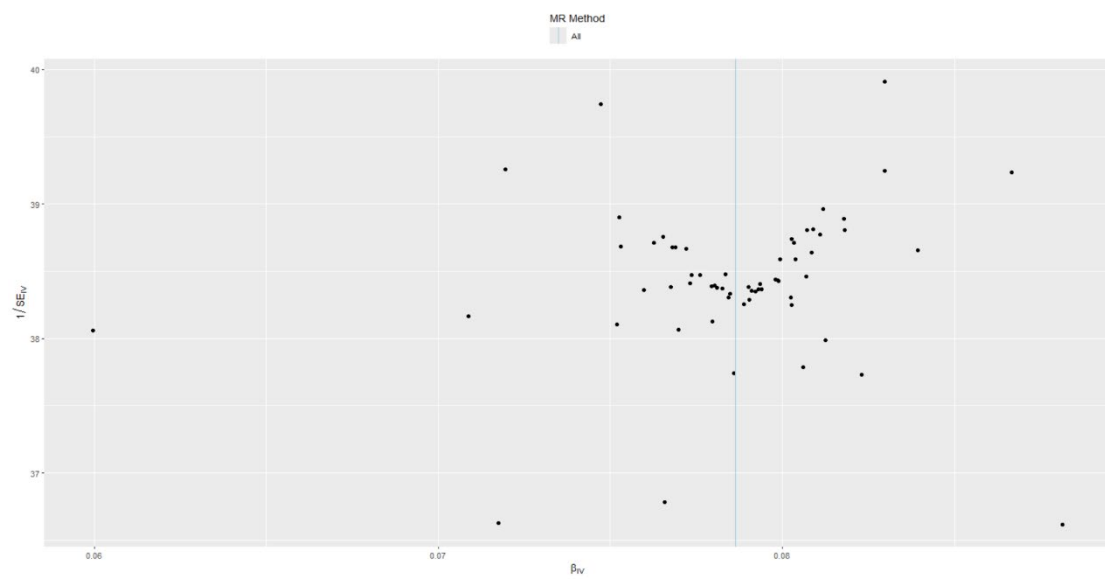

11) Cholesteryl esters to total lipids ratio in chylomicrons and extremely large VLDL and AF

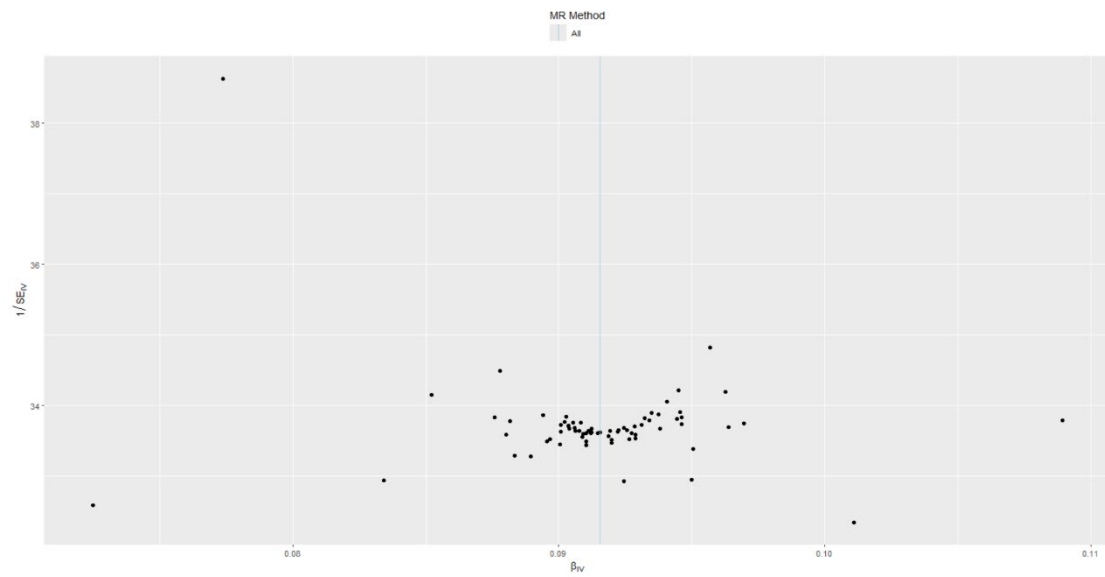

12) Cholesteryl esters in very small VLDL and AF

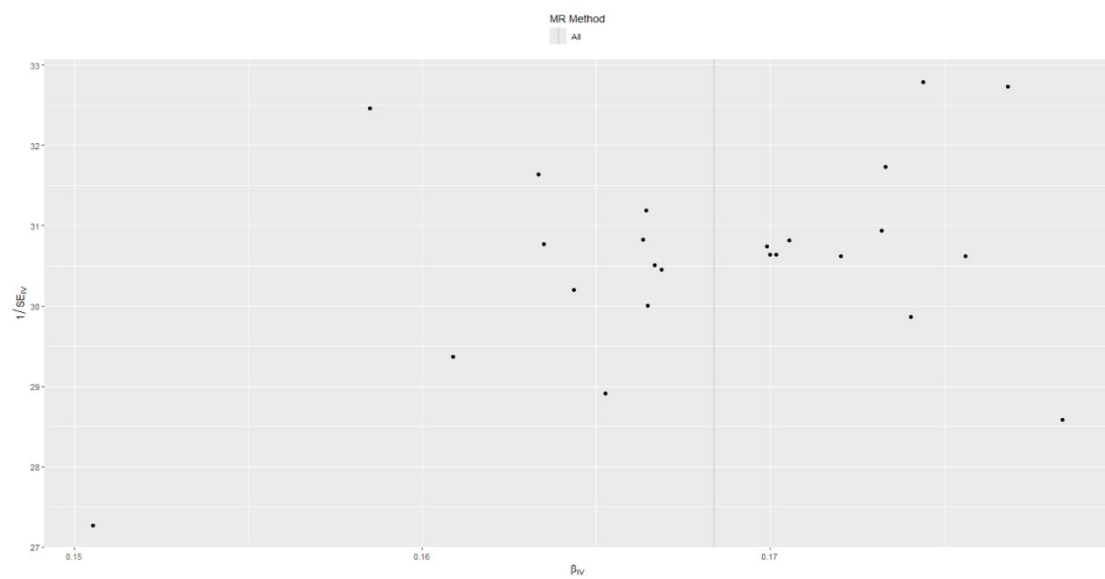

13) Free cholesterol to total lipids ratio in medium VLDL and AF

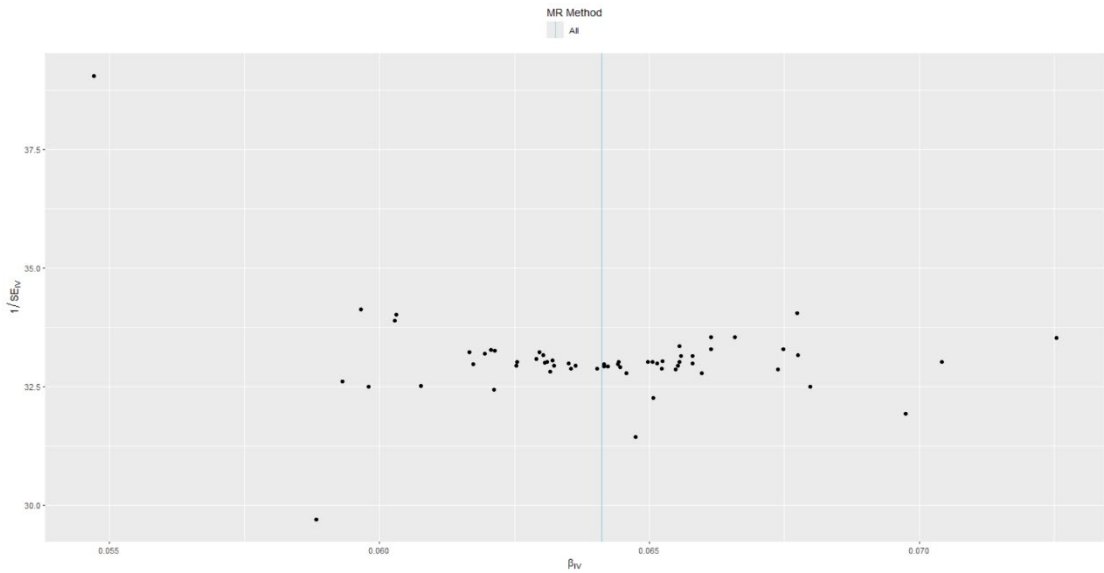

14) Free cholesterol to total lipids ratio in large VLDL and AF

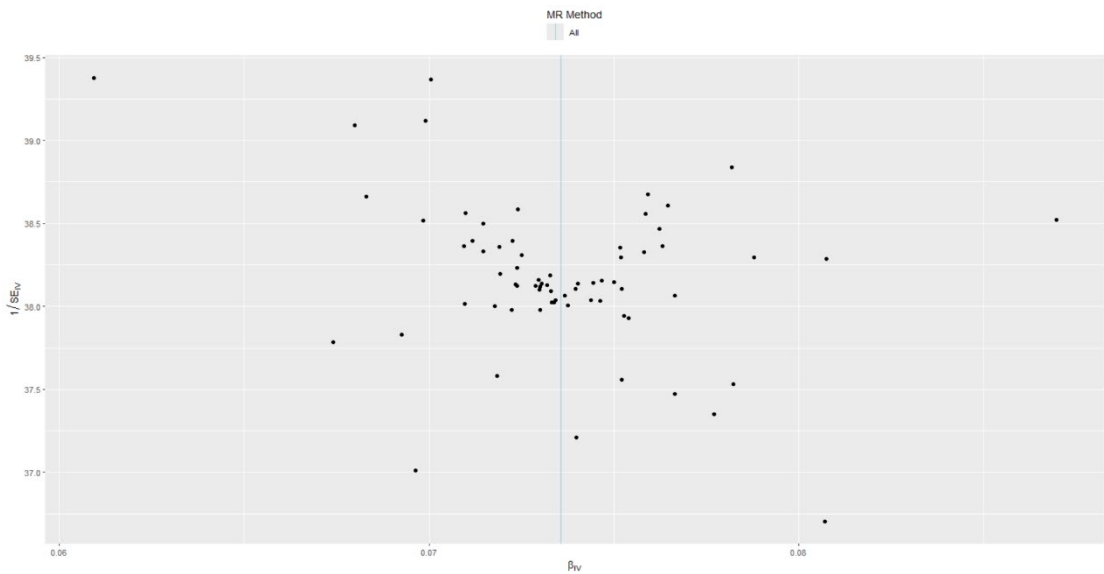

15) Free cholesterol to total lipids ratio in very large VLDL and AF

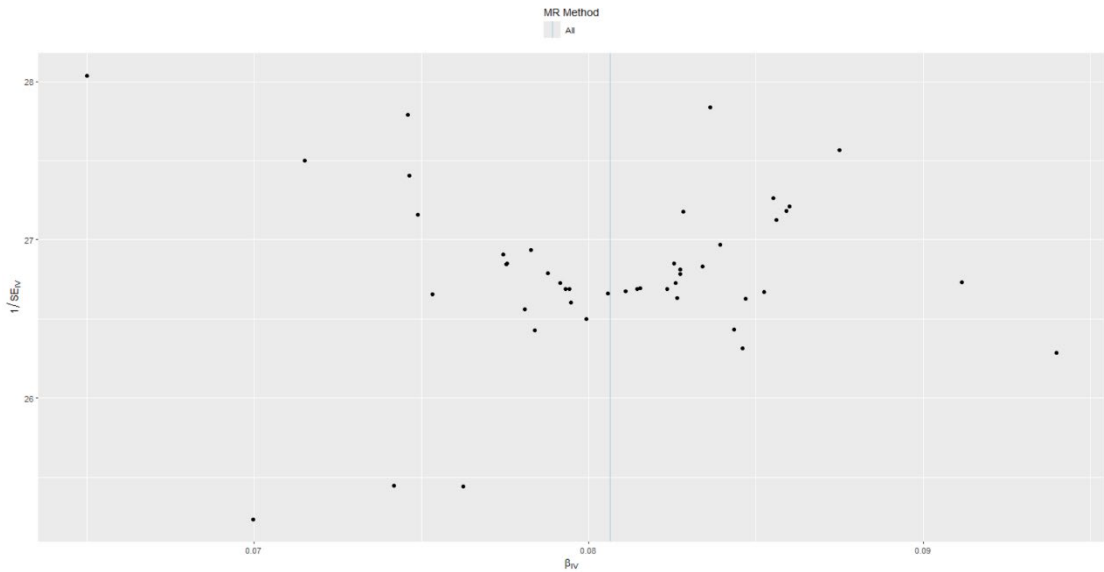

16) Free cholesterol to total lipids ratio in chylomicrons and extremely large VLDL and AF

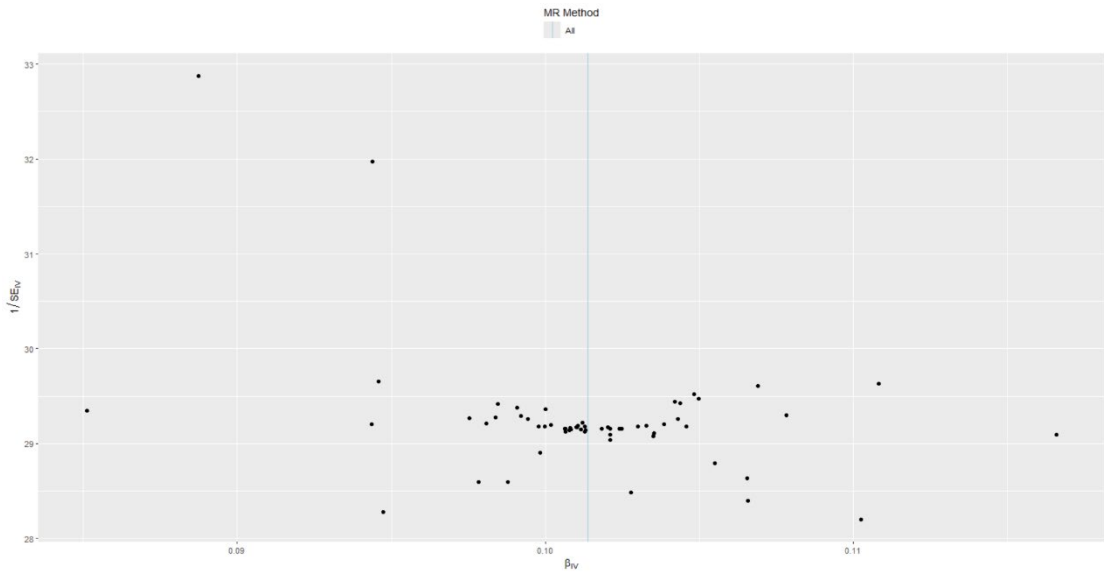

17) Free cholesterol levels in very small VLDL and AF

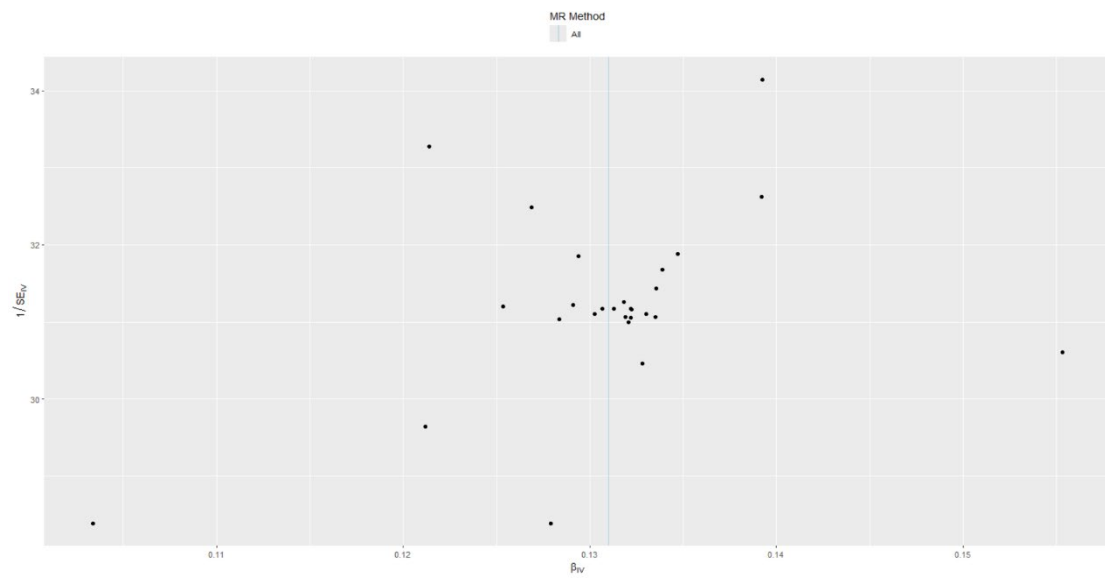

18) Phospholipids to total lipids ratio in medium VLDL and AF

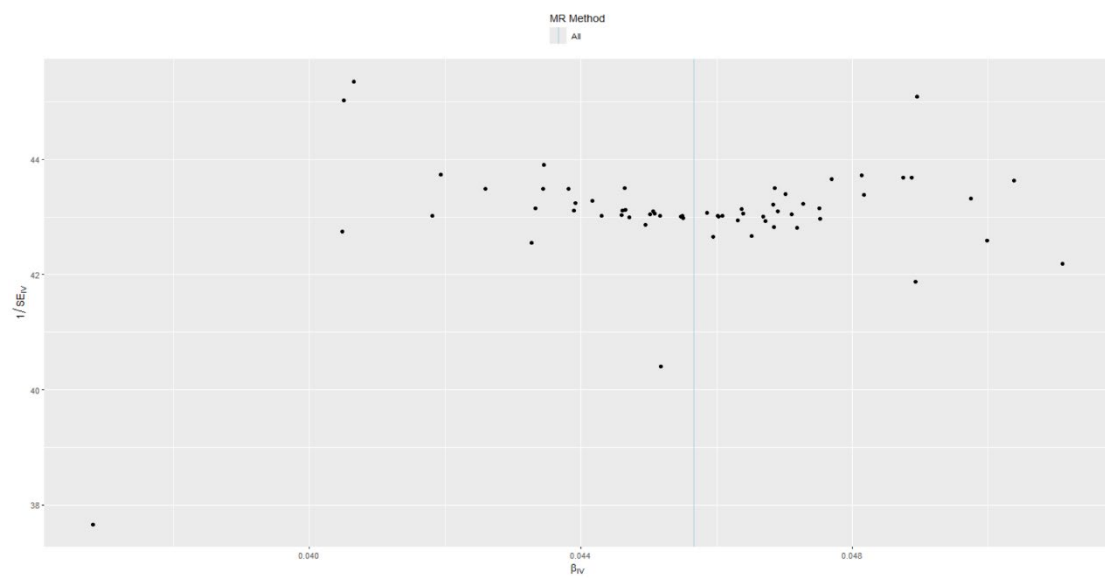

19) Phospholipids to total lipids ratio in chylomicrons and extremely large VLDL and AF

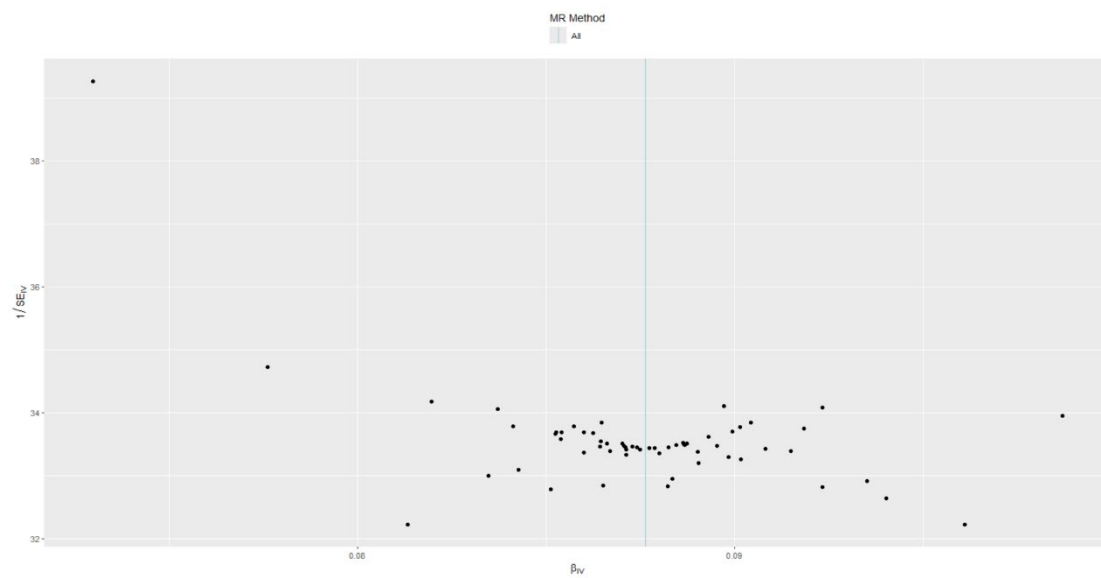

20) Phospholipids in IDL and AF

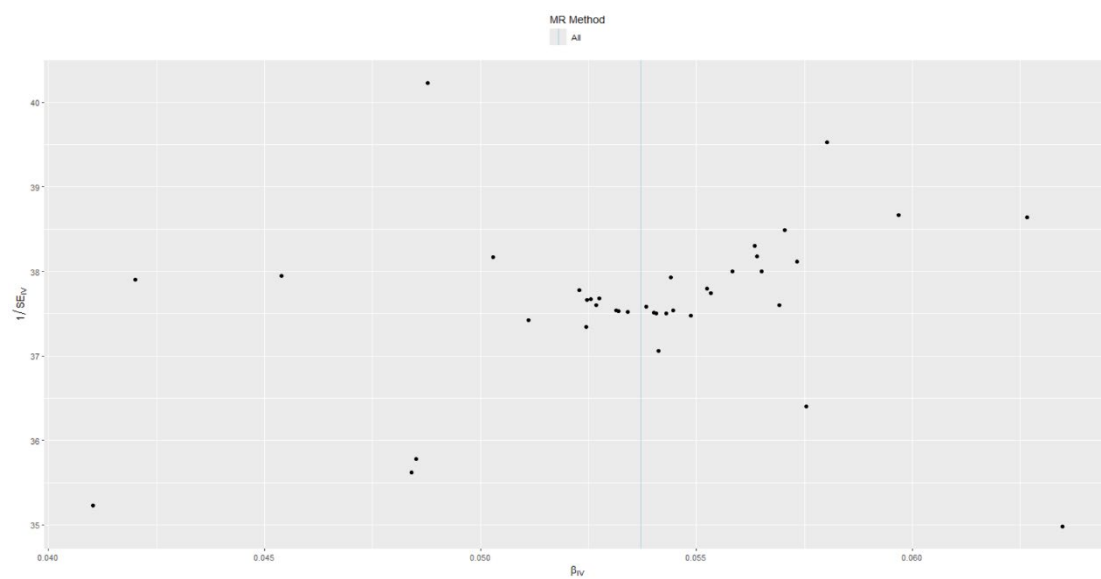

21) Triglycerides to total lipids ratio in medium VLDL and AF

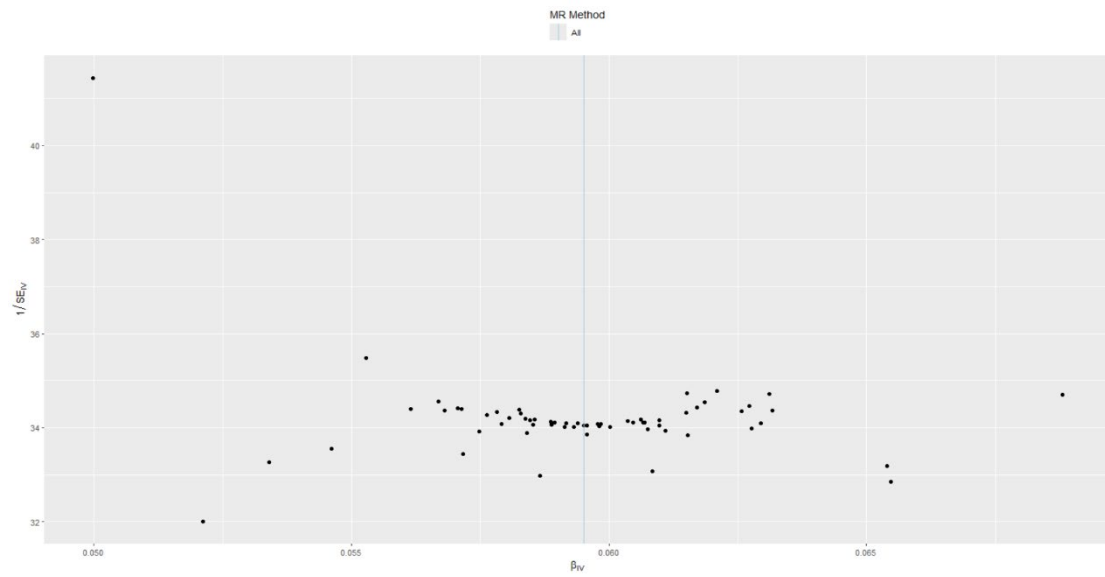

22) Triglycerides to total lipids ratio in small VLDL and AF

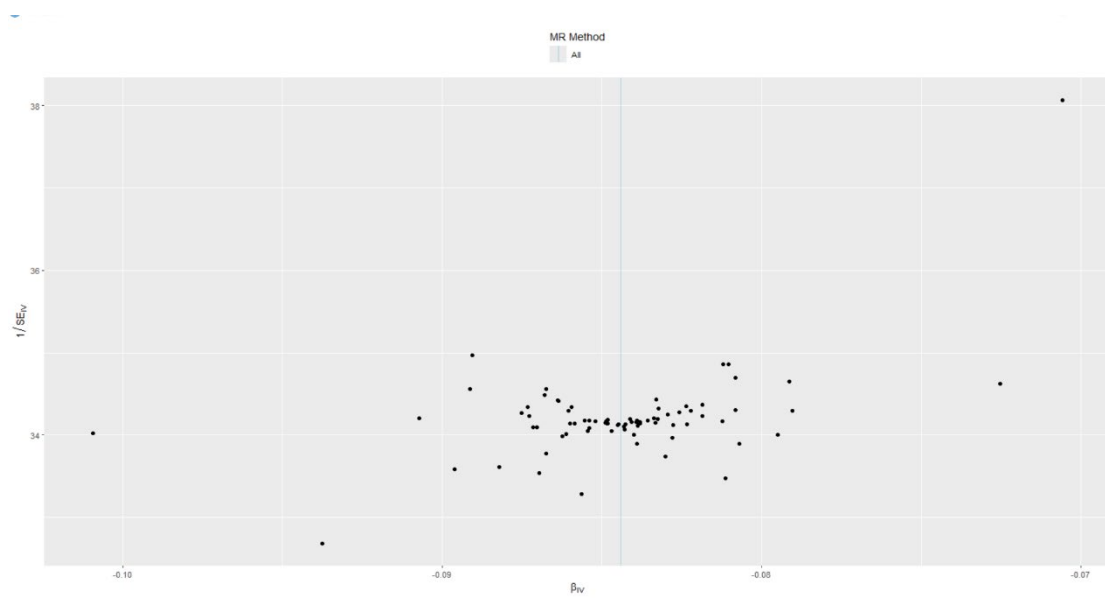

23) Triglycerides to total lipids ratio in large VLDL and AF

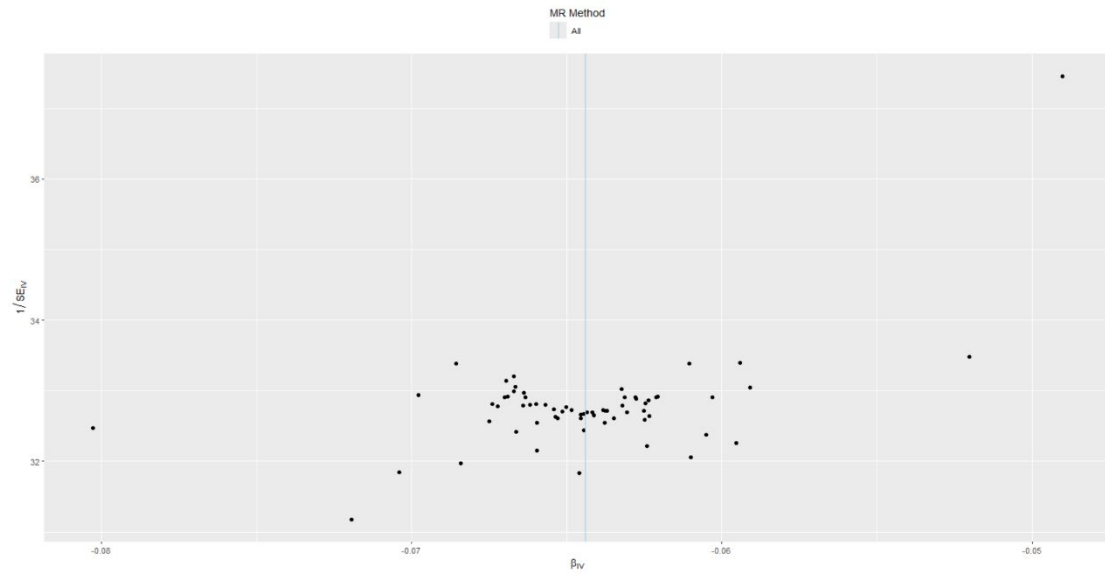

24) Triglycerides to total lipids ratio in very large VLDL and AF

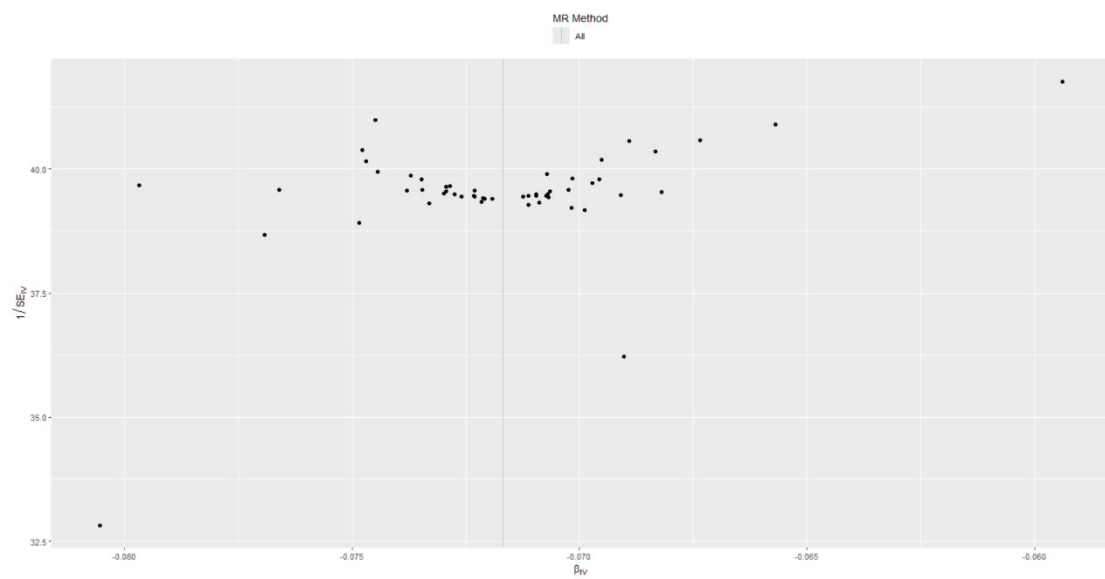

25) Triglycerides in chylomicrons and extremely large VLDL and AF

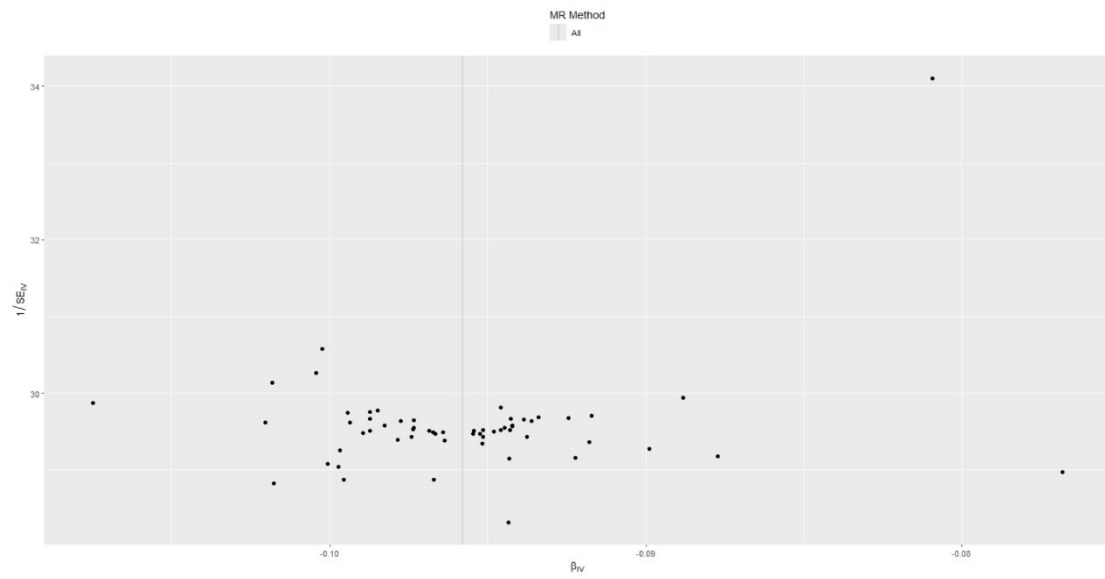

26) Ratio of monounsaturated fatty acids to total fatty acids and AF

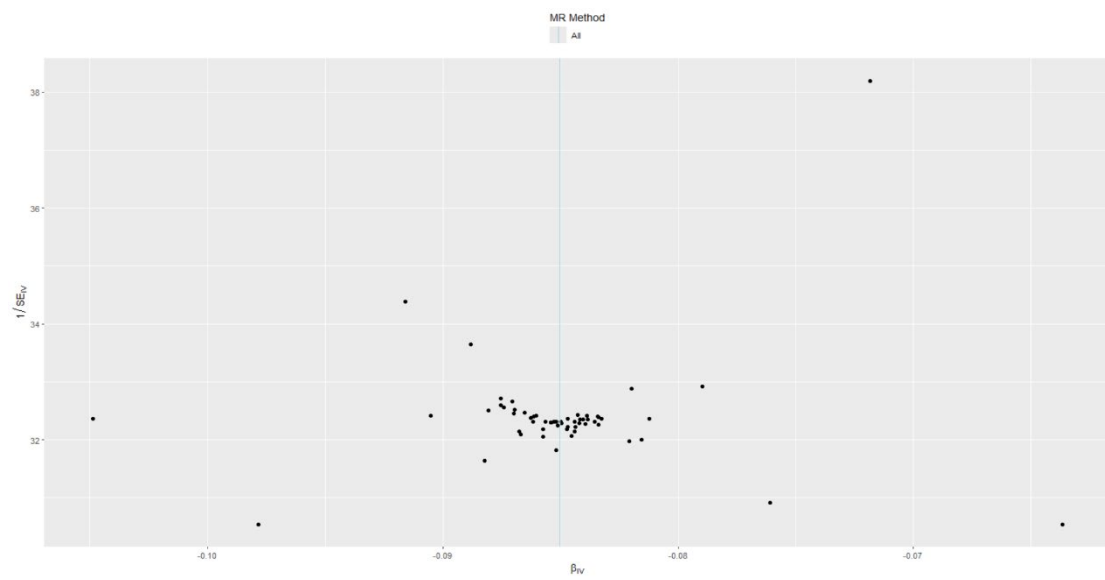

27) Average diameter for VLDL particles and AF

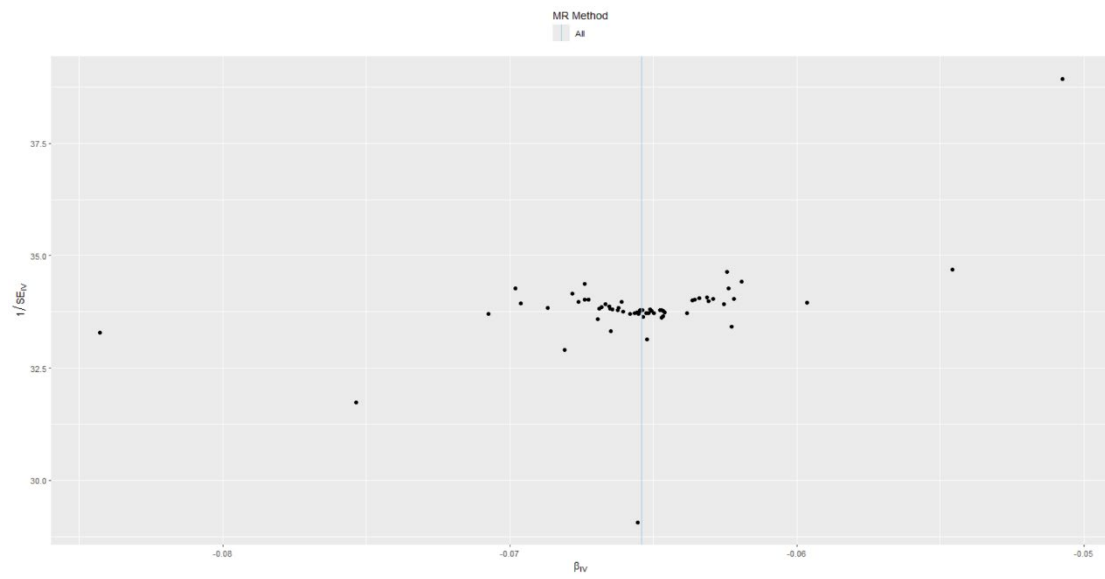

28) Concentration of IDL particles and AF

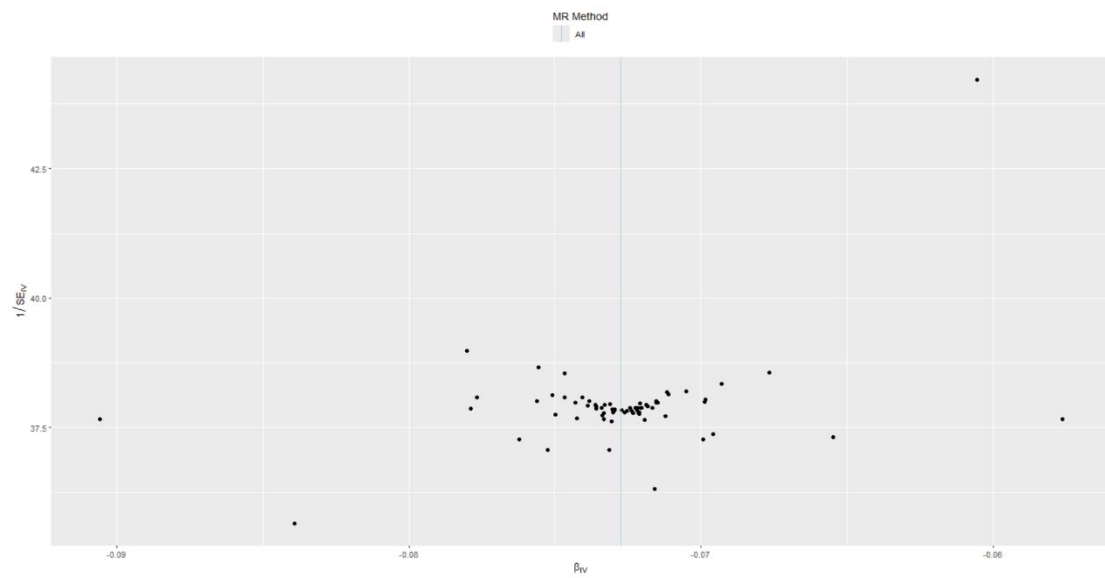

29) Concentration of very small VLDL particles and AF

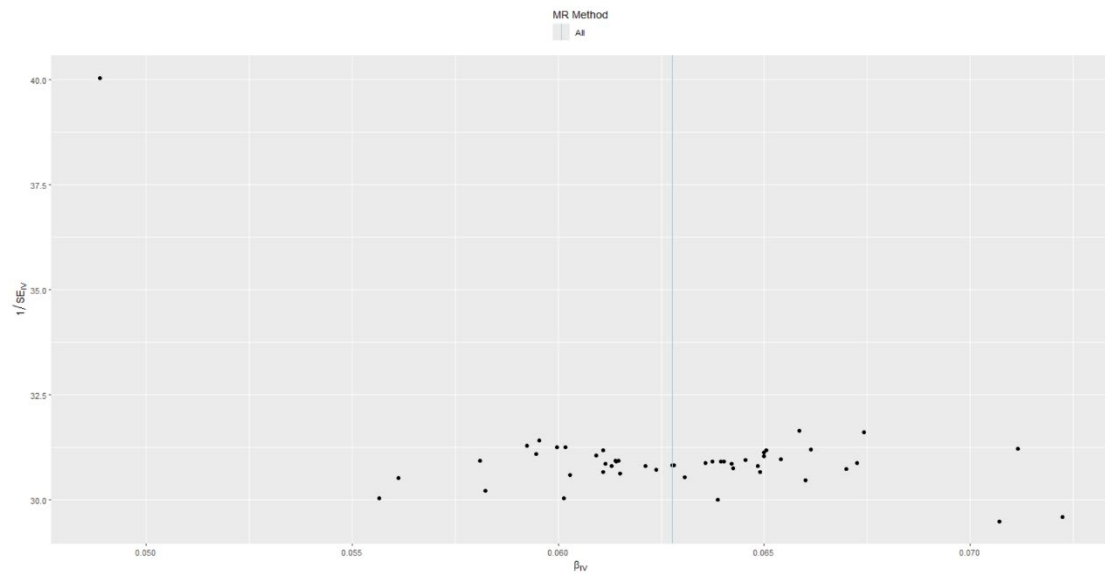

30) Total lipids in chylomicrons and extremely large VLDL and AF

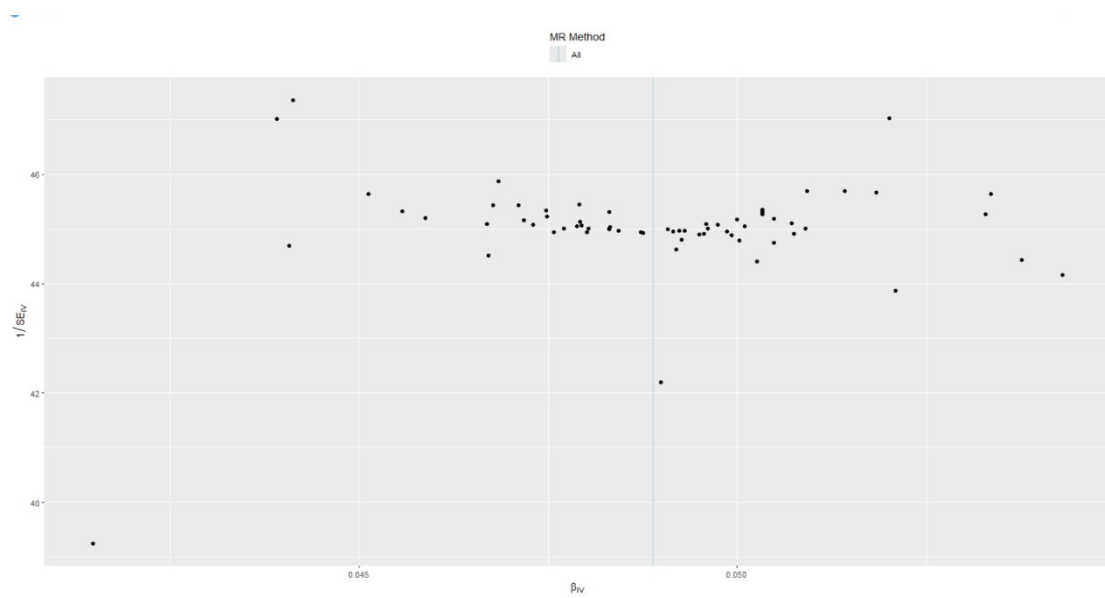

Figure S4 Leave-one-out plot to assess if a single variant is driving the association between lipid traits and atrial fibrillation

1) Cholesterol to total lipids ratio in medium VLDL and AF

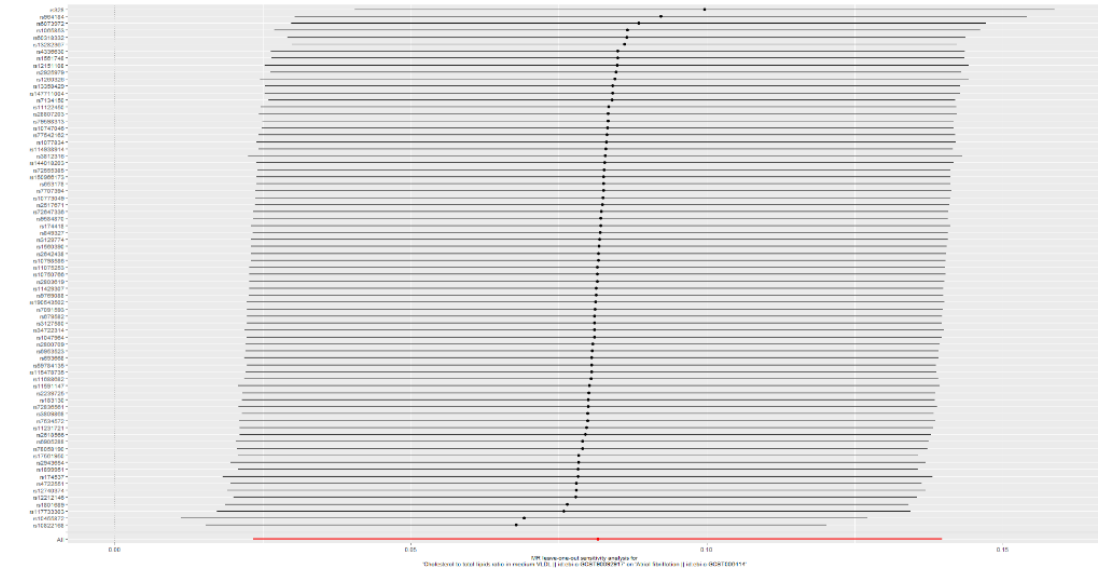

2) Cholesterol to total lipids ratio in small VLDL and AF

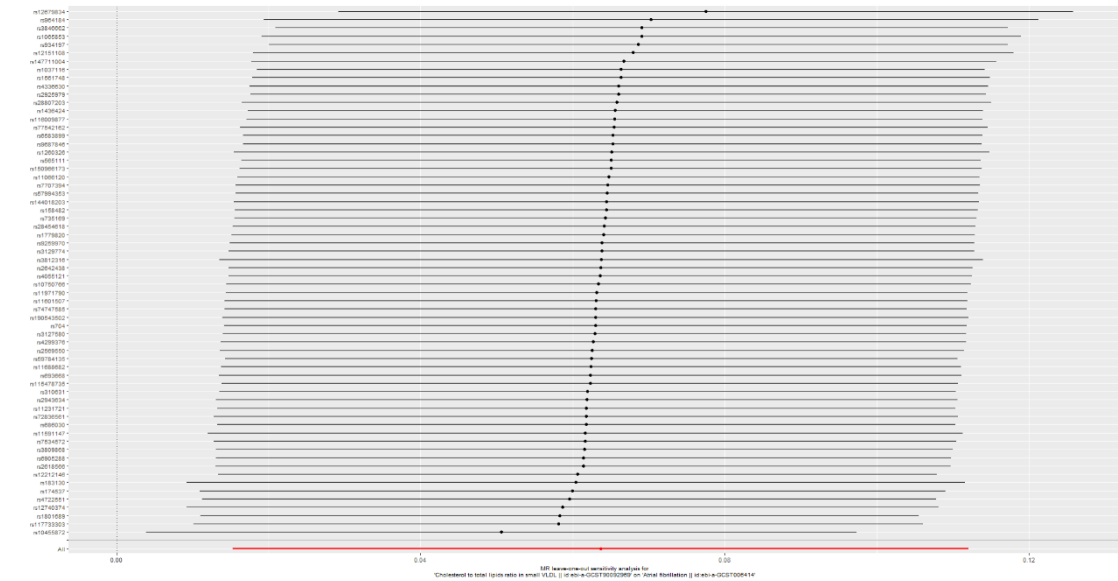

### 3) Cholesterol to total lipids ratio in large VLDL and AF

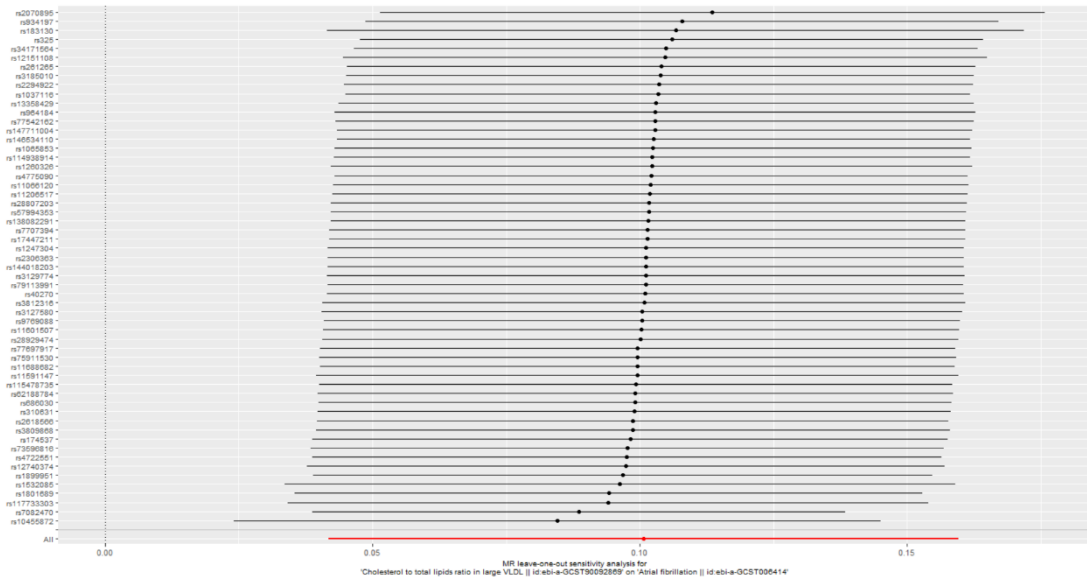

### 4) Cholesterol to total lipids ratio in very large VLDL and AF

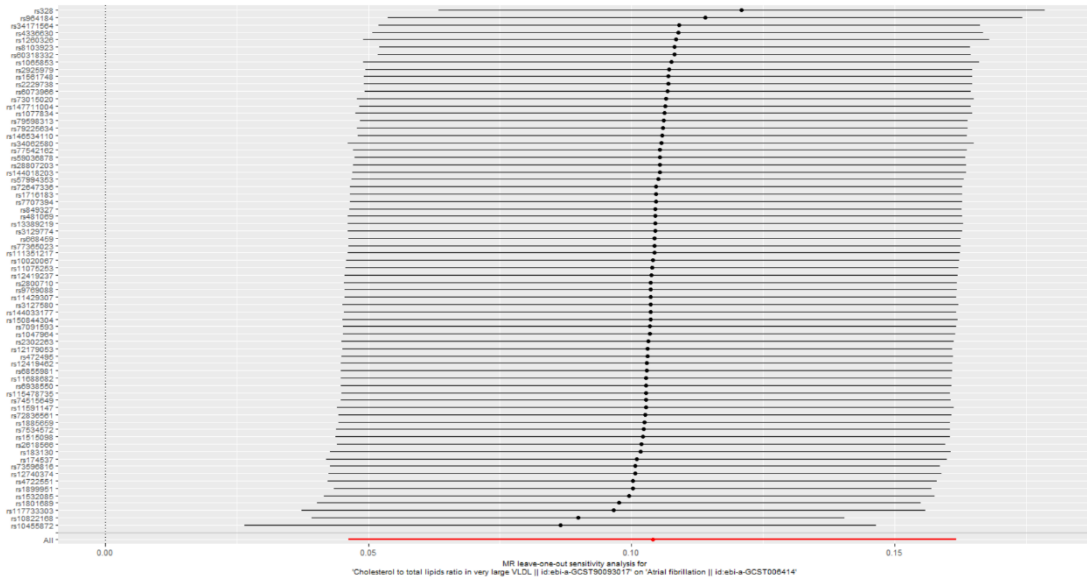

## 5) Cholesterol to total lipids ratio in chylomicrons and extremely large VLDL and AF

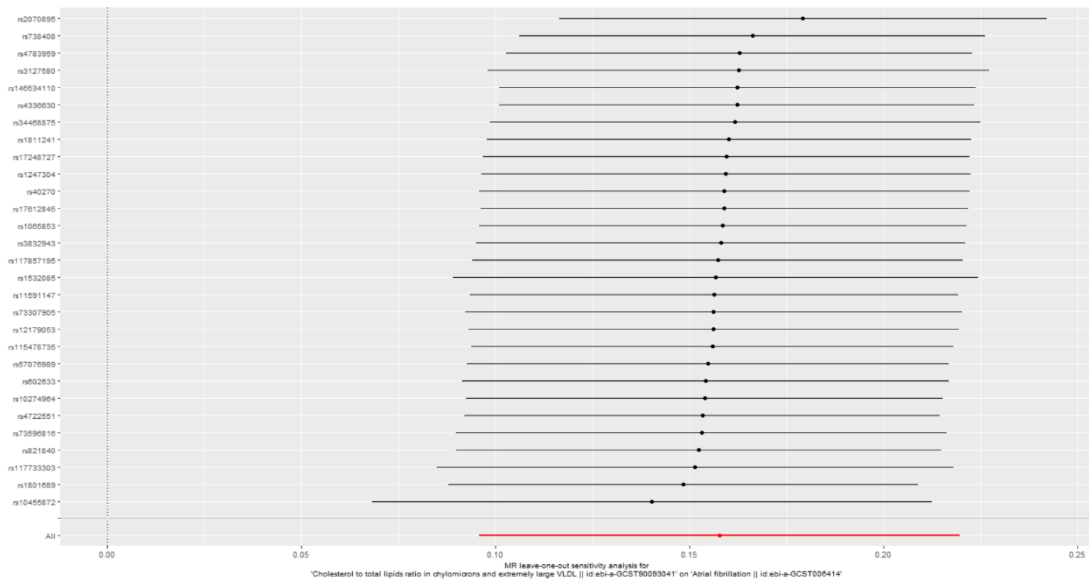

## 6) Cholesterol levels in very small VLDL and AF

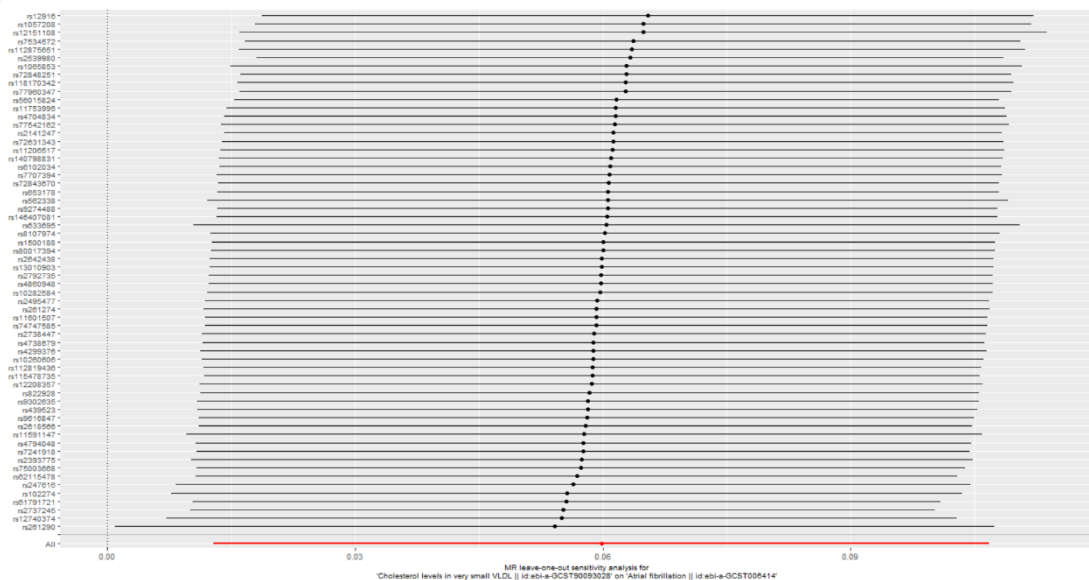

7) Cholesteryl esters to total lipids ratio in medium VLDL and AF

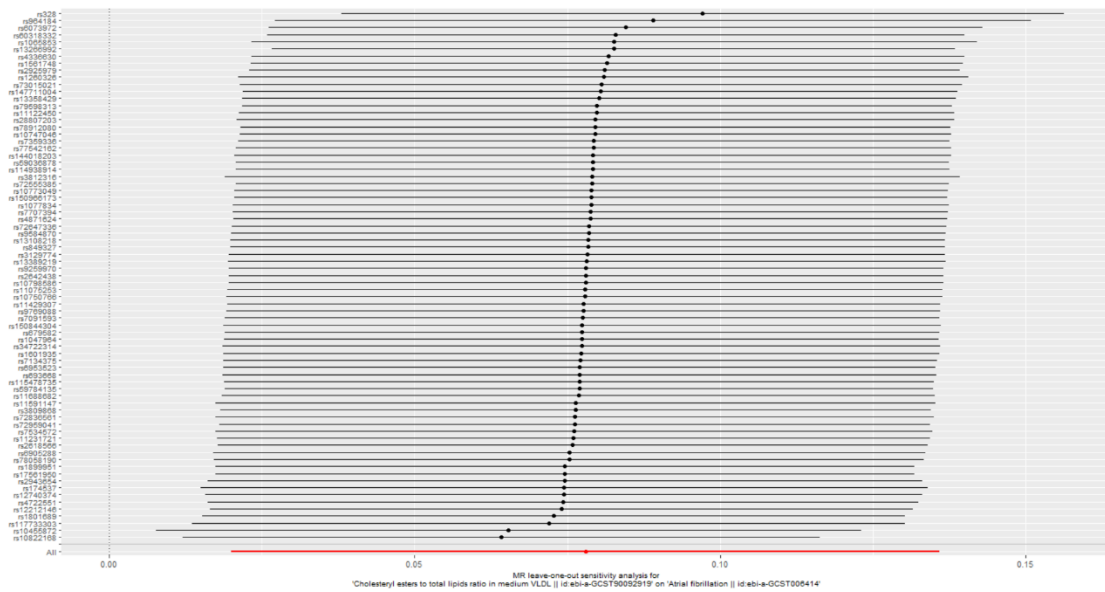

8) Cholesteryl esters to total lipids ratio in small VLDL and AF

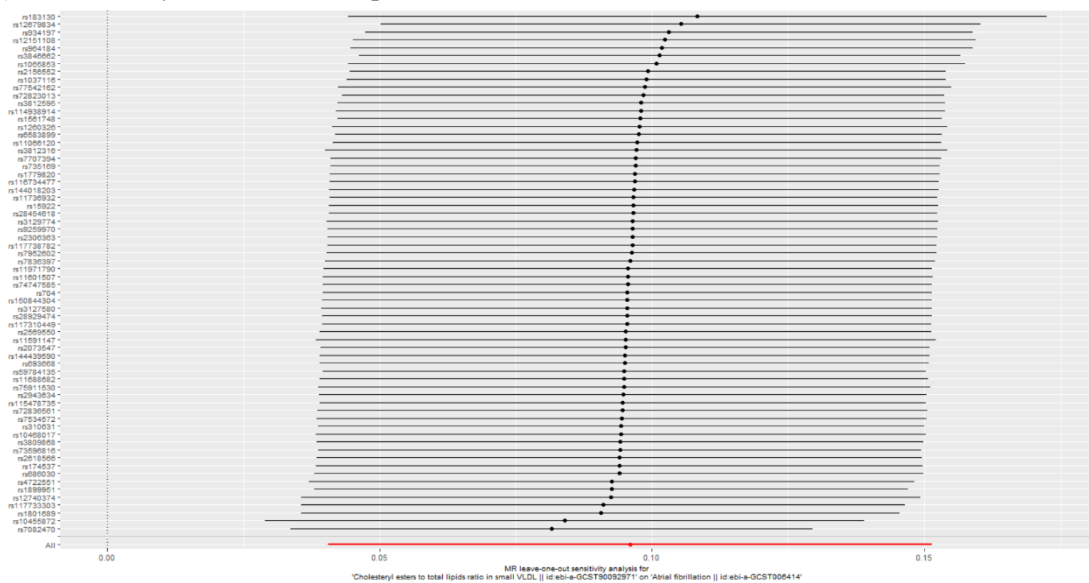

## 9) Cholesteryl esters to total lipids ratio in large VLDL and AF

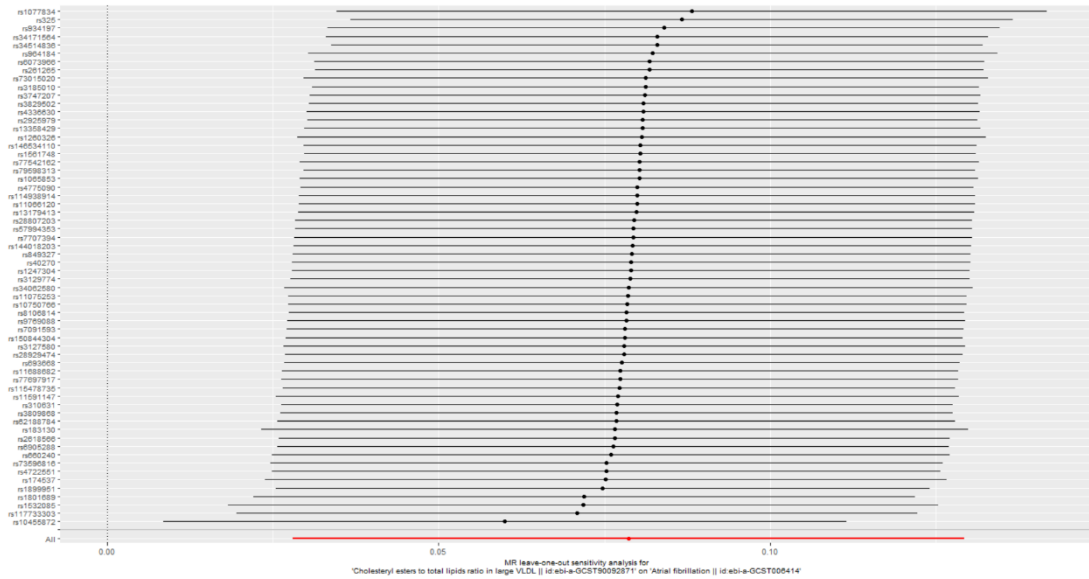

## 10) Cholesteryl esters to total lipids ratio in very large VLDL and AF

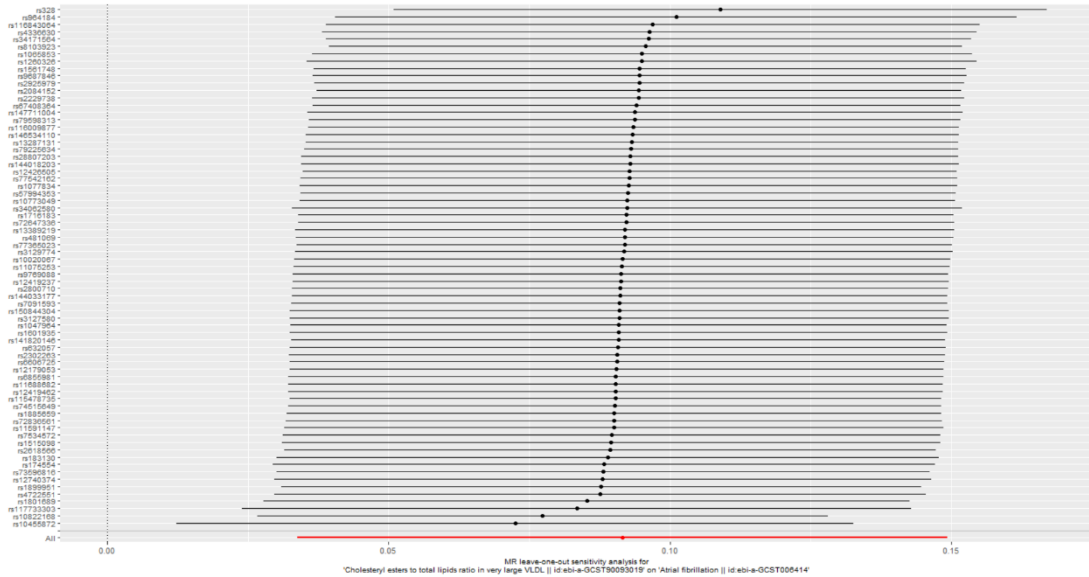

## 11) Cholesteryl esters to total lipids ratio in chylomicrons and extremely large VLDL and AF

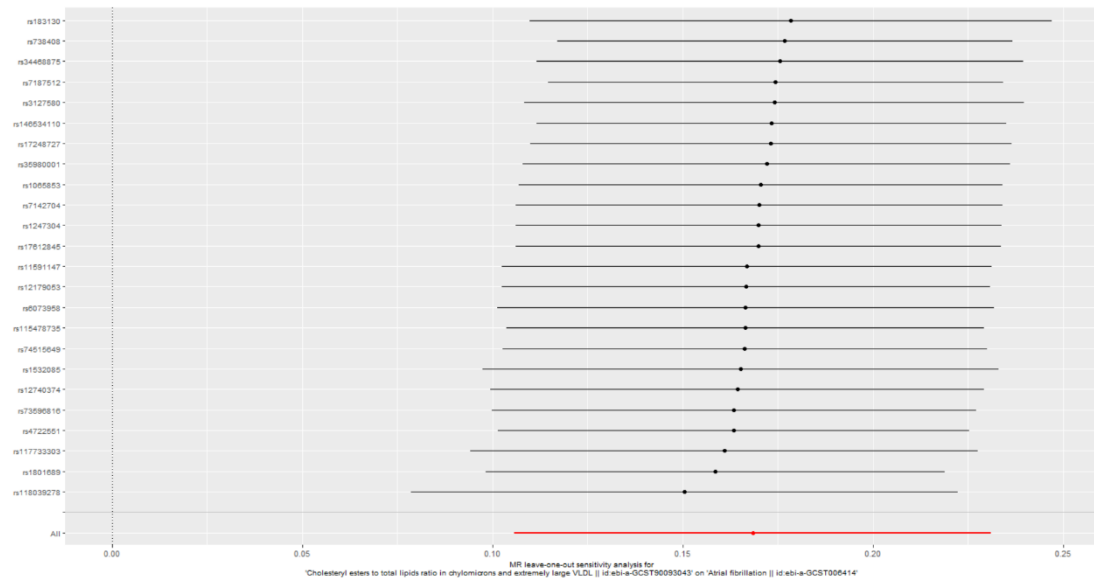

## 12) Cholesteryl esters in very small VLDL and AF

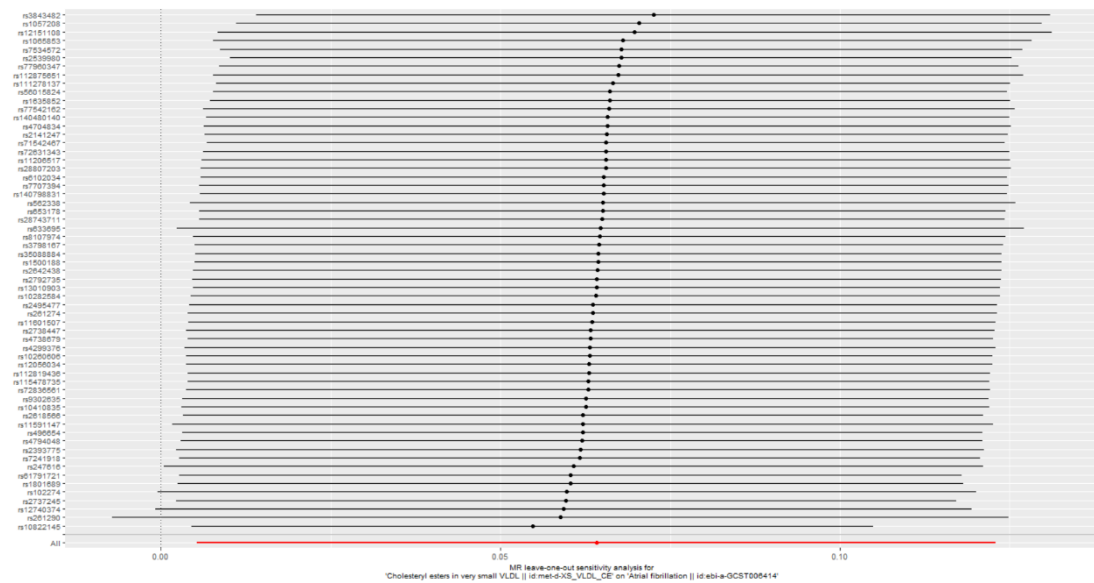

### 13) Free cholesterol to total lipids ratio in medium VLDL and AF

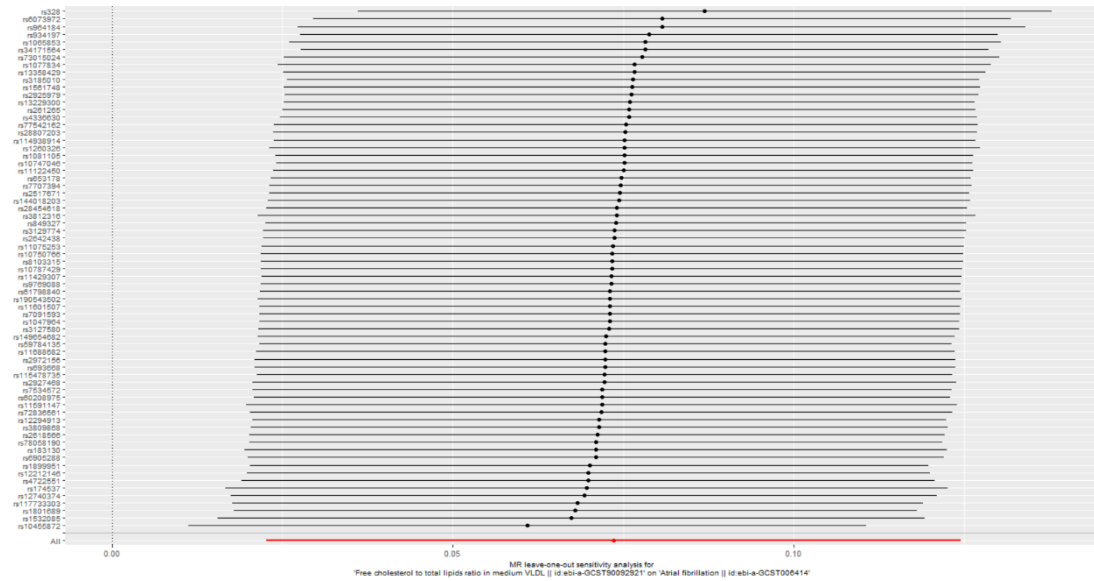

### 14) Free cholesterol to total lipids ratio in large VLDL and AF

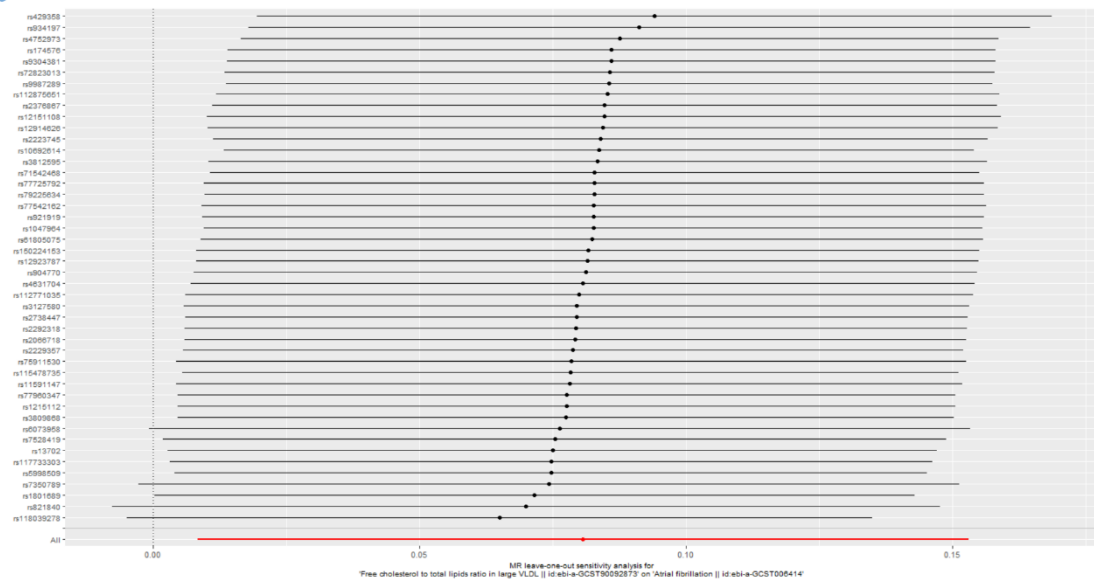

### 15) Free cholesterol to total lipids ratio in very large VLDL and AF

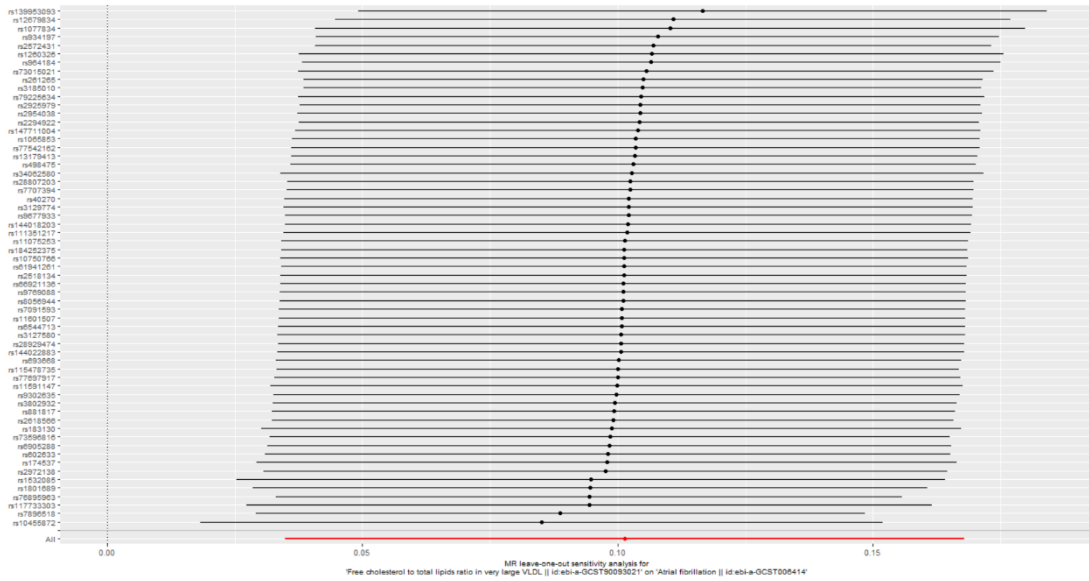

### 16) Free cholesterol to total lipids ratio in chylomicrons and extremely large VLDL and AF

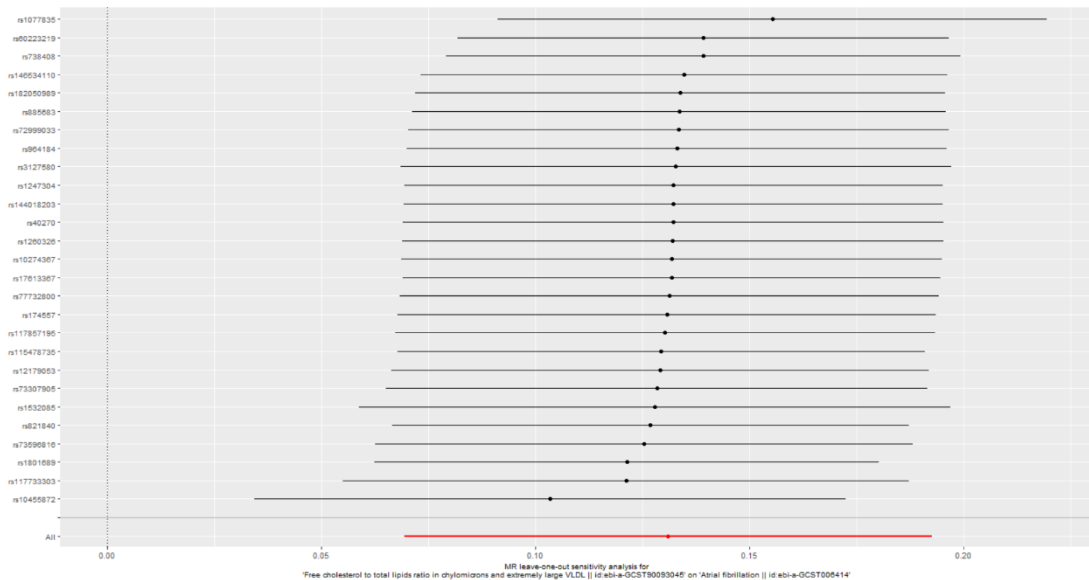

## 17) Free cholesterol levels in very small VLDL and AF

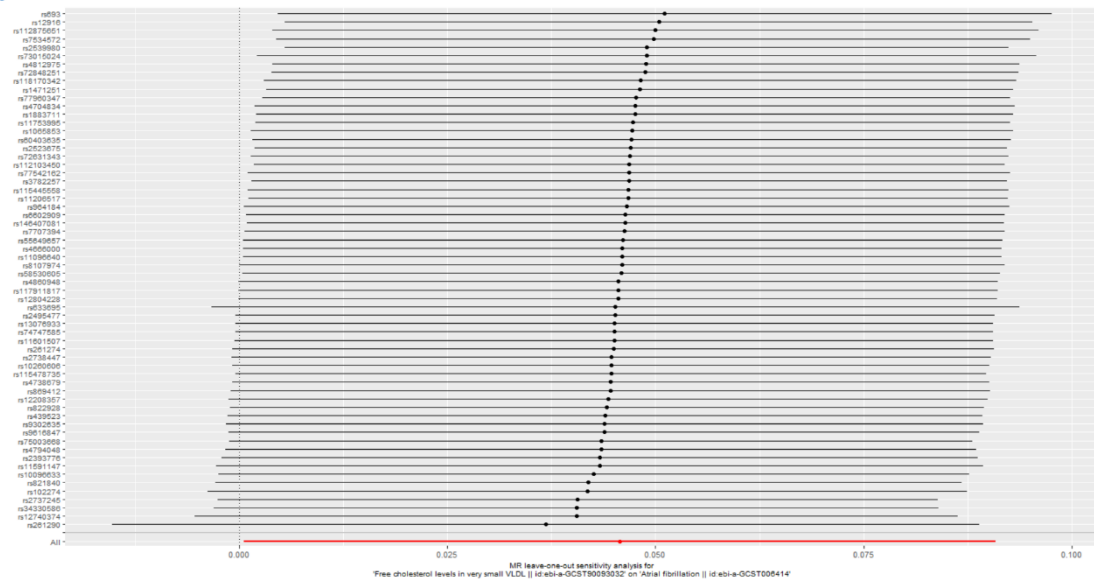

## 18) Phospholipids to total lipids ratio in medium VLDL and AF

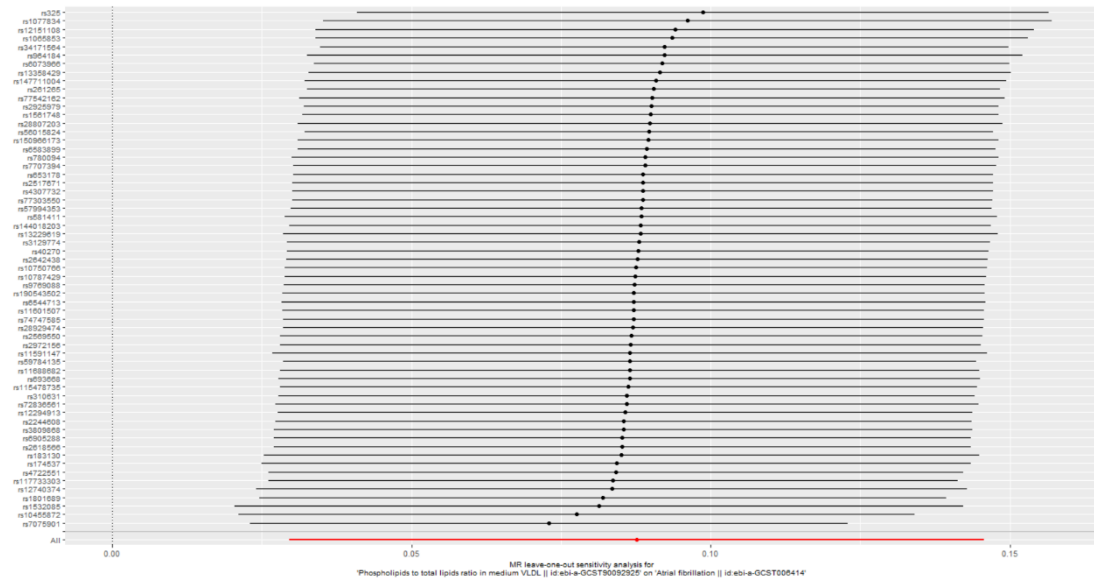

## 19) Phospholipids to total lipids ratio in chylomicrons and extremely large VLDL and AF

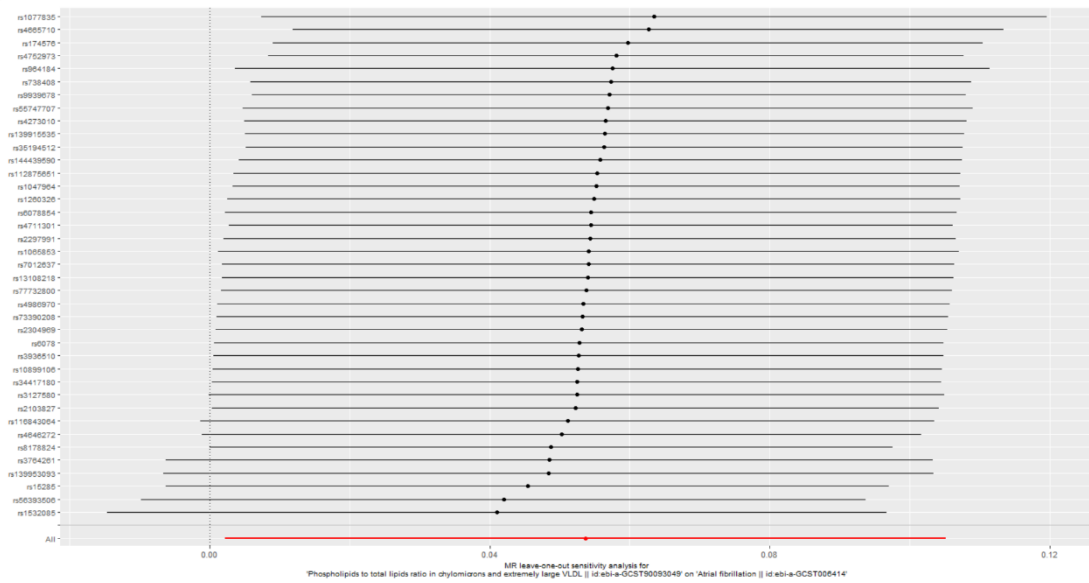

## 20) Phospholipids in IDL and AF

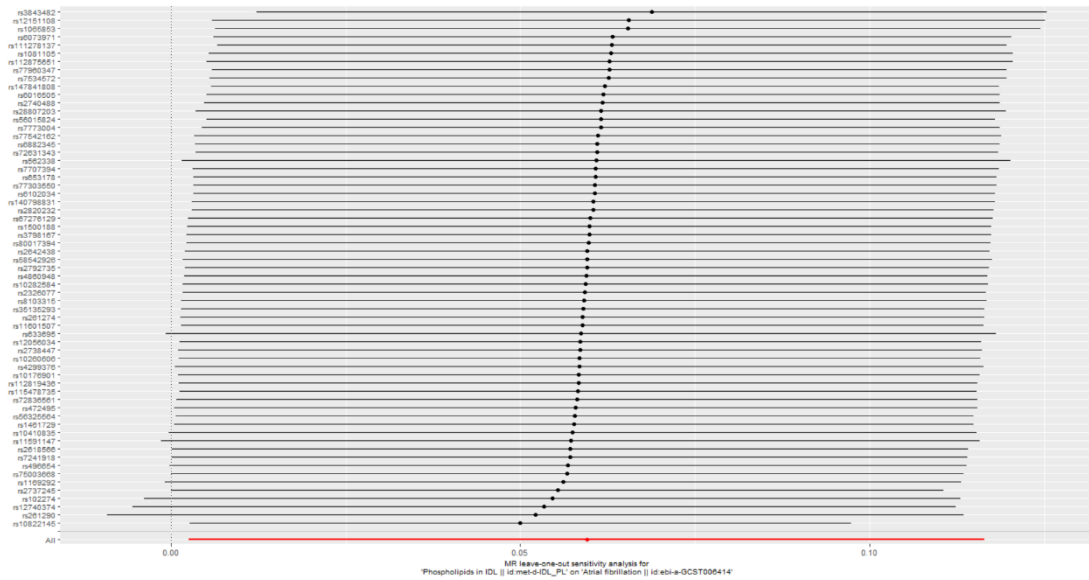

## 21) Triglycerides to total lipids ratio in medium VLDL and AF

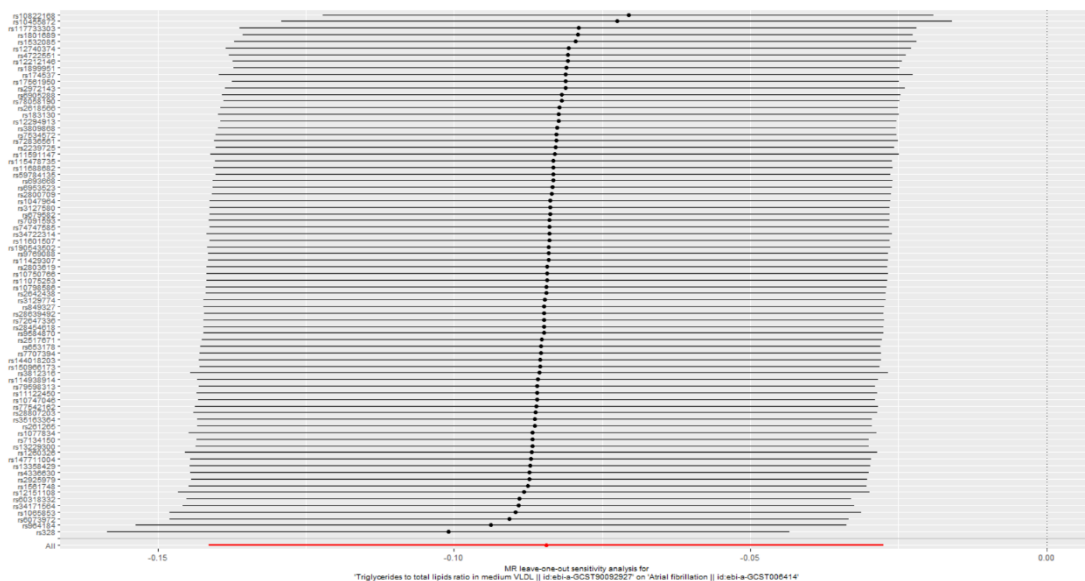

## 22) Triglycerides to total lipids ratio in small VLDL and AF

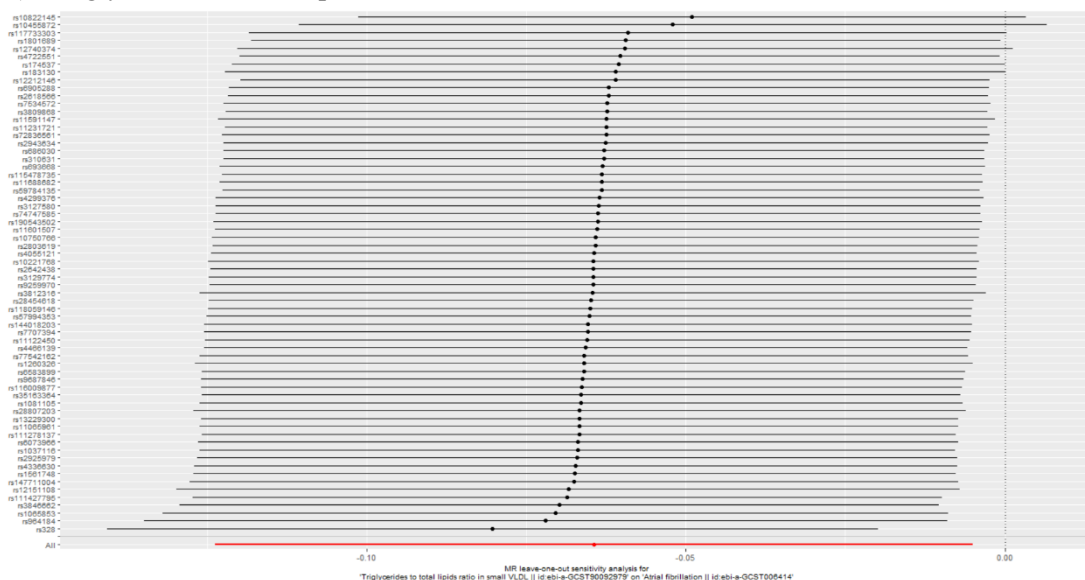

### 23) Triglycerides to total lipids ratio in large VLDL and AF

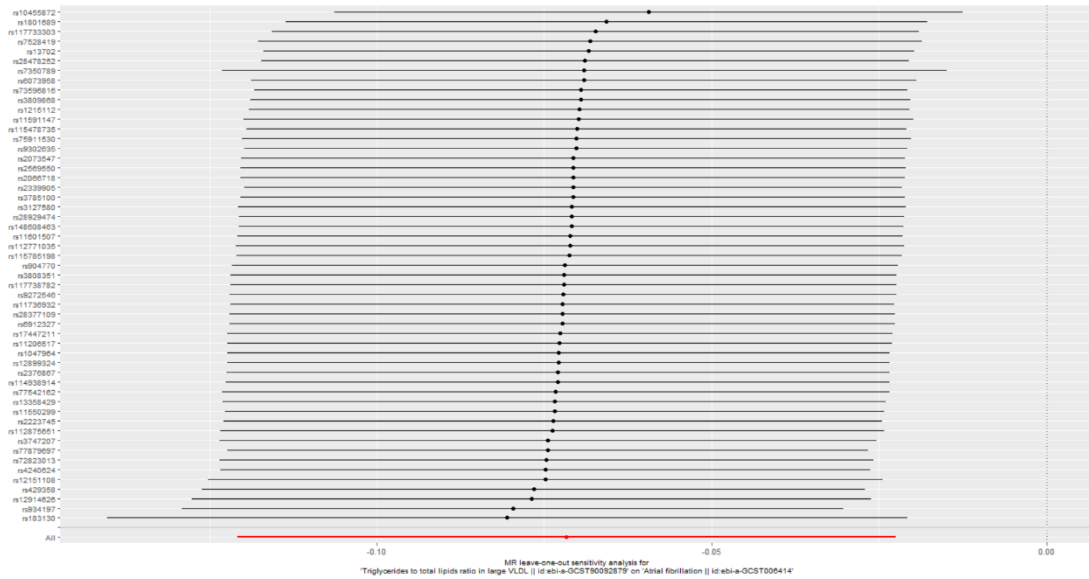

### 24) Triglycerides to total lipids ratio in very large VLDL and AF

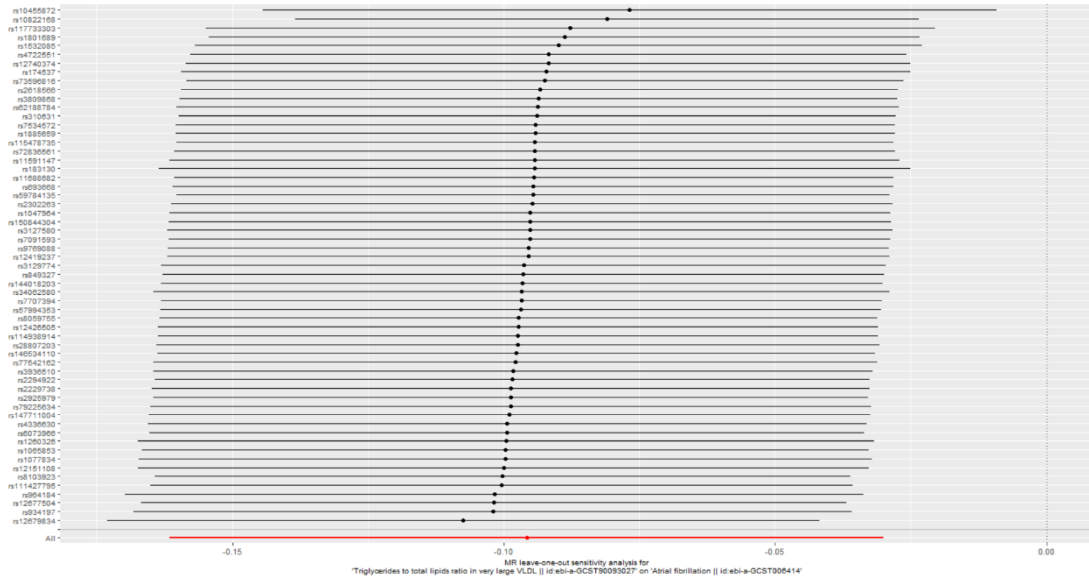

## 25) Triglycerides in chylomicrons and extremely large VLDL and AF

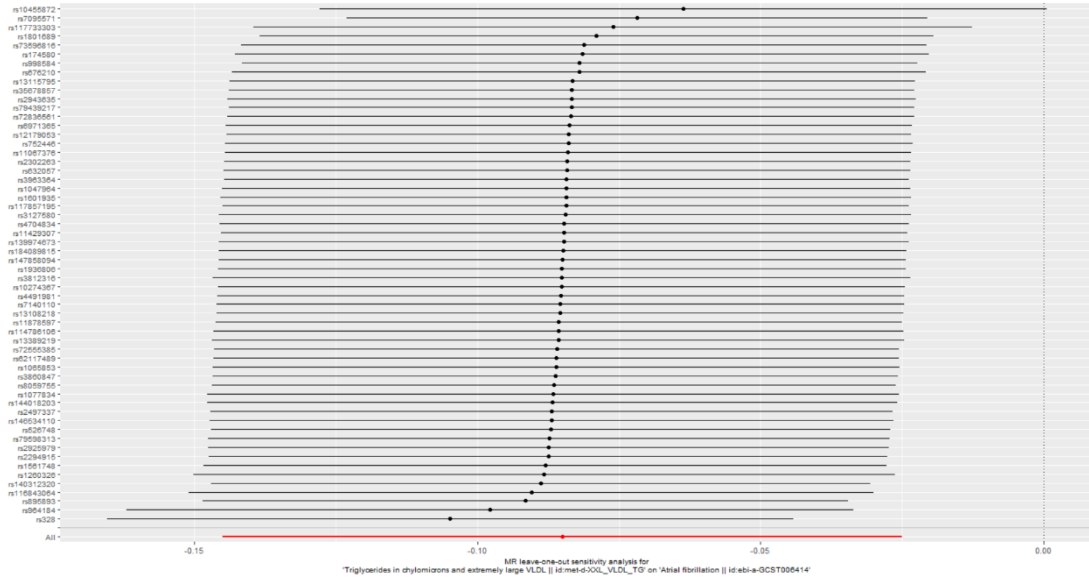

## 26) Ratio of monounsaturated fatty acids to total fatty acids and AF

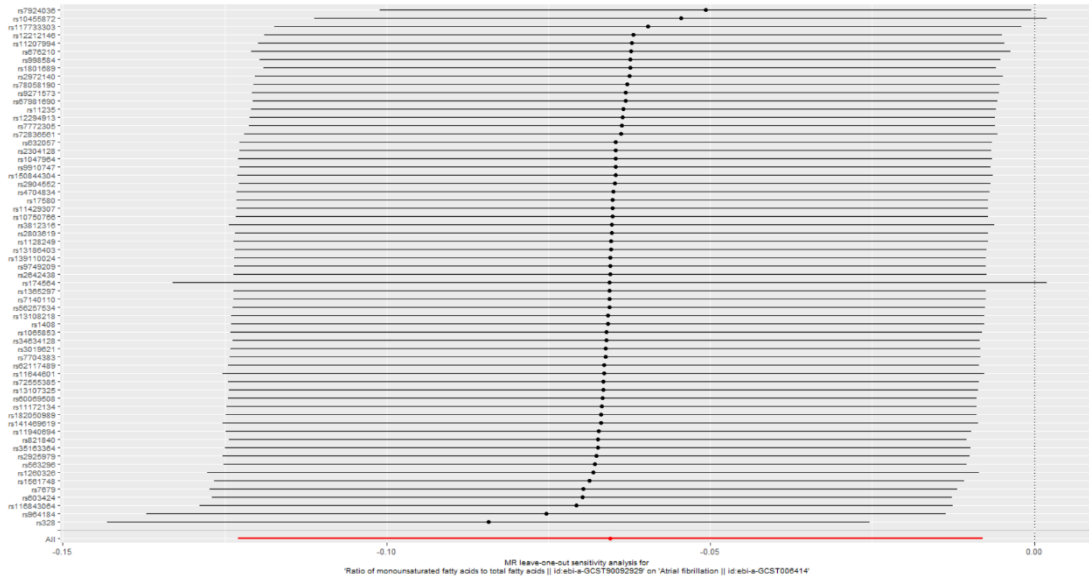

## 27) Average diameter for VLDL particles and AF

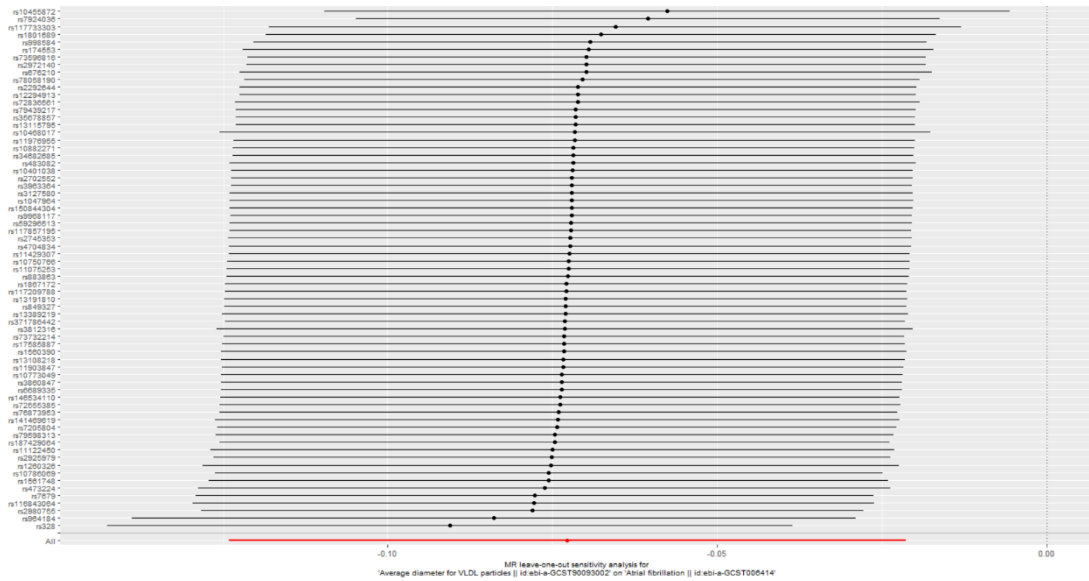

## 28) Concentration of IDL particles and AF

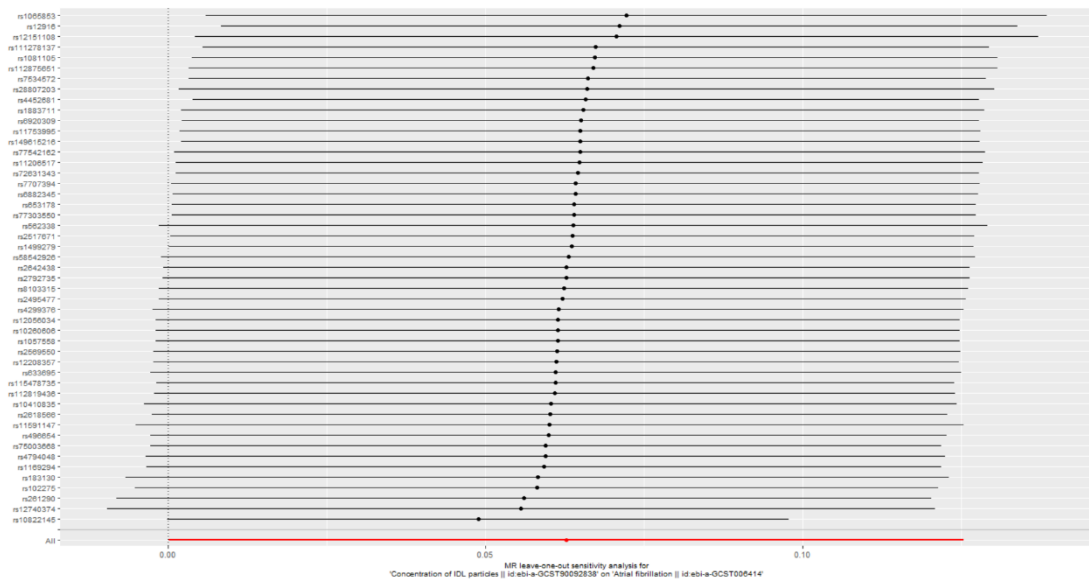

## 29) Concentration of very small VLDL particles and AF

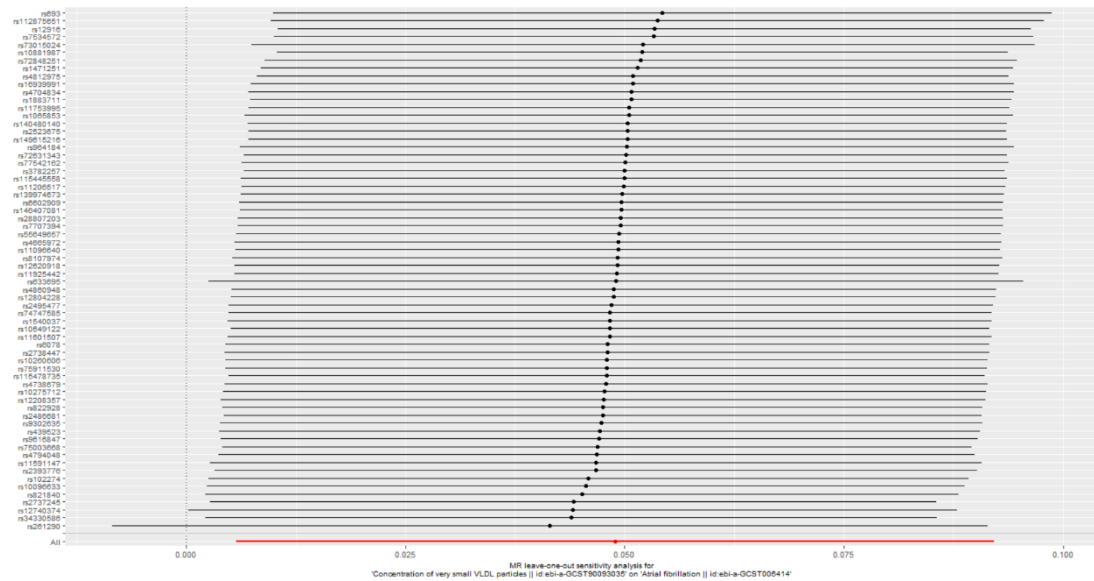

## 30) Total lipids in chylomicrons and extremely large VLDL and AF

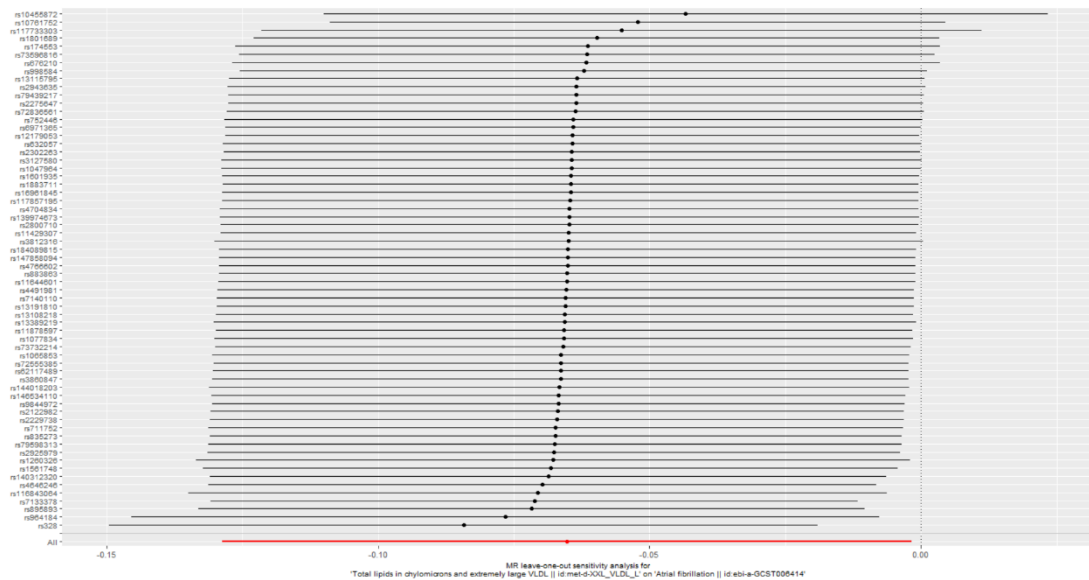

Figure S5 Scatter plot of MR effect size for causal associations between lipid traits and atrial fibrillation/Flutter

1) Cholesterol to total lipids ratio in small VLDL

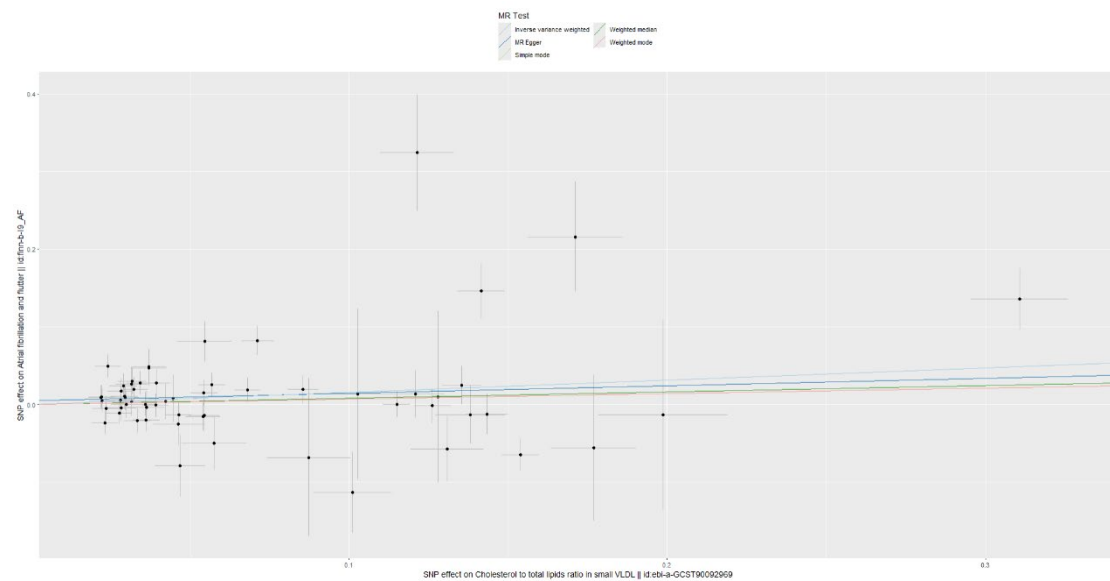

2) Cholesterol to total lipids ratio in very large VLDL

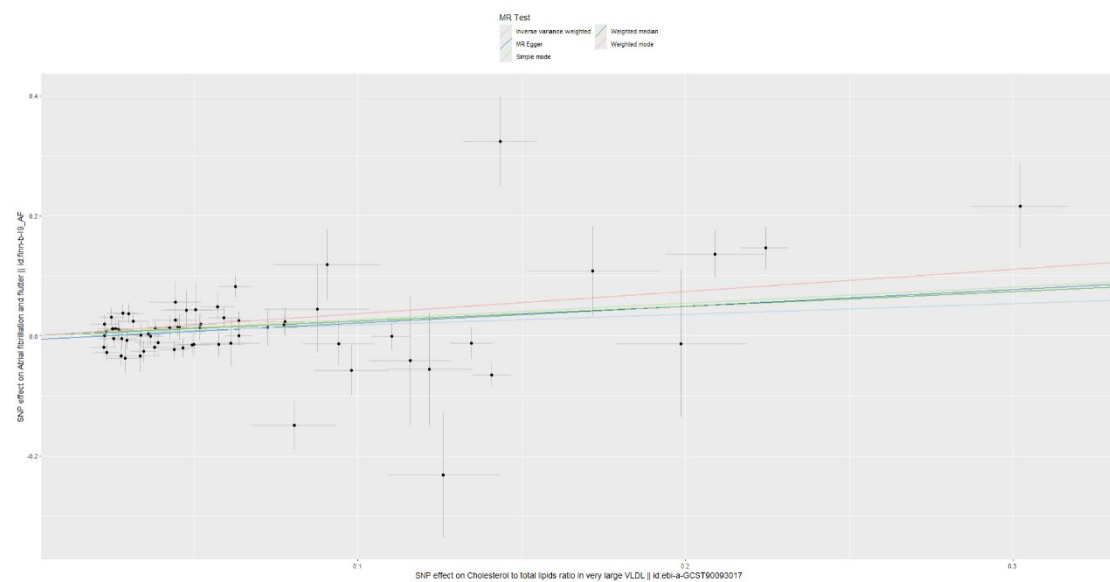

### 3) Cholesterol levels in very small VLDL

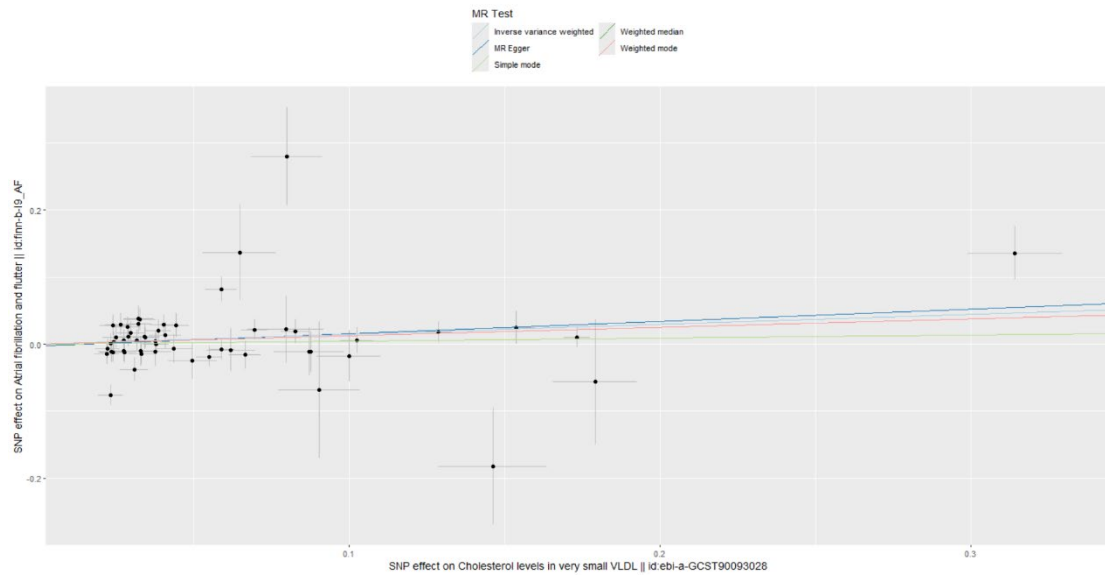

### 4) Cholesteryl esters to total lipids ratio in small VLDL

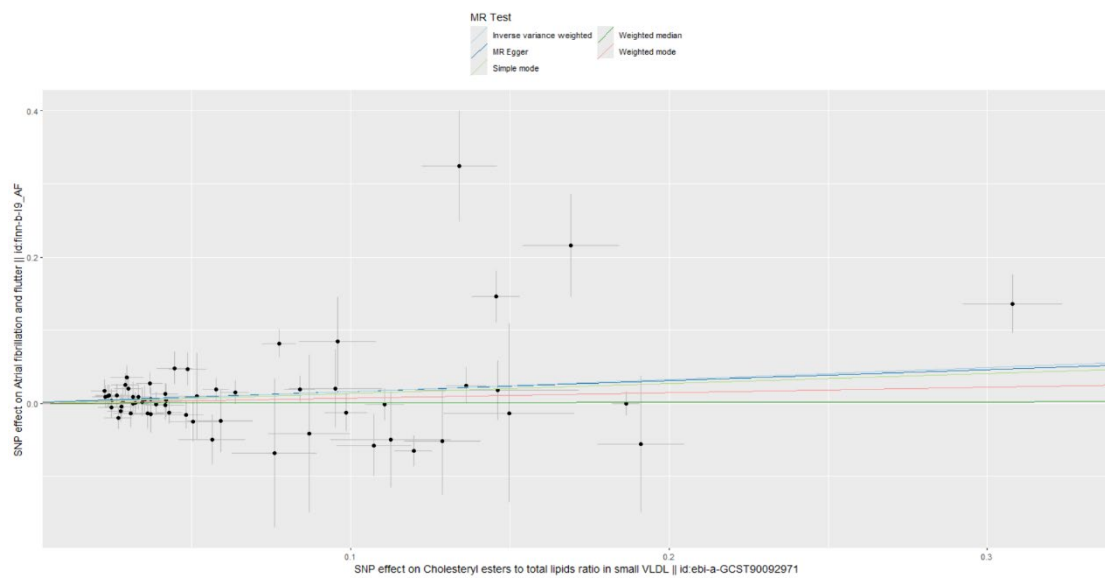

## 5) Cholesteryl esters to total lipids ratio in very large VLDL

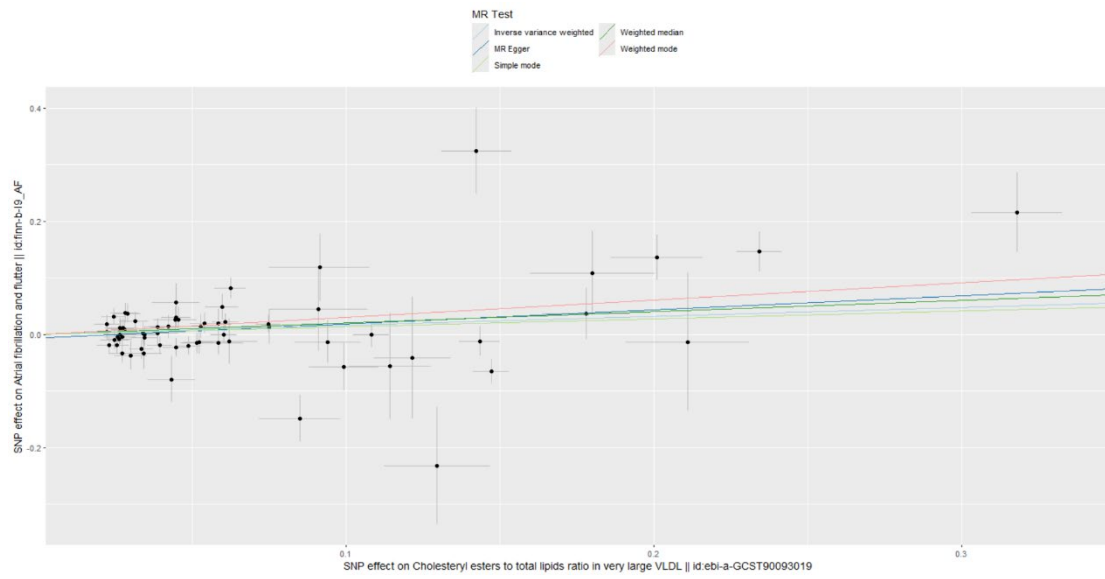

## 6) Cholesteryl esters in very small VLDL

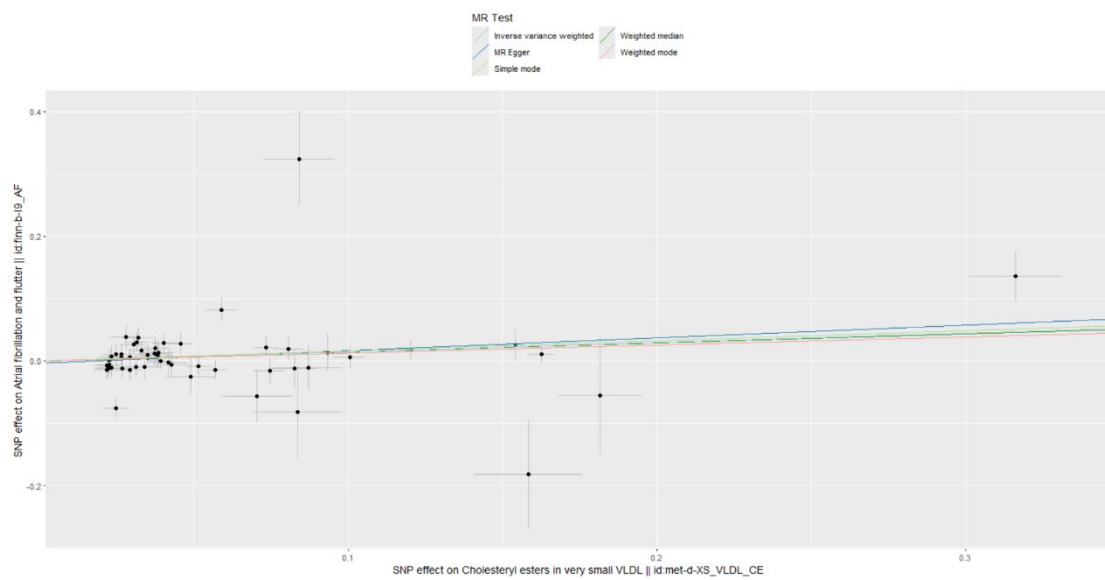

## 7) Free cholesterol to total lipids ratio in large VLDL

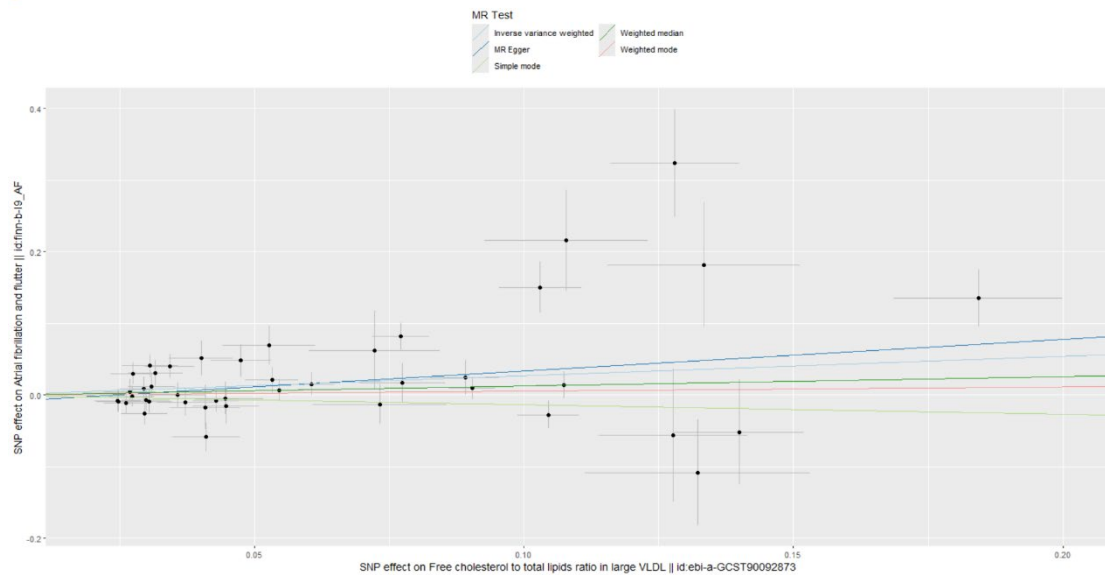

## 8) Free cholesterol to total lipids ratio in very large VLDL

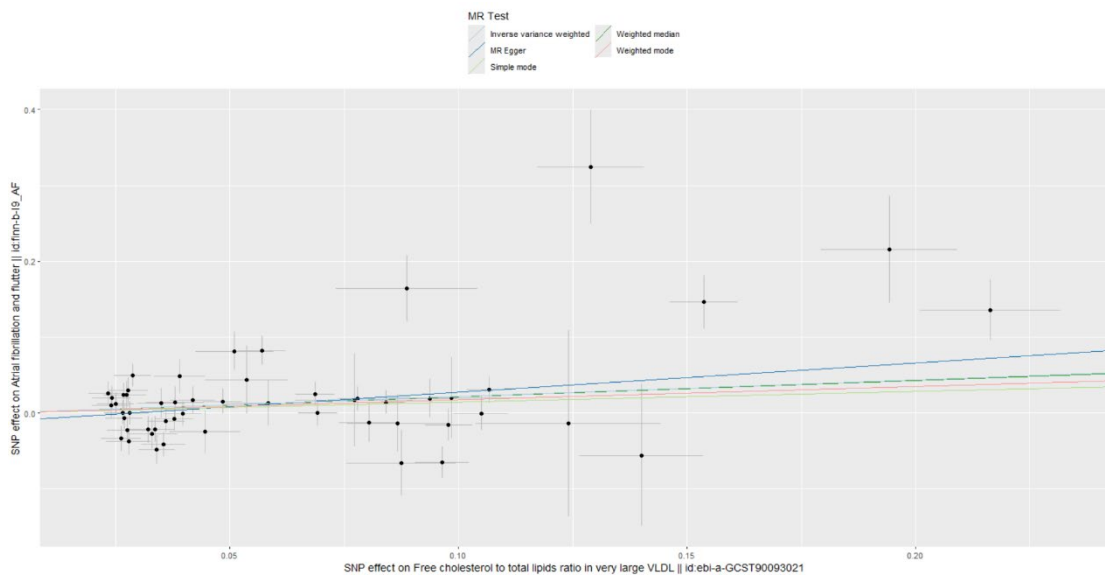

## 9) Free cholesterol to total lipids ratio in chylomicrons and extremely large VLDL

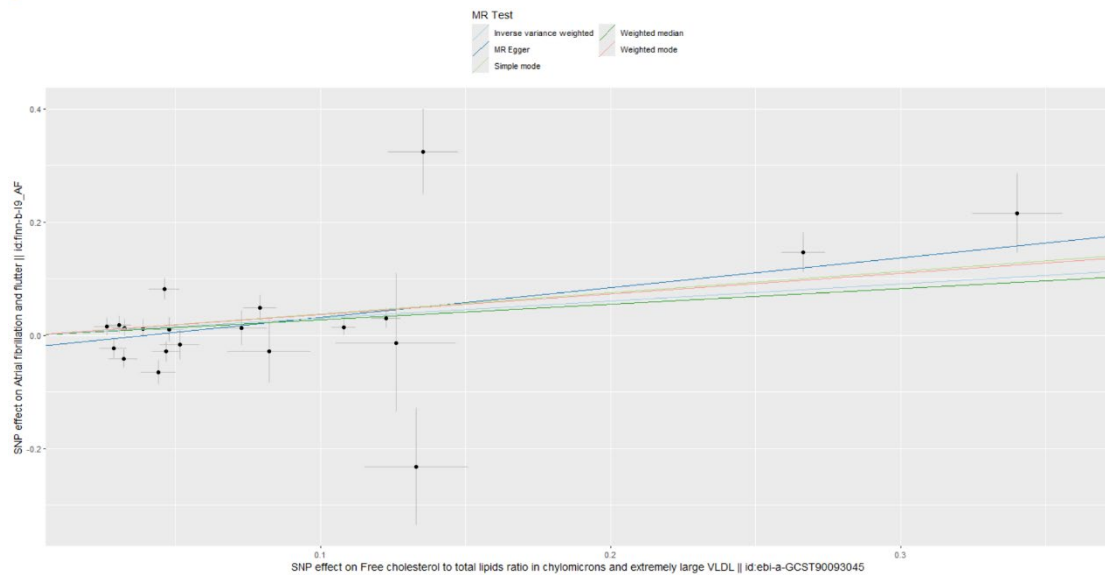

## 10) Free cholesterol levels in very small VLDL

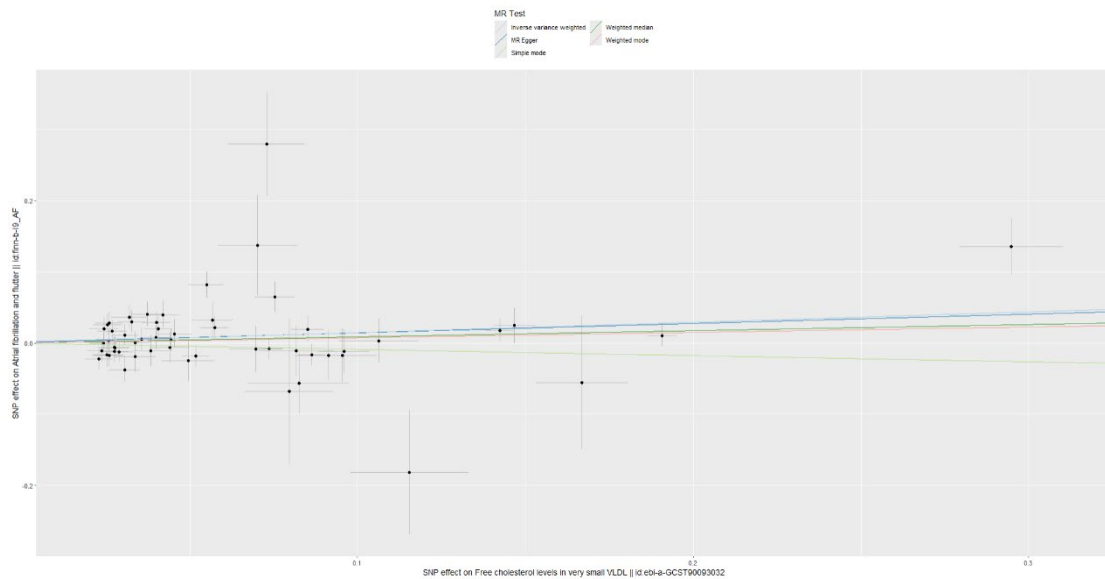

11) Phospholipids to total lipids ratio in medium VLDL

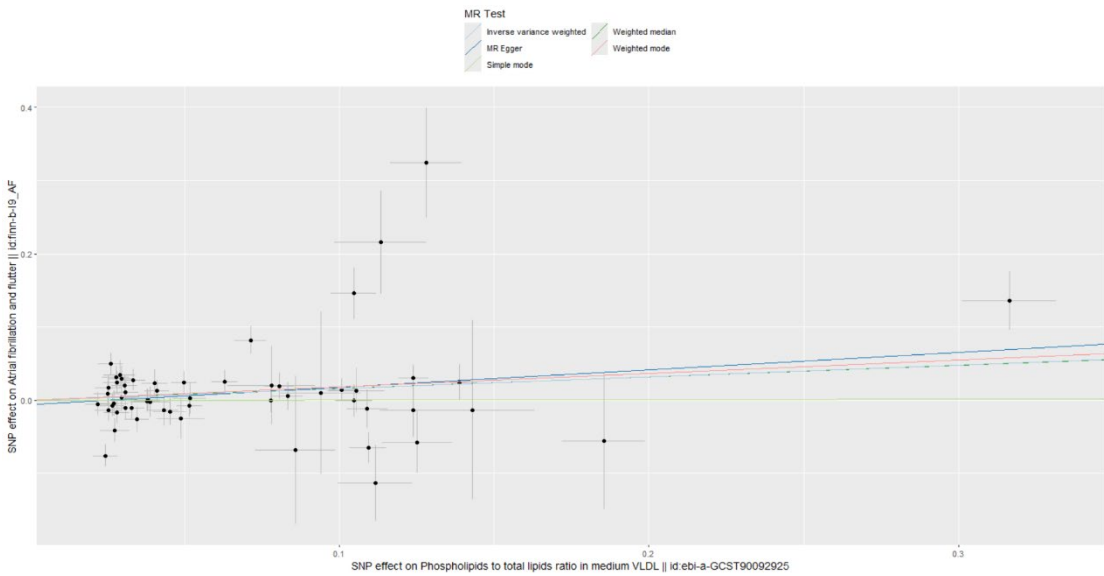

12) Phospholipids to total lipids ratio in chylomicrons and extremely large VLDL

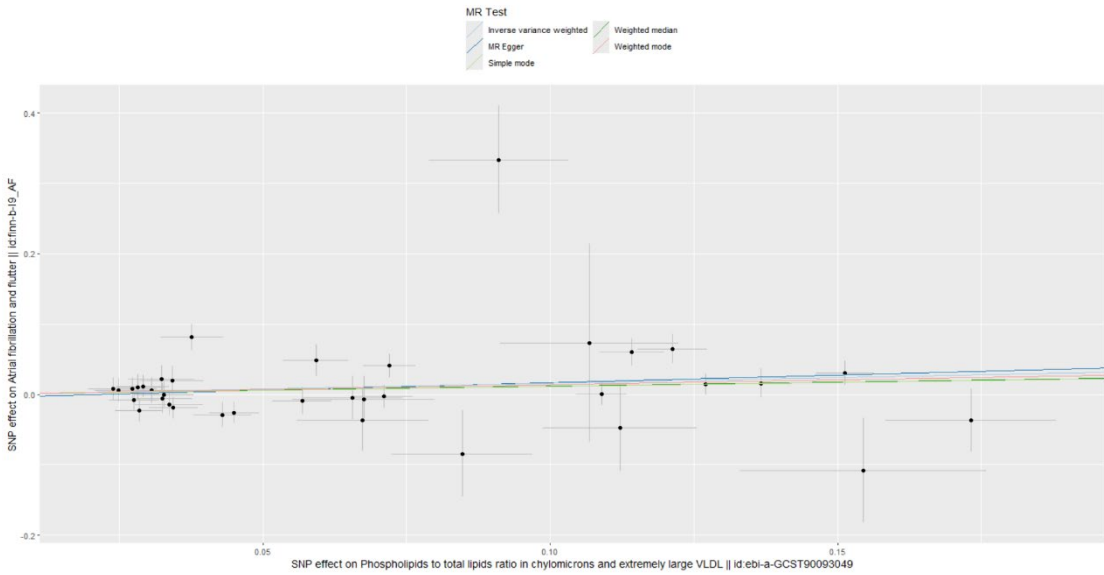

13) Phospholipids in IDL

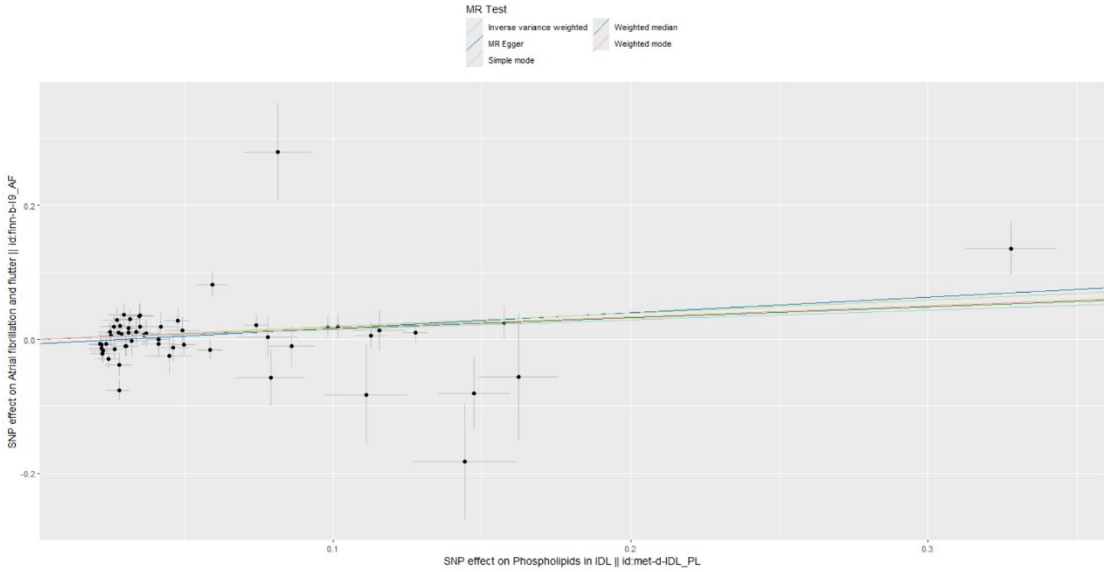

14) Triglycerides to total lipids ratio in large VLDL

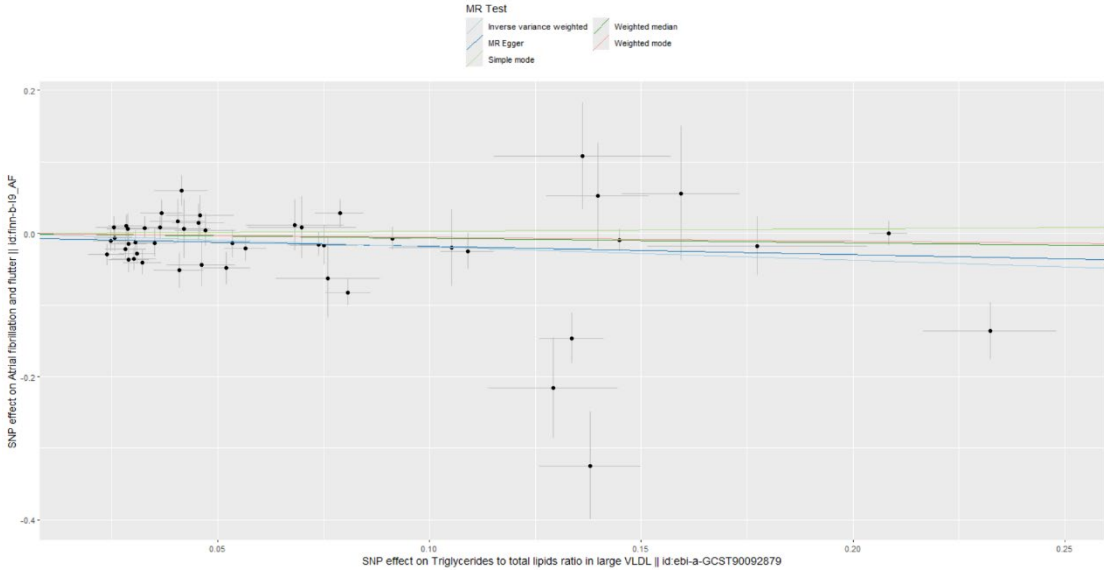

15) Triglycerides to total lipids ratio in very large VLDL

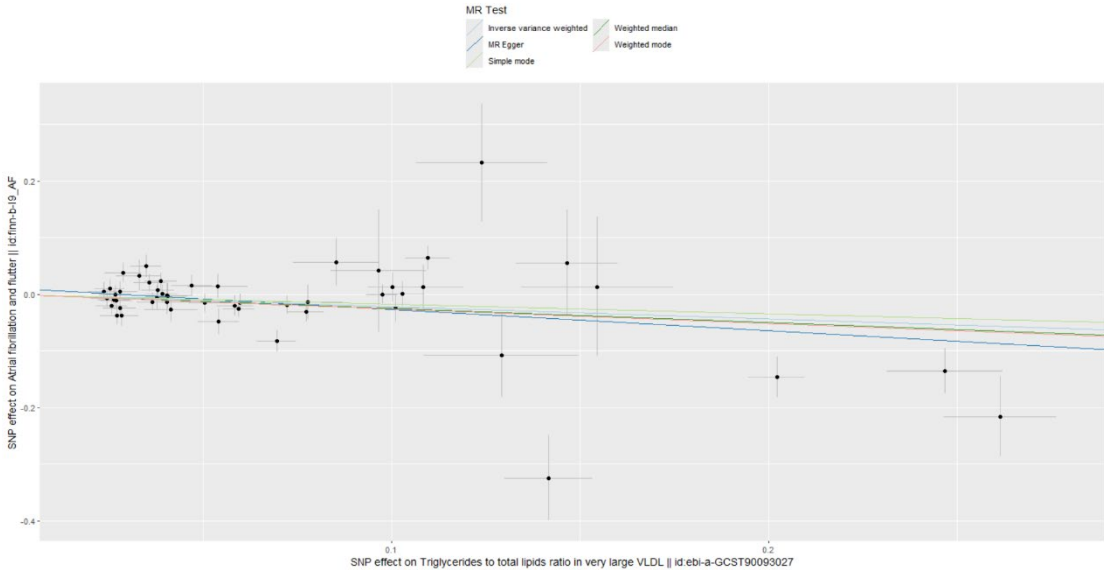

16) Concentration of IDL particles

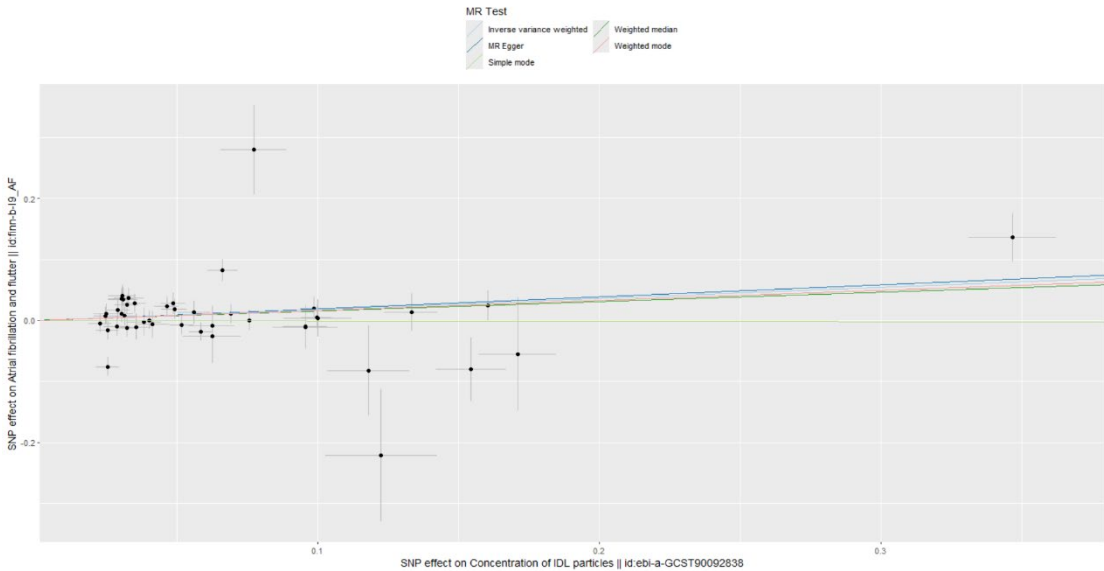

17) Concentration of very small VLDL particles

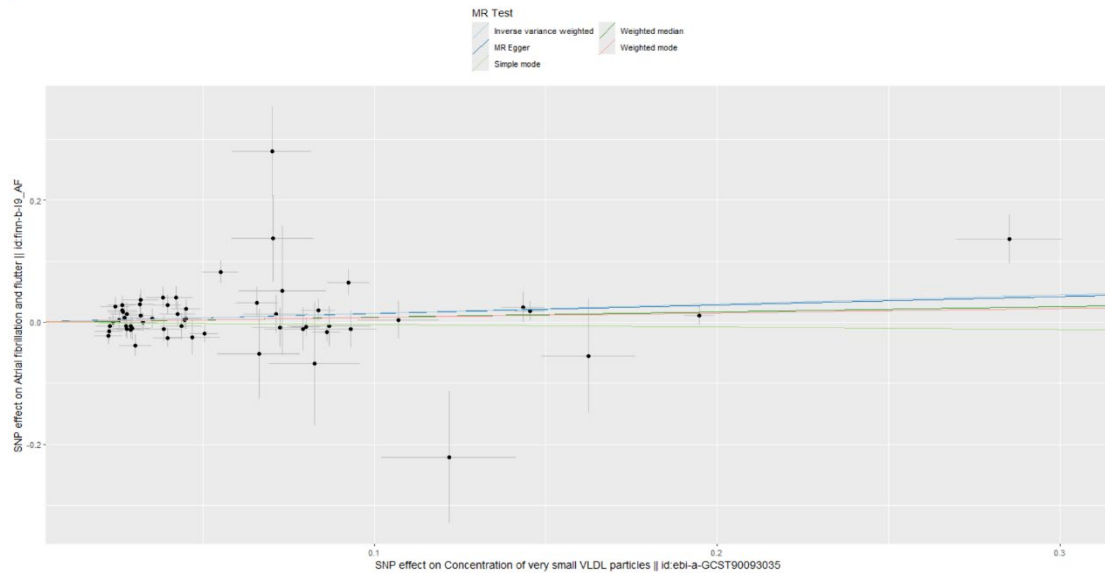

Figure S6 Forest plot of MR effect size using IVW methods for causal associations between lipid traits and atrial fibrillation/Flutter.

1) Cholesterol to total lipids ratio in small VLDL

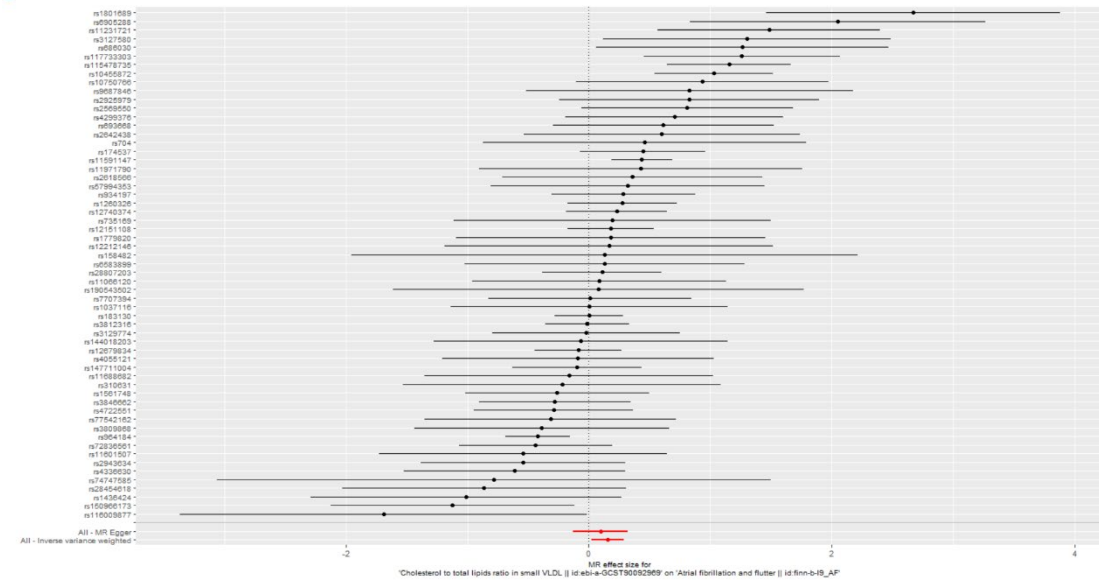

## 2) Cholesterol to total lipids ratio in very large VLDL

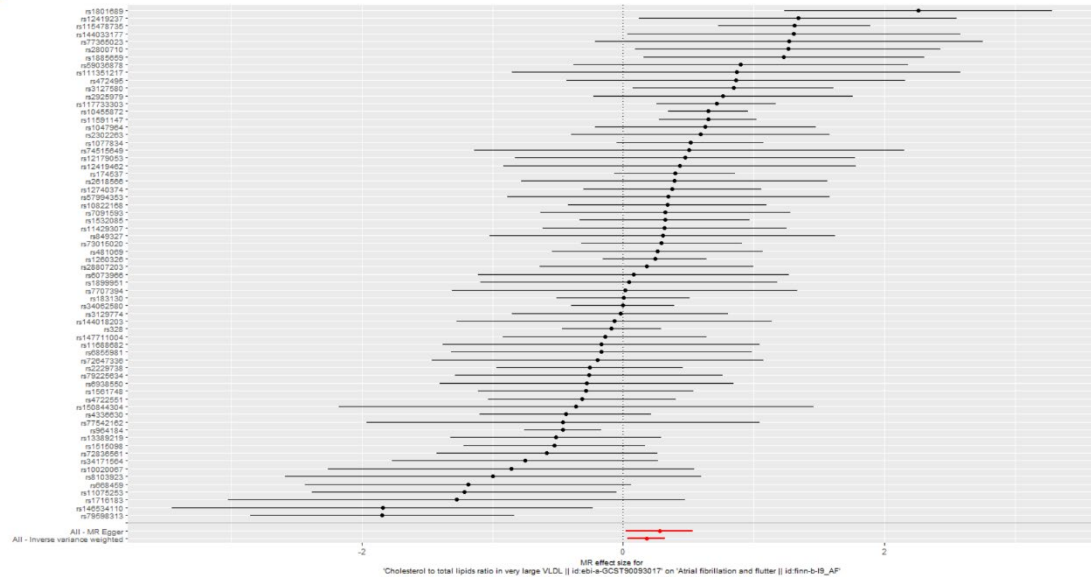

## 3) Cholesterol levels in very small VLDL

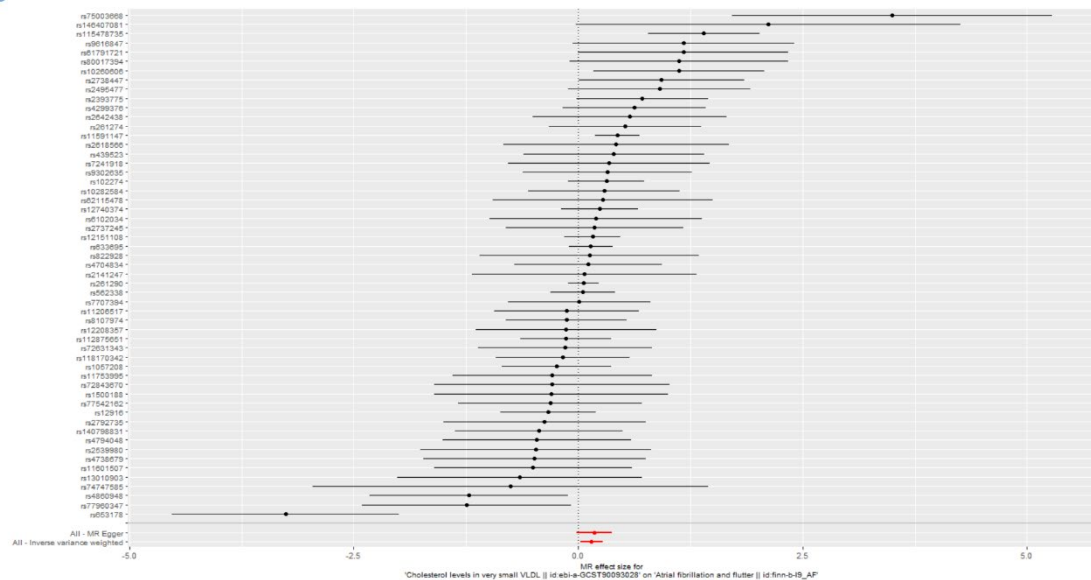

#### 4) Cholesteryl esters to total lipids ratio in small VLDL

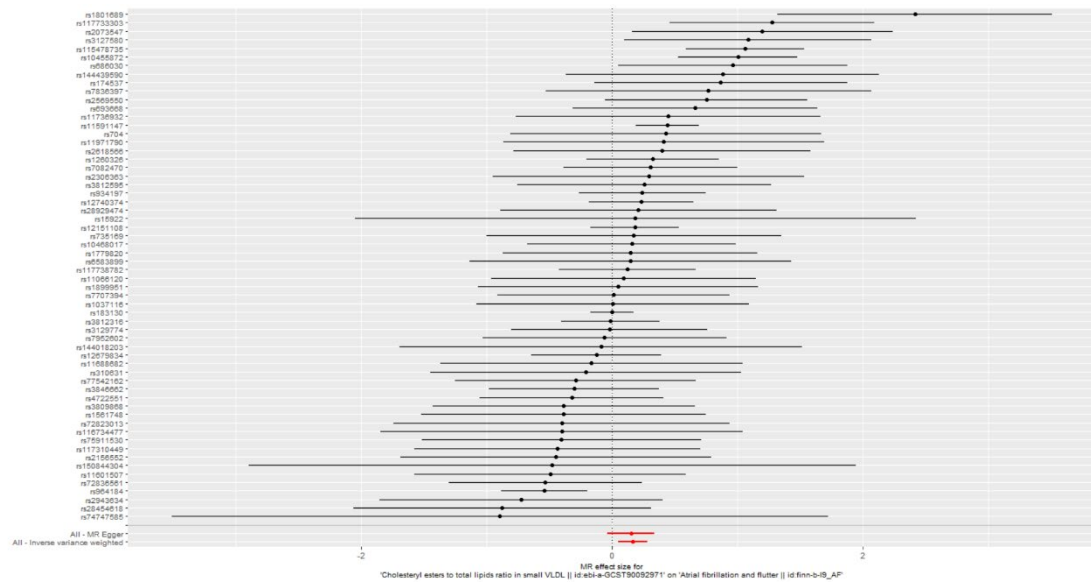

#### 5) Cholesteryl esters to total lipids ratio in very large VLDL

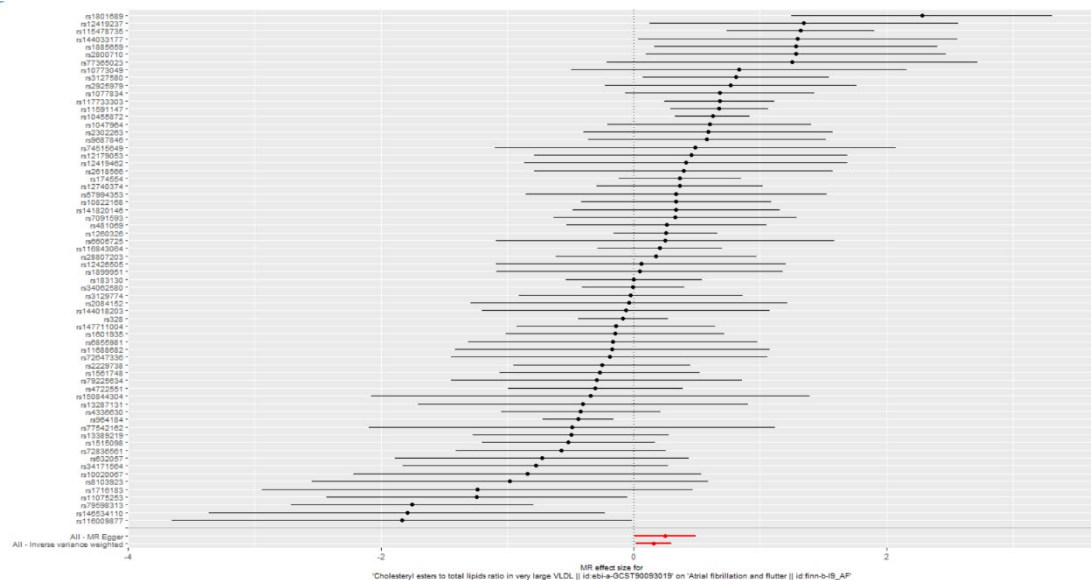

## 6) Cholesteryl esters in very small VLDL

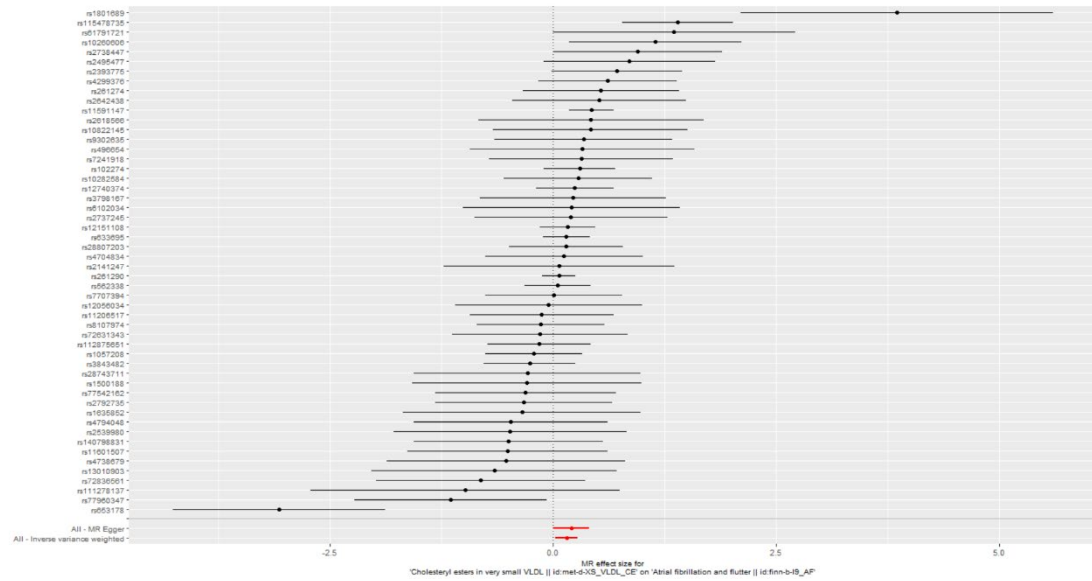

## 7) Free cholesterol to total lipids ratio in large VLDL

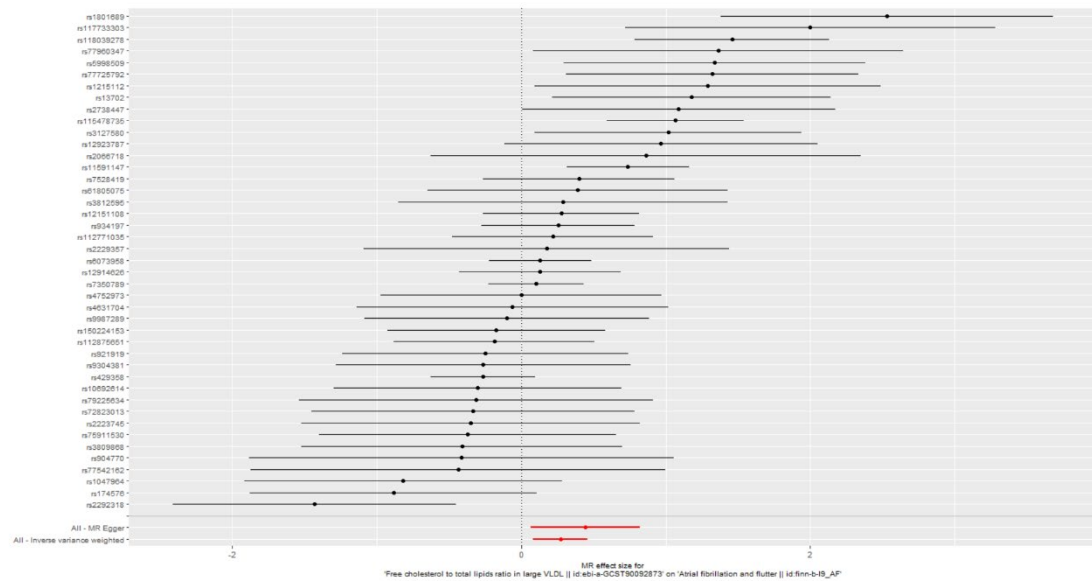

## 8) Free cholesterol to total lipids ratio in very large VLDL

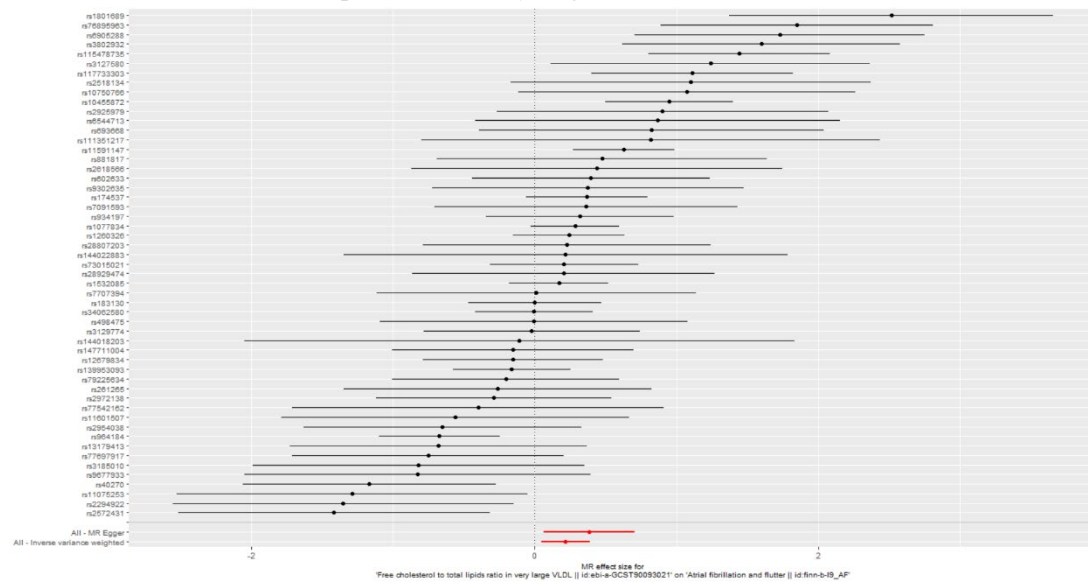

## 9) Free cholesterol to total lipids ratio in chylomicrons and extremely large VLDL

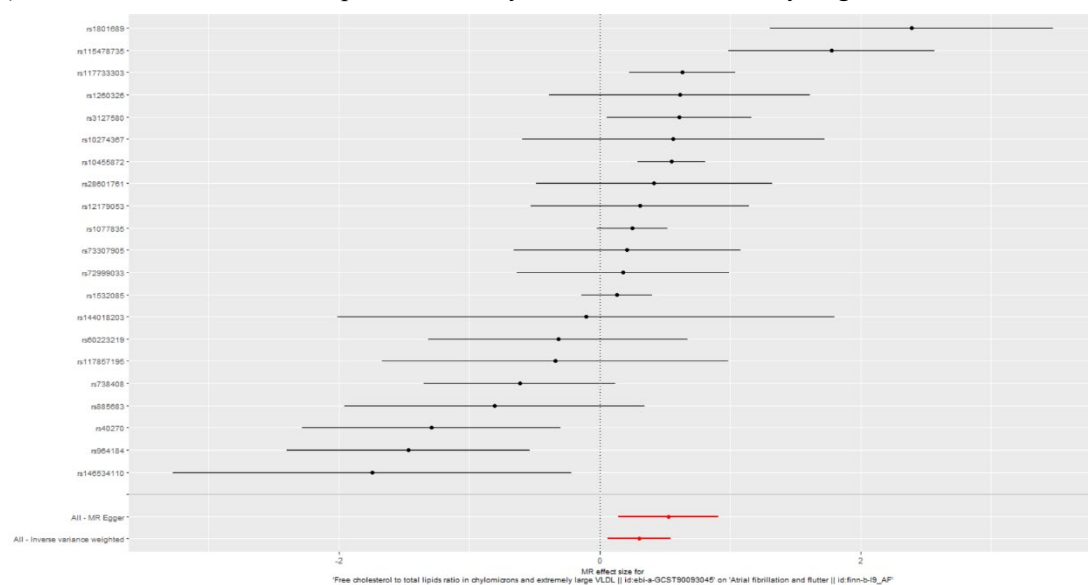

10) Free cholesterol levels in very small VLDL

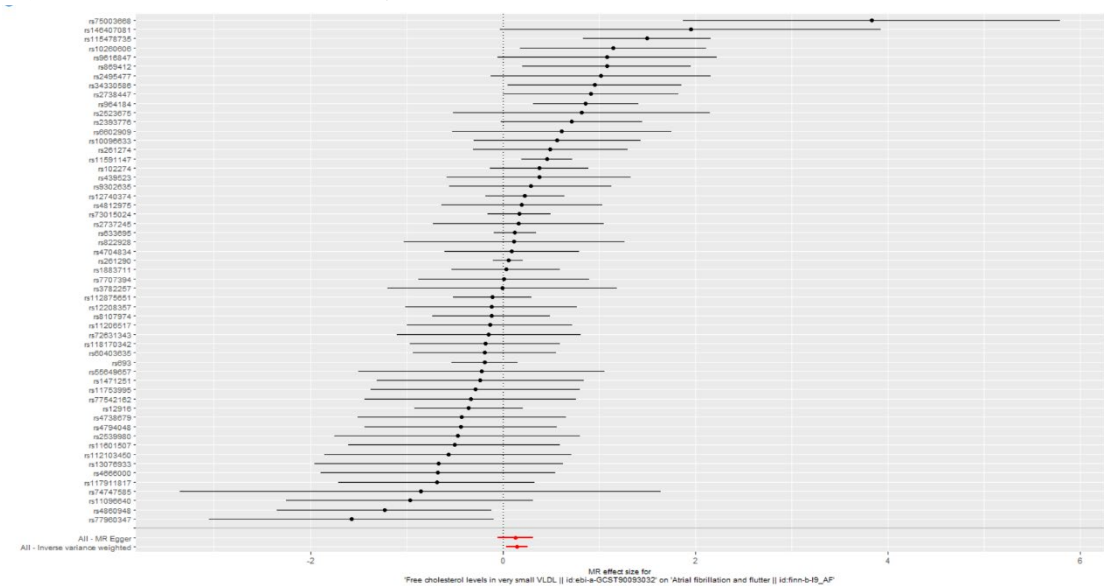

11) Phospholipids to total lipids ratio in medium VLDL

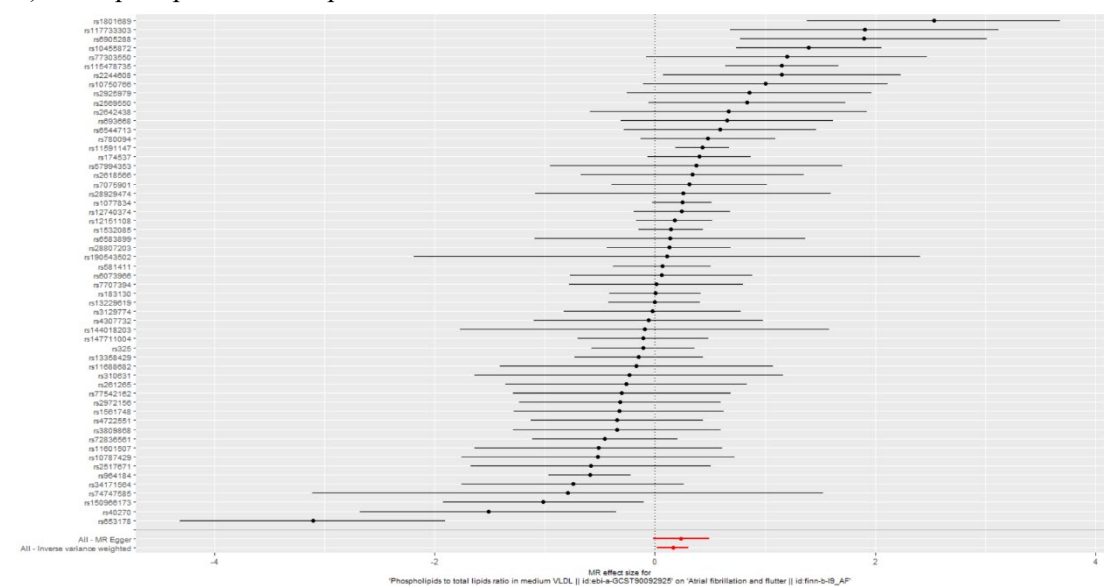

## 12) Phospholipids to total lipids ratio in chylomicrons and extremely large VLDL

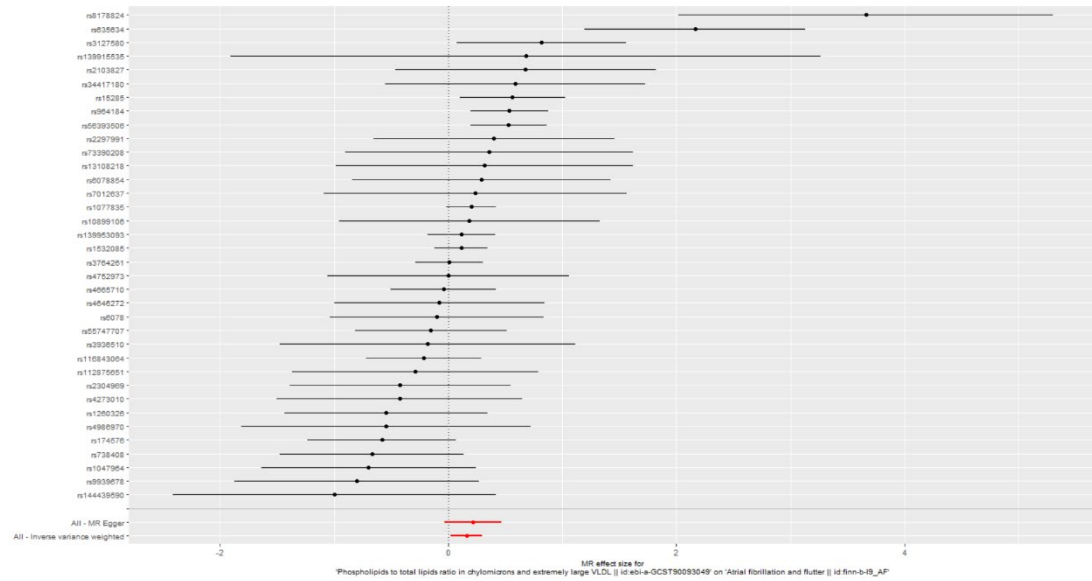

## 13) Phospholipids in IDL

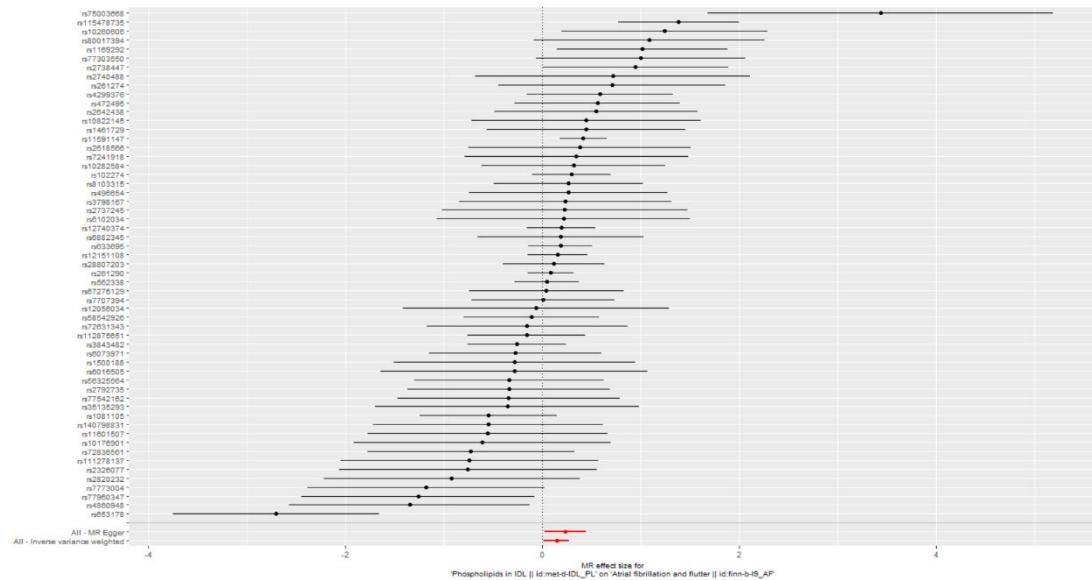

14) Triglycerides to total lipids ratio in large VLDL

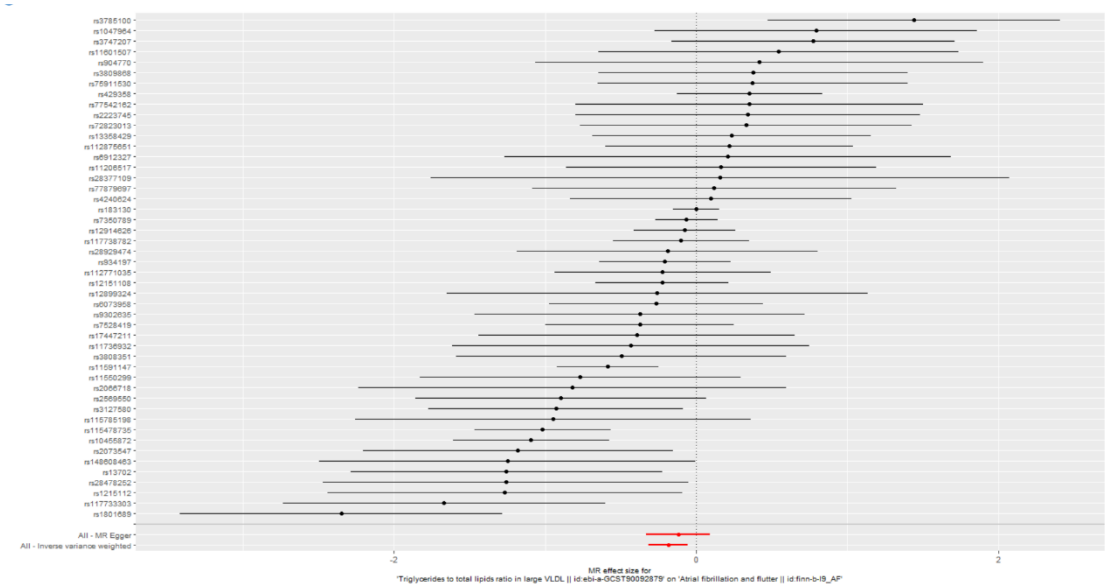

15) Triglycerides to total lipids ratio in very large VLDL

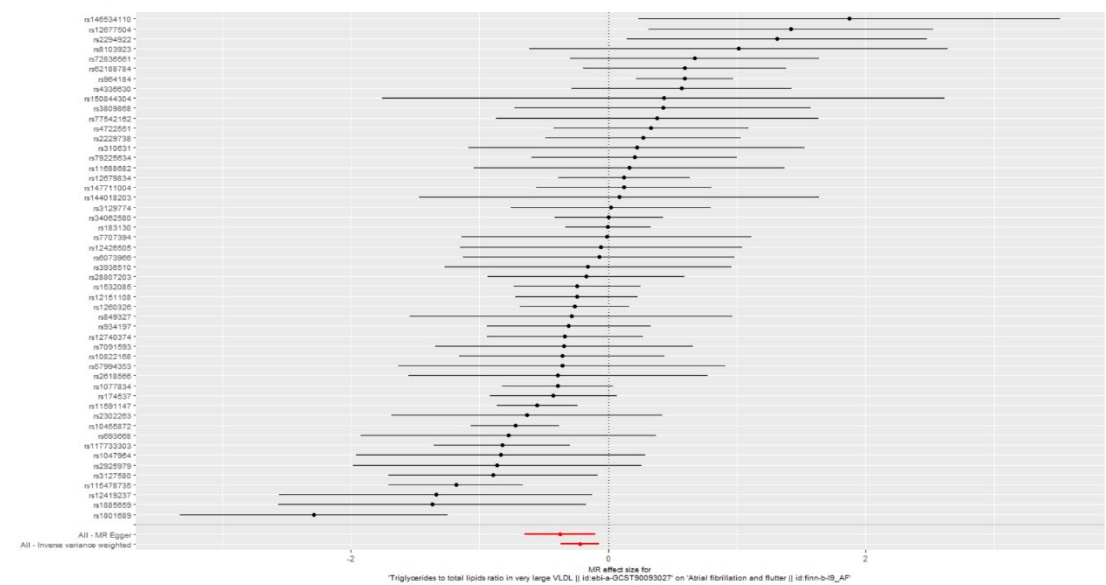

## 16) Concentration of IDL particles

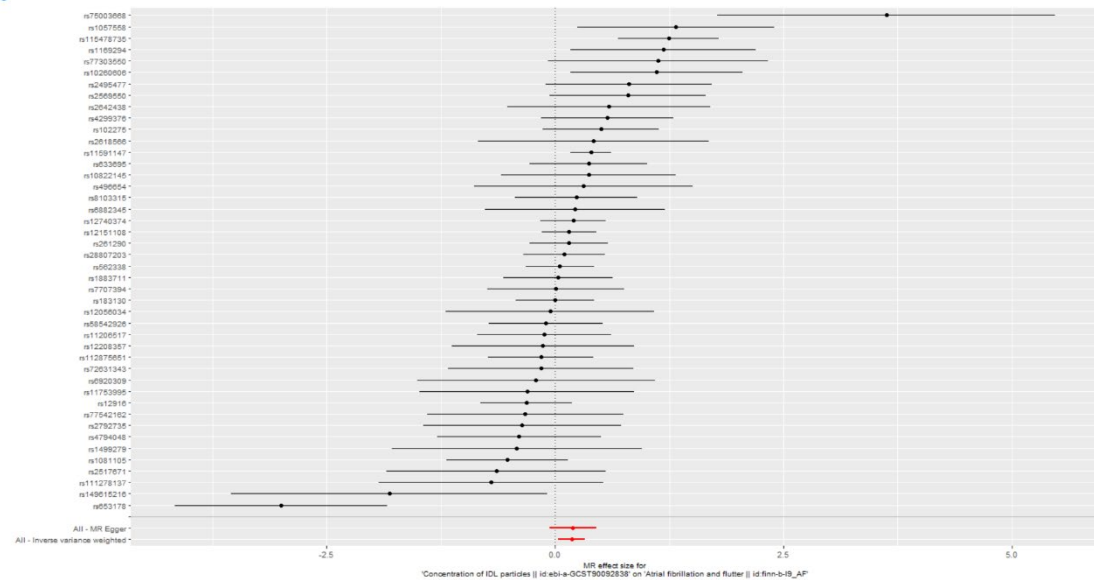

## 17) Concentration of very small VLDL particles

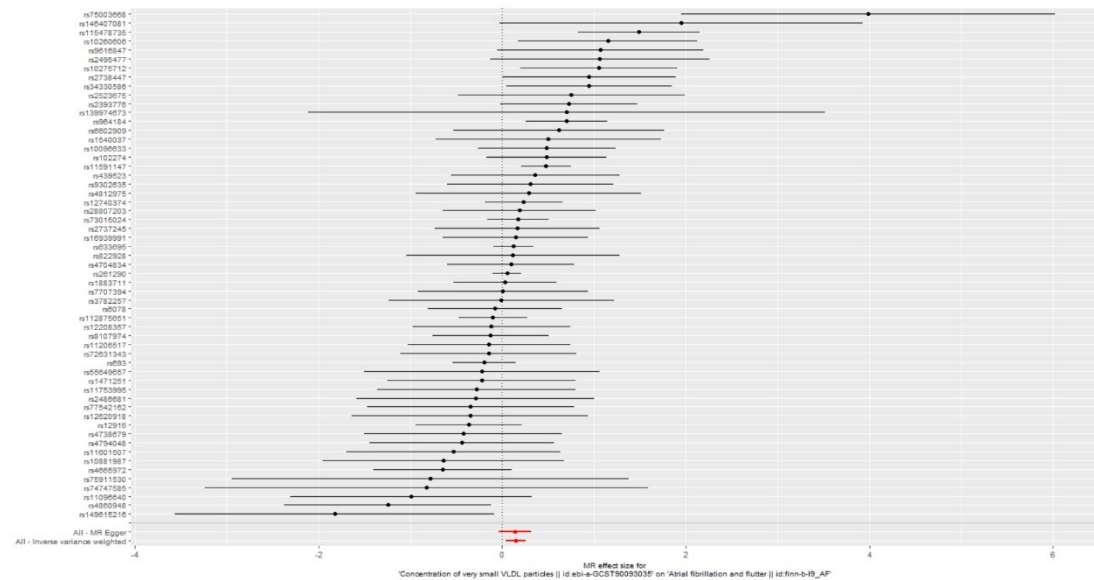

Figure S7 Funnel plot of causal associations between lipid traits and atrial fibrillation/Flutter.

1) Cholesterol to total lipids ratio in small VLDL

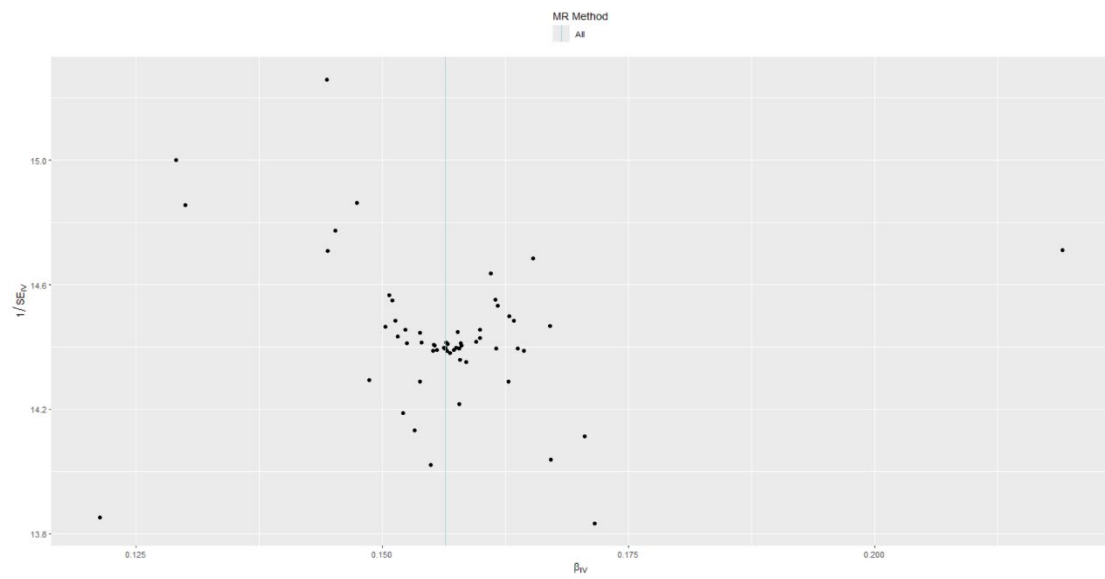

2) Cholesterol to total lipids ratio in very large VLDL

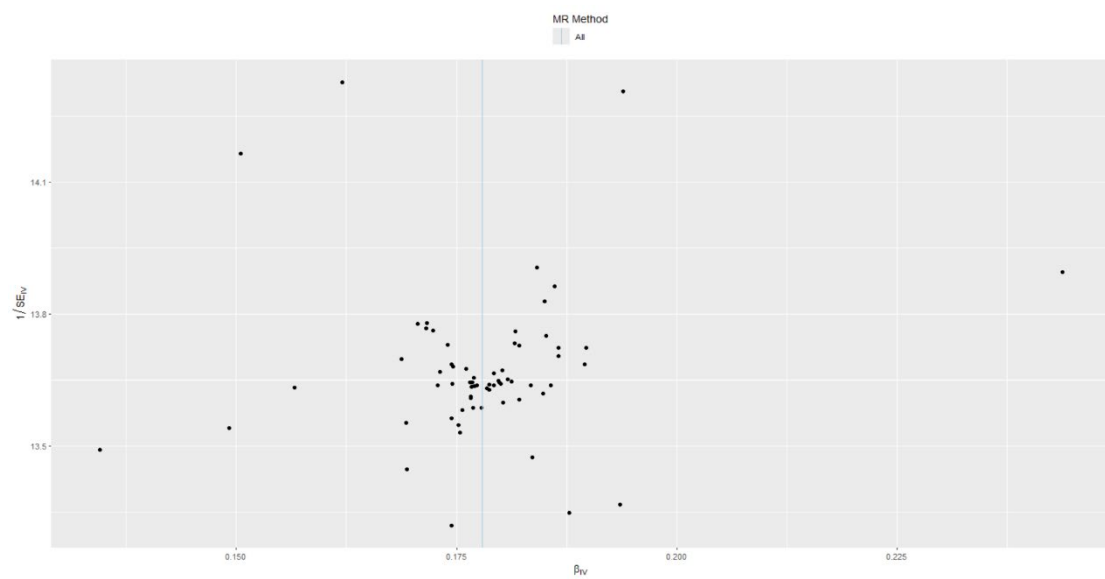

3) Cholesterol levels in very small VLDL

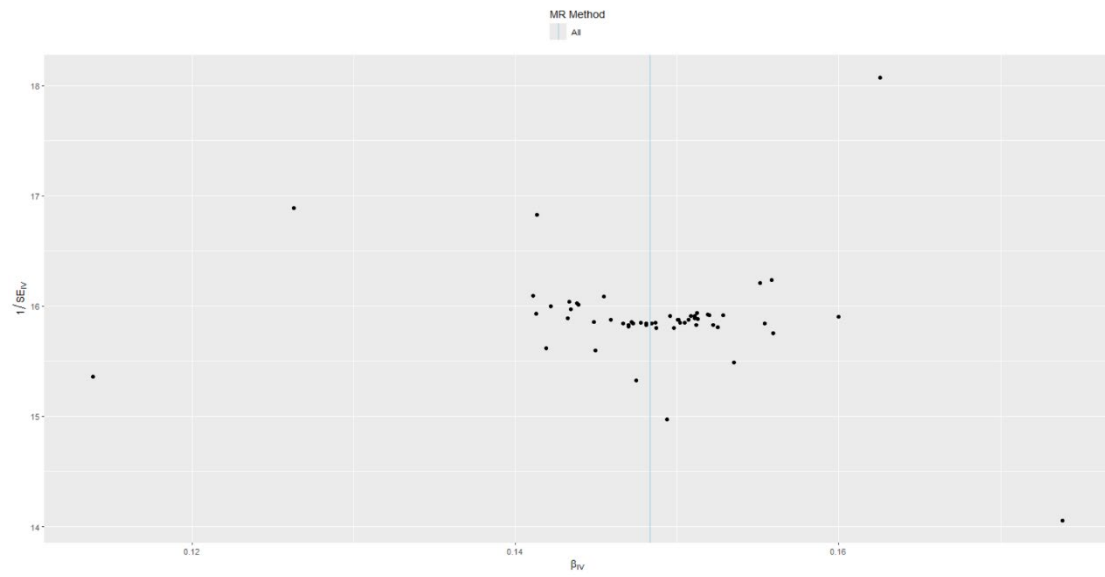

4) Cholesteryl esters to total lipids ratio in small VLDL

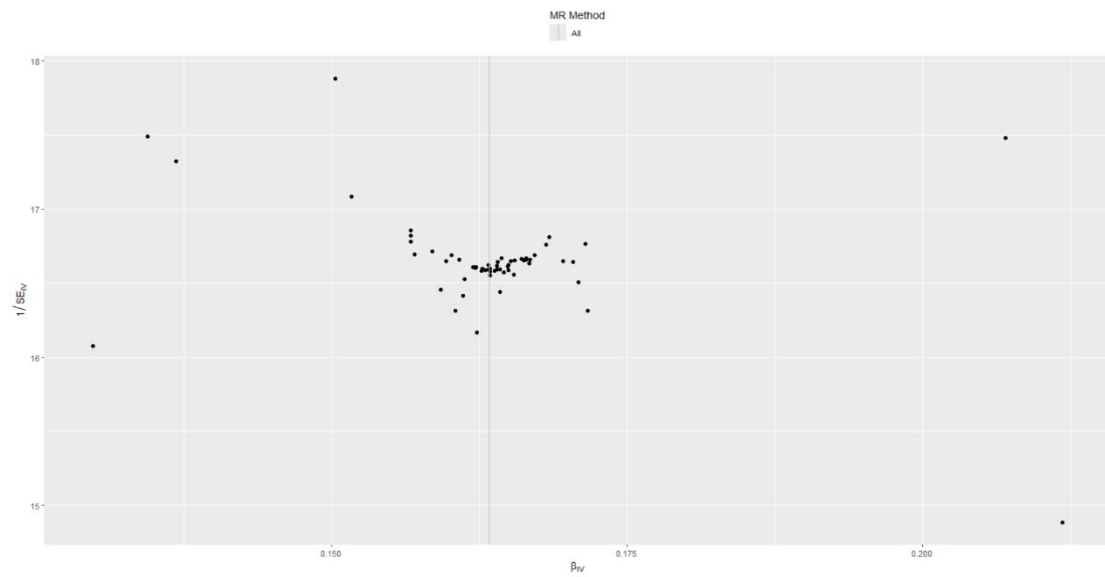

5) Cholesteryl esters to total lipids ratio in very large VLDL

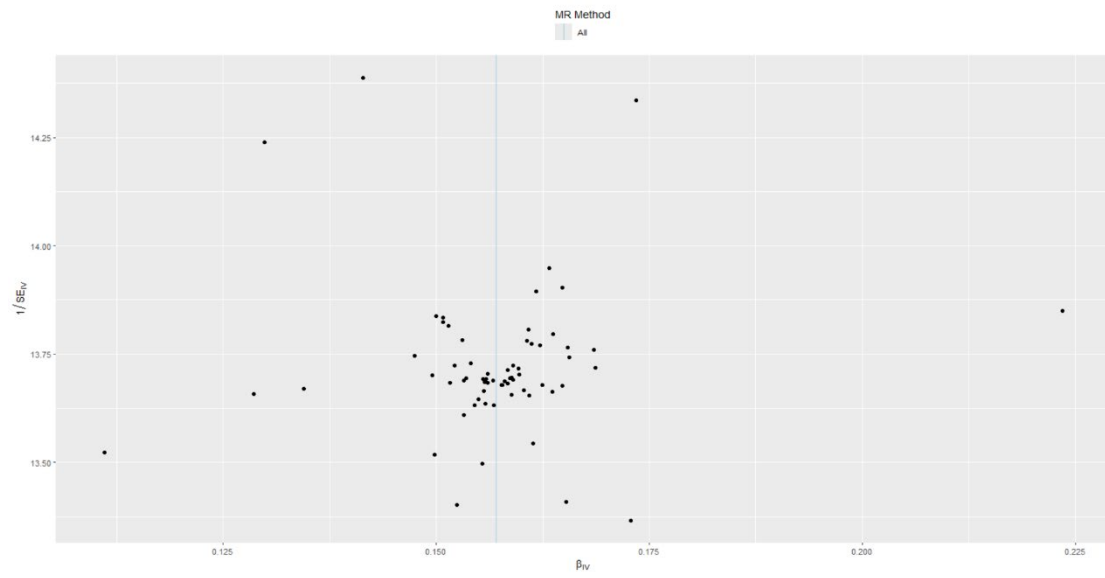

6) Cholesteryl esters in very small VLDL

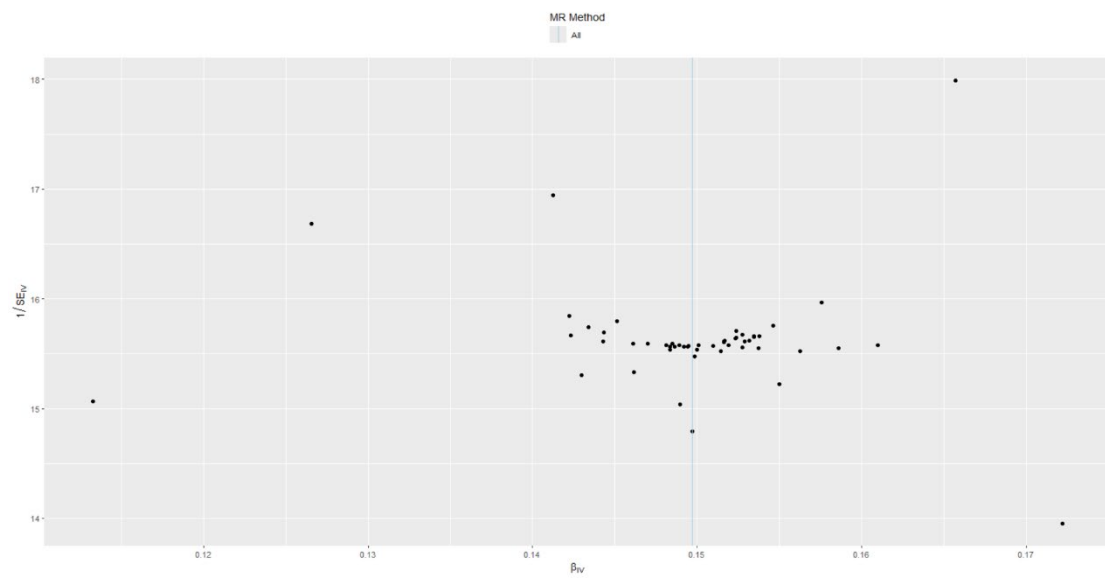

7) Free cholesterol to total lipids ratio in large VLDL

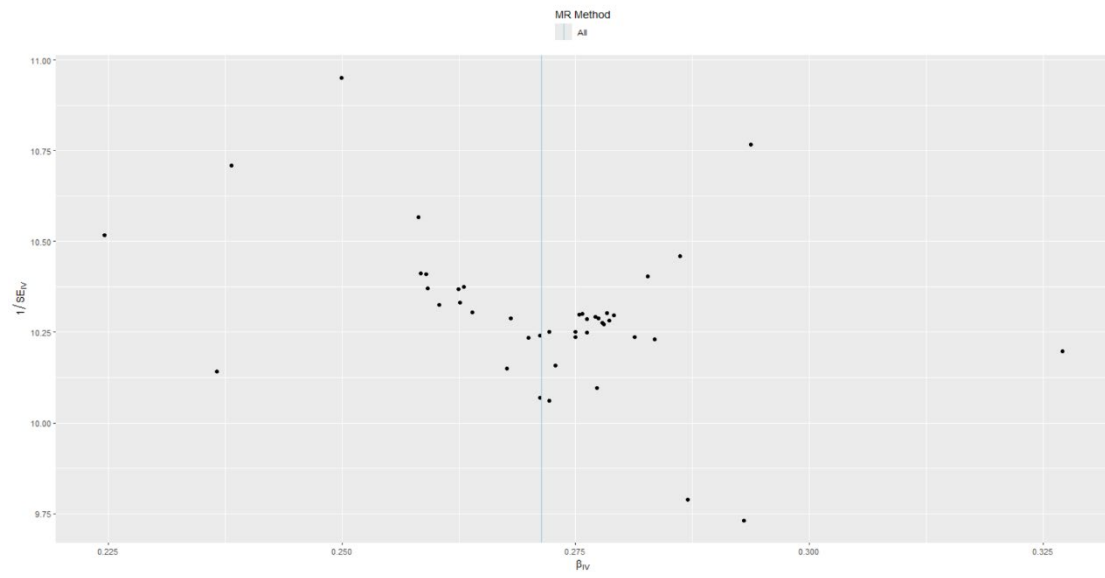

8) Free cholesterol to total lipids ratio in very large VLDL

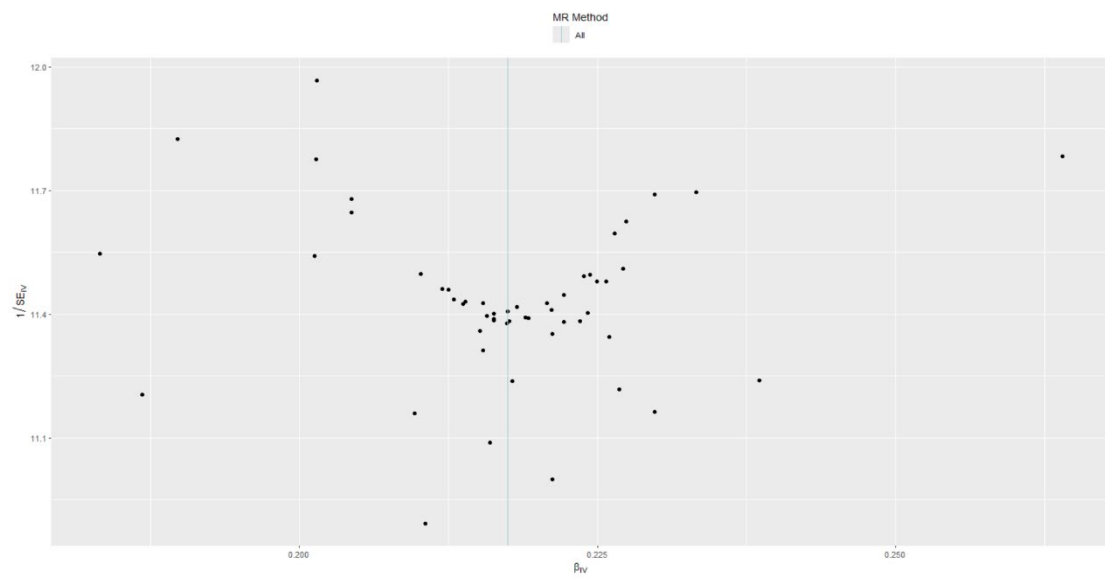

9) Free cholesterol to total lipids ratio in chylomicrons and extremely large VLDL

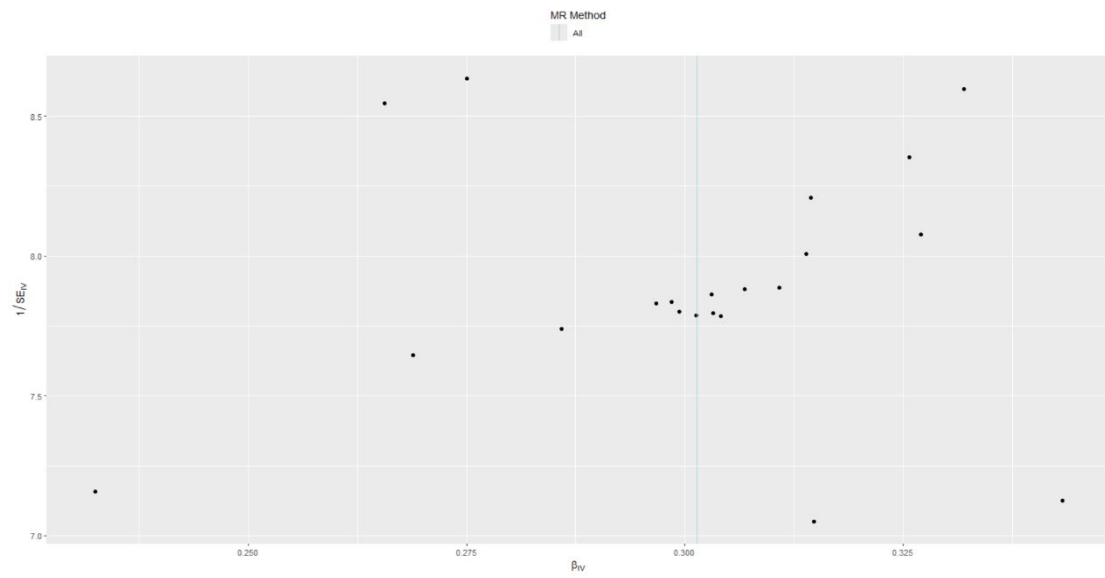

10) Free cholesterol levels in very small VLDL

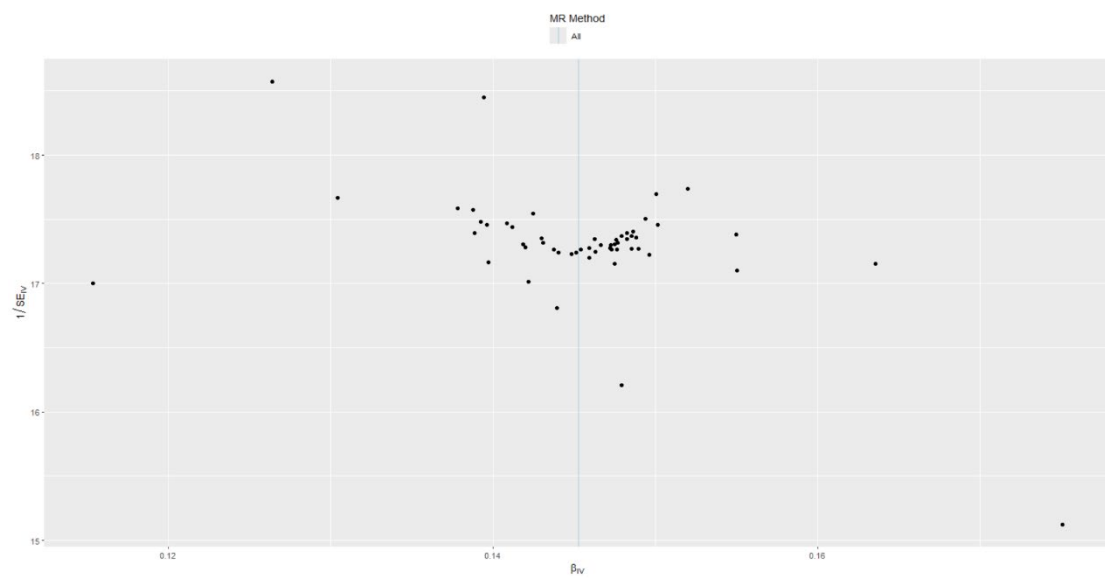

### 11) Phospholipids to total lipids ratio in medium VLDL

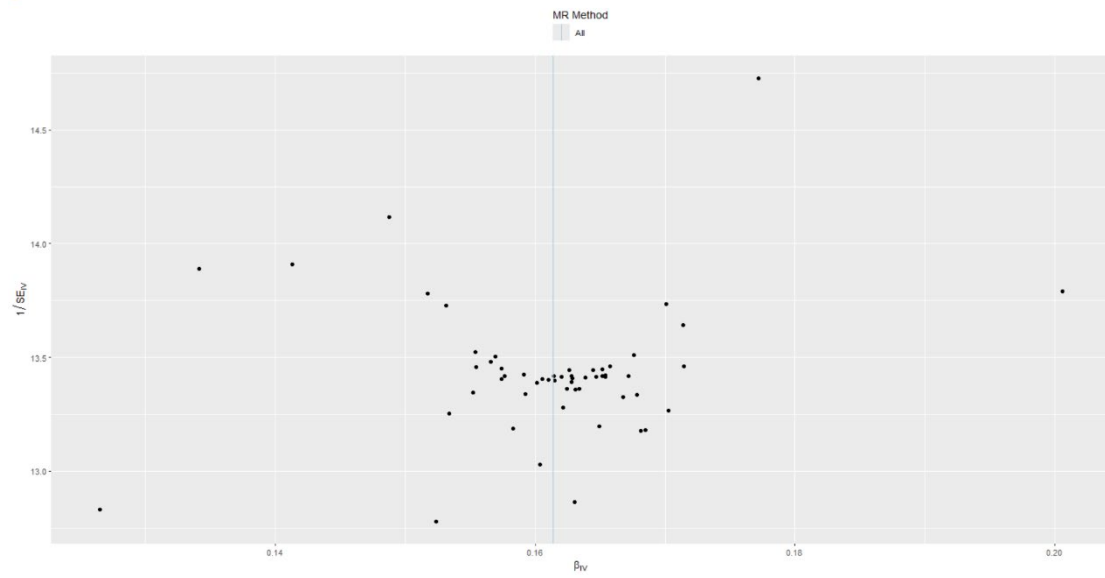

### 12) Phospholipids to total lipids ratio in chylomicrons and extremely large VLDL

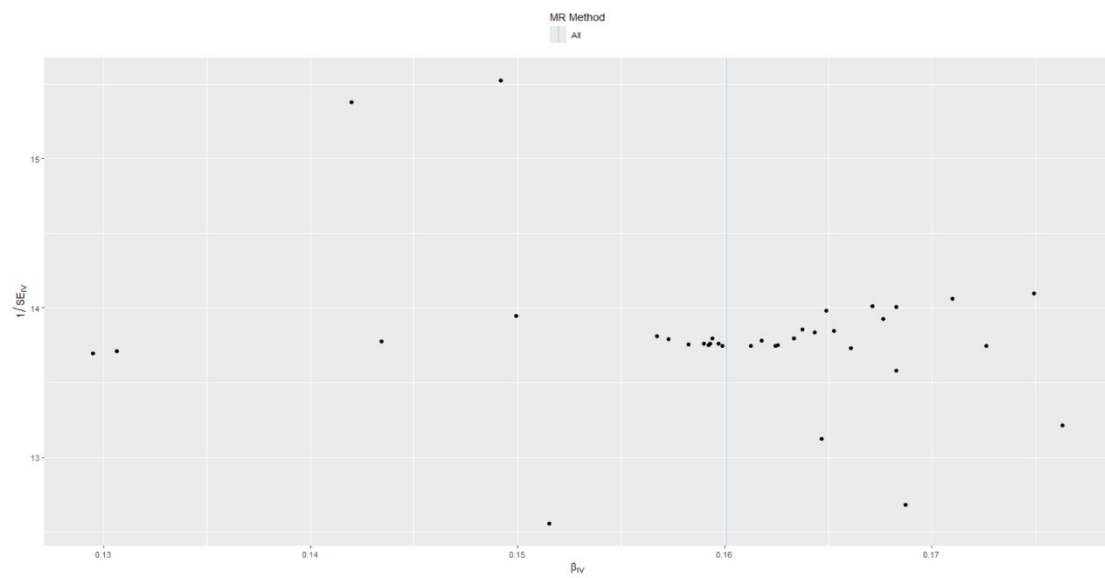

13) Phospholipids in IDL

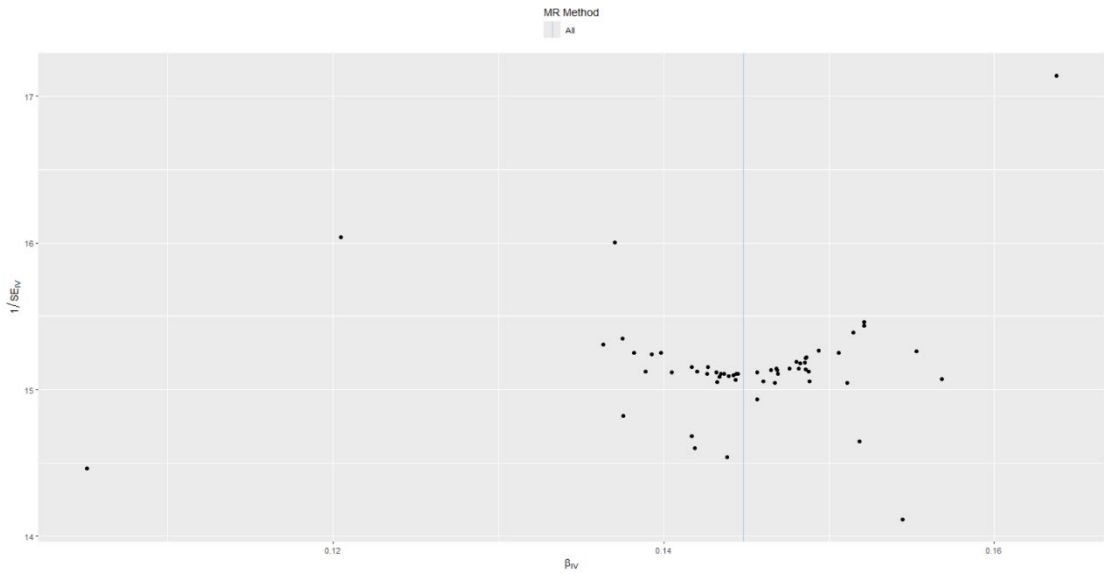

14) Triglycerides to total lipids ratio in large VLDL

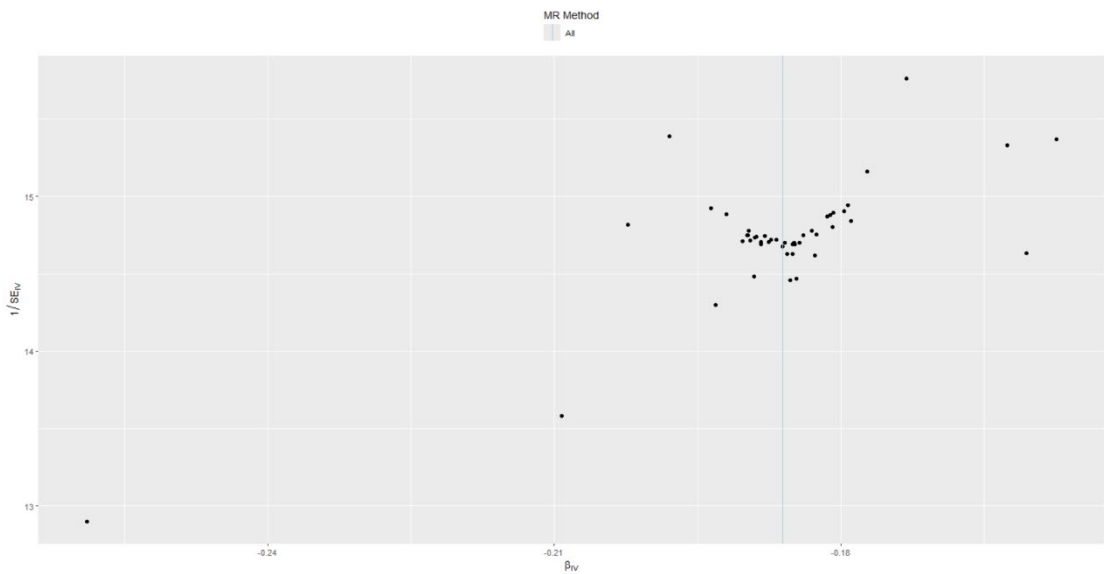

15) Triglycerides to total lipids ratio in very large VLDL

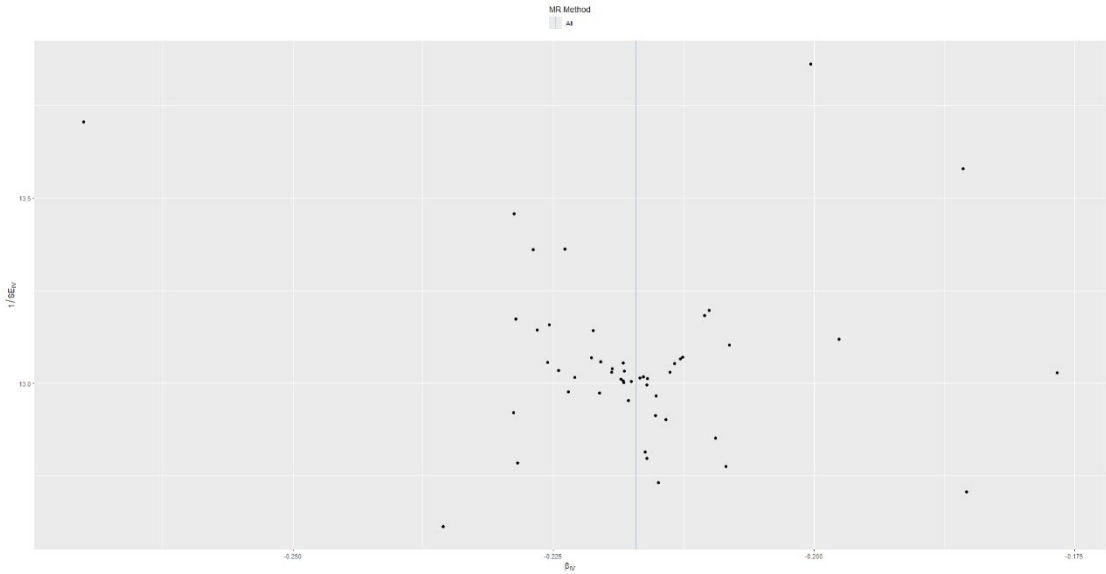

16) Concentration of IDL particles

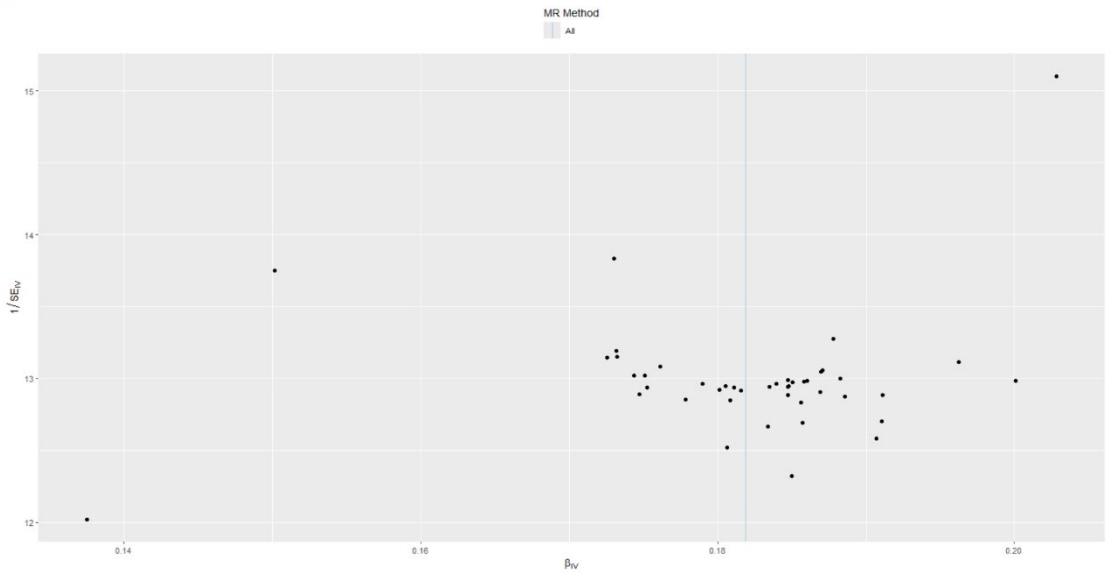

17) Concentration of very small VLDL particles

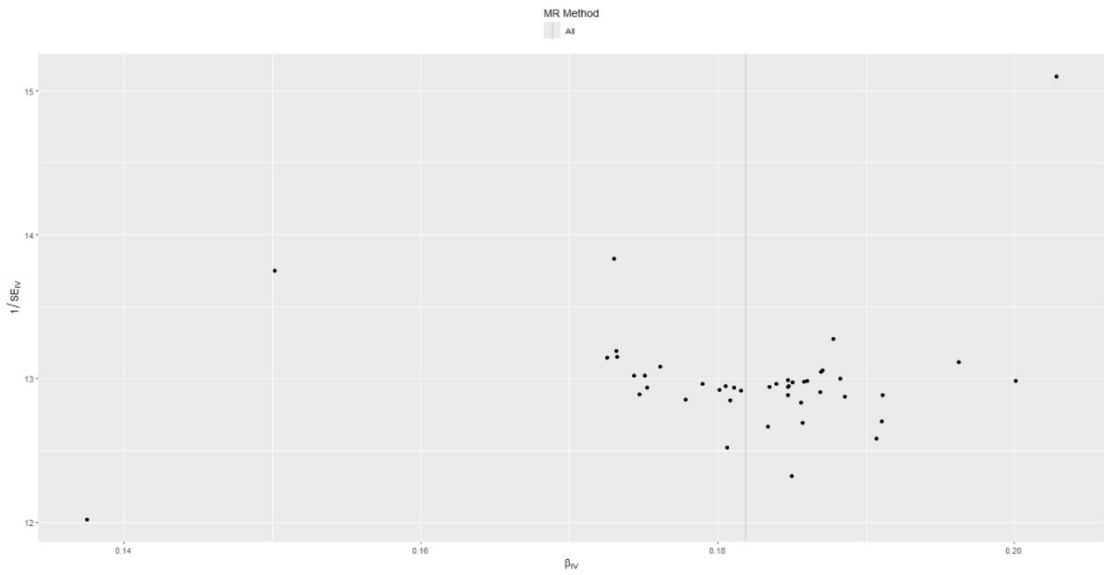

Figure S8 Leave-one-out plot to assess if a single variant is driving the association between lipid traits and atrial fibrillation/Flutter

1) Cholesterol to total lipids ratio in small VLDL

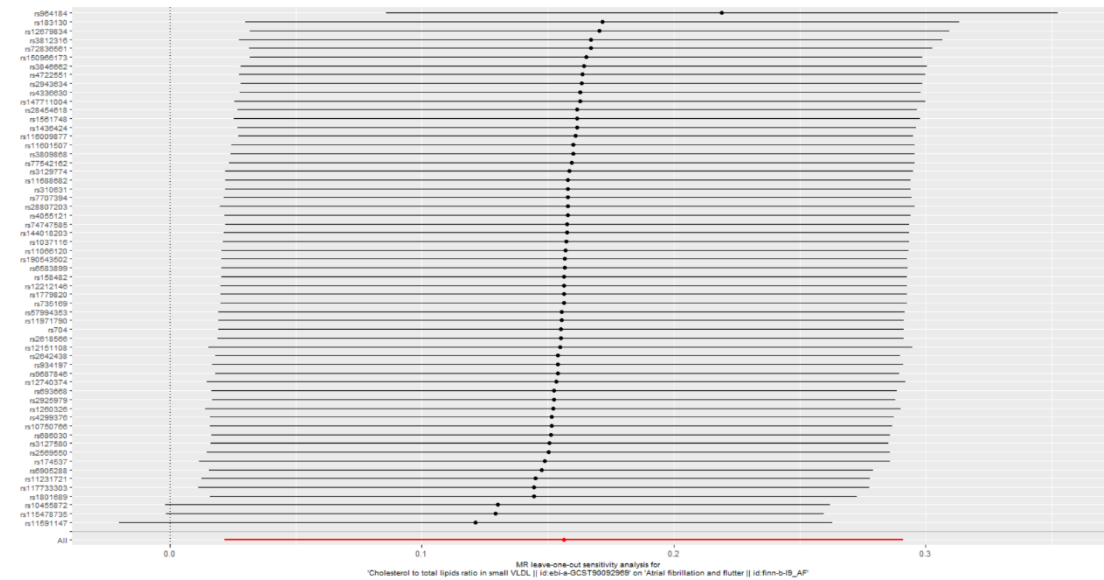

## 2) Cholesterol to total lipids ratio in very large VLDL

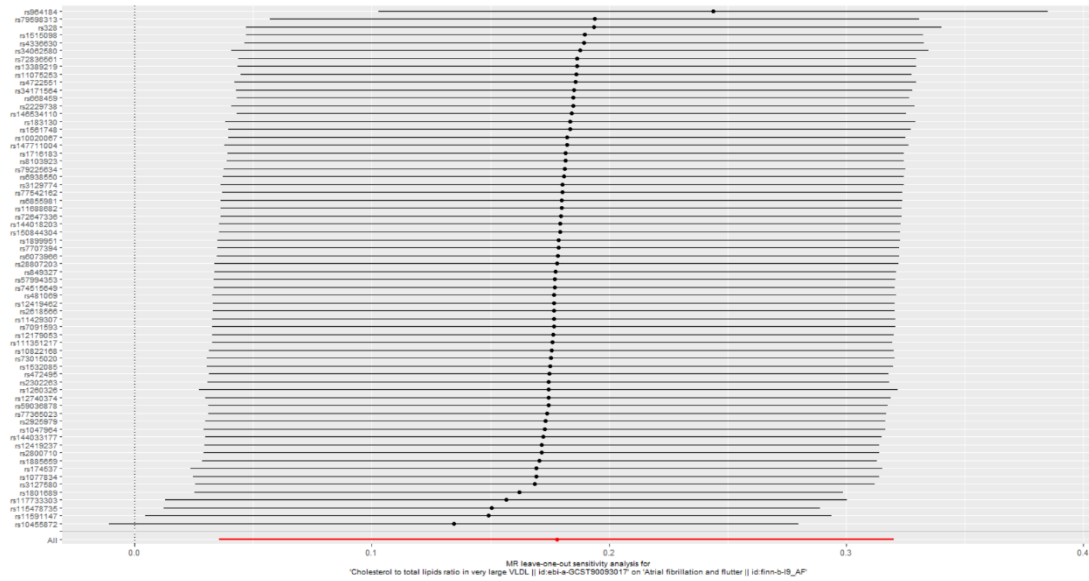

## 3) Cholesterol levels in very small VLDL

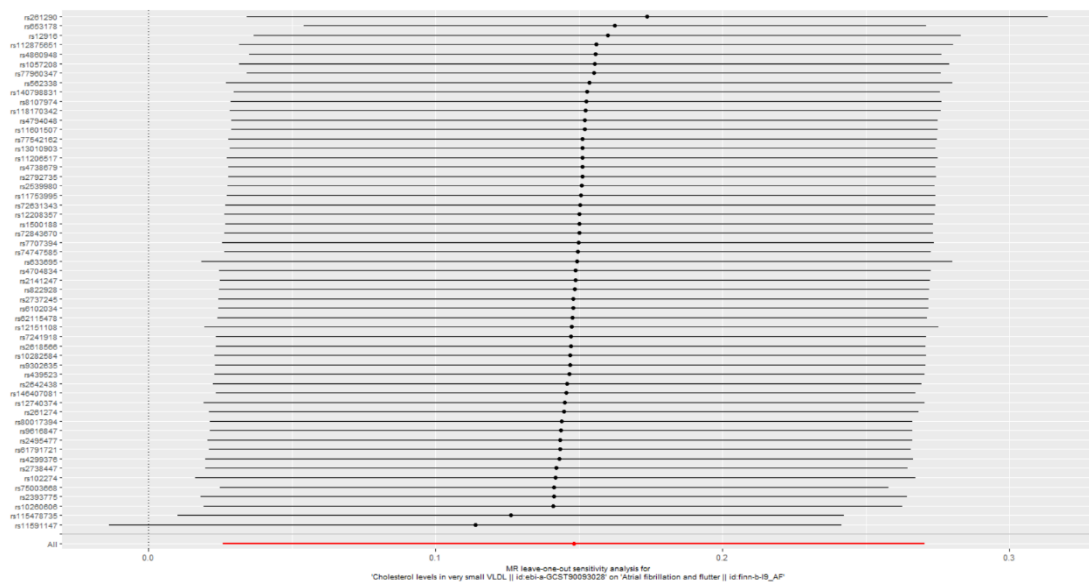

#### 4) Cholesteryl esters to total lipids ratio in small VLDL

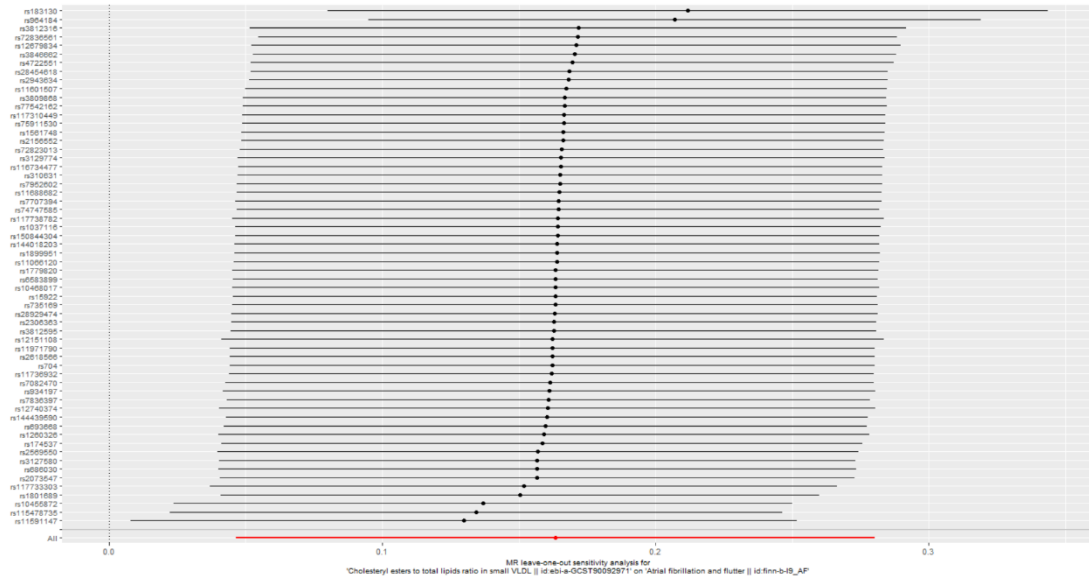

#### 5) Cholesteryl esters to total lipids ratio in very large VLDL

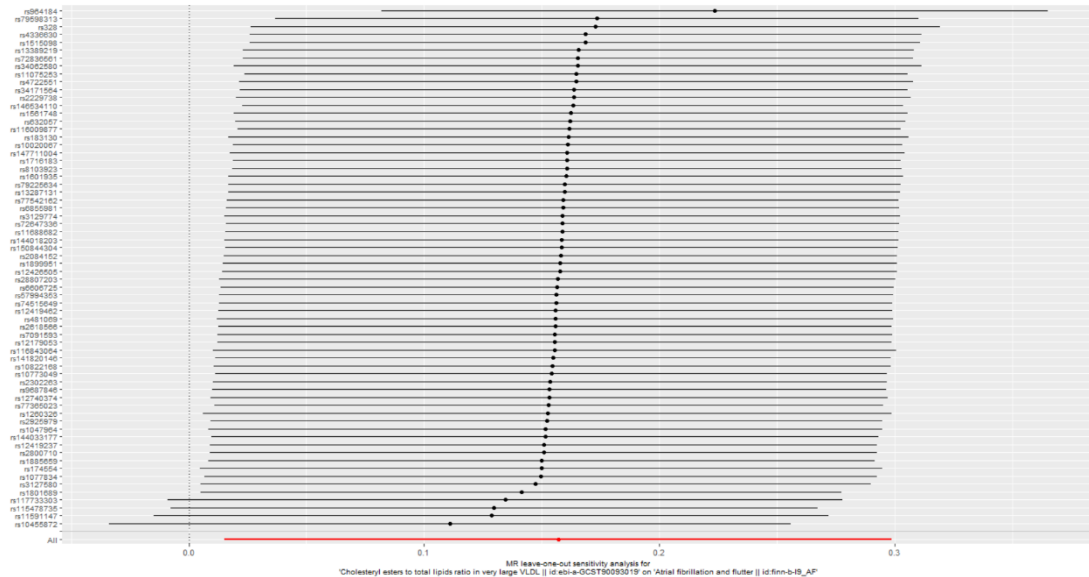

## 6) Cholesteryl esters in very small VLDL

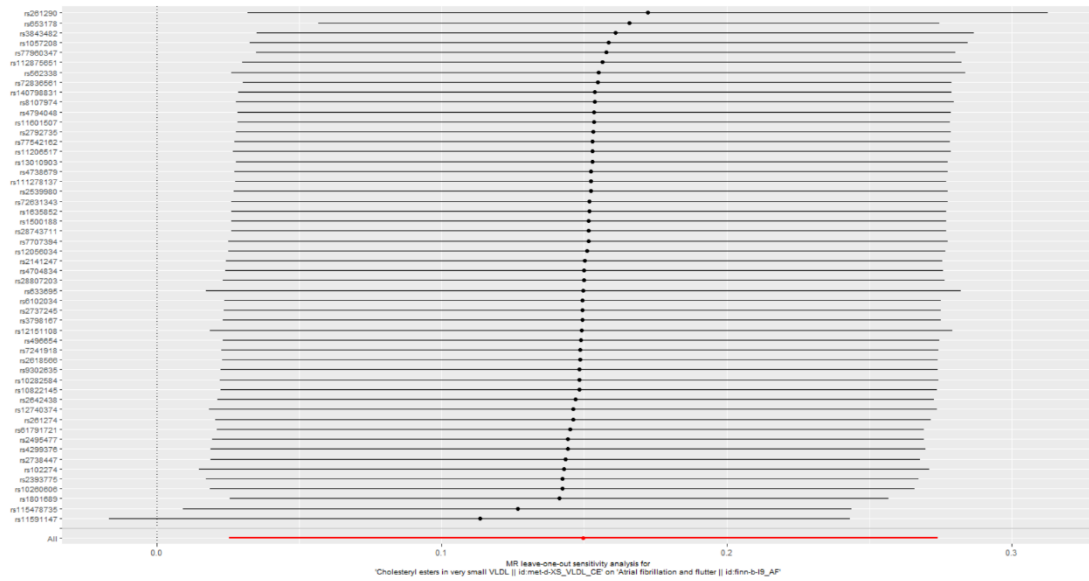

## 7) Free cholesterol to total lipids ratio in large VLDL

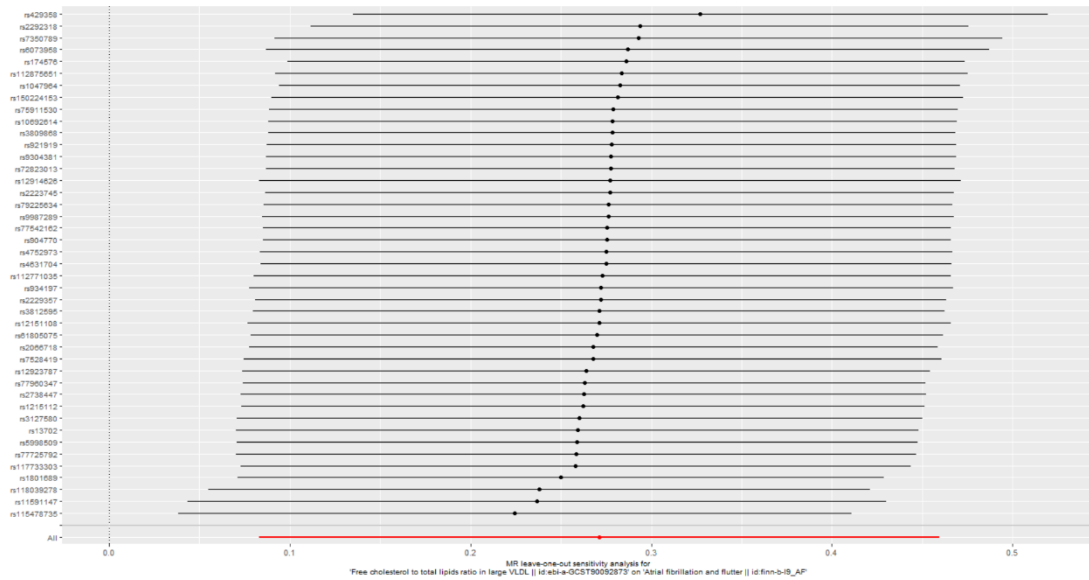

## 8) Free cholesterol to total lipids ratio in very large VLDL

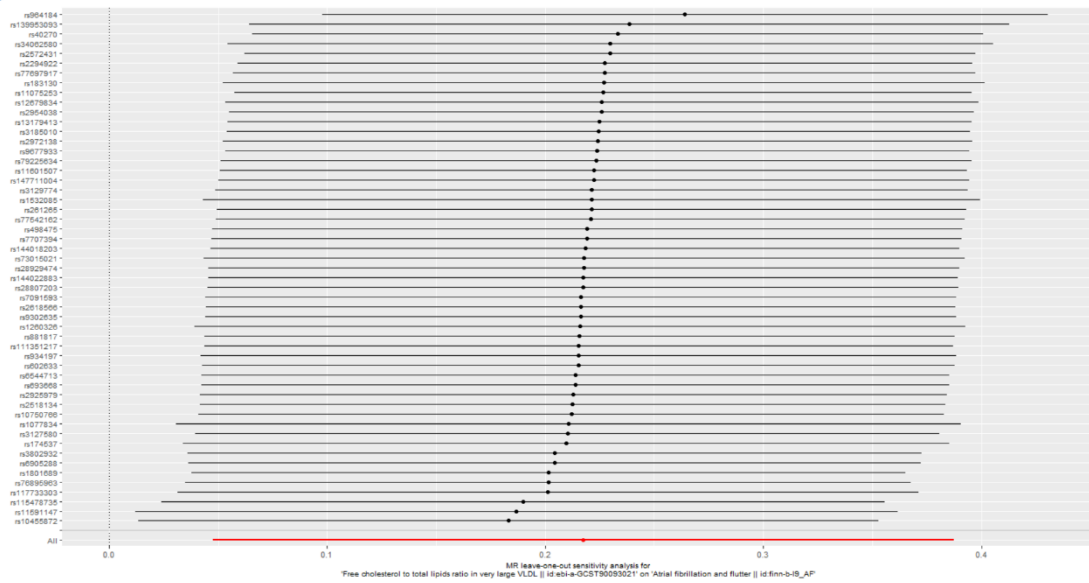

## 9) Free cholesterol to total lipids ratio in chylomicrons and extremely large VLDL

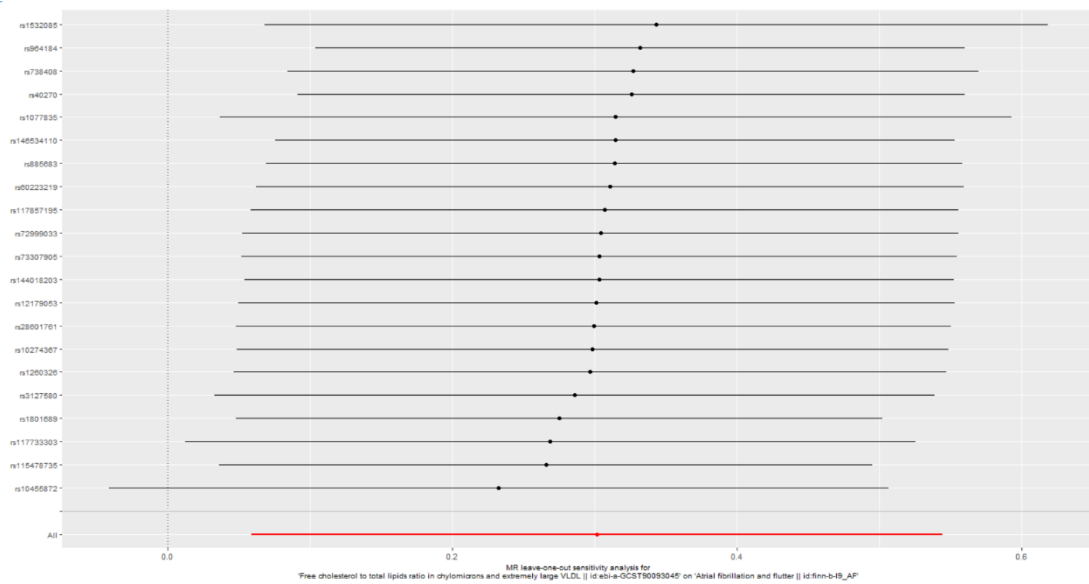

10) Free cholesterol levels in very small VLDL

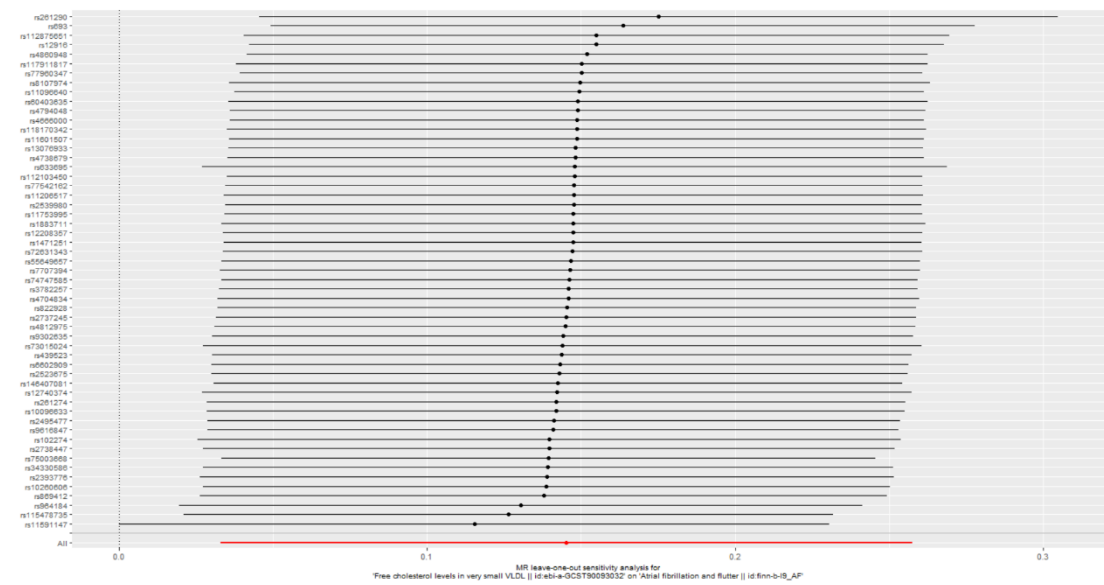

11) Phospholipids to total lipids ratio in medium VLDL

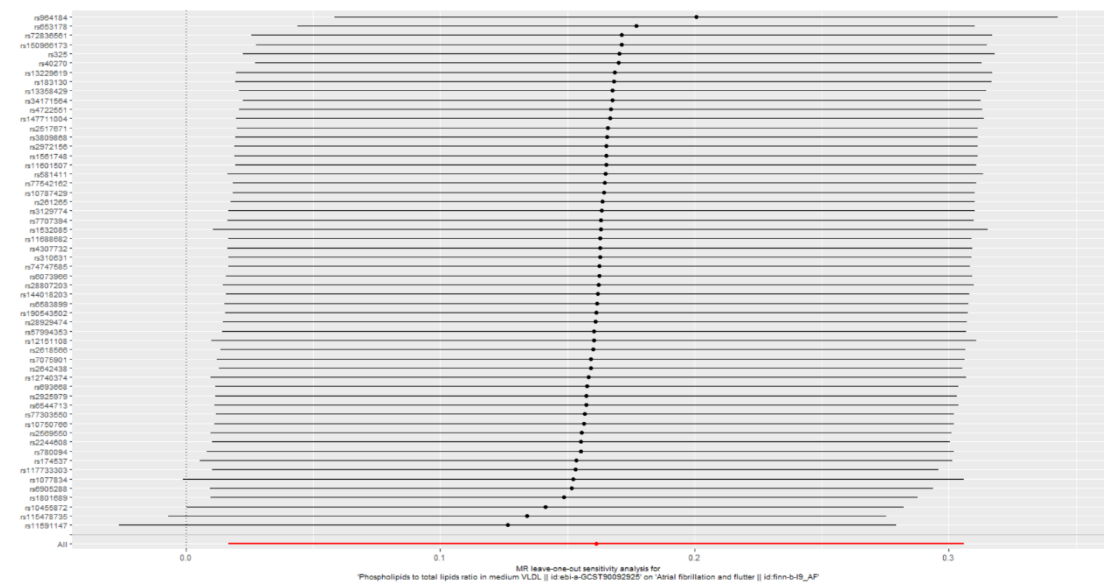

12) Phospholipids to total lipids ratio in chylomicrons and extremely large VLDL

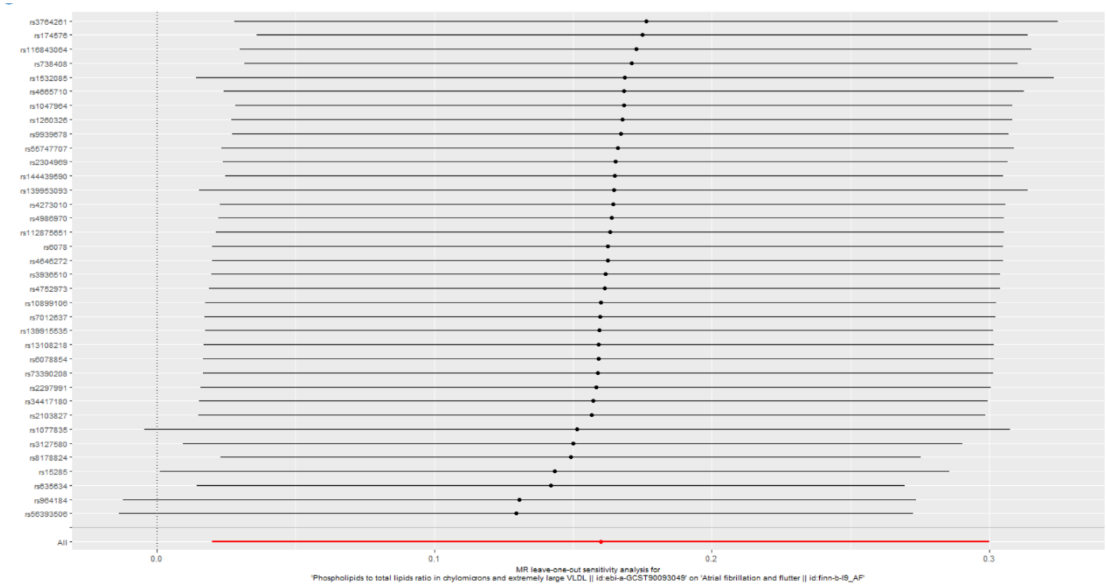

13) Phospholipids in IDL

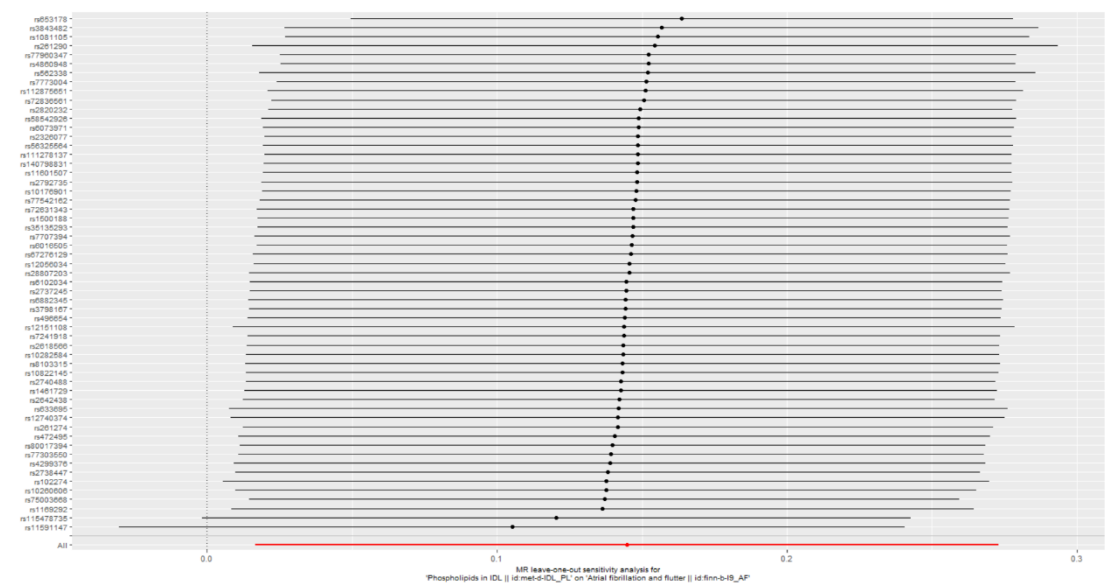

14) Triglycerides to total lipids ratio in large VLDL

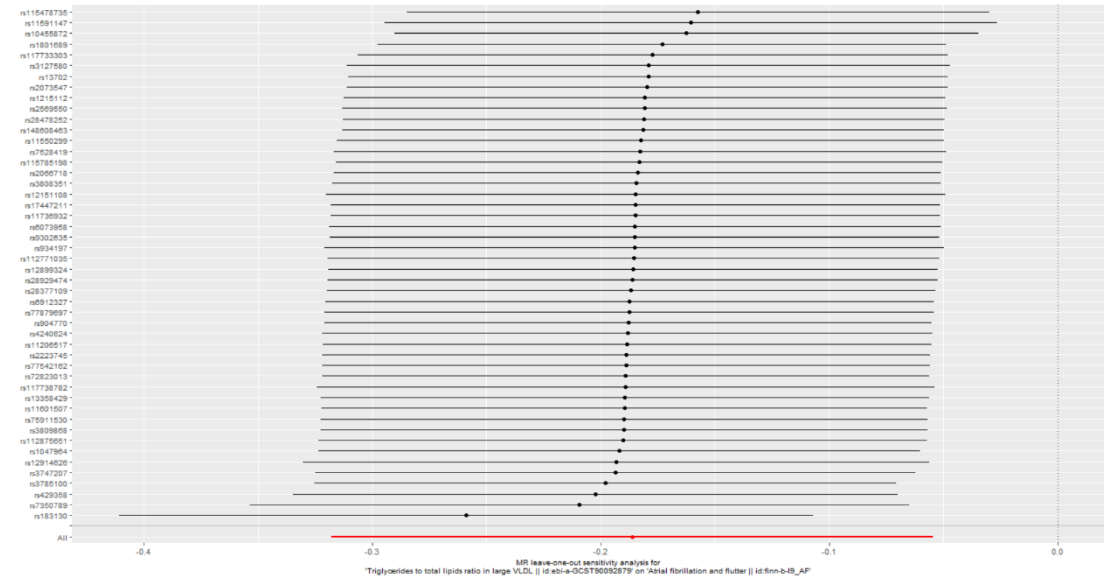

15) Triglycerides to total lipids ratio in very large VLDL

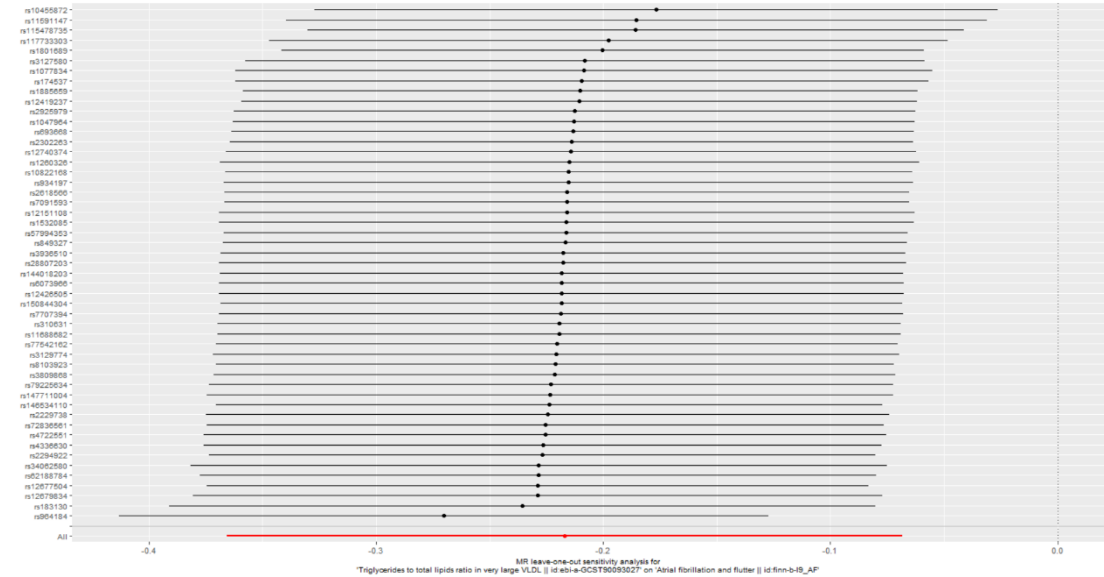

16) Concentration of IDL particles

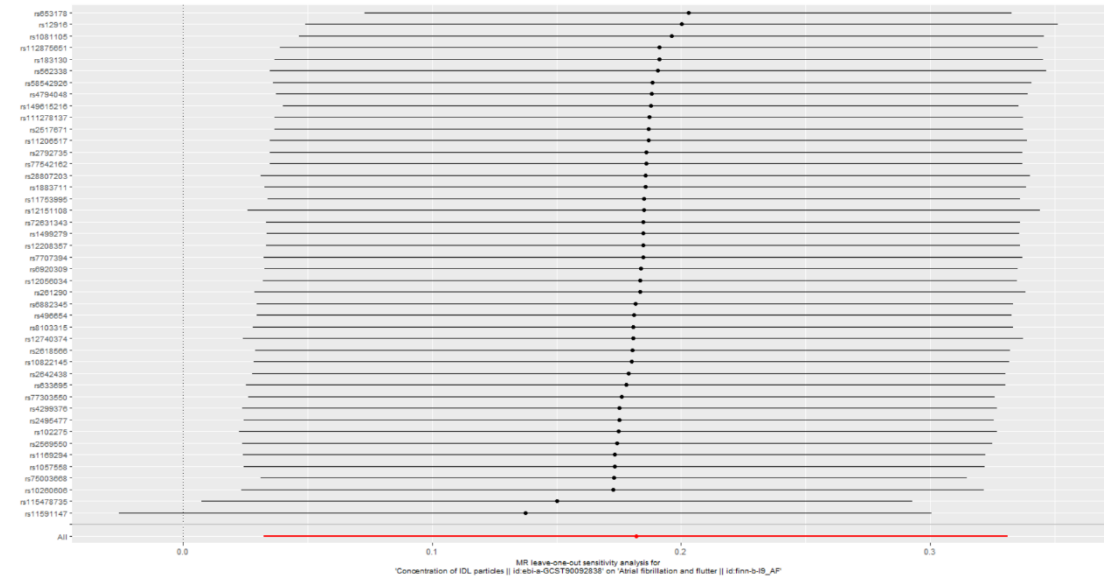

17) Concentration of very small VLDL particles

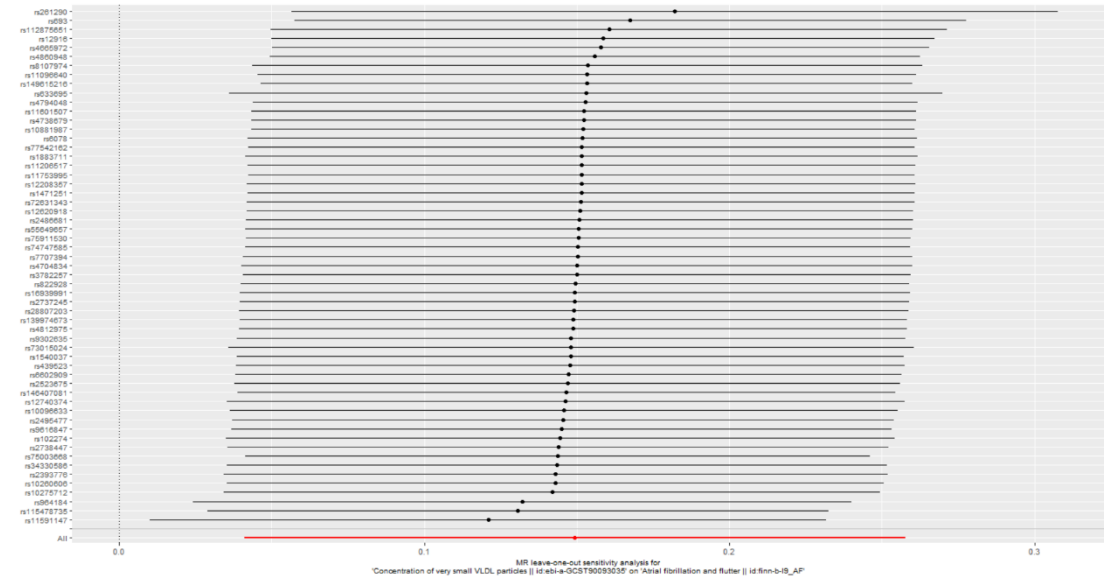

Supplement: Supplementary file 1 [file 050ad12e7a859fed5ecbad4e.pdf]
