# Supplementary material for: The Causal Relationships between Lipids related Traits and Atrial Fibrillation/Flutter: Two-sample Mendelian Randomization Analysis
Source: Research Square preprint supplement (doi:10.21203/rs.3.rs-6624447/v1), 2025-05-16
Supplement: Supplementary file 1 [file 294ee71caddf59ac64efeedb.xlsx]

## Sheet: Table of Contents
Table	Description
Table S1	Summary of exposures and outcome in our study.
Table S2	The results of MR estimation and pleiotropy assessment for lipids and their related traits on AF.
Table S3	The main significant results of MR estimation and pleiotropy assessment for lipids and its related traits on AF.
Table S4	Value of F statistic for each instrument of exposure that were causally associated with AF according to the IVW method.
Table S5	Table S5 Multivariable MR Analysis of lipid subfractions and atrial fibrillation was performed using the IVW method.
Table S6	The main significant results of MR estimation and pleiotropy assessment for 30 kinds of lipid and its related traits on AF/Flutter.
Table S7	Value of F statistic for each instrument of exposure that were causally associated with AF and flutter according to the IVW method

## Sheet: Table S1
Table S1. Summary of exposures and GWAS ID used in our study.
Exposures	GWAS ID	Description	Sample size	Number of SNPs	Ethnics	PMID
Cholesterol to total lipids ratio in IDL	ebi-a-GCST90092832	Cholesterol % (subclasses)	115082	11590399	European	35213538
Cholesterol to total lipids ratio in large HDL	ebi-a-GCST90092845	Cholesterol % (subclasses)	115082	11590399	European	35213538
Cholesterol to total lipids ratio in large LDL	ebi-a-GCST90092857	Cholesterol % (subclasses)	115082	11590399	European	35213538
Cholesterol to total lipids ratio in medium HDL	ebi-a-GCST90092893	Cholesterol % (subclasses)	115082	11590399	European	35213538
Cholesterol to total lipids ratio in medium LDL	ebi-a-GCST90092905	Cholesterol % (subclasses)	115082	11590399	European	35213538
Cholesterol to total lipids ratio in medium VLDL	ebi-a-GCST90092917	Cholesterol % (subclasses)	115082	11590399	European	35213538
Cholesterol to total lipids ratio in small HDL	ebi-a-GCST90092945	Cholesterol % (subclasses)	115082	11590399	European	35213538
Cholesterol to total lipids ratio in small LDL	ebi-a-GCST90092957	Cholesterol % (subclasses)	115082	11590399	European	35213538
Cholesterol to total lipids ratio in small VLDL	ebi-a-GCST90092969	Cholesterol % (subclasses)	115082	11590399	European	35213538
Cholesterol to total lipids ratio in very small VLDL	ebi-a-GCST90093029	Cholesterol % (subclasses)	115082	11590399	European	35213538
Cholesterol to total lipids ratio in large VLDL	ebi-a-GCST90092869	Cholesterol % (subclasses)	115071	11590399	European	35213538
Cholesterol to total lipids ratio in very large HDL	ebi-a-GCST90093005	Cholesterol % (subclasses)	115056	11590399	European	35213538
Cholesterol to total lipids ratio in very large VLDL	ebi-a-GCST90093017	Cholesterol % (subclasses)	114160	11590399	European	35213538
Cholesterol to total lipids ratio in chylomicrons and extremely large VLDL	ebi-a-GCST90093041	Cholesterol % (subclasses)	111638	11590399	European	35213538
Clinical LDL cholesterol	ebi-a-GCST90092814	Cholesterol (major classes)	115082	11590399	European	35213538
HDL cholesterol levels	ebi-a-GCST90092822	Cholesterol (major classes)	115082	11590399	European	35213538
LDL cholesterol levels	ebi-a-GCST90092883	Cholesterol (major classes)	115082	11590399	European	35213538
Remnant cholesterol (non-HDL, non-LDL -cholesterol)	ebi-a-GCST90092943	Cholesterol (major classes)	115082	11590399	European	35213538
Total cholesterol levels	ebi-a-GCST90092985	Cholesterol (major classes)	115082	11590399	European	35213538
Total cholesterol minus HDL-C levels	ebi-a-GCST90092930	Cholesterol (major classes)	115082	11590399	European	35213538
VLDL cholesterol levels	ebi-a-GCST90092996	Cholesterol (major classes)	115082	11590399	European	35213538
Cholesterol levels in chylomicrons and extremely large VLDL	ebi-a-GCST90093040	Cholesterol (subclasses)	115082	11590399	European	35213538
Cholesterol levels in IDL	ebi-a-GCST90092831	Cholesterol (subclasses)	115082	11590399	European	35213538
Cholesterol levels in large HDL	ebi-a-GCST90092844	Cholesterol (subclasses)	115082	11590399	European	35213538
Cholesterol levels in large LDL	ebi-a-GCST90092856	Cholesterol (subclasses)	115082	11590399	European	35213538
Cholesterol levels in large VLDL	ebi-a-GCST90092868	Cholesterol (subclasses)	115082	11590399	European	35213538
Cholesterol levels in medium HDL	ebi-a-GCST90092892	Cholesterol (subclasses)	115082	11590399	European	35213538
Cholesterol levels in medium LDL	ebi-a-GCST90092904	Cholesterol (subclasses)	115082	11590399	European	35213538
Cholesterol levels in medium VLDL	ebi-a-GCST90092916	Cholesterol (subclasses)	115082	11590399	European	35213538
Cholesterol levels in small HDL	ebi-a-GCST90092944	Cholesterol (subclasses)	115082	11590399	European	35213538
Cholesterol levels in small LDL	ebi-a-GCST90092956	Cholesterol (subclasses)	115082	11590399	European	35213538
Cholesterol levels in small VLDL	ebi-a-GCST90092968	Cholesterol (subclasses)	115082	11590399	European	35213538
Cholesterol levels in very large HDL	ebi-a-GCST90093004	Cholesterol (subclasses)	115082	11590399	European	35213538
Cholesterol levels in very large VLDL	ebi-a-GCST90093016	Cholesterol (subclasses)	115082	11590399	European	35213538
Cholesterol levels in very small VLDL	ebi-a-GCST90093028	Cholesterol (subclasses)	115082	11590399	European	35213538
Cholesteryl esters to total lipids ratio in IDL	ebi-a-GCST90092834	Cholesterol esters % (subclasses)	115082	11590399	European	35213538
Cholesteryl esters to total lipids ratio in large HDL	ebi-a-GCST90092847	Cholesterol esters % (subclasses)	115082	11590399	European	35213538
Cholesteryl esters to total lipids ratio in large LDL	ebi-a-GCST90092859	Cholesterol esters % (subclasses)	115082	11590399	European	35213538
Cholesteryl esters to total lipids ratio in medium HDL	ebi-a-GCST90092895	Cholesterol esters % (subclasses)	115082	11590399	European	35213538
Cholesteryl esters to total lipids ratio in medium LDL	ebi-a-GCST90092907	Cholesterol esters % (subclasses)	115082	11590399	European	35213538
Cholesteryl esters to total lipids ratio in medium VLDL	ebi-a-GCST90092919	Cholesterol esters % (subclasses)	115082	11590399	European	35213538
Cholesteryl esters to total lipids ratio in small HDL	ebi-a-GCST90092947	Cholesterol esters % (subclasses)	115082	11590399	European	35213538
Cholesteryl esters to total lipids ratio in small LDL	ebi-a-GCST90092959	Cholesterol esters % (subclasses)	115082	11590399	European	35213538
Cholesteryl esters to total lipids ratio in small VLDL	ebi-a-GCST90092971	Cholesterol esters % (subclasses)	115082	11590399	European	35213538
Cholesteryl esters to total lipids ratio in very small VLDL	ebi-a-GCST90093031	Cholesterol esters % (subclasses)	115082	11590399	European	35213538
Cholesteryl esters to total lipids ratio in large VLDL	ebi-a-GCST90092871	Cholesterol esters % (subclasses)	115071	11590399	European	35213538
Cholesteryl esters to total lipids ratio in very large HDL	ebi-a-GCST90093007	Cholesterol esters % (subclasses)	115056	11590399	European	35213538
Cholesteryl esters to total lipids ratio in very large VLDL	ebi-a-GCST90093019	Cholesterol esters % (subclasses)	114160	11590399	European	35213538
Cholesteryl esters to total lipids ratio in chylomicrons and extremely large VLDL	ebi-a-GCST90093043	Cholesterol esters % (subclasses)	111638	11590399	European	35213538
Total esterified cholesterol levels	ebi-a-GCST90092986	Cholesterol esters(subclasses)	115082	11590399	European	35213538
Cholesteryl esters in chylomicrons and extremely large VLDL	met-d-XXL_VLDL_CE	Cholesterol esters(subclasses)	115078	12321875	European	/
Cholesteryl esters in HDL	met-d-HDL_CE	Cholesterol esters(subclasses)	115078	12321875	European	/
Cholesteryl esters in IDL	met-d-IDL_CE	Cholesterol esters(subclasses)	115078	12321875	European	/
Cholesteryl esters in large HDL	met-d-L_HDL_CE	Cholesterol esters(subclasses)	115078	12321875	European	/
Cholesteryl esters in large LDL	met-d-L_LDL_CE	Cholesterol esters(subclasses)	115078	12321875	European	/
Cholesteryl esters in large VLDL	met-d-L_VLDL_CE	Cholesterol esters(subclasses)	115078	12321875	European	/
Cholesteryl esters in LDL	met-d-LDL_CE	Cholesterol esters(subclasses)	115078	12321875	European	/
Cholesteryl esters in medium HDL	met-d-M_HDL_CE	Cholesterol esters(subclasses)	115078	12321875	European	/
Cholesteryl esters in medium LDL	met-d-M_LDL_CE	Cholesterol esters(subclasses)	115078	12321875	European	/
Cholesteryl esters in medium VLDL	met-d-M_VLDL_CE	Cholesterol esters(subclasses)	115078	12321875	European	/
Cholesteryl esters in small HDL	met-d-S_HDL_CE	Cholesterol esters(subclasses)	115078	12321875	European	/
Cholesteryl esters in small LDL	met-d-S_LDL_CE	Cholesterol esters(subclasses)	115078	12321875	European	/
Cholesteryl esters in small VLDL	met-d-S_VLDL_CE	Cholesterol esters(subclasses)	115078	12321875	European	/
Cholesteryl esters in very large HDL	met-d-XL_HDL_CE	Cholesterol esters(subclasses)	115078	12321875	European	/
Cholesteryl esters in very large VLDL	met-d-XL_VLDL_CE	Cholesterol esters(subclasses)	115078	12321875	European	/
Cholesteryl esters in very small VLDL	met-d-XS_VLDL_CE	Cholesterol esters(subclasses)	115078	12321875	European	/
Cholesteryl esters in VLDL	met-d-VLDL_CE	Cholesterol esters(subclasses)	115078	12321875	European	/
Free cholesterol to total lipids ratio in IDL	ebi-a-GCST90092836	Free cholesterol % (subclasses)	115082	11590399	European	35213538
Free cholesterol to total lipids ratio in large HDL	ebi-a-GCST90092849	Free cholesterol % (subclasses)	115082	11590399	European	35213538
Free cholesterol to total lipids ratio in large LDL	ebi-a-GCST90092861	Free cholesterol % (subclasses)	115082	11590399	European	35213538
Free cholesterol to total lipids ratio in medium HDL	ebi-a-GCST90092897	Free cholesterol % (subclasses)	115082	11590399	European	35213538
Free cholesterol to total lipids ratio in medium LDL	ebi-a-GCST90092909	Free cholesterol % (subclasses)	115082	11590399	European	35213538
Free cholesterol to total lipids ratio in medium VLDL	ebi-a-GCST90092921	Free cholesterol % (subclasses)	115082	11590399	European	35213538
Free cholesterol to total lipids ratio in small HDL	ebi-a-GCST90092949	Free cholesterol % (subclasses)	115082	11590399	European	35213538
Free cholesterol to total lipids ratio in small LDL	ebi-a-GCST90092961	Free cholesterol % (subclasses)	115082	11590399	European	35213538
Free cholesterol to total lipids ratio in small VLDL	ebi-a-GCST90092973	Free cholesterol % (subclasses)	115082	11590399	European	35213538
Free cholesterol to total lipids ratio in very small VLDL	ebi-a-GCST90093033	Free cholesterol % (subclasses)	115082	11590399	European	35213538
Free cholesterol to total lipids ratio in large VLDL	ebi-a-GCST90092873	Free cholesterol % (subclasses)	115071	11590399	European	35213538
Free cholesterol to total lipids ratio in very large HDL	ebi-a-GCST90093009	Free cholesterol % (subclasses)	115056	11590399	European	35213538
Free cholesterol to total lipids ratio in very large VLDL	ebi-a-GCST90093021	Free cholesterol % (subclasses)	114160	11590399	European	35213538
Free cholesterol to total lipids ratio in chylomicrons and extremely large VLDL	ebi-a-GCST90093045	Free cholesterol % (subclasses)	111638	11590399	European	35213538
Free cholesterol levels in chylomicrons and extremely large VLDL	ebi-a-GCST90093044	Free cholesterol (subclasses)	115082	11590399	European	35213538
Free cholesterol levels in HDL	ebi-a-GCST90092824	Free cholesterol (subclasses)	115082	11590399	European	35213538
Free cholesterol levels in IDL	ebi-a-GCST90092835	Free cholesterol (subclasses)	115082	11590399	European	35213538
Free cholesterol levels in large HDL	ebi-a-GCST90092848	Free cholesterol (subclasses)	115082	11590399	European	35213538
Free cholesterol levels in large LDL	ebi-a-GCST90092860	Free cholesterol (subclasses)	115082	11590399	European	35213538
Total free cholesterol levels	ebi-a-GCST90092988	Free cholesterol (subclasses)	115082	11590399	European	35213538
Free cholesterol levels in large VLDL	ebi-a-GCST90092872	Free cholesterol (subclasses)	115082	11590399	European	35213538
Free cholesterol levels in LDL	ebi-a-GCST90092885	Free cholesterol (subclasses)	115082	11590399	European	35213538
Free cholesterol levels in medium HDL	ebi-a-GCST90092896	Free cholesterol (subclasses)	115082	11590399	European	35213538
Free cholesterol levels in medium LDL	ebi-a-GCST90092908	Free cholesterol (subclasses)	115082	11590399	European	35213538
Free cholesterol levels in medium VLDL	ebi-a-GCST90092920	Free cholesterol (subclasses)	115082	11590399	European	35213538
Free cholesterol levels in small HDL	ebi-a-GCST90092948	Free cholesterol (subclasses)	115082	11590399	European	35213538
Free cholesterol levels in small LDL	ebi-a-GCST90092960	Free cholesterol (subclasses)	115082	11590399	European	35213538
Free cholesterol levels in small VLDL	ebi-a-GCST90092972	Free cholesterol (subclasses)	115082	11590399	European	35213538
Free cholesterol levels in very large HDL	ebi-a-GCST90093008	Free cholesterol (subclasses)	115082	11590399	European	35213538
Free cholesterol levels in very large VLDL	ebi-a-GCST90093020	Free cholesterol (subclasses)	115082	11590399	European	35213538
Free cholesterol levels in very small VLDL	ebi-a-GCST90093032	Free cholesterol (subclasses)	115082	11590399	European	35213538
Free cholesterol levels in VLDL	ebi-a-GCST90092998	Free cholesterol (subclasses)	115082	11590399	European	35213538
Phospholipids to total lipids ratio in IDL	ebi-a-GCST90092840	Phospholipids % (subclasses)	115082	11590399	European	35213538
Phospholipids to total lipids ratio in large HDL	ebi-a-GCST90092853	Phospholipids % (subclasses)	115082	11590399	European	35213538
Phospholipids to total lipids ratio in large LDL	ebi-a-GCST90092865	Phospholipids % (subclasses)	115082	11590399	European	35213538
Phospholipids to total lipids ratio in medium HDL	ebi-a-GCST90092901	Phospholipids % (subclasses)	115082	11590399	European	35213538
Phospholipids to total lipids ratio in medium LDL	ebi-a-GCST90092913	Phospholipids % (subclasses)	115082	11590399	European	35213538
Phospholipids to total lipids ratio in medium VLDL	ebi-a-GCST90092925	Phospholipids % (subclasses)	115082	11590399	European	35213538
Phospholipids to total lipids ratio in small HDL	ebi-a-GCST90092953	Phospholipids % (subclasses)	115082	11590399	European	35213538
Phospholipids to total lipids ratio in small LDL	ebi-a-GCST90092965	Phospholipids % (subclasses)	115082	11590399	European	35213538
Phospholipids to total lipids ratio in small VLDL	ebi-a-GCST90092977	Phospholipids % (subclasses)	115082	11590399	European	35213538
Phospholipids to total lipids ratio in very small VLDL	ebi-a-GCST90093037	Phospholipids % (subclasses)	115082	11590399	European	35213538
Phospholipids to total lipids ratio in large VLDL	ebi-a-GCST90092877	Phospholipids % (subclasses)	115071	11590399	European	35213538
Phospholipids to total lipids ratio in very large HDL	ebi-a-GCST90093013	Phospholipids % (subclasses)	115056	11590399	European	35213538
Phospholipids to total lipids ratio in very large VLDL	ebi-a-GCST90093025	Phospholipids % (subclasses)	114160	11590399	European	35213538
Phospholipids to total lipids ratio in chylomicrons and extremely large VLDL	ebi-a-GCST90093049	Phospholipids % (subclasses)	111638	11590399	European	35213538
Phosphatidylcholine levels	ebi-a-GCST90092937	Phospholipids	115006	11590399	European	35213538
Phosphoglycerides levels	ebi-a-GCST90092938	Phospholipids	115006	11590399	European	35213538
Ratio of triglycerides to phosphoglycerides	ebi-a-GCST90092983	Phospholipids	115006	11590399	European	35213538
Sphingomyelin levels	ebi-a-GCST90092982	Phospholipids	115006	11590399	European	35213538
Total cholines	ebi-a-GCST90092812	Phospholipids	115006	11590399	European	35213538
Phospholipids in HDL	met-d-HDL_PL	Phospholipids (major classes)	115078	12321875	European	/
Phospholipids in LDL	met-d-LDL_PL	Phospholipids (major classes)	115078	12321875	European	/
Phospholipids in VLDL	met-d-VLDL_PL	Phospholipids (major classes)	115078	12321875	European	/
Total phospholipids in lipoprotein particles	met-d-Total_PL	Phospholipids (major classes)	115078	12321875	European	/
Phospholipids in chylomicrons and extremely large VLDL	met-d-XXL_VLDL_PL	Phospholipids (subclasses)	115078	12321875	European	/
Phospholipids in IDL	met-d-IDL_PL	Phospholipids (subclasses)	115078	12321875	European	/
Phospholipids in large HDL	met-d-L_HDL_PL	Phospholipids (subclasses)	115078	12321875	European	/
Phospholipids in large LDL	met-d-L_LDL_PL	Phospholipids (subclasses)	115078	12321875	European	/
Phospholipids in large VLDL	met-d-L_VLDL_PL	Phospholipids (subclasses)	115078	12321875	European	/
Phospholipids in medium HDL	met-d-M_HDL_PL	Phospholipids (subclasses)	115078	12321875	European	/
Phospholipids in medium LDL	met-d-M_LDL_PL	Phospholipids (subclasses)	115078	12321875	European	/
Phospholipids in medium VLDL	met-d-M_VLDL_PL	Phospholipids (subclasses)	115078	12321875	European	/
Phospholipids in small HDL	met-d-S_HDL_PL	Phospholipids (subclasses)	115078	12321875	European	/
Phospholipids in small LDL	met-d-S_LDL_PL	Phospholipids (subclasses)	115078	12321875	European	/
Phospholipids in small VLDL	met-d-S_VLDL_PL	Phospholipids (subclasses)	115078	12321875	European	/
Phospholipids in very large HDL	met-d-XL_HDL_PL	Phospholipids (subclasses)	115078	12321875	European	/
Phospholipids in very large VLDL	met-d-XL_VLDL_PL	Phospholipids (subclasses)	115078	12321875	European	/
Phospholipids in very small VLDL	met-d-XS_VLDL_PL	Phospholipids (subclasses)	115078	12321875	European	/
Triglycerides to total lipids ratio in IDL	ebi-a-GCST90092842	Triglycerides % (subclasses)	115082	11590399	European	35213538
Triglycerides to total lipids ratio in large HDL	ebi-a-GCST90092855	Triglycerides % (subclasses)	115082	11590399	European	35213538
Triglycerides to total lipids ratio in large LDL	ebi-a-GCST90092867	Triglycerides % (subclasses)	115082	11590399	European	35213538
Triglycerides to total lipids ratio in medium HDL	ebi-a-GCST90092903	Triglycerides % (subclasses)	115082	11590399	European	35213538
Triglycerides to total lipids ratio in medium LDL	ebi-a-GCST90092915	Triglycerides % (subclasses)	115082	11590399	European	35213538
Triglycerides to total lipids ratio in medium VLDL	ebi-a-GCST90092927	Triglycerides % (subclasses)	115082	11590399	European	35213538
Triglycerides to total lipids ratio in small HDL	ebi-a-GCST90092955	Triglycerides % (subclasses)	115082	11590399	European	35213538
Triglycerides to total lipids ratio in small LDL	ebi-a-GCST90092967	Triglycerides % (subclasses)	115082	11590399	European	35213538
Triglycerides to total lipids ratio in small VLDL	ebi-a-GCST90092979	Triglycerides % (subclasses)	115082	11590399	European	35213538
Triglycerides to total lipids ratio in very small VLDL	ebi-a-GCST90093039	Triglycerides % (subclasses)	115082	11590399	European	35213538
Triglycerides to total lipids ratio in large VLDL	ebi-a-GCST90092879	Triglycerides % (subclasses)	115071	11590399	European	35213538
Triglycerides to total lipids ratio in very large HDL	ebi-a-GCST90093015	Triglycerides % (subclasses)	115056	11590399	European	35213538
Triglycerides to total lipids ratio in very large VLDL	ebi-a-GCST90093027	Triglycerides % (subclasses)	114160	11590399	European	35213538
Triglycerides to total lipids ratio in chylomicrons and extremely large VLDL	ebi-a-GCST90093051	Triglycerides % (subclasses)	111638	11590399	European	35213538
Total triglycerides levels	ebi-a-GCST90092992	Triglycerides (major classes)	115082	11590399	European	35213538
Triglycerides in HDL	met-d-HDL_TG	Triglycerides (major classes)	115078	12321875	European	/
Triglycerides in LDL	met-d-LDL_TG	Triglycerides (major classes)	115078	12321875	European	/
Triglycerides in VLDL	met-d-VLDL_TG	Triglycerides (major classes)	115078	12321875	European	/
Triglycerides in chylomicrons and extremely large VLDL	met-d-XXL_VLDL_TG	Triglycerides (subclasses)	115078	12321875	European	/
Triglycerides in IDL	met-d-IDL_TG	Triglycerides (subclasses)	115078	12321875	European	/
Triglycerides in large HDL	met-d-L_HDL_TG	Triglycerides (subclasses)	115078	12321875	European	/
Triglycerides in large LDL	met-d-L_LDL_TG	Triglycerides (subclasses)	115078	12321875	European	/
Triglycerides in large VLDL	met-d-L_VLDL_TG	Triglycerides (subclasses)	115078	12321875	European	/
Triglycerides in medium HDL	met-d-M_HDL_TG	Triglycerides (subclasses)	115078	12321875	European	/
Triglycerides in medium LDL	met-d-M_LDL_TG	Triglycerides (subclasses)	115078	12321875	European	/
Triglycerides in medium VLDL	met-d-M_VLDL_TG	Triglycerides (subclasses)	115078	12321875	European	/
Triglycerides in small HDL	met-d-S_HDL_TG	Triglycerides (subclasses)	115078	12321875	European	/
Triglycerides in small LDL	met-d-S_LDL_TG	Triglycerides (subclasses)	115078	12321875	European	/
Triglycerides in small VLDL	met-d-S_VLDL_TG	Triglycerides (subclasses)	115078	12321875	European	/
Triglycerides in very large HDL	met-d-XL_HDL_TG	Triglycerides (subclasses)	115078	12321875	European	/
Triglycerides in very large VLDL	met-d-XL_VLDL_TG	Triglycerides (subclasses)	115078	12321875	European	/
Triglycerides in very small VLDL	met-d-XS_VLDL_TG	Triglycerides (subclasses)	115078	12321875	European	/
3-Hydroxybutyrate levels	ebi-a-GCST90092811	Ketone bodies	113594	11590399	European	35213538
Acetoacetate levels	ebi-a-GCST90092804	Ketone bodies	115079	11590399	European	35213538
Acetone levels	ebi-a-GCST90092805	Ketone bodies	115079	11590399	European	35213538
Alanine levels	ebi-a-GCST90092806	Amino acids	115078	11590399	European	35213538
Glutamine levels	ebi-a-GCST90092818	Amino acids	114751	11590399	European	35213538
Glycine levels	ebi-a-GCST90092820	Amino acids	114978	11590399	European	35213538
Histidine levels	ebi-a-GCST90092830	Amino acids	114897	11590399	European	35213538
Isoleucine levels	ebi-a-GCST90092843	Amino acids	115079	11590399	European	35213538
Leucine levels	ebi-a-GCST90092891	Amino acids	115078	11590399	European	35213538
Total concentration of branched-chain amino acids (leucine + isoleucine + valine)	ebi-a-GCST90092984	Amino acids	115051	11590399	European	35213538
Phenylalanine levels	ebi-a-GCST90092936	Amino acids	115030	11590399	European	35213538
Tyrosine levels	ebi-a-GCST90092993	Amino acids	114913	11590399	European	35213538
Valine levels	ebi-a-GCST90092995	Amino acids	115052	11590399	European	35213538
Apolipoprotein A1 levels	ebi-a-GCST90092808	Apolipoproteins	115082	11590399	European	35213538
Apolipoprotein B levels	ebi-a-GCST90092809	Apolipoproteins	115082	11590399	European	35213538
Ratio of apolipoprotein B to apolipoprotein A1 levels	ebi-a-GCST90092810	Apolipoproteins	115082	11590399	European	35213538
Acetate levels	ebi-a-GCST90092803	Miscellaneous	115050	11590399	European	35213538
Acetone levels	ebi-a-GCST90092805	Miscellaneous	115079	11590399	European	35213538
Albumin levels	ebi-a-GCST90092807	Miscellaneous	115064	11590399	European	35213538
Creatinine levels	ebi-a-GCST90092815	Miscellaneous	110051	11590399	European	35213538
Degree of unsaturation	ebi-a-GCST90092994	Fatty acids	115006	11590399	European	35213538
Ratio of docosahexaenoic acid to total fatty acid levels	ebi-a-GCST90092817	Fatty acids	115006	11590399	European	35213538
Docosahexaenoic acid levels	ebi-a-GCST90092816	Fatty acids	115006	11590399	European	35213538
Linoleic acid levels	ebi-a-GCST90092880	Fatty acids	115006	11590399	European	35213538
Ratio of linoleic acid to total fatty acids	ebi-a-GCST90092881	Fatty acids	115006	11590399	European	35213538
Ratio of monounsaturated fatty acids to total fatty acids	ebi-a-GCST90092929	Fatty acids	115006	11590399	European	35213538
Monounsaturated fatty acids	met-d-MUFA	Fatty acids	114999	12321875	European	/
Omega-3 fatty acids	met-d-Omega_3	Fatty acids	114999	12321875	European	/
Ratio of omega-3 fatty acids to total fatty acids	ebi-a-GCST90092932	Fatty acids	115006	11590399	European	35213538
Omega-6 fatty acids	met-d-Omega_6	Fatty acids	114999	12321875	European	/
Ratio of omega-6 fatty acids to total fatty acids	ebi-a-GCST90092935	Fatty acids	115006	11590399	European	35213538
Ratio of polyunsaturated fatty acids to monounsaturated fatty acids	ebi-a-GCST90092940	Fatty acids	115006	11590399	European	35213538
Ratio of polyunsaturated fatty acids to total fatty acids	ebi-a-GCST90092941	Fatty acids	115006	11590399	European	35213538
Polyunsaturated fatty acids	met-d-PUFA	Fatty acids	114999	12321875	European	/
Saturated fatty acids	met-d-SFA	Fatty acids	114999	12321875	European	/
Ratio of saturated fatty acids to total fatty acids	ebi-a-GCST90092981	Fatty acids	115006	11590399	European	35213538
Total fatty acids	met-d-Total_FA	Fatty acids	114999	12321875	European	/
Citrate levels	ebi-a-GCST90092813	Glycolysis related	115068	11590399	European	35213538
Glucose levels	ebi-a-GCST90092819	Glycolysis related	114870	11590399	European	35213538
Lactate levels	ebi-a-GCST90092882	Glycolysis related	114806	11590399	European	35213538
Pyruvate levels	ebi-a-GCST90092942	Glycolysis related	114749	11590399	European	35213538
Glycoprotein acetyls levels	ebi-a-GCST90092821	Inflammation markers	115082	11590399	European	35213538
Average diameter for HDL particles	ebi-a-GCST90092828	Partical size	115082	11590399	European	35213538
Average diameter for LDL particles	ebi-a-GCST90092889	Partical size	115082	11590399	European	35213538
Average diameter for VLDL particles	ebi-a-GCST90093002	Partical size	115082	11590399	European	35213538
Concentration of HDL particles	ebi-a-GCST90092826	Particle concentrations (major classes)	115082	11590399	European	35213538
Concentration of LDL particles	ebi-a-GCST90092887	Particle concentrations (major classes)	115082	11590399	European	35213538
Concentration of VLDL particles	ebi-a-GCST90093000	Particle concentrations (major classes)	115082	11590399	European	35213538
Total concentration of lipoprotein particles	ebi-a-GCST90092990	Particle concentrations (major classes)	115082	11590399	European	35213538
Concentration of chylomicrons and extremely large VLDL particles	ebi-a-GCST90093047	Particle concentrations (subclasses)	115082	11590399	European	35213538
Concentration of IDL particles	ebi-a-GCST90092838	Particle concentrations (subclasses)	115082	11590399	European	35213538
Concentration of large HDL particles	ebi-a-GCST90092851	Particle concentrations (subclasses)	115082	11590399	European	35213538
Concentration of large LDL particles	ebi-a-GCST90092863	Particle concentrations (subclasses)	115082	11590399	European	35213538
Concentration of large VLDL particles	ebi-a-GCST90092875	Particle concentrations (subclasses)	115082	11590399	European	35213538
Concentration of medium HDL particles	ebi-a-GCST90092899	Particle concentrations (subclasses)	115082	11590399	European	35213538
Concentration of medium LDL particles	ebi-a-GCST90092911	Particle concentrations (subclasses)	115082	11590399	European	35213538
Concentration of medium VLDL particles	ebi-a-GCST90092923	Particle concentrations (subclasses)	115082	11590399	European	35213538
Concentration of small HDL particles	ebi-a-GCST90092951	Particle concentrations (subclasses)	115082	11590399	European	35213538
Concentration of small LDL particles	ebi-a-GCST90092963	Particle concentrations (subclasses)	115082	11590399	European	35213538
Concentration of small VLDL particles	ebi-a-GCST90092975	Particle concentrations (subclasses)	115082	11590399	European	35213538
Concentration of very large HDL particles	ebi-a-GCST90093011	Particle concentrations (subclasses)	115082	11590399	European	35213538
Concentration of very large VLDL particles	ebi-a-GCST90093023	Particle concentrations (subclasses)	115082	11590399	European	35213538
Concentration of very small VLDL particles	ebi-a-GCST90093035	Particle concentrations (subclasses)	115082	11590399	European	35213538
Total lipids in HDL	met-d-HDL_L	Total lipids (major classes)	115078	12321875	European	/
Total lipids in LDL	met-d-LDL_L	Total lipids (major classes)	115078	12321875	European	/
Total lipids in lipoprotein particles	met-d-Total_L	Total lipids (major classes)	115078	12321875	European	/
Total lipids in VLDL	met-d-VLDL_L	Total lipids (major classes)	115078	12321875	European	/
Total lipids in chylomicrons and extremely large VLDL	met-d-XXL_VLDL_L	Total lipids (subclasses)	115078	12321875	European	/
Total lipids in IDL	met-d-IDL_L	Total lipids (subclasses)	115078	12321875	European	/
Total lipids in large HDL	met-d-L_HDL_L	Total lipids (subclasses)	115078	12321875	European	/
Total lipids in large LDL	met-d-L_LDL_L	Total lipids (subclasses)	115078	12321875	European	/
Total lipids in large VLDL	met-d-L_VLDL_L	Total lipids (subclasses)	115078	12321875	European	/
Total lipids in medium HDL	met-d-M_HDL_L	Total lipids (subclasses)	115078	12321875	European	/
Total lipids in medium LDL	met-d-M_LDL_L	Total lipids (subclasses)	115078	12321875	European	/
Total lipids in medium VLDL	met-d-M_VLDL_L	Total lipids (subclasses)	115078	12321875	European	/
Total lipids in small HDL	met-d-S_HDL_L	Total lipids (subclasses)	115078	12321875	European	/
Total lipids in small LDL	met-d-S_LDL_L	Total lipids (subclasses)	115078	12321875	European	/
Total lipids in small VLDL	met-d-S_VLDL_L	Total lipids (subclasses)	115078	12321875	European	/
Total lipids in very large HDL	met-d-XL_HDL_L	Total lipids (subclasses)	115078	12321875	European	/
Total lipids in very large VLDL	met-d-XL_VLDL_L	Total lipids (subclasses)	115078	12321875	European	/
Total lipids in very small VLDL	met-d-XS_VLDL_L	Total lipids (subclasses)	115078	12321875	European	/
Exposures	GWAS ID	Description	Sample size	Number of SNPs	Ethnics	PMID
Atrial fibrillation	ebi-a-GCST006414	/	1030836	33519037	European	30061737
Atrial fibrillation and flutter	finn-b-I9_AF	/	138994	16379794	European	/

## Sheet: Table S2
Table S2. The results of MR estimation and pleiotropy assessment for lipids and their related traits on AF.
Note: Causal effects estimated using two-sample MR methods (IVW, Simple mode, weighted median, Weighted mode and MR-Egger method). P value < 0.05 was considered significant in IVW method(in red);Exposure marked with yellow underline indicate the presence of pleiotropy and results were discarded.
Exposure	Outcome	IVW method			Simple mode			Weighted median method			Weighted mode method			MR-Egger method			Cochran’s Q		multiplicative random-effects model	pleiotropy(MR-Egger method)	Number of IVs
		Estimate (OR)	95%CI	P value	Estimate (OR)	95%CI	P value	Estimate (OR)	95%CI	P value	Estimate (OR)	95%CI	P value	Estimate (OR)	95%CI	P value	Q	P value	P value	P value
Cholesterol % (subclasses)
Cholesterol to total lipids ratio in IDL	Atrial fibrillation	1.01049	0.9630384,1.057947	0.666384	1.11864	1.0061474,1.231138	0.0543591	0.998652	0.9419443,1.055359	0.962801	0.980987	0.9328469,1.029126	0.436829	0.959116	0.8861022,1.032130	0.265962	167.661	1.65441e-08	0.666384	0.0720487	81
Cholesterol to total lipids ratio in large HDL	Atrial fibrillation	1.00298	0.9599846,1.045980	0.892022	0.963187	0.8163789,1.109995	0.617838	0.942152	0.8836448,1.000660	0.0459114	0.950408	0.8985490,1.002268	0.0579095	0.951768	0.8857693,1.017767	0.145823	131.878	0.000849219	0.892022	0.0459887	89
Cholesterol to total lipids ratio in large LDL	Atrial fibrillation	1.00228	0.9459720,1.058589	0.936806	1.175	1.0009440,1.349065	0.0743681	0.975516	0.9004092,1.050623	0.5177	0.920476	0.8269412,1.014010	0.0876228	0.951595	0.8420866,1.061102	0.378122	105.25	0.00027677	0.936806	0.283483	65
Cholesterol to total lipids ratio in medium HDL	Atrial fibrillation	0.986263	0.9326489,1.039877	0.61309	1.00481	0.8745763,1.135045	0.942595	0.94777	0.8900148,1.005525	0.0686853	0.956716	0.9048926,1.008538	0.0979833	0.961111	0.8748895,1.047332	0.36986	211.806	3.1939e-13	0.61309	0.454736	87
Cholesterol to total lipids ratio in medium LDL	Atrial fibrillation	1.02915	0.9293882,1.128919	0.572372	0.968546	0.7568759,1.180215	0.768978	0.999647	0.9026762,1.096617	0.994304	0.996093	0.8966025,1.095584	0.938956	0.940019	0.7466105,1.133427	0.534831	124.686	1.04694e-11	0.572372	0.2915696	38
Cholesterol to total lipids ratio in medium VLDL	Atrial fibrillation	1.08503	1.0268505,1.143201	0.00597158	1.01267	0.8918054,1.133545	0.838723	1.01516	0.9518132,1.078496	0.641629	1.00691	0.9345133,1.079303	0.852647	1.02989	0.9334276,1.126344	0.551443	184.824	1.86805e-11	0.00597158	0.189368	79
Cholesterol to total lipids ratio in small HDL	Atrial fibrillation	0.977386	0.9216487,1.0331237	0.421201	0.874829	0.7586595,0.9909982	0.0277128	0.97084	0.9108601,1.0308201	0.333522	0.945656	0.8924463,0.9988655	0.0439184	1.00352	0.9130208,1.0940205	0.939586	141.475	1.56631e-08	0.421201	0.470004	63
Cholesterol to total lipids ratio in small LDL	Atrial fibrillation	1.06069	0.9548092,1.166573	0.275409	1.21911	1.0263492,1.411881	0.0521669	1.09083	0.9933090,1.188354	0.0805822	1.09928	1.0058728,1.192678	0.0553684	1.01479	0.8004568,1.229119	0.894052	102.198	5.31221e-09	0.275409	0.643559	34
Cholesterol to total lipids ratio in small VLDL	Atrial fibrillation	1.06572	1.0173189,1.114129	0.00995279	1.00863	0.8903889,1.126860	0.887252	1.03127	0.9706764,1.091854	0.31929	1.02919	0.9575494,1.100836	0.434108	1.05261	0.9724980,1.132714	0.214406	107.096	0.000445537	0.00995279	0.7038972	67
Cholesterol to total lipids ratio in very small VLDL	Atrial fibrillation	1.01812	0.9684654,1.067766	0.478489	1.02598	0.9215713,1.130393	0.63166	0.999986	0.9410727,1.058900	0.999634	0.997624	0.9287957,1.066453	0.946191	1.02485	0.9405379,1.109165	0.57009	139.753	1.47687e-06	0.4784894	0.8495743	75
Cholesterol to total lipids ratio in large VLDL	Atrial fibrillation	1.10594	1.0470563,1.164827	0.000803149	0.962824	0.8195578,1.106091	0.606299	1.08007	1.0139424,1.146197	0.0224291	1.06569	0.9957120,1.135672	0.0801728	1.11609	1.0170902,1.215091	0.0339912	134.969	1.81454e-08	0.000803149	0.822003	57
Cholesterol to total lipids ratio in very large HDL	Atrial fibrillation	1.00018	0.9489551,1.051396	0.994645	1.02465	0.8953197,1.153982	0.713785	0.999612	0.9447172,1.054507	0.988942	0.987463	0.9439416,1.030983	0.57266	0.998767	0.9254876,1.072045	0.97381	95.1862	2.77003e-05	0.994645	0.957737	50
Cholesterol to total lipids ratio in very large VLDL	Atrial fibrillation	1.10959	1.0519264,1.167253	0.000408276	1.04614	0.8854557,1.206823	0.583932	1.08133	1.0121431,1.150524	0.0267547	1.04614	0.9217814,1.170497	0.479495	1.10146	1.0010061,1.201903	0.0635697	150.995	6.97264e-08	0.000408276	0.860834	74
Cholesterol to total lipids ratio in chylomicrons and extremely large VLDL	Atrial fibrillation	1.17093	1.1090461,1.232818	5.80157e-07	0.959516	0.8056374,1.113395	0.602768	1.22892	1.1547438,1.303104	5.13291e-08	1.19788	1.1267371,1.269015	2.97388e-05	1.22838	1.1341547,1.322596	0.000210876	42.0995	0.042432	5.80157e-07	0.201583	29
Cholesterol (subclasses)
Cholesterol levels in chylomicrons and extremely large VLDL	Atrial fibrillation	0.954679	0.8901587,1.0191984	0.158847	0.0403218	0.7586735,0.9997245	0.0403218	0.979907	0.9157811,1.0440323	0.534991	0.953676	0.8771712,1.0301814	0.228846	0.928502	0.8294242,1.0275795	0.147289	204.324	7.92385e-17	0.158847	0.470113	70
Cholesterol levels in IDL	Atrial fibrillation	1.05418	0.9913594,1.117002	0.0997203	1.00647	0.8782674,1.134673	0.921777	1.04647	0.9783528,1.114580	0.191227	1.05157	0.9778324,1.125307	0.18632	1.0032	0.8933391,1.113061	0.954734	139.977	3.80103e-08	0.0997203	0.285664	64
Cholesterol levels in large HDL	Atrial fibrillation	0.979962	0.9331299,1.026793	0.396905	1.00836	0.8780585,1.138665	0.90057	0.951164	0.8962183,1.006111	0.0741003	0.967495	0.9212358,1.013755	0.164524	0.98004	0.9067507,1.053329	0.590932	235.902	1.29302e-12	0.396906	0.997787	106
Cholesterol levels in large LDL	Atrial fibrillation	1.02509	0.9757862,1.074400	0.324542	0.965063	0.8275855,1.102540	0.614519	1.0313	0.9626748,1.099930	0.378703	1.03261	0.9571085,1.108102	0.409074	1.01014	0.9243104,1.095960	0.818886	59.2764	0.107921	0.324542	0.68228	49
Cholesterol levels in large VLDL	Atrial fibrillation	0.995348	0.9378308,1.052864	0.873737	0.93254	0.8143977,1.050683	0.251245	0.997841	0.9358825,1.059799	0.945483	0.978766	0.9151520,1.042381	0.511014	0.951835	0.8556286,1.048041	0.318746	141.885	8.79477e-09	0.873737	0.261239	64
Cholesterol levels in medium HDL	Atrial fibrillation	0.96834	0.9150350,1.021645	0.236829	0.938803	0.7836253,1.093981	0.427612	0.943768	0.8765785,1.010958	0.0913618	0.948291	0.8749165,1.021666	0.16026	0.969384	0.8773912,1.061376	0.509706	160.695	3.46145e-08	0.236829	0.977531	78
Cholesterol levels in medium LDL	Atrial fibrillation	1.0027	0.9558457,1.049553	0.910209	0.948904	0.8191118,1.078696	0.43233	0.988714	0.9216711,1.055757	0.74002	0.996631	0.9124753,1.080787	0.937691	1.02446	0.9378823,1.111045	0.586932	52.3116	0.275361	0.910209	0.56489	49
Cholesterol levels in medium VLDL	Atrial fibrillation	1.03351	0.9801027,1.086926	0.226399	0.900634	0.7628945,1.038374	0.142709	0.992991	0.9227024,1.063279	0.844504	0.994123	0.9087123,1.079533	0.892941	0.985679	0.8905134,1.080844	0.767653	75.589	0.0112031	0.226399	0.244798	52
Cholesterol levels in small HDL	Atrial fibrillation	0.976912	0.9014681,1.052357	0.543959	0.99097	0.8380986,1.143841	0.907996	1.0678	0.9929008,1.142705	0.0860393	1.0461	0.9737615,1.118444	0.229174	1.12097	0.9836173,1.258333	0.111251	101.309	3.16522e-07	0.543959	0.0268125	43
Cholesterol levels in small LDL	Atrial fibrillation	1.00156	0.9516508,1.051462	0.951304	0.97865	0.8559855,1.101316	0.731616	0.988769	0.9234059,1.054133	0.734856	1.00437	0.9313710,1.077365	0.90729	0.993545	0.9069649,1.080125	0.884025	72.1283	0.0337652	0.951304	0.824027	54
Cholesterol levels in small VLDL	Atrial fibrillation	1.04256	0.9939119,1.091203	0.093109	0.946073	0.8171851,1.074961	0.402135	0.998833	0.9370206,1.060645	0.970458	0.977368	0.8933387,1.061398	0.59509	0.986179	0.8963737,1.075985	0.762256	108.365	0.00174304	0.093109	0.154772	71
Cholesterol levels in very large HDL	Atrial fibrillation	1.01508	0.9666853,1.063470	0.544432	0.970727	0.8365159,1.104939	0.665429	0.955631	0.9030421,1.008220	0.0907539	0.978075	0.9312150,1.024936	0.356315	0.964108	0.8919888,1.036227	0.323241	202.587	7.73198e-11	0.544432	0.065138	93
Cholesterol levels in very large VLDL	Atrial fibrillation	0.985696	0.9272016,1.044191	0.629286	0.929789	0.7797718,1.079806	0.345494	0.998415	0.9290518,1.067778	0.964251	0.987071	0.9182934,1.055850	0.712114	0.946745	0.8511781,1.042312	0.266411	135.072	4.34233e-08	0.629286	0.300362	64
Cholesterol levels in very small VLDL	Atrial fibrillation	1.06164	1.0146916,1.108599	0.0125221	1.06396	0.9561771,1.171734	0.263996	1.07847	1.0182779,1.138669	0.0138999	1.06885	1.0115195,1.126176	0.0263473	1.04214	0.9638571,1.120419	0.30555	101.457	0.000882311	0.0125221	0.562675	63
Cholesterol (major classes)
Clinical LDL cholesterol	Atrial fibrillation	1.02599	0.9755790,1.076399	0.318487	1.00125	0.8671313,1.135362	0.985554	1.01622	0.9486759,1.083774	0.6405	1.03408	0.9566830,1.111475	0.400568	1.01115	0.9271905,1.095115	0.796915	59.6769	0.0702848	0.318487	0.671159	47
HDL cholesterol levels	Atrial fibrillation	0.978626	0.9312822,1.025970	0.371072	0.987075	0.8564119,1.117738	0.845779	0.953457	0.8924487,1.014466	0.125726	0.951157	0.8955430,1.006772	0.0814626	0.961609	0.8834230,1.039794	0.329442	154.081	9.08634e-07	0.371072	0.581169	86
LDL cholesterol levels	Atrial fibrillation	1.01751	0.9660976,1.068926	0.508095	0.954467	0.8301067,1.078827	0.466551	1.00709	0.9383077,1.075862	0.840544	1.02929	0.9500435,1.108546	0.478939	1.00876	0.9189941,1.098525	0.84987	58.8907	0.0659905	0.508095	0.818131	46
Remnant cholesterol (non-HDL, non-LDL -cholesterol)	Atrial fibrillation	1.03562	0.9856955,1.085545	0.169414	0.964777	0.8226925,1.106862	0.622976	0.997248	0.9304171,1.064079	0.935585	0.979648	0.8872963,1.072000	0.664394	0.959791	0.8684164,1.051166	0.382911	70.8865	0.0341305	0.169414	0.0596931	53
Total cholesterol levels	Atrial fibrillation	1.02402	0.9761280,1.071923	0.331293	1.07106	0.9210491,1.221081	0.37344	1.04497	0.9751813,1.114760	0.216681	1.08508	0.9853218,1.184829	0.114084	1.03668	0.9425414,1.130823	0.456314	70.3489	0.128202	0.331293	0.766857	59
Total cholesterol minus HDL-C levels	Atrial fibrillation	1.01979	0.9755092,1.064073	0.385704	0.952509	0.8131586,1.091860	0.497045	0.998308	0.9287660,1.067849	0.961921	1.00587	0.9188589,1.092891	0.895584	1.00588	0.9252516,1.086501	0.887343	49.67	0.406553	0.385704	0.690086	51
VLDL cholesterol levels	Atrial fibrillation	1.03477	0.9812486,1.088297	0.210678	0.918955	0.7909957,1.046914	0.199837	0.996705	0.9324323,1.060977	0.919823	0.97404	0.9010859,1.046995	0.482202	0.934043	0.8356160,1.032471	0.178792	125.455	2.78818e-05	0.210678	0.019303	70
Cholesterol esters % (subclasses)
Cholesteryl esters to total lipids ratio in IDL	Atrial fibrillation	0.994975	0.9463631,1.043586	0.839032	1.08072	0.9615727,1.199876	0.206142	0.990669	0.9296142,1.051724	0.763452	0.971804	0.9151548,1.028453	0.326053	0.978888	0.9010966,1.056679	0.592701	125.282	1.05083e-05	0.839032	0.599362	68
Cholesteryl esters to total lipids ratio in large HDL	Atrial fibrillation	0.992588	0.9453189,1.0398564	0.757705	0.954946	0.8031200,1.1067716	0.553542	0.940785	0.8798993,1.0016697	0.0494118	0.943638	0.8901329,0.9971433	0.0368708	0.948705	0.8739883,1.0234216	0.171333	125.179	0.000249617	0.757705	0.132052	80
Cholesteryl esters to total lipids ratio in large LDL	Atrial fibrillation	0.938144	0.8716111,1.0046777	0.0599725	0.925066	0.7950814,1.0550503	0.248606	0.910281	0.8298107,0.9907510	0.0220448	0.918033	0.8374235,0.9986432	0.0454246	0.876196	0.7303172,1.0220756	0.0852875	55.4037	0.00861887	0.05997253	0.3102236	35
Cholesteryl esters to total lipids ratio in medium HDL	Atrial fibrillation	0.999711	0.9360184,1.063405	0.992917	0.941192	0.8036030,1.078781	0.390753	0.985732	0.9202522,1.051211	0.667069	0.95569	0.8950761,1.016303	0.14707	0.954067	0.8498543,1.058279	0.379441	222.389	5.22795e-17	0.992917	0.270927	78
Cholesteryl esters to total lipids ratio in medium LDL	Atrial fibrillation	0.947514	0.8882676,1.0067594	0.0744868	0.779161	0.6232143,0.9351076	0.0032492	0.949605	0.8773310,1.0218785	0.160821	0.929231	0.8351626,1.0232995	0.134259	0.960424	0.8565811,1.0642666	0.450663	69.0801	0.00210801	0.07448683	0.7561261	43
Cholesteryl esters to total lipids ratio in medium VLDL	Atrial fibrillation	1.0811	1.0231592,1.139039	0.00834316	1.00509	0.8787301,1.131450	0.937444	1.00511	0.9409001,1.069329	0.876261	0.999474	0.9224779,1.076470	0.989346	1.03553	0.9396561,1.131395	0.477688	183.922	2.46666e-11	0.00834316	0.273107	79
Cholesteryl esters to total lipids ratio in small HDL	Atrial fibrillation	0.999541	0.9410100,1.058071	0.987723	1.01233	0.9078197,1.116840	0.819117	0.963703	0.9114403,1.015966	0.165575	0.960579	0.9145249,1.006633	0.0928032	0.962627	0.8762547,1.048999	0.391366	155.898	4.57744e-12	0.987723	0.25213	56
Cholesteryl esters to total lipids ratio in small LDL	Atrial fibrillation	0.98328	0.9185132,1.048048	0.609875	0.984098	0.8396684,1.128527	0.828867	1.00129	0.9286890,1.073892	0.972228	1.00503	0.9323161,1.077746	0.893057	0.920533	0.8109883,1.030078	0.146303	107.691	6.73654e-08	0.609875	0.154116	46
Cholesteryl esters to total lipids ratio in small VLDL	Atrial fibrillation	1.10076	1.0453391,1.156178	0.000685837	1.02211	0.8839769,1.160235	0.757358	1.05964	0.9968981,1.122382	0.0703489	1.04563	0.9862469,1.105014	0.145653	1.06299	0.9734345,1.152536	0.185993	145.231	4.56699e-08	0.000685837	0.334113	70
Cholesteryl esters to total lipids ratio in very small VLDL	Atrial fibrillation	1.01612	0.9611653,1.071074	0.568453	1.01851	0.9090628,1.127961	0.743453	0.999636	0.9396688,1.059603	0.990499	0.993311	0.9340916,1.052531	0.824815	1.01876	0.9277564,1.109773	0.690016	188.532	1.53141e-11	0.568453	0.943974	81
Cholesteryl esters to total lipids ratio in large VLDL	Atrial fibrillation	1.0818	1.0312202,1.132390	0.00231373	1.02727	0.8883004,1.166249	0.705627	1.10017	1.0330423,1.167307	0.00531464	1.09941	1.0285234,1.170298	0.0110675	1.1494	1.0655812,1.233219	0.00186054	111.097	9.3926e-05	0.00231373	0.083378	65
Cholesteryl esters to total lipids ratio in very large HDL	Atrial fibrillation	0.983779	0.9230143,1.044544	0.597851	0.982614	0.8543973,1.110831	0.789993	0.968638	0.9008640,1.036412	0.356789	0.948087	0.8823975,1.013775	0.119567	0.936405	0.8301335,1.042677	0.232859	75.1876	0.000633027	0.597851	0.274655	42
Cholesteryl esters to total lipids ratio in very large VLDL	Atrial fibrillation	1.09589	1.038141,1.153631	0.00188453	1.18941	1.034707,1.344121	0.031289	1.0808	1.008871,1.152723	0.0342331	1.18941	1.065935,1.312893	0.00750835	1.1006	1.003972,1.197220	0.0559327	154.303	2.74222e-08	0.00188453	0.913566	74
Cholesteryl esters to total lipids ratio in chylomicrons and extremely large VLDL	Atrial fibrillation	1.18338	1.120648,1.246103	1.433e-07	1.20256	1.077635,1.327482	0.00818565	1.23701	1.161200,1.312824	3.81934e-08	1.20687	1.134834,1.278904	3.49939e-05	1.30078	1.198362,1.403201	4.87168e-05	31.2448	0.116897	1.433e-07	0.0387871	24
Cholesterol esters(subclasses)
Total esterified cholesterol levels	Atrial fibrillation	1.02631	0.9770814,1.075535	0.301163	1.11459	0.9732590,1.255919	0.137786	1.04819	0.9812812,1.115090	0.167997	1.09167	0.9947314,1.188614	0.0813268	1.02174	0.9249527,1.118537	0.664739	74.8638	0.0797158	0.301163	0.916644	60
Cholesteryl esters in chylomicrons and extremely large VLDL	Atrial fibrillation	0.95216	0.8927280,1.011592	0.105941	0.87522	0.7448998,1.005541	0.0492504	0.979276	0.9170827,1.041469	0.509268	0.959719	0.8874151,1.032022	0.269216	0.943839	0.8520936,1.035585	0.221491	184.471	1.29974e-13	0.105941	0.805349	70
Cholesteryl esters in HDL	Atrial fibrillation	0.975002	0.9283155,1.021688	0.287864	0.992354	0.8570347,1.127673	0.911723	0.953191	0.8935315,1.012851	0.115264	0.951117	0.8904044,1.011829	0.109123	0.965798	0.8895409,1.042055	0.373457	174.161	3.62157e-07	0.287864	0.757842	97
Cholesteryl esters in IDL	Atrial fibrillation	1.05733	0.9910792,1.123578	0.0990983	1.03391	0.9099377,1.157882	0.599917	1.0441	0.9759268,1.112272	0.214709	1.04539	0.9640039,1.126777	0.289197	0.996417	0.8807320,1.112102	0.951709	155.826	4.93585e-10	0.0990983	0.225696	65
Cholesteryl esters in large HDL	Atrial fibrillation	0.986862	0.9375627,1.036161	0.599022	1.04568	0.9158668,1.175487	0.501575	0.96553	0.9138561,1.017203	0.183338	0.969207	0.9229066,1.015507	0.188416	0.960854	0.8843187,1.037388	0.308887	265.037	3.10705e-16	0.599022	0.373002	108
Cholesteryl esters in large LDL	Atrial fibrillation	1.02816	0.9793077,1.077022	0.265166	0.995901	0.8717554,1.120048	0.94856	1.00112	0.9314174,1.070831	0.974796	1.03487	0.9524177,1.117318	0.419077	1.00286	0.9170525,1.088658	0.948339	62.5515	0.109596	0.265166	0.490748	52
Cholesteryl esters in large VLDL	Atrial fibrillation	1.01113	0.9548094,1.067448	0.700116	0.928324	0.8153986,1.041250	0.201616	0.999677	0.9334630,1.065891	0.992366	0.998002	0.9373291,1.058675	0.948693	0.948991	0.8547819,1.043201	0.280405	137.401	8.06822e-08	0.700116	0.107509	66
Cholesteryl esters in LDL	Atrial fibrillation	1.02029	0.9716671,1.068911	0.41812	0.952338	0.8116794,1.092997	0.499535	0.994158	0.9275757,1.060739	0.863052	1.01008	0.9187850,1.101376	0.830439	0.983133	0.8969739,1.069292	0.700555	56.5975	0.15931	0.41812	0.312119	49
Cholesteryl esters in medium HDL	Atrial fibrillation	0.974846	0.9205066,1.029185	0.358145	0.920637	0.7237685,1.117507	0.412819	0.964366	0.8954837,1.033247	0.301853	0.924744	0.7599752,1.089513	0.354819	0.98279	0.8785082,1.087072	0.745075	137.595	6.67242e-05	0.358145	0.85829	83
Cholesteryl esters in medium LDL	Atrial fibrillation	1.00596	0.9565741,1.055343	0.8136	0.977838	0.8548299,1.100846	0.722433	0.993904	0.9275845,1.060223	0.856592	0.989191	0.9045932,1.073788	0.802168	0.984333	0.8918202,1.076845	0.739299	68.044	0.0799331	0.8136	0.587426	54
Cholesteryl esters in medium VLDL	Atrial fibrillation	1.05417	0.9966575,1.111689	0.0722043	0.963266	0.8238402,1.102692	0.601182	0.998904	0.9284337,1.069375	0.975673	1.01065	0.9307066,1.090603	0.796083	1.00575	0.9068867,1.104604	0.910044	82.77	0.00182415	0.0722043	0.258074	51
Cholesteryl esters in small HDL	Atrial fibrillation	0.979424	0.9129748,1.045873	0.539706	0.842965	0.6717765,1.014154	0.0574882	1.02146	0.9530878,1.089835	0.542723	1.02007	0.9506482,1.089500	0.577854	1.04606	0.9307050,1.161413	0.448811	92.8496	4.36494e-06	0.539706	0.181283	42
Cholesteryl esters in small LDL	Atrial fibrillation	1.00169	0.9525255,1.050847	0.946445	0.975275	0.8599624,1.090588	0.672168	0.992228	0.9242954,1.060161	0.821899	0.994107	0.9128283,1.075386	0.887206	0.984629	0.8953830,1.073875	0.735075	71.4855	0.0460765	0.946445	0.652106	55
Cholesteryl esters in small VLDL	Atrial fibrillation	1.03812	0.9893257,1.086909	0.132906	0.950938	0.8350957,1.066780	0.397351	1.00677	0.9489747,1.064574	0.81891	1.01772	0.9542592,1.081187	0.589019	1.01777	0.9299575,1.105586	0.695304	141.285	8.06612e-06	0.132906	0.595969	78
Cholesteryl esters in very large HDL	Atrial fibrillation	1.00942	0.9602818,1.058555	0.708453	0.994053	0.8489640,1.139143	0.935949	0.949875	0.8943483,1.005401	0.0694864	0.977953	0.9322476,1.023659	0.341473	0.972813	0.8993627,1.046264	0.463842	228.053	9.37441e-13	0.708453	0.189356	102
Cholesteryl esters in very large VLDL	Atrial fibrillation	1.00816	0.9553084,1.061016	0.763069	0.92499	0.8049508,1.045030	0.20744	1.0008	0.9376539,1.063940	0.980267	1.00236	0.9409754,1.063749	0.940176	0.978796	0.8874113,1.070181	0.64729	136.369	8.15038e-07	0.763069	0.439177	70
Cholesteryl esters in very small VLDL	Atrial fibrillation	1.07059	1.0089986 1.132173	0.0299584	1.05156	0.9403886 1.162732	0.379499	1.07199	1.0124085 1.131569	0.022205	1.07169	1.0140070 1.129371	0.0224622	1.02289	0.9173047 1.128471	0.676185	129.661	1.42405e-08	0.0299584	0.302696	54
Cholesteryl esters in VLDL	Atrial fibrillation	1.03942	0.9840642,1.094776	0.171015	0.943088	0.8234870,1.062689	0.340654	1.00237	0.9397976,1.064943	0.940888	1.00545	0.9370559,1.073846	0.876713	0.956251	0.8570820,1.055419	0.38008	124.428	4.45063e-06	0.171015	0.0537323	65
Free cholesterol % (subclasses)
Free cholesterol to total lipids ratio in IDL	Atrial fibrillation	1.00917	0.9417776,1.076558	0.790685	1.03128	0.8677557,1.194806	0.713722	1.00023	0.9196412,1.080815	0.995572	1.02574	0.9487379,1.102734	0.52103	1.01166	0.8955512,1.127760	0.845804	96.9986	1.11262e-05	0.790685	0.959284	51
Free cholesterol to total lipids ratio in large HDL	Atrial fibrillation	1.0443	0.9919741,1.096627	0.104447	1.0668	0.9685721,1.165027	0.201749	1.04384	0.9863402,1.101349	0.143583	1.02879	0.9821995,1.075376	0.23702	0.971948	0.8937088,1.050187	0.478694	144.053	1.76814e-08	0.104447	0.0217456	66
Free cholesterol to total lipids ratio in large LDL	Atrial fibrillation	1.01827	0.9660528,1.070484	0.496789	0.934387	0.8114592,1.057314	0.282357	1.00075	0.9401253,1.061380	0.980593	0.99449	0.9367243,1.052255	0.851733	1.03908	0.9576801,1.120478	0.358683	192.486	1.106e-10	0.496789	0.526144	88
Free cholesterol to total lipids ratio in medium HDL	Atrial fibrillation	1.00207	0.9479589,1.056172	0.940414	0.991128	0.8465895,1.135667	0.904115	0.951447	0.8944169,1.008478	0.0871714	0.982788	0.9288597,1.036715	0.529773	0.995516	0.9092819,1.081750	0.918889	219.54	1.69272e-14	0.940414	0.848095	86
Free cholesterol to total lipids ratio in medium LDL	Atrial fibrillation	1.03113	0.9696829,1.092579	0.328154	1.07901	0.9416131,1.216408	0.281537	1.00237	0.9391011,1.065635	0.941584	1.00761	0.9441500,1.071062	0.815597	1.05852	0.9640308,1.153010	0.24195	231.517	4.01325e-18	0.328154	0.4753099	80
Free cholesterol to total lipids ratio in medium VLDL	Atrial fibrillation	1.07634	1.0253714,1.127316	0.0046704	1.10301	0.9753283,1.230689	0.13695	1.02424	0.9619490,1.086520	0.451139	1.02683	0.9508310,1.102830	0.497034	1.07755	0.9861882,1.168915	0.113785	126.102	2.37892e-05	0.0046704	0.976874	72
Free cholesterol to total lipids ratio in small HDL	Atrial fibrillation	1.0183	0.9811736,1.055419	0.338431	0.972474	0.8668719,1.078077	0.606062	1.00585	0.9556470,1.056044	0.819974	1.00987	0.9717941,1.047949	0.614703	1.00115	0.9473837,1.054920	0.966642	116.298	0.000427594	0.338431	0.394371	75
Free cholesterol to total lipids ratio in small LDL	Atrial fibrillation	1.03386	0.9829677,1.084747	0.199696	1.18547	1.0565301,1.314420	0.011785	1.01185	0.9519080,1.071794	0.700069	0.993471	0.9303077,1.056634	0.839517	1.03435	0.9558061,1.112898	0.402247	164.695	1.33132e-09	0.199696	0.98748	75
Free cholesterol to total lipids ratio in small VLDL	Atrial fibrillation	1.05648	0.9974679,1.115502	0.068025	1.07075	0.9486610,1.192838	0.276111	1.00072	0.9383261,1.063115	0.98195	1.00748	0.9385304,1.076426	0.832865	1.0273	0.9289008,1.125710	0.593243	194.18	3.64429e-13	0.068025	0.487104	76
Free cholesterol to total lipids ratio in very small VLDL	Atrial fibrillation	1.0588	1.0010177,1.116588	0.0526134	1.07166	0.9480046,1.195306	0.278018	1.02429	0.9585196,1.090060	0.474486	1.05409	0.9777885,1.130386	0.182219	0.98506	0.8835646,1.086555	0.772537	92.7817	0.000159867	0.0526134	0.0991861	53
Free cholesterol to total lipids ratio in large VLDL	Atrial fibrillation	1.08399	1.0116313,1.156345	0.0289209	1.00004	0.8330792,1.166992	0.999669	1.13146	1.0500302,1.212899	0.00295131	1.10908	1.0150274,1.203130	0.036341	1.20803	1.0762777,1.339777	0.00733656	102.457	2.2701e-06	0.0289209	0.0631895	47
Free cholesterol to total lipids ratio in very large HDL	Atrial fibrillation	1.03467	0.9896572,1.079675	0.137802	1.00389	0.8857836,1.121993	0.94881	1.05023	0.9944065,1.106056	0.0852964	1.02591	0.9855898,1.066228	0.217334	1.00577	0.9398123,1.071717	0.864798	147.05	7.33771e-06	0.137802	0.253674	84
Free cholesterol to total lipids ratio in very large VLDL	Atrial fibrillation	1.10671	1.0401956,1.173217	0.00280988	1.17613	1.0003392,1.351918	0.0754937	1.04935	0.9791070,1.119597	0.178904	1.04169	0.9425827,1.140793	0.422433	1.12096	0.9932138,1.248702	0.0849805	147.999	2.15627e-09	0.00280988	0.818393	63
Free cholesterol to total lipids ratio in chylomicrons and extremely large VLDL	Atrial fibrillation	1.13998	1.0783110,1.201653	3.13018e-05	1.02138	0.8572201,1.185545	0.80256	1.18318	1.1036270,1.262733	3.41011e-05	1.17684	1.1048139,1.248875	0.000150943	1.22302	1.1298186,1.316215	0.000271218	37.9403	0.0613382	3.13018e-05	0.0683242	30
Free cholesterol (subclasses)
Free cholesterol levels in chylomicrons and extremely large VLDL	Atrial fibrillation	0.946783	0.8823502,1.0112150	0.0962097	0.850681	0.7134253,0.9879378	0.0242721	0.966524	0.9005230,1.0325242	0.31194	0.946489	0.8626891,1.0302885	0.203117	0.924579	0.8261626,1.0229964	0.123536	196.868	5.97724e-16	0.0962097	0.532646	68
Free cholesterol levels in HDL	Atrial fibrillation	0.983488	0.9370794,1.029897	0.481953	0.906599	0.7591169,1.054082	0.196575	0.952461	0.8930069,1.011916	0.108349	0.970591	0.9073680,1.033815	0.357779	0.992178	0.9148991,1.069457	0.842687	138.116	9.05522e-06	0.481953	0.780249	76
Free cholesterol levels in IDL	Atrial fibrillation	1.05792	0.9941209,1.121717	0.0836733	1.05494	0.9360739,1.173802	0.381479	1.04935	0.9822258,1.116472	0.159556	1.07305	0.9999906,1.146104	0.0635577	1.00741	0.8939764,1.120840	0.898967	138.857	1.39373e-08	0.0836733	0.311007	60
Free cholesterol levels in large HDL	Atrial fibrillation	0.996913	0.9508924,1.042934	0.895254	1.00235	0.8738074,1.130884	0.971583	0.951109	0.8967317,1.005486	0.0707919	0.972114	0.9272796,1.016949	0.219606	0.95518	0.8858152,1.024545	0.198501	184.976	7.2115e-09	0.895254	0.112343	92
Free cholesterol levels in large LDL	Atrial fibrillation	1.04708	0.9824173,1.111733	0.163186	1.09616	0.9723359,1.219988	0.151622	1.02222	0.9555989,1.088840	0.517928	1.04925	0.9807181,1.117787	0.17452	0.985582	0.8776181,1.093545	0.793009	133.504	4.44282e-08	0.163186	0.177299	58
Total free cholesterol levels	Atrial fibrillation	1.04152	0.9921340,1.090898	0.106417	0.939084	0.8003532,1.077814	0.378048	1.04552	0.9798875,1.111153	0.183734	1.0751	0.9876643,1.162532	0.109692	0.982549	0.8920403,1.073057	0.704359	82.4643	0.0350015	0.106417	0.138933	62
Free cholesterol levels in large VLDL	Atrial fibrillation	0.971074	0.9067353,1.035412	0.371215	0.939407	0.8041427,1.074672	0.368768	0.997973	0.9302788,1.065668	0.953162	0.99268	0.9282236,1.057137	0.823999	0.942141	0.8367725,1.047510	0.272163	174.033	2.77531e-13	0.371215	0.479171	66
Free cholesterol levels in LDL	Atrial fibrillation	1.04195	0.9736101,1.110284	0.238577	1.02395	0.9023037,1.145593	0.704722	1.01447	0.9470107,1.081922	0.676444	1.04412	0.9728484,1.115396	0.241191	0.975367	0.8629574,1.087776	0.665718	115.415	6.85359e-08	0.238577	0.156649	48
Free cholesterol levels in medium HDL	Atrial fibrillation	0.987428	0.9364246,1.038432	0.626843	0.925659	0.7713133,1.080004	0.329936	0.944597	0.8845791,1.004615	0.0626949	0.962704	0.8940851,1.031322	0.281285	0.955457	0.8683509,1.042564	0.308768	144.99	5.33243e-07	0.626843	0.363784	73
Free cholesterol levels in medium LDL	Atrial fibrillation	1.01841	0.9656055,1.071220	0.498287	0.978789	0.8512421,1.106335	0.743241	1.01546	0.9476884,1.083236	0.657227	1.03847	0.9653868,1.111547	0.316456	1.03855	0.9511512,1.125955	0.400565	71.9529	0.0141844	0.498287	0.582567	50
Free cholesterol levels in medium VLDL	Atrial fibrillation	1.02374	0.9743030,1.073173	0.352283	0.942422	0.8224126,1.062432	0.33643	0.994893	0.9272493,1.062536	0.882051	0.9817	0.9046417,1.058759	0.640121	0.969309	0.8784706,1.060147	0.503665	94.2539	0.00825047	0.352283	0.166199	66
Free cholesterol levels in small HDL	Atrial fibrillation	0.977279	0.9083347,1.046223	0.513509	1.03023	0.8711649,1.189287	0.715312	0.992445	0.9116422,1.073248	0.854047	1.05217	0.9596883,1.144650	0.286634	1.03926	0.8972977,1.181212	0.597544	104.842	2.6743e-06	0.513509	0.336448	49
Free cholesterol levels in small LDL	Atrial fibrillation	1.01769	0.9654601,1.069926	0.510466	1.01258	0.8981021,1.127064	0.831335	1.00174	0.9357669,1.067715	0.958781	1.03887	0.9808030,1.096936	0.203849	1.02323	0.9402098,1.106252	0.59011	86.9	0.00128108	0.510466	0.868917	53
Free cholesterol levels in small VLDL	Atrial fibrillation	1.04445	0.9905417,1.098349	0.113832	0.948917	0.8152353,1.082599	0.4451	0.996457	0.9332342,1.059680	0.912389	0.994138	0.9088202,1.079456	0.893028	0.96611	0.8680536,1.064167	0.49348	104.079	0.000267465	0.113832	0.0694413	61
Free cholesterol levels in very large HDL	Atrial fibrillation	1.03326	0.9830101,1.083517	0.20187	1.08025	0.9506824,1.209812	0.246678	0.9976	0.9344058,1.060795	0.940603	1.01009	0.9570102,1.063168	0.711932	0.980795	0.9036636,1.057926	0.62365	148.868	1.64897e-09	0.20445	0.500736	65
Free cholesterol levels in very large VLDL	Atrial fibrillation	0.962515	0.9035052,1.021525	0.20445	0.928354	0.7859527,1.070754	0.310298	0.982512	0.9140237,1.051000	0.61363	0.986374	0.9212904,1.051458	0.680959	0.938739	0.8451989,1.032280	0.190403	148.868	1.64897e-09	0.20445	0.500736	67
Free cholesterol levels in very small VLDL	Atrial fibrillation	1.04672	1.0015959,1.091846	0.0473295	0.961375	0.8478315,1.074919	0.499101	1.05669	1.0017675,1.111614	0.04909	1.04811	0.9965769,1.099647	0.0788808	1.0439	0.9676346,1.120170	0.273924	99.2837	0.00141688	0.0473295	0.931492	63
Free cholesterol levels in VLDL	Atrial fibrillation	1.01569	0.9609204,1.070453	0.577495	0.911863	0.7739417,1.049785	0.194634	0.999728	0.9321346,1.067321	0.993698	0.973939	0.8987825,1.049096	0.49362	0.94912	0.8505103,1.047730	0.303398	130.664	8.20968e-07	0.577495	0.112307	65
Phospholipids % (subclasses)
Phospholipids to total lipids ratio in IDL	Atrial fibrillation	1.00406	0.9460701,1.062045	0.891134	0.942567	0.8158851,1.069249	0.365229	1.00044	0.9282137,1.072676	0.990369	1.00554	0.9395536,1.071518	0.870505	1.04023	0.9395579,1.140898	0.446856	87.9513	6.33128e-05	0.891134	0.403267	44
Phospholipids to total lipids ratio in large HDL	Atrial fibrillation	0.986362	0.9289909,1.043733	0.638974	0.974294	0.8276457,1.120943	0.728771	1.01494	0.9488319,1.081044	0.66021	1.04216	0.9760729,1.108245	0.224511	1.05095	0.9465133,1.155377	0.354065	159.303	5.08819e-08	0.638974	0.159683	78
Phospholipids to total lipids ratio in large LDL	Atrial fibrillation	1.03385	0.9858517,1.081848	0.174027	1.01485	0.9548868,1.074817	0.629896	1.01485	0.9548868,1.074817	0.629896	1.02138	0.9715242,1.071228	0.410466	1.00413	0.9252816,1.082980	0.918891	70.4864	0.00283333	0.174027	0.365715	44
Phospholipids to total lipids ratio in medium HDL	Atrial fibrillation	1.00078	0.9382948,1.063272	0.980407	0.927028	0.7458454,1.108210	0.414861	1.04494	0.9753270,1.114548	0.215834	1.05983	0.9959319,1.123722	0.0785247	1.0352	0.9301367,1.140260	0.52059	215.618	1.29491e-14	0.980407	0.43444	83
Phospholipids to total lipids ratio in medium LDL	Atrial fibrillation	1.02368	0.9565831,1.090774	0.494205	1.16586	1.0126864,1.319027	0.0575528	1.01973	0.9532193,1.086234	0.564823	0.997393	0.9327257,1.062060	0.93738	1.0031	0.8937038,1.112501	0.956064	94.114	2.56808e-07	0.494205	0.645753	39
Phospholipids to total lipids ratio in medium VLDL	Atrial fibrillation	1.09158	1.0335927,1.149572	0.00305887	1.05818	0.9539338,1.162427	0.291932	1.05996	1.0014790,1.118438	0.050982	1.04747	0.9801756,1.114759	0.181843	1.05546	0.9533627,1.157563	0.304322	138.126	4.23857e-08	0.00305887	0.434993	62
Phospholipids to total lipids ratio in small HDL	Atrial fibrillation	0.988769	0.9313667,1.046171	0.69975	0.94763	0.8209385,1.074322	0.408503	0.997408	0.9288955,1.065920	0.940813	1.00598	0.9238877,1.088067	0.887314	1.01276	0.9164145,1.109099	0.797364	135.742	1.97671e-07	0.69975	0.544831	65
Phospholipids to total lipids ratio in small LDL	Atrial fibrillation	1.02188	0.9542456,1.089516	0.530499	0.962083	0.8171776,1.106989	0.603769	0.9993	0.9233425,1.075258	0.985587	0.987348	0.9072880,1.067408	0.756765	1.10464	0.9887756,1.220501	0.0996976	116.247	1.16137e-08	0.530499	0.115376	48
Phospholipids to total lipids ratio in small VLDL	Atrial fibrillation	1.05243	0.9920391,1.112825	0.0972116	1.07614	0.9667470,1.185529	0.192824	0.999587	0.9374664,1.061708	0.989605	1.0065	0.9434763,1.069528	0.840846	1.02522	0.9253021,1.125146	0.626626	197.597	7.14005e-14	0.0972116	0.520107	75
Phospholipids to total lipids ratio in very small VLDL	Atrial fibrillation	1.00762	0.9405029,1.074736	0.824574	1.28019	1.0700551,1.490329	0.0247666	1.00443	0.9247061,1.084162	0.913386	1.00905	0.8927101,1.125399	0.879825	0.995538	0.8607291,1.130346	0.94838	135.859	5.34176e-08	0.824574	0.840017	61
Phospholipids to total lipids ratio in large VLDL	Atrial fibrillation	1.01567	0.9634401,1.067900	0.559568	1.03233	0.9071294,1.157532	0.619937	1.05616	0.9987663,1.113556	0.0620482	1.05751	1.0038620,1.111151	0.0447746	1.05083	0.9662754,1.135388	0.254345	165.1	1.83661e-09	0.559568	0.319263	75
Phospholipids to total lipids ratio in very large HDL	Atrial fibrillation	1.0054	0.9474872,1.063307	0.855449	1.05835	0.9225289,1.194180	0.416156	0.991019	0.9212247,1.060814	0.800005	1.01807	0.9672950,1.068844	0.491882	1.00634	0.9166650,1.096019	0.890543	153.755	2.37425e-09	0.855449	0.978505	68
Phospholipids to total lipids ratio in very large VLDL	Atrial fibrillation	1.06273	0.9937223,1.131747	0.0839787	1.17757	0.9887358,1.366396	0.0962573	1.0043	0.9160970,1.092511	0.923972	1.132	0.9757175,1.288292	0.126525	1.01885	0.8804951,1.157203	0.792519	91.6367	0.000151078	0.0839787	0.493236	52
Phospholipids to total lipids ratio in chylomicrons and extremely large VLDL	Atrial fibrillation	1.05518	1.0037444,1.106620	0.0406865	1.09367	0.9611107,1.226229	0.193443	1.10176	1.0359770,1.167552	0.00388535	1.0892	1.0284371,1.149960	0.00893398	1.12593	1.0387411,1.213113	0.0113032	60.0269	0.0128569	0.0406865	0.08308	40
Phospholipids
Phosphatidylcholine levels	Atrial fibrillation	0.995834	0.9463591,1.045308	0.86863	1.01619	0.8825059,1.149883	0.814711	1.05843	0.9938797,1.122975	0.0846608	1.06459	0.9966055,1.132582	0.0768409	1.03119	0.9431252,1.119257	0.497272	84.3213	0.00399274	0.86863	0.352018	55
Phosphoglycerides levels	Atrial fibrillation	0.990209	0.9389109,1.041507	0.70696	1.00784	0.8661095,1.149580	0.914359	1.05884	0.9906982,1.126982	0.100068	1.05551	0.9829869,1.128032	0.15018	1.05771	0.9662135,1.149205	0.234856	86.1836	0.00267535	0.70696	0.0964652	55
Ratio of triglycerides to phosphoglycerides	Atrial fibrillation	0.955872	0.8987824,1.012962	0.121277	0.905939	0.7588966,1.052981	0.19164	0.978945	0.9134996,1.044390	0.523927	0.993982	0.9220561,1.065908	0.869755	0.959899	0.8693305,1.050467	0.378422	219.69	9.69792e-15	0.121277	0.906632	86
Sphingomyelin levels	Atrial fibrillation	1.03827	0.9791040,1.097441	0.213445	0.964854	0.7987888,1.130919	0.674236	1.08556	1.0204725,1.150654	0.0134303	1.09518	1.0165031,1.173861	0.0269091	0.991287	0.8815440,1.101029	0.876295	132.34	1.12957e-06	0.213445	0.329773	67
Total cholines	Atrial fibrillation	0.991722	0.9371598,1.046285	0.765249	0.984028	0.8321240,1.135933	0.836156	1.05358	0.9830396,1.124127	0.146988	1.04374	0.9734023,1.114079	0.237748	1.03595	0.9355807,1.136310	0.493214	103.757	0.00021081	0.765249	0.314409	60
Phospholipids (major classes)
Phospholipids in HDL	Atrial fibrillation	0.978301	0.9304710,1.026130	0.368654	0.990563	0.8280477,1.153079	0.909303	0.950163	0.8909294,1.009396	0.0907233	0.976895	0.9128015,1.040988	0.477181	0.983004	0.9028187,1.063190	0.676578	119.832	7.84405e-05	0.368654	0.883835	72
Phospholipids in LDL	Atrial fibrillation	1.02136	0.9749423,1.067781	0.372138	1.01676	0.8919160,1.141614	0.795179	0.995253	0.9283724,1.062134	0.889097	1.0301	0.9606843,1.099508	0.40649	1.02254	0.9452347,1.099852	0.574574	57.7896	0.182416	0.372138	0.97074	51
Phospholipids in VLDL	Atrial fibrillation	1.00585	0.9511879,1.060510	0.834352	0.947057	0.8205324,1.073581	0.402606	0.998507	0.9346910,1.062323	0.963397	0.993156	0.9240525,1.062259	0.846187	0.956614	0.8587413,1.054487	0.377834	143.002	3.7216e-08	0.834352	0.231015	68
Total phospholipids in lipoprotein particles	Atrial fibrillation	0.99871	0.9462171,1.051202	0.961549	0.993542	0.8477748,1.139308	0.930869	0.988064	0.9187839,1.057345	0.73408	1.0237	0.9284659,1.118940	0.631507	0.999312	0.8945794,1.104045	0.989774	94.2363	0.00242242	0.961549	0.989604	60
Phospholipids (subclasses)
Phospholipids in chylomicrons and extremely large VLDL	Atrial fibrillation	0.956101	0.8933850,1.018816	0.160621	0.890784	0.7593164,1.022252	0.0892793	0.979569	0.9125770,1.046562	0.545887	0.949324	0.8680947,1.030554	0.213899	0.920157	0.8251820,1.015131	0.0906247	207.507	2.77463e-16	0.160621	0.296462	73
Phospholipids in IDL	Atrial fibrillation	1.06133	1.0044161,1.118236	0.040378	1.05607	0.9468600,1.165269	0.33136	1.06701	1.0068929,1.127121	0.034459	1.06973	1.0112249,1.128238	0.0274631	1.01601	0.9213625,1.110652	0.743381	135.187	2.31443e-07	0.040378	0.263068	64
Phospholipids in large HDL	Atrial fibrillation	0.976847	0.9268951,1.026800	0.358032	0.997405	0.8804205,1.114390	0.965379	0.953313	0.9005470,1.006079	0.0757385	0.977613	0.9341067,1.021120	0.310496	0.981805	0.9036420,1.059968	0.646325	221.256	2.98131e-13	0.358032	0.868796	93
Phospholipids in large LDL	Atrial fibrillation	1.02953	0.9798240,1.079236	0.251149	0.989046	0.8595933,1.118499	0.868256	1.01924	0.9525876,1.085902	0.575139	1.03066	0.9516646,1.109647	0.457375	1.00219	0.9187306,1.085640	0.959331	60.8892	0.100266	0.251149	0.434198	49
Phospholipids in large VLDL	Atrial fibrillation	0.973123	0.9122202,1.034026	0.3806	0.916356	0.7856364,1.047075	0.19512	0.998615	0.9303309,1.066899	0.968266	1.00147	0.9336733,1.069257	0.966368	0.952134	0.8519514,1.052317	0.341039	176.499	6.28354e-13	0.3806	0.591778	70
Phospholipids in medium HDL	Atrial fibrillation	0.970898	0.9222672,1.0195298	0.233932	0.823141	0.6754772,0.9708051	0.0121965	0.951999	0.8851680,1.0188306	0.149118	0.950238	0.8539259,1.0465511	0.30303	0.992131	0.9031065,1.0811553	0.862502	95.0183	0.00346069	0.233932	0.570819	66
Phospholipids in medium LDL	Atrial fibrillation	1.01015	0.9614446,1.058860	0.684402	0.98814	0.8778881,1.098391	0.832939	0.995334	0.9288891,1.061779	0.890278	1.02542	0.9424044,1.108442	0.556214	1.01187	0.9248734,1.098874	0.791486	61.7787	0.0727164	0.684402	0.963089	49
Phospholipids in medium VLDL	Atrial fibrillation	1.01267	0.9580580,1.067281	0.651374	0.93615	0.8207305,1.051570	0.266532	0.99585	0.9313891,1.060310	0.899365	0.977822	0.9093683,1.046277	0.522972	0.939586	0.8427932,1.036379	0.211443	126.466	1.55354e-05	0.651374	0.0728445	69
Phospholipids in small HDL	Atrial fibrillation	0.96254	0.8836234,1.041456	0.343	0.945801	0.8204188,1.071183	0.387873	0.99086	0.9165363,1.065185	0.80868	1.00502	0.9350589,1.074978	0.889031	1.03346	0.8917283,1.175182	0.65105	161.278	1.24085e-13	0.343	0.243117	52
Phospholipids in small LDL	Atrial fibrillation	1.02015	0.9748524,1.065457	0.387963	0.988275	0.8745740,1.101976	0.839696	1.00198	0.9391896,1.064761	0.950875	1.02956	0.9719698,1.087160	0.32611	1.01479	0.9434513,1.086130	0.688386	67.8422	0.057359	0.387963	0.851063	53
Phospholipids in small VLDL	Atrial fibrillation	1.02295	0.9705480,1.075353	0.396041	0.93974	0.8236167,1.055864	0.297674	0.99951	0.9378824,1.061138	0.987563	0.98492	0.9137304,1.056111	0.676952	0.967165	0.8714570,1.062873	0.496381	140.392	2.56953e-06	0.396041	0.175349	74
Phospholipids in very large HDL	Atrial fibrillation	1.014	0.9638876,1.064109	0.586627	1.06501	0.9295282,1.200493	0.365003	0.995408	0.9391235,1.051693	0.872669	1.00179	0.9593531,1.044231	0.934315	0.976859	0.9025664,1.051151	0.538604	178.321	7.97101e-10	0.586627	0.188075	82
Phospholipids in very large VLDL	Atrial fibrillation	0.968225	0.9110450,1.025404	0.268344	0.917249	0.7785776,1.055920	0.226838	0.997082	0.9270051,1.067158	0.934851	0.997176	0.9237565,1.070595	0.940061	0.940591	0.8487093,1.032472	0.196364	148.417	3.02599e-09	0.268344	0.432263	69
Phospholipids in very small VLDL	Atrial fibrillation	1.02296	0.9794338,1.066495	0.30664	0.972208	0.8695038,1.074911	0.592259	1.00821	0.9582858,1.058142	0.748109	1.02558	0.9808018,1.070366	0.272456	1.0375	0.9679628,1.107031	0.302873	133.527	2.754e-05	0.30664	0.610492	77
Triglycerides % (subclasses)
Triglycerides to total lipids ratio in IDL	Atrial fibrillation	1.00008	0.9572053,1.042945	0.997266	0.947473	0.8340384,1.060907	0.354093	1.00144	0.9434445,1.059445	0.961088	1.02212	0.9710863,1.073148	0.403383	1.01837	0.9478605,1.088887	0.614259	134.098	6.07014e-05	0.997266	0.526525	81
Triglycerides to total lipids ratio in large HDL	Atrial fibrillation	1.00169	0.9484419,1.054937	0.950453	1.00499	0.8741836,1.135793	0.940775	1.00622	0.9441891,1.068259	0.844576	1.05167	0.9910600,1.112289	0.107704	1.05835	0.9748041,1.141899	0.187685	166.098	1.36738e-09	0.950453	0.101093	76
Triglycerides to total lipids ratio in large LDL	Atrial fibrillation	1.00911	0.9627824,1.055439	0.701201	0.981837	0.8642584,1.099416	0.760882	1.02254	0.9636658,1.081405	0.458109	1.03024	0.9726172,1.087860	0.314495	1.0201	0.9422593,1.097944	0.617925	111.59	0.000681622	0.701201	0.734429	72
Triglycerides to total lipids ratio in medium HDL	Atrial fibrillation	1.01225	0.9539123,1.070578	0.682583	1.04559	0.9150947,1.176092	0.505266	1.01412	0.9538299,1.074405	0.648565	1.04559	0.9919931,1.099194	0.107462	1.05632	0.9635768,1.149058	0.250834	206.652	3.54047e-15	0.682583	0.251292	76
Triglycerides to total lipids ratio in medium LDL	Atrial fibrillation	0.996364	0.9465464,1.046182	0.886052	0.944046	0.8345138,1.053578	0.306777	1.00138	0.9470076,1.055748	0.960413	1.02332	0.9800890,1.066542	0.299993	1.02007	0.9425300,1.097614	0.617217	140.441	7.81604e-08	0.886052	0.439891	66
Triglycerides to total lipids ratio in medium VLDL	Atrial fibrillation	0.919066	0.8621150,0.9760161	0.003677	0.993302	0.8504767,1.1361268	0.926752	0.985655	0.9224835,1.0488260	0.653929	0.993302	0.9179661,1.0686374	0.861648	0.953438	0.8568564,1.0500187	0.336255	187.817	4.79237e-11	0.003677	0.358868	81
Triglycerides to total lipids ratio in small HDL	Atrial fibrillation	0.999175	0.9458574,1.052494	0.97581	1.05731	0.9244129,1.190216	0.413474	1.02469	0.9710131,1.078376	0.373097	1.05731	1.0076672,1.106962	0.0305701	1.03384	0.9489549,1.118721	0.444452	233.302	3.2633e-16	0.97581	0.314552	89
Triglycerides to total lipids ratio in small LDL	Atrial fibrillation	0.97484	0.9236092,1.026072	0.329625	0.913571	0.7881232,1.039018	0.162481	1.00041	0.9424907,1.058332	0.988892	1.01568	0.9555257,1.075831	0.613896	0.970332	0.8894369,1.051227	0.468152	156.832	3.63879e-09	0.329625	0.88448	70
Triglycerides to total lipids ratio in small VLDL	Atrial fibrillation	0.937628	0.8782616,0.9969951	0.0334844	0.943434	0.8154342,1.0714347	0.375886	0.980989	0.9187924,1.0431862	0.545279	0.97541	0.9080695,1.0427498	0.471253	0.945346	0.8460773,1.0446142	0.271269	167.949	4.72765e-11	0.0334844	0.839946	69
Triglycerides to total lipids ratio in very small VLDL	Atrial fibrillation	0.967449	0.9177866,1.017111	0.19153	0.982346	0.8706844,1.094007	0.755448	0.999334	0.9396463,1.059021	0.982541	0.998394	0.9367427,1.060046	0.959394	0.975348	0.8908146,1.059882	0.564594	145.586	6.61253e-07	0.19153	0.815799	76
Triglycerides to total lipids ratio in large VLDL	Atrial fibrillation	0.930822	0.8816825,0.9799615	0.00424515	1.03253	0.9015291,1.1635237	0.634005	0.942835	0.8863591,0.9993110	0.0410649	0.953249	0.9020907,1.0044070	0.072322	0.915919	0.8363290,0.9955094	0.0352651	89.765	0.000891711	0.00424515	0.613967	54
Triglycerides to total lipids ratio in very large HDL	Atrial fibrillation	0.97015	0.9147967,1.025503	0.283246	0.950637	0.8166408,1.084634	0.461563	0.999113	0.9368050,1.061420	0.977721	1.01297	0.9542844,1.071651	0.668317	1.00633	0.9159020,1.096749	0.891692	167.983	1.97509e-10	0.283246	0.3192139	75
Triglycerides to total lipids ratio in very large VLDL	Atrial fibrillation	0.908644	0.8428963,0.9743907	0.0042904	1.00632	0.8417266,1.1709125	0.940459	0.916748	0.8463733,0.9871216	0.0154817	0.91908	0.8113520,1.0268083	0.130162	0.882862	0.7634171,1.0023075	0.0455472	148.881	6.26753e-10	0.0042904	0.572811	60
Triglycerides to total lipids ratio in chylomicrons and extremely large VLDL	Atrial fibrillation	0.874114	0.8101639,0.9380637	3.72896e-05	0.875105	0.7458445,1.0043666	0.0559976	0.856862	0.7823719,0.9313512	4.80925e-05	0.854449	0.7811609,0.9277365	0.000396289	0.795856	0.6986886,0.8930227	0.000170985	36.0183	0.0217619	3.72896e-05	0.0287031	23
Triglycerides (major classes)
Total triglycerides levels	Atrial fibrillation	0.975218	0.9135997,1.036837	0.42475	0.866991	0.7232077,1.010774	0.0558995	0.997444	0.9320126,1.062876	0.938895	0.990499	0.9269847,1.054014	0.76922	0.92247	0.8261728,1.018768	0.105237	197.203	9.37389e-15	0.42475	0.147873	75
Triglycerides in HDL	Atrial fibrillation	0.999515	0.9433679,1.0556618	0.986485	0.829535	0.7023383,0.9567326	0.00545597	1.00616	0.9488202,1.0634950	0.83379	1.02529	0.9799738,1.0706131	0.284196	1.01183	0.9265962,1.0970678	0.787704	173.845	1.51473e-12	0.986485	0.707956	68
Triglycerides in LDL	Atrial fibrillation	1.00143	0.9456231,1.057244	0.95987	0.978561	0.8732801,1.083843	0.687824	1.03708	0.9845572,1.089600	0.174253	1.03014	0.9888373,1.071446	0.16315	1.03844	0.9492971,1.127574	0.409756	207.167	2.97835e-15	0.95987	0.309856	75
Triglycerides in VLDL	Atrial fibrillation	0.957549	0.8989582,1.0161403	0.146753	0.854973	0.7182508,0.9916956	0.0278968	0.985183	0.9211672,1.0491984	0.647627	0.976916	0.9112186,1.0426139	0.488303	0.923718	0.8341392,1.0132972	0.0870662	181.813	4.22107e-12	0.146753	0.302028	78
Triglycerides (subclasses)
Triglycerides in chylomicrons and extremely large VLDL	Atrial fibrillation	0.91848	0.8584615,0.9784983	0.00548687	0.888232	0.7548927,1.0215720	0.0868691	0.899153	0.8275352,0.9707712	0.00362348	0.8783	0.7944872,0.9621127	0.00362414	0.915728	0.8250559,1.0063996	0.0621826	142.328	3.01084e-09	0.00548687	0.930867	63
Triglycerides in IDL	Atrial fibrillation	1.01659	0.9635850,1.069590	0.542947	0.959954	0.8556739,1.064235	0.445353	1.04009	0.9927250,1.087459	0.103827	1.02842	0.9890870,1.067763	0.167623	1.03083	0.9494039,1.112256	0.467687	181.016	7.94193e-14	0.542947	0.659119	66
Triglycerides in large HDL	Atrial fibrillation	1.00978	0.9606730,1.058887	0.697686	0.882677	0.7622825,1.003071	0.0475189	1.04514	1.0007815,1.089499	0.0510781	1.02103	0.9821867,1.059875	0.298691	1.01092	0.9412074,1.080625	0.761457	128.626	7.45769e-09	0.697686	0.964285	53
Triglycerides in large LDL	Atrial fibrillation	1.01376	0.9582089,1.069307	0.629713	0.99345	0.8918531,1.095048	0.899513	1.04277	0.9922093,1.093321	0.104485	1.03148	0.9907853,1.072178	0.14032	1.03446	0.9472330,1.121683	0.449304	192.813	1.35941e-14	0.629713	0.556495	68
Triglycerides in large VLDL	Atrial fibrillation	0.952067	0.8941002,1.010033	0.0967379	0.869027	0.7299534,1.008100	0.0519326	0.990716	0.9264854,1.054947	0.775943	0.986398	0.9124243,1.060371	0.717818	0.921906	0.8311994,1.012612	0.0834833	164.116	6.42345e-10	0.0967379	0.368591	76
Triglycerides in medium HDL	Atrial fibrillation	0.99938	0.9350826,1.063678	0.98492	0.993306	0.8823082,1.104305	0.90601	1.00778	0.9488386,1.066721	0.796633	1.03383	0.9821372,1.085521	0.212186	1.01697	0.9133525,1.120596	0.751366	197.746	3.8052e-17	0.98492	0.674001	63
Triglycerides in medium LDL	Atrial fibrillation	0.996479	0.9348114,1.058146	0.910735	0.948197	0.8157271,1.080666	0.434076	1.01431	0.9558188,1.072809	0.633918	1.02517	0.9742520,1.076091	0.342102	1.02007	0.9183821,1.121766	0.702916	209.857	6.82408e-17	0.910735	0.571332	70
Triglycerides in medium VLDL	Atrial fibrillation	0.961559	0.9032668,1.019852	0.187501	0.923976	0.7913768,1.056575	0.246837	0.996545	0.9340336,1.059057	0.913597	0.982811	0.9236567,1.041965	0.567653	0.962354	0.8698279,1.054880	0.419358	165.853	5.60491e-11	0.187501	0.982001	71
Triglycerides in small HDL	Atrial fibrillation	0.982539	0.9222955,1.042782	0.566565	1.00158	0.8758170,1.127340	0.980453	1.00015	0.9398888,1.060414	0.996068	1.02297	0.9658018,1.080135	0.438711	1.00391	0.9062587,1.101557	0.937812	229.114	9.20838e-18	0.566565	0.583761	81
Triglycerides in small LDL	Atrial fibrillation	0.977467	0.9185717,1.0363630	0.448184	0.848977	0.7225395,0.9754151	0.0135555	0.997478	0.9333883,1.0615686	0.938455	0.992194	0.9235574,1.0608305	0.823626	0.957505	0.8617825,1.0532267	0.377246	190.997	2.5129e-14	0.448184	0.592594	73
Triglycerides in small VLDL	Atrial fibrillation	0.97122	0.9129237,1.029517	0.326192	0.880546	0.7545947,1.006497	0.0514639	0.997997	0.9378774,1.058117	0.947892	0.991357	0.9358997,1.046815	0.759872	0.987958	0.8976928,1.078223	0.793242	225.641	3.03734e-17	0.326192	0.627162	82
Triglycerides in very large HDL	Atrial fibrillation	0.999302	0.9547520,1.043851	0.97548	0.949446	0.8129668,1.085926	0.459182	1.0389	0.9899168,1.087886	0.126753	1.03806	0.9957823,1.080340	0.0884623	1.0067	0.9385046,1.074894	0.848479	126.377	1.22081e-06	0.97548	0.779221	64
Triglycerides in very large VLDL	Atrial fibrillation	0.947523	0.8894542,1.005591	0.0688422	0.858695	0.7072573,1.010134	0.0523839	0.981748	0.9150185,1.048478	0.588476	0.963163	0.8887490,1.037577	0.326095	0.93138	0.8410539,1.021707	0.12727	189.654	4.16183e-12	0.0688422	0.626618	82
Triglycerides in very small VLDL	Atrial fibrillation	1.00713	0.9535067,1.060748	0.795169	1.04625	0.9432459,1.149253	0.392358	1.00518	0.9496913,1.060668	0.855198	1.02576	0.9812752,1.070236	0.266062	1.02757	0.9473718,1.107765	0.50834	217.032	9.76309e-16	0.795169	0.509761	82
Ketone bodies
3-Hydroxybutyrate levels	Atrial fibrillation	1.0071	0.8870924,1.127109	0.908003	0.966738	0.7050013,1.228476	0.803064	0.945111	0.7981702,1.092051	0.451443	0.90777	0.7004242,1.115116	0.373144	0.909752	0.5761357,1.243367	0.586116	24.6374	0.103126	0.908003	0.530085	19
Acetoacetate levels	Atrial fibrillation	1.04681	0.8989151,1.194705	0.544333	1.01225	0.7541867,1.270316	0.929324	1.01906	0.8299410,1.208189	0.844829	1.0299	0.8038958,1.255898	0.806883	0.99482	0.5730651,1.416575	0.981678	4.56526	0.600651	0.487028	0.810496	7
Acetone levels	Atrial fibrillation	1.00491	0.8802545,1.129558	0.938658	1.06692	0.8053198,1.328528	0.637889	1.06864	0.9018908,1.235387	0.435206	1.07556	0.8619629,1.289156	0.519007	0.940779	0.6665203,1.215037	0.672913	7.30616	0.69626	0.928261	0.609564	12
Amino acids
Alanine levels	Atrial fibrillation	0.953903	0.8569958,1.050810	0.339823	0.929091	0.7332545,1.124927	0.467202	0.971362	0.8607798,1.081944	0.60655	0.960499	0.8176701,1.103329	0.584196	1.03528	0.7855245,1.285026	0.787437	59.2676	0.0016448	0.339823	0.490502	35
Glutamine levels	Atrial fibrillation	0.997929	0.9479226,1.047935	0.935228	1.03425	0.9148221,1.153669	0.583588	1.00395	0.9428310,1.065064	0.899455	1.00456	0.9478310,1.061285	0.875938	0.994343	0.9185408,1.070144	0.884127	49.7039	0.139834	0.935228	0.901102	43
Glycine levels	Atrial fibrillation	0.980709	0.9525403,1.008878	0.175294	0.966999	0.8410398,1.092958	0.604053	0.98022	0.9531273,1.007312	0.148366	0.976916	0.9493096,1.004522	0.104096	0.977387	0.9440469,1.010727	0.185479	61.6114	0.061674	0.175294	0.704234	48
Histidine levels	Atrial fibrillation	1.01733	0.8699050,1.164753	0.819324	1.1015	0.9098075,1.293194	0.339706	1.10637	0.9695295,1.243216	0.147655	1.12129	0.9590503,1.283528	0.188321	1.00515	0.5675804,1.442711	0.982007	32.7461	0.00313395	0.819324	0.954943	15
Isoleucine levels	Atrial fibrillation	1.0594	0.9517215,1.167089	0.29355	1.14028	0.9316514,1.348902	0.248714	1.10181	0.9621811,1.241439	0.173524	1.1194	0.9593213,1.279477	0.200593	1.27558	0.9531872,1.597972	0.177202	5.43367	0.794985	0.176437	0.265307	10
Leucine levels	Atrial fibrillation	1.06244	0.9538649,1.171022	0.274218	1.06382	0.8691613,1.258475	0.541609	1.0596	0.9380312,1.181173	0.350626	1.05874	0.9350866,1.182397	0.378233	1.09673	0.8470118,1.346456	0.479086	25.0906	0.0927011	0.274218	0.784024	18
Total concentration of branched-chain amino acids (leucine + isoleucine + valine)	Atrial fibrillation	1.04084	0.9293551,1.152325	0.481604	1.04686	0.8873678,1.206354	0.581383	1.06649	0.9462964,1.186686	0.293839	1.05683	0.9461362,1.167528	0.342284	1.19198	0.9667970,1.417171	0.147183	28.2388	0.0296039	0.481604	0.197748	17
Phenylalanine levels	Atrial fibrillation	0.996347	0.8994425,1.093252	0.940996	1.00745	0.8327994,1.182098	0.935672	0.997224	0.8903393,1.104110	0.959352	0.990182	0.8824018,1.097962	0.862065	0.968018	0.7601131,1.175923	0.76819	8.94666	0.346815	0.940996	0.763452	9
Tyrosine levels	Atrial fibrillation	1.06912	0.9830023,1.155244	0.128219	0.874044	0.6306251,1.117463	0.286469	1.1634	1.0652929,1.261498	0.00249709	1.1245	1.0363512,1.212649	0.0136906	1.08407	0.9459755,1.222170	0.260678	68.7117	0.000172753	0.128219	0.800735	35
Valine levels	Atrial fibrillation	1.08697	0.9780361,1.195896	0.133495	1.07953	0.9340666,1.224987	0.315439	1.06343	0.9653528,1.161508	0.219062	1.0659	0.9785589,1.153232	0.168352	1.05618	0.8446581,1.267705	0.618662	44.4825	0.000809444	0.133495	0.757583	20
Apolipoproteins	Atrial fibrillation
Apolipoprotein A1 levels	Atrial fibrillation	0.984274	0.9324614,1.036086	0.548749	1.01053	0.8425992,1.178461	0.903067	0.945664	0.8827462,1.008583	0.0817953	0.967593	0.8972025,1.037983	0.36232	0.980405	0.8916716,1.069138	0.663466	128.727	6.17117e-06	0.548749	0.914656	70
Apolipoprotein B levels	Atrial fibrillation	1.03172	0.9801662,1.083269	0.235155	0.976129	0.8442511,1.108007	0.720936	0.99502	0.9304183,1.059622	0.879611	0.993625	0.9134749,1.073774	0.8763	0.951561	0.8614499,1.041672	0.285049	85.4148	0.00413228	0.235155	0.039241	58
Ratio of apolipoprotein B to apolipoprotein A1 levels	Atrial fibrillation	1.03447	0.9823985,1.086549	0.202077	1.11885	0.9914178,1.246285	0.0886578	1.00373	0.9363658,1.071094	0.913743	1.02091	0.9407264,1.101100	0.614558	1.01308	0.9207570,1.105410	0.783438	114.359	0.00037223	0.202077	0.592018	70
Miscellaneous
Acetate levels	Atrial fibrillation	0.954491	0.7819896,1.126991	0.596649	1.07324	0.7200068,1.426482	0.706568	0.876252	0.6793297,1.073175	0.18857	0.936313	0.7222724,1.150353	0.565781	1.00434	0.5036956,1.504992	0.987012	9.68135	0.207362	0.596649	0.83718	10
Acetone levels	Atrial fibrillation	1.00491	0.8802545,1.129558	0.938658	1.06692	0.7928688,1.340979	0.653073	1.06864	0.8999272,1.237350	0.440569	1.07556	0.8644098,1.286710	0.51428	0.940779	0.6665203,1.215037	0.672913	7.30616	0.69626	0.928261	0.609564	12
Albumin levels	Atrial fibrillation	1.00305	0.9060098,1.100092	0.950942	0.904147	0.7281844,1.080110	0.270607	1.00935	0.9106460,1.108058	0.853356	0.983107	0.8784158,1.087799	0.751966	0.979093	0.8180280,1.140157	0.798903	64.8721	0.000227769	0.950942	0.712785	32
Creatinine levels	Atrial fibrillation	0.930475	0.8274918,1.033459	0.170233	0.786442	0.5245654,1.048318	0.0765458	0.921528	0.8213636,1.021692	0.109791	0.988925	0.7750204,1.202829	0.919013	0.905306	0.5682659,1.242347	0.564825	198.126	2.05912e-14	0.170233	0.867395	73
Fatty acids
Degree of unsaturation	Atrial fibrillation	1.05175	0.9920719,1.111423	0.0975005	0.983545	0.8292159,1.137874	0.834125	1.03731	0.9992509,1.075377	0.0592347	1.03395	0.9942987,1.073608	0.106332	1.03767	0.9583293,1.117007	0.366341	133.621	1.76249e-11	0.0975005	0.611929	44
Ratio of docosahexaenoic acid to total fatty acid levels	Atrial fibrillation	1.04666	0.9568293,1.136498	0.319706	0.959342	0.8040788,1.114605	0.604568	1.04129	0.9923237,1.090263	0.10533	1.04035	0.9925902,1.088107	0.11613	1.07088	0.9424722,1.199293	0.305507	132.335	7.54989e-16	0.319706	0.624391	28
Docosahexaenoic acid levels	Atrial fibrillation	1.03476	0.9680483,1.101473	0.315421	0.971173	0.8344171,1.107929	0.677092	1.04517	0.9990000,1.091336	0.0607239	1.04449	1.0002967,1.088678	0.0600014	1.07158	0.9755882,1.167570	0.165262	152.086	8.06061e-14	0.315422	0.326255	45
Linoleic acid levels	Atrial fibrillation	0.974321	0.9178570,1.0307843	0.366503	0.931585	0.7867224,1.0764484	0.342653	0.983029	0.9091045,1.0569533	0.649954	0.940076	0.8341015,1.0460515	0.259003	0.881906	0.7653396,0.9984732	0.0401754	77.7648	0.00236145	0.366503	0.0638844	51
Ratio of linoleic acid to total fatty acids	Atrial fibrillation	0.961576	0.9016265,1.021526	0.20019	1.09177	0.9042085,1.279333	0.364819	0.938934	0.8688589,1.009009	0.0780025	0.956907	0.8912769,1.022538	0.196441	0.926095	0.8340645,1.018125	0.110727	49.5387	0.0815079	0.20019	0.298826	40
Ratio of monounsaturated fatty acids to total fatty acids	Atrial fibrillation	0.936667	0.8791445,0.9941904	0.0257928	0.945981	0.8227725,1.0691897	0.380426	0.948022	0.8921775,1.0038669	0.0610127	0.971203	0.9215072,1.0208980	0.25356	0.95874	0.8713394,1.0461397	0.348428	164.135	3.57393e-11	0.0257928	0.489076	68
Monounsaturated fatty acids	Atrial fibrillation	0.956079	0.8946995,1.017459	0.15151	1.05714	0.9048209,1.209467	0.47735	0.994012	0.9297875,1.058237	0.854581	0.98007	0.9117271,1.048414	0.565882	0.96245	0.8615937,1.063307	0.45996	155.967	1.78139e-10	0.15151	0.870724	68
Omega-3 fatty acids	Atrial fibrillation	1.00981	0.9511659,1.068457	0.744192	0.934212	0.8284224,1.040002	0.21347	1.03872	1.0015632,1.075886	0.0450815	1.03116	0.9937899,1.068527	0.114101	1.04131	0.9591825,1.123438	0.338958	186.086	3.80631e-18	0.744192	0.300887	51
Ratio of omega-3 fatty acids to total fatty acids	Atrial fibrillation	1.02389	0.9664959,1.081277	0.42014	0.896267	0.7623530,1.030182	0.118206	1.03047	0.9959675,1.064981	0.0881752	1.02685	0.9932847,1.060419	0.131071	1.04231	0.9677759,1.116850	0.283717	125.94	1.74706e-12	0.42014	0.463151	35
Omega-6 fatty acids	Atrial fibrillation	0.985986	0.9305576,1.041414	0.617743	0.948039	0.8035955,1.092482	0.472045	0.99055	0.9214241,1.059676	0.78776	0.976128	0.8805567,1.071700	0.622181	0.918025	0.8095457,1.026505	0.127996	99.5817	0.000303814	0.617743	0.140524	58
Ratio of omega-6 fatty acids to total fatty acids	Atrial fibrillation	1.02924	0.9521425,1.106337	0.463751	1.1892	0.9741145,1.404287	0.120508	1.01263	0.9353307,1.089934	0.750265	0.994529	0.8993173,1.089741	0.910532	1.07387	0.9427237,1.205022	0.291929	139.224	4.05233e-10	0.463751	0.435685	56
Ratio of polyunsaturated fatty acids to monounsaturated fatty acids	Atrial fibrillation	1.06816	0.9967170,1.139600	0.0704572	1.08473	0.9180933,1.251374	0.34309	1.07424	1.0122242,1.136258	0.0236157	1.03325	0.9768655,1.089631	0.260657	1.04761	0.9342138,1.161014	0.425077	179.014	1.40258e-15	0.0704572	0.00157426	58
Ratio of polyunsaturated fatty acids to total fatty acids	Atrial fibrillation	1.08795	1.0032142,1.172690	0.0511993	1.10305	0.9064063,1.299702	0.3335	1.07496	0.9901708,1.159756	0.094737	1.05137	0.9660055,1.136735	0.256145	1.07067	0.9216704,1.219668	0.373948	140.077	1.08585e-11	0.0511993	0.798069	50
Polyunsaturated fatty acids	Atrial fibrillation	1.01049	0.9611969,1.059779	0.67824	1.00026	0.8768760,1.123649	0.99669	1.00887	0.9460225,1.071719	0.782993	1.02167	0.9435608,1.099778	0.59271	0.953755	0.8589231,1.048586	0.33198	98.1995	0.000572494	0.67824	0.168905	59
Saturated fatty acids	Atrial fibrillation	0.971718	0.9097778,1.033659	0.36397	0.927515	0.7542211,1.100810	0.398721	0.990372	0.9177584,1.062985	0.793978	0.997607	0.9099960,1.085218	0.957465	0.92756	0.8174183,1.037702	0.186899	104.391	1.53951e-05	0.36397	0.321703	54
Ratio of saturated fatty acids to total fatty acids	Atrial fibrillation	1.01285	0.8932624,1.132442	0.834218	1.03617	0.8401232,1.232210	0.7252	1.03807	0.9169747,1.159161	0.545364	1.0939	0.9300295,1.257769	0.292566	0.839927	0.4866641,1.193189	0.342038	62.7306	0.000114422	0.834218	0.280001	28
Total fatty acids	Atrial fibrillation	0.973327	0.9079722,1.038683	0.417496	0.904493	0.7611982,1.047787	0.174853	0.994843	0.9276449,1.062041	0.880131	0.983537	0.9149541,1.052121	0.636946	0.920677	0.8077655,1.033588	0.156668	170.218	1.72806e-12	0.417496	0.242001	65
Glycolysis related
Citrate levels	Atrial fibrillation	0.945771	0.8495627,1.041979	0.25601	0.910973	0.7755969,1.046349	0.186213	0.949555	0.8604222,1.038687	0.25502	0.98057	0.8987322,1.062408	0.641502	1.05658	0.8764393,1.236714	0.553519	98.1475	2.18727e-08	0.25601	0.166009	37
Glucose levels	Atrial fibrillation	0.893746	0.7372228,1.050270	0.159533	0.942498	0.6977219,1.187274	0.63964	0.941287	0.7979308,1.084644	0.408089	1.05889	0.9274112,1.190364	0.402093	1.13399	0.7776630,1.490316	0.496078	99.0679	4.3302e-11	0.159533	0.160525	25
Lactate levels	Atrial fibrillation	1.12425	0.8927334,1.355774	0.321438	0.940917	0.7015988,1.180234	0.628726	0.975219	0.7934557,1.156982	0.786706	0.963053	0.7821804,1.143925	0.691903	1.38217	0.5490764,2.215262	0.465869	31.3685	0.000509884	0.321438	0.623978	11
Pyruvate levels	Atrial fibrillation	1.0292	0.9010138,1.157387	0.659873	0.889513	0.6047554,1.174270	0.429792	0.973324	0.8373063,1.109342	0.69682	0.929624	0.6661365,1.193111	0.593239	1.00577	0.7431343,1.268401	0.966215	63.0892	2.34397e-06	0.659873	0.844759	5
Inflammation markers
Glycoprotein acetyls levels	Atrial fibrillation	0.969771	0.8959412,1.043600	0.415134	1.02758	0.9006210,1.154534	0.676046	0.99812	0.9310730,1.065167	0.956135	0.989242	0.9241757,1.054308	0.745723	0.999412	0.8697440,1.129080	0.992935	161.088	1.22008e-11	0.415134	0.580938	60
Partical size
Average diameter for HDL particles	Atrial fibrillation	0.98087	0.9325692,1.029171	0.43316	0.995338	0.8638338,1.126843	0.944632	0.985975	0.9206825,1.051267	0.67156	1.00221	0.9465356,1.057886	0.938204	1.00296	0.9249365,1.080984	0.940978	175.372	1.8889e-07	0.43316	0.477347	94
Average diameter for LDL particles	Atrial fibrillation	1.06266	0.9801550,1.145167	0.148798	1.28925	0.9959624,1.582546	0.0984119	1.03388	0.9287038,1.139059	0.534651	1.03029	0.9079242,1.152653	0.635657	1.05968	0.9092304,1.210132	0.45534	70.1424	0.000386019	0.148798	0.965142	37
Average diameter for VLDL particles	Atrial fibrillation	0.929839	0.8785021,0.9811767	0.0054819	0.896047	0.7589543,1.0331394	0.121228	0.9486	0.8887840,1.0084169	0.0838035	0.955393	0.8870284,1.0237576	0.195186	0.943519	0.8622837,1.0247538	0.165308	154.181	1.22533e-08	0.0054819	0.649538	75
Particle concentrations (major classes)
Concentration of HDL particles	Atrial fibrillation	0.950407	0.8844954,1.0163192	0.130395	0.837556	0.6850638,0.9900487	0.0262158	0.938456	0.8602596,1.0166531	0.111362	0.941477	0.8662989,1.0166548	0.121065	0.987744	0.8673095,1.1081779	0.841615	154.592	4.48339e-10	0.130395	0.45593	63
Concentration of LDL particles	Atrial fibrillation	1.02864	0.9795578,1.077726	0.259472	0.949489	0.8273641,1.071613	0.409223	0.990941	0.9288351,1.053046	0.773954	0.990808	0.9121237,1.069492	0.818947	0.953594	0.8692347,1.037953	0.274664	74.8967	0.0254787	0.259472	0.0378928	57
Concentration of VLDL particles	Atrial fibrillation	1.02072	0.9689649,1.072471	0.437387	0.917214	0.8006245,1.033804	0.151111	0.999477	0.9389112,1.060043	0.986492	0.987702	0.9156273,1.059777	0.737579	0.946686	0.8530028,1.040370	0.255964	123.21	1.77833e-05	0.437387	0.0654237	67
Total concentration of lipoprotein particles	Atrial fibrillation	0.962112	0.8999874,1.024236	0.222998	0.972236	0.7956725,1.148800	0.75572	0.939158	0.8566517,1.021664	0.135912	0.952917	0.8607179,1.045116	0.30944	0.998625	0.8811445,1.116106	0.981766	119.046	6.11194e-06	0.222998	0.466318	61
Particle concentrations (subclasses)
Concentration of chylomicrons and extremely large VLDL particles	Atrial fibrillation	0.940386	0.8770561,1.003715	0.0571316	0.874563	0.7328495,1.016277	0.0686143	0.95625	0.8876832,1.024817	0.200973	0.931229	0.8408386,1.021619	0.127527	0.921005	0.8242703,1.017739	0.100659	179.642	1.2652e-13	0.0571316	0.577162	67
Concentration of IDL particles	Atrial fibrillation	1.06477	1.0020843,1.127460	0.0497295	1.0321	0.9175713,1.146630	0.591199	1.04686	0.9806720,1.113055	0.175053	1.04938	0.9720746,1.126681	0.227663	0.984049	0.8789059,1.089192	0.765695	105.566	3.31089e-06	0.0497295	0.076967	50
Concentration of large HDL particles	Atrial fibrillation	0.979418	0.9363265,1.022508	0.344165	1.02298	0.9027621,1.143189	0.711955	0.950704	0.8956719,1.005736	0.0717859	0.973213	0.9286574,1.017770	0.235362	0.979793	0.9133148,1.046271	0.548736	174.077	7.23471e-07	0.344165	0.988149	97
Concentration of large LDL particles	Atrial fibrillation	1.03126	0.9823783,1.080142	0.217116	0.953615	0.8349927,1.072238	0.436025	1.00448	0.9391868,1.069782	0.893158	1.02053	0.9525611,1.088490	0.560362	0.978951	0.8958350,1.062068	0.617988	77.6197	0.0192846	0.217116	0.137347	56
Concentration of large VLDL particles	Atrial fibrillation	0.962805	0.9007079,1.024903	0.231553	0.877899	0.7363750,1.019423	0.0760922	0.997457	0.9340995,1.060815	0.937225	0.987401	0.9244235,1.050378	0.69446	0.946501	0.8469324,1.046069	0.283291	177.9	6.75281e-13	0.231553	0.667306	71
Concentration of medium HDL particles	Atrial fibrillation	0.982747	0.9293844,1.036110	0.522688	0.946895	0.7843896,1.109401	0.512706	0.946322	0.8797237,1.012919	0.104428	0.961649	0.8903692,1.032928	0.286094	0.965808	0.8722766,1.059340	0.468561	136.173	1.25575e-06	0.522688	0.657823	70
Concentration of medium LDL particles	Atrial fibrillation	1.01786	0.9583965,1.077331	0.559503	0.967731	0.8291313,1.106330	0.644758	0.991463	0.9207878,1.062138	0.812059	0.993654	0.9056976,1.081611	0.887768	0.965022	0.8541452,1.075898	0.532011	88.7602	0.000606797	0.559503	0.270084	51
Concentration of medium VLDL particles	Atrial fibrillation	1.00552	0.9506845,1.060348	0.844104	0.938293	0.8200886,1.056498	0.294951	0.994953	0.9308580,1.059047	0.877027	0.979527	0.9020534,1.057001	0.602596	0.908794	0.8110399,1.006549	0.0597791	115.94	5.53626e-05	0.844104	0.0189085	65
Concentration of small HDL particles	Atrial fibrillation	0.994175	0.9204405,1.067909	0.87659	0.986699	0.8447653,1.128632	0.854187	1.06104	0.9894229,1.132663	0.104902	1.04016	0.9734636,1.106864	0.253755	1.04445	0.9108347,1.178070	0.527031	106.324	1.72083e-07	0.87659	0.389968	44
Concentration of small LDL particles	Atrial fibrillation	1.02759	0.9704005,1.084780	0.350942	0.987672	0.8651717,1.110173	0.843397	0.99314	0.9277895,1.058491	0.836443	0.997749	0.9159347,1.079564	0.95714	0.940978	0.8392094,1.042746	0.246381	108.474	3.30798e-05	0.350942	0.047648	57
Concentration of small VLDL particles	Atrial fibrillation	1.01641	0.9600032,1.072815	0.57169	1.01221	0.9013535,1.123057	0.83084	1.00088	0.9369524,1.064817	0.978372	0.992212	0.9300123,1.054413	0.806195	0.990554	0.8909031,1.090206	0.852522	166.572	4.46268e-11	0.57169	0.539995	68
Concentration of very large HDL particles	Atrial fibrillation	1.00509	0.9534485,1.056738	0.847106	0.93746	0.7931930,1.081726	0.382684	0.98716	0.9318832,1.042436	0.646774	1.00228	0.9580366,1.046529	0.91978	0.999047	0.9215541,1.076541	0.980826	224.012	4.89253e-14	0.847106	0.837591	90
Concentration of very large VLDL particles	Atrial fibrillation	0.962967	0.8989204,1.027014	0.24817	0.888414	0.7471769,1.029651	0.105585	0.981926	0.9154870,1.048366	0.590535	0.980519	0.9072242,1.053813	0.600668	0.931433	0.8296798,1.033187	0.176186	189.637	1.30033e-14	0.24817	0.411573	71
Concentration of very small VLDL particles	Atrial fibrillation	1.05011	1.0069050,1.093312	0.0265454	0.956292	0.8421884,1.070396	0.445451	1.05343	0.9996368,1.107232	0.0578892	1.03612	0.9837729,1.088460	0.188649	1.04103	0.9689467,1.113123	0.278311	100.287	0.00325628	0.0265454	0.768245	66
Total lipids (major classes)
Total lipids in HDL	Atrial fibrillation	0.981467	0.9345980,1.028336	0.434034	0.932003	0.7857355,1.078270	0.348202	0.945459	0.8874440,1.003474	0.0581224	0.964037	0.8999157,1.028157	0.266252	0.970596	0.8914203,1.049771	0.462205	150.277	3.33486e-06	0.434034	0.732405	82
Total lipids in LDL	Atrial fibrillation	1.03083	0.9822591,1.079406	0.220448	0.975051	0.8417884,1.108313	0.711821	0.995241	0.9266853,1.063797	0.891519	1.02431	0.9488251,1.099788	0.535833	0.984321	0.9013633,1.067279	0.710553	59.9122	0.11615	0.220448	0.186714	50
Total lipids in lipoprotein particles	Atrial fibrillation	0.99717	0.9459925,1.048348	0.913578	0.948215	0.7996577,1.096772	0.48558	0.991471	0.9238250,1.059117	0.803989	0.988328	0.8880038,1.088652	0.819332	0.917784	0.8166663,1.018903	0.101454	91.5415	0.0087058	0.913578	0.0688016	64
Total lipids in VLDL	Atrial fibrillation	0.97817	0.9185449,1.037795	0.468119	0.92209	0.7922929,1.051887	0.22527	0.995607	0.9294743,1.061739	0.896175	0.979836	0.9089811,1.050692	0.57515	0.926766	0.8296496,1.023882	0.129973	160.84	1.0216e-10	0.468119	0.174355	70
Total lipids (subclasses)
Total lipids in chylomicrons and extremely large VLDL	Atrial fibrillation	0.936835	0.8733287,1.0003414	0.0440354	0.877716	0.7433624,1.0120696	0.0616396	0.928727	0.8612595,0.9961953	0.0317121	0.888865	0.7969877,0.9807425	0.014534	0.909774	0.8135190,1.0060291	0.058761	186.148	4.26017e-14	0.0440354	0.429047	69
Total lipids in IDL	Atrial fibrillation	1.04969	0.9901298,1.109242	0.110523	0.995917	0.8790950,1.112738	0.945492	1.04535	0.9802721,1.110437	0.18161	1.06291	0.9988223,1.127003	0.0668674	1.0154	0.9135063,1.117296	0.769779	133.568	2.42899e-07	0.110523	0.433506	63
Total lipids in large HDL	Atrial fibrillation	0.987694	0.9393570,1.036032	0.615615	1.0224	0.8956309,1.149178	0.732639	0.950173	0.8960957,1.004250	0.0639531	0.979062	0.9326999,1.025424	0.373142	0.956136	0.8821095,1.030163	0.2378	246.349	3.74678e-14	0.615615	0.259508	105
Total lipids in large LDL	Atrial fibrillation	1.02973	0.9808358,1.078618	0.240253	1.13035	1.0035735,1.257126	0.0642179	1.02535	0.9561570,1.094547	0.478224	1.0358	0.9547606,1.116836	0.399167	1.00678	0.9213369,1.092226	0.877458	60.7385	0.102596	0.240253	0.530283	51
Total lipids in large VLDL	Atrial fibrillation	0.967635	0.9051990,1.030071	0.301691	0.90392	0.7698780,1.037962	0.144719	0.997594	0.9347187,1.060469	0.940133	0.996872	0.9270862,1.066658	0.930176	0.945794	0.8461251,1.045464	0.277416	175.048	1.01737e-12	0.301691	0.565399	71
Total lipids in medium HDL	Atrial fibrillation	0.967288	0.9152403,1.0193354	0.210399	0.83847	0.6811255,0.9958143	0.0317721	0.946893	0.8778176,1.0159687	0.12153	0.955992	0.8789190,1.0330642	0.256601	0.973433	0.8797834,1.0670836	0.575044	120.354	3.62296e-05	0.210399	0.873394	70
Total lipids in medium LDL	Atrial fibrillation	1.00754	0.9603595,1.054718	0.755033	0.967047	0.8475619,1.086533	0.585107	0.990879	0.9244672,1.057290	0.786824	0.997133	0.9086517,1.085614	0.949553	1.00139	0.9142941,1.088483	0.975223	56.2412	0.193664	0.755033	0.869937	50
Total lipids in medium VLDL	Atrial fibrillation	0.983729	0.9257138,1.041744	0.579428	0.904551	0.7867525,1.022349	0.100481	0.985656	0.9191615,1.052150	0.670203	0.970997	0.8971200,1.044875	0.438077	0.929845	0.8271435,1.032547	0.170494	122.694	1.536e-06	0.579428	0.199075	63
Total lipids in small HDL	Atrial fibrillation	0.976447	0.8985403,1.054354	0.548749	1.02207	0.8885430,1.155606	0.750113	1.04427	0.9725830,1.115952	0.236279	1.03398	0.9636175,1.104348	0.357011	1.04494	0.9056512,1.184231	0.539453	132.212	9.3133e-11	0.548749	0.256939	45
Total lipids in small LDL	Atrial fibrillation	1.00638	0.9551440,1.057612	0.80784	0.959861	0.8518104,1.067911	0.460876	0.987705	0.9230078,1.052402	0.707811	0.997683	0.9263259,1.069040	0.949449	0.964613	0.8779489,1.051277	0.419115	75.6053	0.0111665	0.80784	0.241351	52
Total lipids in small VLDL	Atrial fibrillation	1.01389	0.9616130,1.066171	0.604983	0.991069	0.8791016,1.103037	0.87567	1.00039	0.9402763,1.060497	0.989949	1.00083	0.9389522,1.062709	0.979092	1.00582	0.9131402,1.098508	0.902616	154.226	2.80316e-08	0.604983	0.837965	73
Total lipids in very large HDL	Atrial fibrillation	1.00908	0.9560057,1.062153	0.738545	1.0649	0.9316397,1.198163	0.35775	0.98737	0.9307115,1.044028	0.660154	0.996064	0.9554126,1.036715	0.849661	0.98666	0.9077209,1.065600	0.739664	212.411	1.62652e-13	0.738545	0.452295	85
Total lipids in very large VLDL	Atrial fibrillation	0.958117	0.8986943,1.017540	0.158181	0.886372	0.7326492,1.040095	0.128781	0.981843	0.9158995,1.047786	0.585998	0.986018	0.9111905,1.060845	0.713417	0.937815	0.8439254,1.031705	0.184758	176.102	9.58972e-12	0.158181	0.564283	75
Total lipids in very small VLDL	Atrial fibrillation	1.0283	0.9829969,1.073606	0.227279	0.987246	0.8816310,1.092862	0.812411	1.0091	0.9574098,1.060784	0.731293	1.02439	0.9763569,1.072429	0.328775	1.02738	0.9531676,1.101588	0.477993	132.256	1.41515e-05	0.227279	0.976066	75

## Sheet: TableS3
Table S3. The main significant results of MR estimation and pleiotropy assessment for lipids and its related traits on AF.
Note: Exposure marked with yellow underline indicate the presence of pleiotropy and results were discarded.
Exposure	Outcome	IVW method			Simple mode			Weighted median method			Weighted mode method			MR-Egger method			Cochran’s Q		random effects model	Heterogenity P-value	Number of IVs
		Estimate (OR)	95%CI	P value	Estimate (OR)	95%CI	P value	Estimate (OR)	95%CI	P value	Estimate (OR)	95%CI	P value	Estimate (OR)	95%CI	P value	Q	P value	P value	P value
Cholesterol % (subclasses)
Cholesterol to total lipids ratio in medium VLDL	Atrial fibrillation	1.08503	1.0268505 1.143201	0.00597158	1.01267	0.8918054 1.133545	0.838723	1.01516	0.9518132 1.078496	0.641629	1.00691	0.9345133 1.079303	0.852647	1.02989	0.9334276 1.126344	0.551443	184.824	1.86805e-11	0.00597158	0.189368	79
Cholesterol to total lipids ratio in small VLDL	Atrial fibrillation	1.06572	1.0173189 1.114129	0.00995279	1.00863	0.8903889 1.126860	0.887252	1.03127	0.9706764 1.091854	0.31929	1.02919	0.9575494 1.100836	0.434108	1.05261	0.9724980 1.132714	0.214406	107.096	0.000445537	0.00995279	0.7038972	67
Cholesterol to total lipids ratio in large VLDL	Atrial fibrillation	1.10594	1.0470563 1.164827	0.000803149	0.962824	0.8195578 1.106091	0.606299	1.08007	1.0139424 1.146197	0.0224291	1.06569	0.9957120 1.135672	0.0801728	1.11609	1.0170902 1.215091	0.0339912	134.969	1.81454e-08	0.000803149	0.822003	57
Cholesterol to total lipids ratio in very large VLDL	Atrial fibrillation	1.10959	1.0519264 1.167253	0.000408276	1.04614	0.8854557 1.206823	0.583932	1.08133	1.0121431 1.150524	0.0267547	1.04614	0.9217814 1.170497	0.479495	1.10146	1.0010061 1.201903	0.0635697	150.995	6.97264e-08	0.000408276	0.860834	74
Cholesterol to total lipids ratio in chylomicrons and extremely large VLDL	Atrial fibrillation	1.17093	1.1090461 1.232818	5.80157e-07	0.959516	0.8056374 1.113395	0.602768	1.22892	1.1547438 1.303104	5.13291e-08	1.19788	1.1267371 1.269015	2.97388e-05	1.22838	1.1341547 1.322596	0.000210876	42.0995	0.042432	5.80157e-07	0.201583	29
Cholesterol (subclasses)
Cholesterol levels in very small VLDL	Atrial fibrillation	1.06164	1.0146916 1.108599	0.0125221	1.06396	0.9561771 1.171734	0.263996	1.07847	1.0182779 1.138669	0.0138999	1.06885	1.0115195 1.126176	0.0263473	1.04214	0.9638571 1.120419	0.30555	101.457	0.000882311	0.0125221	0.562675	63
Cholesterol esters % (subclasses)
Cholesteryl esters to total lipids ratio in medium VLDL	Atrial fibrillation	1.0811	1.0231592 1.139039	0.00834316	1.00509	0.8787301 1.131450	0.937444	1.00511	0.9409001 1.069329	0.876261	0.999474	0.9224779 1.076470	0.989346	1.03553	0.9396561 1.131395	0.477688	183.922	2.46666e-11	0.00834316	0.273107	79
Cholesteryl esters to total lipids ratio in small VLDL	Atrial fibrillation	1.10076	1.0453391 1.156178	0.000685837	1.02211	0.8839769 1.160235	0.757358	1.05964	0.9968981 1.122382	0.0703489	1.04563	0.9862469 1.105014	0.145653	1.06299	0.9734345 1.152536	0.185993	145.231	4.56699e-08	0.000685837	0.334113	70
Cholesteryl esters to total lipids ratio in large VLDL	Atrial fibrillation	1.0818	1.0312202 1.132390	0.00231373	1.02727	0.8883004 1.166249	0.705627	1.10017	1.0330423 1.167307	0.00531464	1.09941	1.0285234 1.170298	0.0110675	1.1494	1.0655812 1.233219	0.00186054	111.097	9.3926e-05	0.00231373	0.083378	65
Cholesteryl esters to total lipids ratio in very large VLDL	Atrial fibrillation	1.09589	1.038141 1.153631	0.00188453	1.18941	1.034707 1.344121	0.031289	1.0808	1.008871 1.152723	0.0342331	1.18941	1.065935 1.312893	0.00750835	1.1006	1.003972 1.197220	0.0559327	154.303	2.74222e-08	0.00188453	0.913566	74
Cholesteryl esters to total lipids ratio in chylomicrons and extremely large VLDL	Atrial fibrillation	1.18338	1.120648 1.246103	1.433e-07	1.20256	1.077635 1.327482	0.00818565	1.23701	1.161200 1.312824	3.81934e-08	1.20687	1.134834 1.278904	3.49939e-05	1.30078	1.198362 1.403201	4.87168e-05	31.2448	0.116897	1.433e-07	0.0387871	24
Cholesterol esters(subclasses)
Cholesteryl esters in very small VLDL	Atrial fibrillation	1.07059	1.0089986 1.132173	0.0299584	1.05156	0.9403886 1.162732	0.379499	1.07199	1.0124085 1.131569	0.022205	1.07169	1.0140070 1.129371	0.0224622	1.02289	0.9173047 1.128471	0.676185	129.661	1.42405e-08	0.0299584	0.302696	54
Free cholesterol % (subclasses)
Free cholesterol to total lipids ratio in medium VLDL	Atrial fibrillation	1.07634	1.0253714 1.127316	0.0046704	1.10301	0.9753283 1.230689	0.13695	1.02424	0.9619490 1.086520	0.451139	1.02683	0.9508310 1.102830	0.497034	1.07755	0.9861882 1.168915	0.113785	126.102	2.37892e-05	0.0046704	0.976874	72
Free cholesterol to total lipids ratio in large VLDL	Atrial fibrillation	1.08399	1.0116313 1.156345	0.0289209	1.00004	0.8330792 1.166992	0.999669	1.13146	1.0500302 1.212899	0.00295131	1.10908	1.0150274 1.203130	0.036341	1.20803	1.0762777 1.339777	0.00733656	102.457	2.2701e-06	0.0289209	0.0631895	47
Free cholesterol to total lipids ratio in very large VLDL	Atrial fibrillation	1.10671	1.0401956 1.173217	0.00280988	1.17613	1.0003392 1.351918	0.0754937	1.04935	0.9791070 1.119597	0.178904	1.04169	0.9425827 1.140793	0.422433	1.12096	0.9932138 1.248702	0.0849805	147.999	2.15627e-09	0.00280988	0.818393	63
Free cholesterol to total lipids ratio in chylomicrons and extremely large VLDL	Atrial fibrillation	1.13998	1.0783110 1.201653	3.13018e-05	1.02138	0.8572201 1.185545	0.80256	1.18318	1.1036270 1.262733	3.41011e-05	1.17684	1.1048139 1.248875	0.000150943	1.22302	1.1298186 1.316215	0.000271218	37.9403	0.0613382	3.13018e-05	0.0683242	30
Free cholesterol (subclasses)
Free cholesterol levels in very small VLDL	Atrial fibrillation	1.04672	1.0015959 1.091846	0.0473295	0.961375	0.8478315 1.074919	0.499101	1.05669	1.0017675 1.111614	0.04909	1.04811	0.9965769 1.099647	0.0788808	1.0439	0.9676346 1.120170	0.273924	99.2837	0.00141688	0.0473295	0.931492	63
Phospholipids % (subclasses)
Phospholipids to total lipids ratio in medium VLDL	Atrial fibrillation	1.09158	1.0335927 1.149572	0.00305887	1.05818	0.9539338 1.162427	0.291932	1.05996	1.0014790 1.118438	0.050982	1.04747	0.9801756 1.114759	0.181843	1.05546	0.9533627 1.157563	0.304322	138.126	4.23857e-08	0.00305887	0.434993	62
Phospholipids to total lipids ratio in chylomicrons and extremely large VLDL	Atrial fibrillation	1.05518	1.0037444 1.106620	0.0406865	1.09367	0.9611107 1.226229	0.193443	1.10176	1.0359770 1.167552	0.00388535	1.0892	1.0284371 1.149960	0.00893398	1.12593	1.0387411 1.213113	0.0113032	60.0269	0.0128569	0.0406865	0.08308	40
Phospholipids (subclasses)
Phospholipids in IDL	Atrial fibrillation	1.06133	1.0044161 1.118236	0.040378	1.05607	0.9468600 1.165269	0.33136	1.06701	1.0068929 1.127121	0.034459	1.06973	1.0112249 1.128238	0.0274631	1.01601	0.9213625 1.110652	0.743381	135.187	2.31443e-07	0.040378	0.263068	64
Triglycerides % (subclasses)
Triglycerides to total lipids ratio in medium VLDL	Atrial fibrillation	0.919066	0.8621150 0.9760161	0.003677	0.993302	0.8504767 1.1361268	0.926752	0.985655	0.9224835 1.0488260	0.653929	0.993302	0.9179661 1.0686374	0.861648	0.953438	0.8568564 1.0500187	0.336255	187.817	4.79237e-11	0.003677	0.358868	81
Triglycerides to total lipids ratio in small VLDL	Atrial fibrillation	0.937628	0.8782616 0.9969951	0.0334844	0.943434	0.8154342 1.0714347	0.375886	0.980989	0.9187924 1.0431862	0.545279	0.97541	0.9080695 1.0427498	0.471253	0.945346	0.8460773 1.0446142	0.271269	167.949	4.72765e-11	0.0334844	0.839946	69
Triglycerides to total lipids ratio in large VLDL	Atrial fibrillation	0.930822	0.8816825 0.9799615	0.00424515	1.03253	0.9015291 1.1635237	0.634005	0.942835	0.8863591 0.9993110	0.0410649	0.953249	0.9020907 1.0044070	0.072322	0.915919	0.8363290 0.9955094	0.0352651	89.765	0.000891711	0.00424515	0.613967	54
Triglycerides to total lipids ratio in very large VLDL	Atrial fibrillation	0.908644	0.8428963 0.9743907	0.0042904	1.00632	0.8417266 1.1709125	0.940459	0.916748	0.8463733 0.9871216	0.0154817	0.91908	0.8113520 1.0268083	0.130162	0.882862	0.7634171 1.0023075	0.0455472	148.881	6.26753e-10	0.0042904	0.572811	60
Triglycerides to total lipids ratio in chylomicrons and extremely large VLDL	Atrial fibrillation	0.874114	0.8101639 0.9380637	3.72896e-05	0.875105	0.7458445 1.0043666	0.0559976	0.856862	0.7823719 0.9313512	4.80925e-05	0.854449	0.7811609 0.9277365	0.000396289	0.795856	0.6986886 0.8930227	0.000170985	36.0183	0.0217619	3.72896e-05	0.0287031	23
Triglycerides (subclasses)
Triglycerides in chylomicrons and extremely large VLDL	Atrial fibrillation	0.91848	0.8584615 0.9784983	0.00548687	0.888232	0.7548927 1.0215720	0.0868691	0.899153	0.8275352 0.9707712	0.00362348	0.8783	0.7944872 0.9621127	0.00362414	0.915728	0.8250559 1.0063996	0.0621826	142.328	3.01084e-09	0.00548687	0.930867	63
Fatty acids
Ratio of monounsaturated fatty acids to total fatty acids	Atrial fibrillation	0.936667	0.8791445 0.9941904	0.0257928	0.945981	0.8227725 1.0691897	0.380426	0.948022	0.8921775 1.0038669	0.0610127	0.971203	0.9215072 1.0208980	0.25356	0.95874	0.8713394 1.0461397	0.348428	164.135	3.57393e-11	0.0257928	0.489076	68
Partical size
Average diameter for VLDL particles	Atrial fibrillation	0.929839	0.8785021 0.9811767	0.0054819	0.896047	0.7589543 1.0331394	0.121228	0.9486	0.8887840 1.0084169	0.0838035	0.955393	0.8870284 1.0237576	0.195186	0.943519	0.8622837 1.0247538	0.165308	154.181	1.22533e-08	0.0054819	0.649538	75
Particle concentrations (subclasses)
Concentration of IDL particles	Atrial fibrillation	1.06477	1.0020843 1.127460	0.0497295	1.0321	0.9175713 1.146630	0.591199	1.04686	0.9806720 1.113055	0.175053	1.04938	0.9720746 1.126681	0.227663	0.984049	0.8789059 1.089192	0.765695	105.566	3.31089e-06	0.0497295	0.076967	50
Concentration of very small VLDL particles	Atrial fibrillation	1.05011	1.0069050 1.093312	0.0265454	0.956292	0.8421884 1.070396	0.445451	1.05343	0.9996368 1.107232	0.0578892	1.03612	0.9837729 1.088460	0.188649	1.04103	0.9689467 1.113123	0.278311	100.287	0.00325628	0.0265454	0.768245	66
Total lipids (subclasses)
Total lipids in chylomicrons and extremely large VLDL	Atrial fibrillation	0.936835	0.8733287 1.0003414	0.0440354	0.877716	0.7433624 1.0120696	0.0616396	0.928727	0.8612595 0.9961953	0.0317121	0.888865	0.7969877 0.9807425	0.014534	0.909774	0.8135190 1.0060291	0.058761	186.148	4.26017e-14	0.0440354	0.429047	69

## Sheet: TableS4
Table S4. Value of F statistic for each instrument of exposure that were causally associated with AF according to the IVW method.
Cholesterol to total lipids ratio in medium VLDL		Cholesterol to total lipids ratio in small VLDL		Cholesterol to total lipids ratio in large VLDL		Cholesterol to total lipids ratio in very large VLDL		Cholesterol to total lipids ratio in chylomicrons and extremely large VLDL		Cholesterol levels in very small VLDL		Cholesteryl esters to total lipids ratio in small VLDL		Cholesteryl esters to total lipids ratio in large VLDL		Cholesteryl esters to total lipids ratio in very large VLDL		Cholesteryl esters to total lipids ratio in chylomicrons and extremely large VLDL		Cholesteryl esters in very small VLDL		Cholesteryl esters to total lipids ratio in medium VLDL		Free cholesterol to total lipids ratio in medium VLDL		Free cholesterol to total lipids ratio in large VLDL		Free cholesterol to total lipids ratio in very large VLDL		Free cholesterol to total lipids ratio in chylomicrons and extremely large VLDL		Free cholesterol levels in very small VLDL		Phospholipids to total lipids ratio in medium VLDL		Phospholipids to total lipids ratio in chylomicrons and extremely large VLDL		Phospholipids in IDL		Triglycerides to total lipids ratio in medium VLDL		Triglycerides to total lipids ratio in small VLDL		Triglycerides to total lipids ratio in large VLDL		Triglycerides to total lipids ratio in very large VLDL		Triglycerides to total lipids ratio in chylomicrons and extremely large VLDL
SNP	F	SNP	F	SNP	F	SNP	F	SNP	F	SNP	F	SNP	F	SNP	F	SNP	F	SNP	F	SNP	F	SNP	F	SNP	F	SNP	F	SNP	F	SNP	F	SNP	F	SNP	F	SNP	F	SNP	F	SNP	F	SNP	F	SNP	F	SNP	F	SNP	F
rs13282367	29.8113	rs11971790	30.0119	rs144018203	29.7574	rs74515649	30.0411	rs3832943	30.7671	rs13010903	29.9398	rs28454618	29.8861	rs79598313	30.2236	rs13287131	29.8096	rs74515649	29.8911	rs28807203	28.3492	rs6953523	30.0642	rs61798840	30.3179	rs2229357	31.9628	rs8056944	29.8968	rs182050989	30.0151	rs117911817	29.8343	rs310631	29.8444	rs6078	29.753	rs12056034	28.8896	rs35163364	29.9784	rs310631	30.0307	rs2339905	29.9121	rs8103923	30.2321	rs1047964	34.1854
rs6953523	30.5422	rs704	30.4543	rs11601507	30.0791	rs472495	30.1369	rs1811241	31.1125	rs80017394	30.2343	rs7836397	30.2832	rs693668	31.0976	rs10773049	29.9122	rs7142704	31.2331	rs112819436	43.7174	rs7359336	30.2309	rs28454618	30.585	rs79225634	32.539	rs8056944	29.8968	rs117857195	32.6939	rs13076933	30.139	rs28929474	30.2663	rs10899106	31.0328	rs2326077	29.0096	rs17561950	30.0659	rs11601507	30.0892	rs77879697	30.0683	rs59784135	31.9662	rs849327	34.368
rs7134150	30.7254	rs735169	30.4928	rs138082291	30.7027	rs10020067	30.3559	rs17248727	32.0032	rs146407081	30.4274	rs1899951	30.7253	rs1247304	31.8963	rs67408364	29.9525	rs1247304	33.2311	rs11601507	79.3865	rs849327	30.6452	rs1899951	30.6736	rs5998509	34.5531	rs61941261	30.5692	rs17613367	33.4215	rs2539980	30.3691	rs10787429	32.2701	rs13108218	31.2391	rs10176901	29.3568	rs261265	30.1275	rs686030	30.2862	rs12899324	30.3412	rs8059755	33.6054	rs693668	35.4055
rs10798586	30.9273	rs565111	31.7213	rs17447211	30.7129	rs7707394	30.3849	rs57076989	32.4427	rs1500188	30.4363	rs6583899	30.9326	rs150844304	32.3547	rs116009877	30.6397	rs7187512	36.5993	rs8107974	100.355	rs3809868	30.7934	rs149654682	31.7243	rs150224153	34.7211	rs2518134	31.3909	rs1247304	35.7732	rs112103450	31.189	rs77303550	33.2297	rs4711301	31.2796	rs6016505	29.5777	rs679582	30.2644	rs35163364	30.5668	rs148608463	30.3629	rs849327	33.6414	rs57994353	37.6741
rs9584870	31.4212	rs28454618	31.8994	rs79113991	30.8755	rs1716183	30.3983	rs10274964	34.6612	rs2539980	30.4498	rs15922	31.1814	rs57994353	32.7097	rs2084152	30.6474	rs4722551	45.3102	rs1065853	120.517	rs10798586	30.8563	rs13229300	31.7844	rs2066718	35.3622	rs2294922	32.0256	rs56001710	37.0304	rs58530605	31.4715	rs40270	33.5023	rs2103827	32.0733	rs35135293	30.4627	rs79598313	30.3188	rs2803619	31.0988	rs115785198	32.5363	rs310631	33.7005	rs2294922	40.4977
rs2803619	31.6997	rs12212146	32.3315	rs1037116	31.6139	rs12179053	30.406	rs4783959	35.7425	rs9274488	31.4443	rs11971790	31.4125	rs4775090	33.2358	rs6606725	30.9036	rs17612845	52.6977	rs12151108	381.686	rs9259970	31.6131	rs849327	32.3053	rs2223745	36.9191	rs2618566	32.3205	rs144018203	37.1745	rs1293261	31.6227	rs57994353	33.6559	rs2304969	32.694	rs2820232	30.9712	rs7134150	30.4202	rs13229300	31.1253	rs2073547	32.7152	rs2294922	33.8896	rs7707394	41.2277
rs849327	31.8293	rs1436424	32.8271	rs686030	31.7953	rs12419462	30.567	rs11591147	36.4489	rs2141247	31.8491	rs73596816	31.9069	rs7091593	34.2166	rs144033177	31.1439	rs146534110	61.5075	rs12056034	437.521	rs7134375	31.7148	rs10747046	32.9609	rs77725792	37.8609	rs76895963	32.5077	rs885683	37.1844	rs55649657	31.847	rs2642438	34.5359	rs4986970	34.7813	rs2737245	32.2746	rs11601507	30.4971	rs28454618	31.7689	rs11601507	32.8416	rs2302263	34.3913	rs2229738	41.9152
rs17561950	31.8646	rs310631	33.5611	rs4775090	31.9187	rs6938550	30.5828	rs117857195	38.1661	rs4738679	31.9472	rs117738782	32.3451	rs2925979	34.2171	rs10020067	31.5392	rs738408	67.9285	rs72631343	470.799	rs13266992	31.7859	rs60208975	33.8685	rs12923787	39.1425	rs11601507	32.764	rs10274367	37.6709	rs11096640	32.1525	rs11688682	34.798	rs7012637	35.6062	rs80017394	32.8604	rs28454618	30.511	rs111278137	31.9348	rs6912327	33.1805	rs12426505	34.4132	rs2618566	48.665
rs3127580	31.8816	rs116009877	34.9277	rs1247304	32.9836	rs144033177	30.6873	rs40270	38.4431	rs72843670	32.6823	rs2073547	32.4849	rs1936807	34.562	rs1899951	31.6775	rs11591147	68.0079	rs28743711	575.74	rs78912080	31.9095	rs10787429	35.2985	rs9987289	39.3124	rs693668	33.4775	rs77732800	39.5179	rs2523675	32.4314	rs6583899	35.4535	rs73390208	36.9833	rs10260606	32.9319	rs6953523	30.7574	rs4055121	32.0762	rs11550299	34.555	rs1885659	35.7365	rs2302263	58.2507
rs1899951	32.1233	rs11601507	35.0599	rs11206517	34.2242	rs849327	30.9797	rs4336630	39.4319	rs1293261	33.4432	rs74747585	32.6035	rs8106814	36.3614	rs1716183	32.0039	rs12179053	73.1027	rs71542467	770.091	rs9584870	31.9656	rs11688682	35.7075	rs904770	39.3732	rs66921136	34.1585	rs174557	42.3667	rs4666000	32.5415	rs4307732	36.0892	rs34417180	38.2227	rs11601507	33.4126	rs10798586	30.9341	rs4466139	32.9839	rs11206517	35.1803	rs11688682	35.9712	rs3809868	59.6095
rs13241165	32.6581	rs1779820	35.8436	rs11688682	35.7076	rs111351217	31.3892	rs1247304	41.8901	rs653178	33.6302	rs116734477	33.0798	rs310631	36.8901	rs12426505	32.2603	rs17248727	81.0003	rs9302635	1257.14	rs1899951	32.055	rs11601507	36.1412	rs1047964	40.472	rs111351217	34.5719	rs40270	42.9378	rs3782257	34.6241	rs12294913	37.5822	rs4752973	38.7216	rs2740488	33.7541	rs9584870	31.6435	rs118059146	34.8172	rs11736932	35.993	rs57994353	36.2691	rs310631	90.8019
rs10747046	34.88	rs6905288	35.9472	rs2618566	35.7534	rs1899951	31.4801	rs4722551	42.6901	rs9616847	33.9044	rs2156552	33.7729	rs3809868	36.9561	rs74515649	32.3711	rs115478735	108.537	rs10260606	1259.99	rs4871624	32.4894	rs261265	36.4234	rs1047964	40.472	rs11075253	35.6112	rs1260326	52.9068	rs146407081	35.0435	rs653178	37.7149	rs6078854	39.8665	rs6102034	34.2947	rs1899951	31.7085	rs1037116	34.972	rs73596816	36.4631	rs12419237	36.8295	rs2925979	96.8083
rs2517671	35.7006	rs11066120	36.8904	rs310631	37.0614	rs8103923	32.2861	rs17612845	51.6459	rs2618566	34.8311	rs704	34.0159	rs849327	37.3822	rs77365023	33.1643	rs73596816	114.463	rs115478735	1264.29	rs17561950	34.0373	rs3127580	38.7544	rs3809868	40.611	rs3802932	35.8307	rs964184	53.4734	rs12804228	35.5276	rs59784135	39.7497	rs3936510	40.028	rs1500188	34.682	rs28639492	31.9543	rs11688682	35.3138	rs28478252	36.6173	rs693668	37.6085	rs59784135	115.295
rs79598313	35.9083	rs11688682	37.051	rs1899951	37.0684	rs77365023	32.4153	rs602633	66.2113	rs822928	35.9615	rs11736932	34.6827	rs1899951	38.4732	rs8103923	33.3107	rs1801689	132.406	rs1057208	1321.72	rs2642438	34.054	rs1047964	38.8577	rs4631704	41.8715	rs7091593	36.1086	rs146534110	55.2924	rs74747585	36.1947	rs11601507	39.8219	rs2297991	40.2849	rs1293261	35.9893	rs3127580	32.2972	rs3127580	36.4593	rs904770	38.2673	rs3809868	39.4957	rs114938914	122.994
rs679582	36.282	rs1037116	37.3718	rs7707394	37.8311	rs668459	33.7415	rs146534110	70.3897	rs2792735	37.9556	rs11688682	34.8927	rs3829502	39.089	rs12179053	33.4972	rs6073958	132.701	rs3798167	1593.16	rs150966173	34.5149	rs1047964	38.8577	rs2292318	43.0314	rs144022883	36.1219	rs60223219	56.5245	rs2495477	36.624	rs56015824	39.8228	rs112875651	41.3572	rs4860948	36.1781	rs849327	32.317	rs11065961	36.9062	rs2223745	38.4126	rs1047964	39.6887	rs7091593	153.674
rs10773049	36.455	rs4055121	38.0742	rs57994353	38.0304	rs60318332	34.046	rs12179053	85.1058	rs112819436	39.0807	rs11066120	35.0725	rs11075253	40.5204	rs12419462	34.0998	rs12740374	133.284	rs12740374	2126.59	rs10747046	34.8976	rs7091593	40.1711	rs3812595	43.2382	rs9677933	36.3209	rs28601761	59.2018	rs10260606	37.6022	rs2925979	42.0753	rs9939678	46.7024	rs7773004	37.3997	rs2803619	32.6495	rs11122450	37.6377	rs2066718	38.6878	rs1047964	39.6887	rs1885659	157.338
rs3809868	37.2603	rs6583899	39.4219	rs11066120	38.4747	rs59036878	34.1056	rs738408	86.142	rs10260606	39.8067	rs117310449	35.8059	rs3185010	41.4738	rs11688682	34.7454	rs34468875	149.378	rs61791721	2369.69	rs59036878	35.7177	rs78058190	44.2311	rs2738447	43.3192	rs2925979	37.4404	rs12179053	67.5212	rs9616847	38.9558	rs2244608	42.5117	rs139915535	47.3421	rs56015824	37.4173	rs2800709	32.7652	rs116009877	39.7161	rs1047964	42.4363	rs2618566	40.7632	rs12419237	261.648
rs2642438	37.4632	rs9687846	40.2785	rs40270	38.753	rs13241165	35.667	rs1065853	86.8544	rs56015824	39.8708	rs310631	36.3221	rs2618566	41.499	rs13241165	36.3191	rs1065853	226.608	rs2737245	3911.26	rs13241165	36.9414	rs59784135	44.5774	rs921919	45.2776	rs144018203	37.7333	rs72999033	73.3553	rs6602909	38.9842	rs6905288	42.9777	rs144439590	47.6487	rs10822145	38.9132	rs74747585	33.3791	rs57994353	39.769	rs1047964	42.4363	rs7091593	40.8006	rs1047964	276.731
rs653178	37.5626	rs11231721	41.1091	rs2306363	40.9804	rs11688682	36.7743	rs34468875	105.261	rs6102034	40.1138	rs735169	36.562	rs11066120	41.5932	rs12419237	37.3838	rs3127580	234.042	rs633695	4431.61	rs693668	39.6016	rs2517671	45.1152	rs1215112	45.4955	rs881817	37.839	rs115478735	75.4833	rs11601507	39.7193	rs74747585	43.7101	rs1047964	52.2522	rs140798831	39.7393	rs13229300	34.7129	rs6583899	40.6412	rs3808351	42.6558	rs2925979	40.8059	rs8059755	432.05
rs2800709	37.8299	rs686030	41.3606	rs28807203	44.3949	rs12419237	37.8474	rs115478735	112.739	rs11601507	40.5423	rs72823013	36.8343	rs7707394	41.8309	rs9769088	38.0087	rs35980001	317.956	rs6102034	5629.29	rs11688682	39.6058	rs653178	45.297	rs4752973	47.0966	rs184252375	39.4516	rs73307905	82.1533	rs822928	40.2104	rs261265	45.0488	rs1047964	52.2522	rs112819436	39.8427	rs10747046	35.853	rs6905288	41.5153	rs28377109	42.8082	rs7707394	40.8477	rs7534572	589.05
rs72555385	37.8573	rs2642438	41.5708	rs77697917	45.7266	rs79598313	37.8515	rs73307905	126.375	rs7241918	42.2972	rs59784135	36.9006	rs13179413	43.0535	rs2800710	38.1477	rs117733303	342.257	rs247616	5812.61	rs72555385	41.1967	rs2642438	45.3449	rs174576	48.0122	rs28807203	39.5302	rs738408	88.4751	rs75003668	40.763	rs10750766	45.943	rs35194512	52.4077	rs1461729	40.5307	rs2239725	36.6349	rs12212146	41.9688	rs4240624	43.2511	rs7534572	43.2903	rs11688682	646.643
rs11688682	39.6325	rs158482	43.532	rs2294922	46.0728	rs6855981	38.4508	rs1801689	154.408	rs62115478	42.5101	rs2618566	37.9806	rs28807203	43.1552	rs632057	38.4475	rs1532085	362.413	rs102274	6740.27	rs59784135	41.2188	rs1081105	47.2592	rs9304381	49.2342	rs10750766	39.6371	rs5112	112.839	rs4738679	40.889	rs2517671	48.9699	rs77732800	52.4231	rs7241918	41.6502	rs72647336	37.4005	rs59784135	44.6028	rs3785100	43.3683	rs2229738	45.0208	rs12426505	705.385
rs150966173	39.7004	rs74747585	44.3067	rs28929474	46.3995	rs2800710	39.2793	rs73596816	154.905	rs4860948	43.6094	rs2943634	39.0521	rs11688682	43.8265	rs6855981	38.9156	rs183130	495.806	rs7707394	7396.73	rs10773049	41.5859	rs12294913	49.6942	rs10692614	49.828	rs7707394	40.8802	rs821840	123.079	rs4860948	42.0866	rs144018203	50.896	rs8178824	56.2228	rs2618566	43.547	rs2642438	38.0828	rs2642438	44.9048	rs9302635	44.0231	rs114938914	46.3392	rs8103923	1166.97
rs1560390	40.8261	rs59784135	44.4712	rs3809868	46.9898	rs57994353	39.3671	rs3127580	257.106	rs61791721	45.821	rs2943634	39.0521	rs6905288	44.5772	rs11075253	39.228	rs118039278	1003.5	rs3843482	8238.92	rs679582	41.7015	rs3809868	51.1868	rs117733303	50.5408	rs6544713	41.3061	rs1801689	127.345	rs77960347	42.775	rs190543502	52.1622	rs4646272	56.4407	rs2792735	46.3771	rs653178	39.0497	rs3809868	45.6769	rs2376867	44.8122	rs111427795	49.7397
rs2239725	40.8358	rs2925979	44.4877	rs3185010	49.8412	rs2302263	40.1674	rs821840	397.086	rs2642438	46.0453	rs2306363	39.269	rs28929474	46.725	rs79225634	39.6025			rs2495477	8957.9	rs72959041	42.2148	rs12212146	51.2141	rs61805075	50.6563	rs3185010	41.365	rs73596816	171.338	rs1471251	44.8091	rs693668	54.1073	rs1260326	66.3509	rs261274	46.7678	rs2517671	39.776	rs11231721	46.6479	rs1215112	46.5884	rs146534110	50.8776
rs183130	41.0278	rs3127580	45.1997	rs62188784	50.4484	rs11075253	40.9421	rs117733303	458.31	rs2495477	47.2604	rs1037116	39.9996	rs3747207	47.2172	rs2302263	40.4583			rs112875651	8989.81	rs79598313	42.5176	rs2925979	53.2867	rs71542468	51.3018	rs261265	45.1202	rs3127580	196.21	rs4794048	51.0221	rs2618566	54.6653	rs4273010	70.2675	rs77303550	47.4382	rs11688682	40.2209	rs74747585	49.5204	rs117738782	46.8321	rs9769088	53.9351
rs59784135	43.2268	rs57994353	45.7292	rs4722551	55.2509	rs2618566	41.1501	rs2070895	461.212	rs4794048	47.3244	rs11601507	40.6366	rs10750766	49.9692	rs2618566	40.6425			rs10282584	10253.5	rs9769088	43.3724	rs693668	53.4979	rs72823013	52.6886	rs498475	45.47	rs117733303	482.646	rs11753995	51.2958	rs117733303	59.3623	rs738408	73.3804	rs72836561	47.8384	rs3809868	43.5566	rs2618566	49.8809	rs3809868	47.2277	rs72836561	55.564
rs693668	43.6728	rs3809868	47.5907	rs114938914	56.6004	rs9769088	43.9461	rs1532085	509.733	rs74747585	47.4058	rs28929474	42.6905	rs114938914	50.3594	rs1885659	41.6761			rs1500188	12595.5	rs13108218	43.4487	rs3185010	53.5853	rs77960347	55.8645	rs9302635	45.8252	rs1077835	605.085	rs11206517	52.2764	rs3809868	60.0671	rs3127580	108.381	rs72631343	47.9631	rs59784135	43.8447	rs9687846	50.5686	rs17447211	49.2433	rs6073966	57.4028
rs72647336	45.3475	rs2618566	47.9836	rs261265	57.3999	rs72647336	44.3222	rs10455872	1293.5	rs75003668	50.0026	rs150844304	45.6508	rs4336630	51.2268	rs79598313	41.8616			rs10822145	14281.6	rs114938914	48.5643	rs11429307	54.5182	rs13702	57.6184	rs56001710	46.7707	rs1532085	654.636	rs72631343	53.3966	rs2972156	63.4719	rs174576	108.496	rs653178	49.4188	rs7091593	45.9853	rs6073966	50.6123	rs13702	49.8953	rs3936510	57.5799
rs9769088	47.9178	rs10750766	51.534	rs146534110	57.9806	rs1885659	45.1375			rs11753995	50.0572	rs3809868	46.1439	rs34514836	51.6817	rs57994353	42.1487			rs4794048	14457.2	rs2618566	48.6934	rs4336630	54.8879	rs3127580	71.4309	rs28929474	47.3086	rs10455872	1208.47	rs439523	57.2283	rs9769088	66.6882	rs55747707	121.737	rs2642438	51.1574	rs693668	47.2864	rs10750766	53.8152	rs28929474	51.0964	rs150844304	58.3146
rs7091593	47.9641	rs693668	59.769	rs34171564	58.3787	rs7091593	46.2371			rs2737245	50.433	rs174537	46.551	rs1561748	53.9259	rs72647336	45.5249			rs1635852	16033.1	rs11075253	48.8818	rs11075253	55.3529	rs77542162	86.3609	rs3127580	50.3468			rs869412	59.8924	rs2569550	68.0035	rs116843064	135.563	rs75003668	52.2708	rs11075253	47.8587	rs2925979	54.6163	rs114938914	51.7162	rs144018203	58.5286
rs11075253	51.253	rs4336630	62.979	rs9769088	65.0499	rs6073966	46.3119			rs439523	52.251	rs7952602	48.9183	rs1561748	53.9259	rs7091593	45.5331			rs653178	16711.7	rs7091593	49.2115	rs2618566	56.7715	rs112771035	95.3733	rs73596816	50.5439			rs2737245	62.2112	rs4722551	69.3642	rs4665710	195.047	rs496654	52.6913	rs78058190	49.8388	rs693668	60.3505	rs72823013	53.9191	rs28807203	69.9694
rs2618566	51.8114	rs9259970	68.1524	rs75911530	67.069	rs79225634	49.7591			rs72631343	53.0346	rs693668	49.8731	rs144018203	56.1323	rs2925979	52.8643			rs10410835	16807.1	rs72647336	51.1944	rs9769088	56.9191	rs112875651	101.846	rs6905288	50.8423			rs2738447	63.0821	rs34171564	74.4117	rs15285	247.004	rs3798167	54.9021	rs150966173	50.0117	rs9259970	63.3439	rs3747207	54.0561	rs4336630	72.1914
rs78058190	54.8422	rs150966173	68.7122	rs7082470	67.1169	rs2229738	52.7395			rs11206517	60.4043	rs144018203	52.8545	rs40270	58.5081	rs2229738	54.3052			rs496654	16841.8	rs7707394	54.3322	rs6905288	57.1219	rs2376867	109.257	rs13179413	50.8868			rs7707394	64.5689	rs1561748	79.7617	rs964184	398.675	rs56325564	57.1918	rs9769088	53.1661	rs111427795	66.2074	rs2569550	54.539	rs12677504	73.289
rs114938914	56.8383	rs2569550	70.4212	rs147711004	68.2547	rs2925979	53.1744			rs140798831	61.7132	rs1561748	53.3489	rs261265	60.99	rs146534110	57.099			rs1293261	17370.6	rs78058190	57.1516	rs11122450	57.5192	rs1801689	116.126	rs77697917	53.5122			rs4812975	73.0732	rs1561748	79.7617	rs56393506	413.205	rs67276129	57.9763	rs2618566	54.2795	rs1081105	71.4072	rs13358429	56.8965	rs4722551	73.6077
rs11231721	58.2397	rs2943634	72.2416	rs3129774	71.3438	rs146534110	54.1766			rs12208357	62.0033	rs1561748	53.3489	rs146534110	63.3839	rs28807203	66.7408			rs13010903	18295.3	rs11231721	61.6673	rs10750766	59.2608	rs7528419	117.425	rs40270	55.6823			rs9302635	75.9008	rs3129774	83.2058	rs3764261	608.543	rs10282584	59.2737	rs12294913	54.8853	rs7707394	76.3251	rs117733303	71.8297	rs79225634	80.6673
rs60318332	60.7995	rs2943634	72.2416	rs13358429	72.0376	rs28807203	62.5325			rs9302635	62.2513	rs1779820	54.4506	rs4722551	66.3858	rs1601935	67.5074			rs56015824	18626.3	rs10750766	63.3303	rs8103315	64.4387	rs75911530	135.22	rs9769088	56.0991			rs34330586	76.0489	rs7707394	84.5483	rs139953093	658.71	rs2738447	60.9413	rs12212146	55.7203	rs4299376	82.5145	rs112875651	72.6263	rs73596816	81.1469
rs7707394	61.0948	rs7707394	73.7114	rs325	82.9319	rs1047964	72.0372			rs2738447	62.7824	rs3812595	55.4225	rs6073966	68.2675	rs3129774	69.0629			rs2738447	21355.4	rs60318332	64.39	rs7534572	65.2623	rs11591147	139.849	rs2954038	59.6345			rs12208357	76.821	rs150966173	85.5782	rs1532085	893.696	rs111278137	61.5207	rs60318332	56.9877	rs2943634	83.3736	rs9272546	73.816	rs62188784	81.8605
rs10750766	63.5548	rs4299376	84.3539	rs174537	83.1259	rs1047964	72.0372			rs77960347	69.9955	rs7707394	58.2686	rs77697917	69.1254	rs34171564	69.6287			rs2141247	22416	rs12212146	67.2464	rs7707394	75.8933	rs12914626	147.46	rs7896518	60.5698			rs1883711	80.302	rs6544713	90.795	rs1077835	911.158	rs1169292	66.201	rs1047964	58.5173	rs2943634	83.3736	rs3127580	84.7444	rs10822168	82.5969
rs12212146	63.5991	rs3129774	87.6321	rs73596816	96.1784	rs34171564	74.5704			rs10282584	71.6362	rs144439590	63.3266	rs9769088	70.5643	rs77542162	73.8058			rs2393775	22771.4	rs6905288	72.2159	rs114938914	77.4959	rs118039278	182.885	rs147711004	62.5007			rs60403635	83.8803	rs6073966	94.9361	rs1065853	1426.35	rs8103315	68.152	rs1047964	58.5173	rs4336630	84.3347	rs112771035	88.696	rs3129774	87.3703
rs2925979	68.6991	rs3789849	90.7025	rs12740374	135.171	rs72836561	75.2559			rs72848251	73.4351	rs3127580	63.4429	rs34171564	71.9948	rs147711004	75.2897			rs261274	23756.5	rs2925979	72.9035	rs3129774	78.1636	rs934197	195.949	rs2572431	71.2593			rs118170342	84.639	rs7075901	107.09			rs77960347	68.7346	rs10750766	60.7258	rs3129774	86.1727	rs6073958	107.135	rs3127580	96.8264
rs6905288	69.0645	rs190543502	94.3059	rs3127580	138.987	rs147711004	75.798			rs4704834	81.5822	rs9259970	68.3421	rs13358429	72.4531	rs72836561	77.0297			rs35088884	23920.8	rs3129774	82.2528	rs4722551	82.9452	rs12151108	200.403	rs2972138	74.7511			rs10096633	85.847	rs72836561	121.623			rs147841808	68.8109	rs2925979	64.2194	rs3789849	88.6915	rs7528419	131.219	rs147711004	97.6006
rs1047964	72.1404	rs144018203	96.0137	rs77542162	141.255	rs3129774	78.9705			rs7707394	82.4057	rs10468017	68.8324	rs62188784	79.6819	rs1047964	79.0253			rs4704834	24005.7	rs1601935	83.5525	rs34171564	82.9657	rs115478735	212.978	rs602633	74.9177			rs115445558	86.8984	rs1801689	123.398			rs472495	70.8776	rs6905288	64.5644	rs1801689	95.8355	rs77542162	133.163	rs77542162	118.669
rs1047964	72.1404	rs4722551	97.2018	rs964184	141.965	rs481069	80.8027			rs261274	85.9068	rs686030	69.3932	rs3129774	82.755	rs1047964	79.0253			rs7534572	24175.1	rs11122450	83.764	rs190543502	86.4843	rs429358	341.366	rs79225634	80.0668			rs72848251	90.018	rs147711004	130.394			rs7534572	76.7696	rs114938914	65.4892	rs4722551	100.756	rs1801689	133.395	rs934197	142.444
rs11122450	78.6904	rs1801689	108.523	rs1260326	160.605	rs11429307	82.1633			rs118170342	94.8857	rs4722551	75.3027	rs10822163	83.2599	rs481069	83.6972			rs261290	24357.6	rs1047964	84.8544	rs144018203	88.8176	rs6073958	439.007	rs3129774	90.3376			rs2393776	92.6461	rs28807203	131.684			rs6882345	77.8529	rs11122450	66.7029	rs144018203	110.712	rs75911530	133.435	rs12740374	146.983
rs11429307	82.9943	rs7534572	108.535	rs3812316	186.031	rs4722551	83.8136			rs2393775	95.5868	rs114938914	76.6373	rs660240	112.354	rs9687846	85.6397			rs140798831	24361.3	rs1047964	84.8544	rs2972156	96.9247	rs7350789	446.111	rs77542162	108.518			rs261274	93.5717	rs780094	149.695			rs6073971	81.4461	rs7707394	67.9609	rs190543502	112.755	rs429358	191.98	rs1801689	148.366
rs3129774	83.542	rs1561748	124.062	rs115478735	188.645	rs77542162	84.2221			rs4299376	107.012	rs3789849	78.8531	rs73596816	115.508	rs1077834	86.8741			rs2618566	24618.5	rs13358429	88.4813	rs10822163	107.305	rs821840	2328.3	rs115478735	121.632			rs115478735	110.701	rs13358429	152.15			rs7707394	98.5929	rs11429307	71.1338	rs7534572	119.011	rs11591147	220.055	rs115478735	180.534
rs3789849	91.625	rs1561748	124.062	rs117733303	191.223	rs150844304	86.4315			rs115478735	129.042	rs2569550	79.0714	rs77542162	134.549	rs4722551	90.7119			rs7241918	24710.3	rs11429307	92.3422	rs2927468	109.099			rs1801689	122.748			rs4704834	111.225	rs115478735	193.353			rs4299376	124.701	rs4336630	82.0321	rs117733303	125.22	rs115478735	230.953	rs174537	200.177
rs4722551	93.2079	rs72836561	129.975	rs1801689	192.685	rs13389219	88.2046			rs7534572	132.611	rs7534572	79.6923	rs3127580	136.72	rs141820146	94.008			rs4738679	24714.8	rs3789849	92.6124	rs28807203	119.454			rs934197	131.779			rs77542162	150.753	rs77542162	193.5			rs58542926	129.078	rs183130	83.639	rs10822145	125.473	rs934197	288.569	rs1532085	211.342
rs13358429	101.696	rs3846662	130.829	rs934197	208.875	rs10822168	93.0964			rs8107974	134.198	rs3129774	83.1366	rs934197	164.846	rs150844304	94.593			rs562338	25100.1	rs1077834	93.6749	rs1561748	123.492			rs12679834	146.359			rs8107974	157.444	rs10455872	202.805			rs115478735	132.499	rs3129774	86.2306	rs3846662	132.467	rs12151108	296.759	rs12679834	227.307
rs4336630	104.885	rs117733303	132.453	rs6073972	229.918	rs144018203	99.3153			rs1057208	167.054	rs72836561	84.8841	rs325	189.889	rs13389219	94.9709			rs4299376	25109.5	rs4722551	93.9356	rs1561748	123.492			rs117733303	169.91			rs12916	157.891	rs174537	228.616			rs10410835	144.574	rs7534572	89.5126	rs72836561	143.739	rs10455872	307.096	rs1077834	253.983
rs147711004	111.743	rs147711004	158.78	rs115478735	251.856	rs7534572	102.96			rs77542162	177.373	rs7082470	105.179	rs1801689	192.097	rs10822168	95.762			rs2539980	25576.8	rs13389219	96.8162	rs1801689	124.659			rs11591147	200.81			rs964184	160.146	rs581411	261.945			rs112875651	144.83	rs34171564	90.363	rs1561748	151.716	rs12914626	408.118	rs11591147	261.42
rs190543502	112.498	rs934197	164.5	rs11591147	252.293	rs73596816	103.783			rs12916	180.552	rs3846662	108.187	rs174537	203.467	rs1515098	111.337			rs2642438	26012.3	rs147711004	110.845	rs117733303	126.289			rs73015021	233.543			rs7534572	174.59	rs325	274.972			rs1081105	146.724	rs4722551	91.2077	rs1561748	151.716	rs7350789	1134.01	rs12151108	269.83
rs7534572	115.69	rs28807203	169.298	rs1260326	276.384	rs1561748	107.322			rs112875651	201.727	rs75911530	115.684	rs115478735	215.862	rs73596816	111.793			rs2792735	26334	rs77542162	111.42	rs183130	130.885			rs183130	262.043			rs102274	182.8	rs12740374	285.785			rs77542162	146.798	rs190543502	100.545	rs77542162	152.09	rs183130	2260.29	rs34062580	299.927
rs10822168	116.77	rs77542162	172.314	rs12151108	284.452	rs1561748	107.322			rs102274	273.984	rs117733303	125.628	rs73015020	245.956	rs144018203	111.932					rs34722314	114.565	rs13358429	134.32			rs174537	266.903			rs12740374	306.666	rs13229619	316.198			rs28807203	156.32	rs2972143	108.97	rs10221768	158.165			rs117733303	308.361
rs28807203	119.342	rs174537	182.535	rs11591147	294.705	rs1515098	107.81			rs12740374	295.086	rs1801689	128.735	rs11591147	247.545	rs1561748	116.865					rs28807203	115.501	rs72836561	135.807			rs964184	268.777			rs112875651	307.617	rs183130	338.611			rs3843482	201.885	rs144018203	110.725	rs115478735	163.227			rs1260326	313.135
rs2943654	119.911	rs12740374	184.756	rs117733303	298.288	rs3127580	111.433			rs247616	317.704	rs12976395	147.77	rs1260326	276.544	rs1561748	116.865					rs10822168	117.195	rs77542162	164.957			rs34062580	312.224			rs11591147	366.917	rs964184	350.596			rs102274	312.988	rs13358429	115.372	rs147711004	164.349			rs964184	346.241
rs1801689	124.706	rs115478735	188.645	rs12151108	310.735	rs12740374	119.831			rs562338	389.92	rs1260326	192.758	rs34062580	286.133	rs3127580	120.943					rs150844304	119.943	rs934197	168.996			rs139953093	362.23			rs821840	370.335	rs11591147	439.556			rs12740374	448.374	rs10822168	117.664	rs28807203	182.839			rs183130	519.398
rs174418	126.865	rs117733303	191.223	rs12740374	315.262	rs1532085	123.267			rs11591147	424.989	rs77542162	195.209	rs964184	319.281	rs7534572	122.653					rs1801689	121.267	rs115478735	179.547			rs1260326	363.197			rs693	456.509	rs12151108	519.032			rs11591147	466.48	rs147711004	119.788	rs174537	239.665			rs10455872	743.926
rs144018203	127.232	rs6073972	229.918	rs10455872	363.647	rs4336630	125.567			rs12151108	624.378	rs12679834	213.111	rs117733303	374.05	rs12740374	128.308					rs4336630	123.91	rs12740374	238.356			rs1532085	419.919			rs73015024	557.916	rs1532085	612.714			rs562338	474.027	rs28807203	126.102	rs1260326	296.428			rs1065853	1440.06
rs77542162	127.316	rs1260326	276.384	rs1260326	377.589	rs115478735	150.276			rs633695	852.865	rs115478735	216.683	rs183130	655.538	rs4336630	137.03					rs115478735	126.657	rs6073972	238.732			rs10455872	429.398			rs633695	1023.86	rs1077834	667.512			rs633695	500.374	rs1801689	128.062	rs12740374	311.366
rs34722314	128.781	rs11591147	294.705	rs174537	393.302	rs1077834	152.506			rs261290	1692.9	rs934197	219.691	rs1065853	749.892	rs115478735	149.004					rs2943654	126.888	rs1260326	263.083			rs1077834	485.271			rs1065853	1131.07	rs1065853	2963.82			rs12151108	661.393	rs77542162	145.267	rs10455872	337.273
rs115478735	142.921	rs12151108	310.735	rs10455872	414.635	rs1801689	155.885			rs1065853	2093.63	rs12740374	295.029	rs1532085	776.077	rs1801689	153.365					rs7534572	134.91	rs1532085	307.975			rs1065853	635.427			rs261290	2013.78					rs261290	926.282	rs34722314	152.908	rs183130	363.675
rs1077834	144.066	rs12740374	315.262	rs11591147	414.715	rs73015020	164.675					rs3812316	334.232	rs1077834	852.277	rs116843064	157.695					rs144018203	139.782	rs1077834	323.993													rs1065853	3902.56	rs1561748	154.561	rs11591147	401.895
rs72836561	171.225	rs10455872	363.647	rs3812316	447.595	rs11591147	192.475					rs10455872	372.94	rs10455872	972.737	rs11591147	177.821					rs12740374	164.927	rs10455872	361.485															rs1561748	154.561	rs12151108	459.634
rs1561748	174.371	rs1260326	377.589	rs12679834	464.702	rs183130	227.586					rs11591147	394.828			rs183130	203.051					rs72836561	180.868	rs11591147	373.569															rs115478735	158.241	rs3812316	466.404
rs1561748	174.371	rs174537	393.302	rs12151108	484.308	rs174537	235.726					rs964184	398.442			rs174554	213.386					rs1561748	189.672	rs3812316	414.407															rs117733303	161.08	rs328	568.927
rs12740374	184.756	rs10455872	414.635	rs3812316	495.279	rs34062580	353.708					rs12151108	475.049			rs34062580	339.383					rs1561748	189.672	rs328	419.478															rs72836561	164.625	rs964184	770.389
rs117733303	191.223	rs11591147	414.715	rs328	643.145	rs1260326	368.374					rs183130	1848.04			rs1260326	343.484					rs117733303	211.346	rs73015024	433.212															rs6073972	200.92	rs1065853	4155.67
rs6073972	229.918	rs3812316	447.595	rs1065853	671.733	rs328	421.48					rs1065853	2271.3			rs117733303	468.636					rs6073972	219.888	rs174537	493.318															rs1532085	206.537
rs11591147	294.705	rs12679834	464.702	rs964184	678.259	rs117733303	422.948									rs328	476.979					rs11591147	261.617	rs964184	650.338															rs12740374	211.025
rs12151108	310.735	rs12151108	484.308	rs183130	722.127	rs964184	586.857									rs964184	640.626					rs73015021	264.417	rs1065853	2823.84															rs1077834	231.448
rs1260326	377.589	rs3812316	495.279	rs1532085	765.757	rs10455872	941.868									rs10455872	1025.17					rs174537	350.419																	rs11591147	333.041
rs174537	393.302	rs328	643.145	rs2070895	813.363	rs1065853	1372.86									rs1065853	1539.21					rs1260326	411.757																	rs1260326	335.839
rs10455872	414.635	rs964184	678.259	rs10455872	820.919																	rs10455872	419.584																	rs12151108	361.501
rs3812316	495.279	rs183130	722.127	rs964184	902.143																	rs3812316	512.013																	rs174537	364.953
rs328	643.145	rs964184	902.143	rs183130	1245.72																	rs328	720.157																	rs10455872	376.653
rs964184	902.143	rs1065853	2932.63	rs1065853	2932.63																	rs964184	983.436																	rs3812316	466.328
rs1065853	2932.63	rs1065853	3636.49	rs1065853	3636.49																	rs1065853	2880.85																	rs328	565.404
																																								rs964184	781.682
																																								rs1065853	3041.13
[truncated: 14 more columns]

## Sheet: TableS5
Table S5 Multivariable MR Analysis of lipid subfractions and atrial fibrillation was performed using the IVW method.
Note: P value less than 0.05 was considered significant(marked in red)
Target	GWAS ID	Group	Method	P value	OR	or_lci95	or_upci95
Cholesterol to total lipids ratio in medium VLDL	ebi-a-GCST90092917	cholesterol% subclass	IVW	0.246821	0.884265	0.718088	1.0889
Cholesterol to total lipids ratio in small VLDL	ebi-a-GCST90092969			0.883646	1.0255	0.731937	1.43681
Cholesterol to total lipids ratio in large VLDL	ebi-a-GCST90092869			0.228409	1.11033	0.936459	1.31649
Cholesterol to total lipids ratio in very large VLDL	ebi-a-GCST90093017			0.691252	0.910767	0.574221	1.44456
Cholesterol to total lipids ratio in chylomicrons and extremely large VLDL	ebi-a-GCST90093041			0.0530618	1.33594	0.996177	1.79159
Cholesteryl esters to total lipids ratio in medium VLDL	ebi-a-GCST90092919	cholesterol ester% subclass	IVW	0.778337	0.96856	0.7754	1.20984
Cholesteryl esters to total lipids ratio in small VLDL	ebi-a-GCST90092971			0.902187	0.977954	0.685353	1.39548
Cholesteryl esters to total lipids ratio in large VLDL	ebi-a-GCST90092871			0.854566	0.98972	0.886185	1.10535
Cholesteryl esters to total lipids ratio in very large VLDL	ebi-a-GCST90093019			0.651488	1.08757	0.755542	1.56552
Cholesteryl esters to total lipids ratio in chylomicrons and extremely large VLDL	ebi-a-GCST90093043			0.276239	1.15865	0.888849	1.51036
Free cholesterol to total lipids ratio in medium VLDL	ebi-a-GCST90092921	free cholesterol% subclass	IVW	0.398072	1.03389	0.956982	1.11698
Free cholesterol to total lipids ratio in large VLDL	ebi-a-GCST90092873			0.582257	1.05522	0.871307	1.27795
Free cholesterol to total lipids ratio in very large VLDL	ebi-a-GCST90093021			0.689529	0.951085	0.743635	1.21641
Free cholesterol to total lipids ratio in chylomicrons and extremely large VLDL	ebi-a-GCST90093045			0.0144884	1.14587	1.02737	1.27803
Phospholipids to total lipids ratio in medium VLDL	ebi-a-GCST90092925	phospholipids% subclass	IVW	0.00187895	1.09044	1.03251	1.15161
Phospholipids to total lipids ratio in chylomicrons and extremely large VLDL	ebi-a-GCST90093049			0.0788784	1.05513	0.993826	1.12022
Triglycerides to total lipids ratio in medium VLDL	ebi-a-GCST90092927	triglycerides% subclass	IVW	0.686761	1.02232	0.918329	1.13808
Triglycerides to total lipids ratio in small VLDL	ebi-a-GCST90092979			0.312566	1.15871	0.870574	1.54222
Triglycerides to total lipids ratio in large VLDL	ebi-a-GCST90092879			0.404293	1.08475	0.895982	1.31328
Triglycerides to total lipids ratio in very large VLDL	ebi-a-GCST90093027			0.0422458	0.702004	0.49895	0.987692
Average diameter for VLDL particles	ebi-a-GCST90093002	VLDL associated subclass	IVW	0.0069964	0.89166	0.820366	0.96915
Cholesterol levels in very small VLDL	ebi-a-GCST90093028			0.607461	7.95919	0.00290839	21781.4
Concentration of very small VLDL particles	ebi-a-GCST90093035			0.787739	0.686247	0.0442725	10.6372
Cholesteryl esters in very small VLDL	met-d-XS_VLDL_CE			0.914834	0.939954	0.30215	2.92409
Free cholesterol levels in very small VLDL	ebi-a-GCST90093032			0.566873	0.194831	0.000721831	52.5873
Phospholipids in IDL	met-d-IDL_PL	IDL associated subclass	IVW	0.747627	1.03471	0.840546	1.27372
Concentration of IDL particles	ebi-a-GCST90092838			0.752086	1.03157	0.850645	1.25097
Triglycerides in chylomicrons and extremely large VLDL	met-d-XXL_VLDL_TG	others	IVW	0.429812	0.944215	0.81881	1.08883
Total lipids in chylomicrons and extremely large VLDL	met-d-XXL_VLDL_L			0.0336126	2.37946	1.0695	5.29389
Ratio of monounsaturated fatty acids to total fatty acids	ebi-a-GCST90092929			0.0156604	0.402943	0.192793	0.842162

## Sheet: TableS6
Table S6. The main significant results of MR estimation and pleiotropy assessment for 30 kinds of lipid related traits on AF/Flutter.
Note: Causal effects estimated using two-sample MR methods (IVW, Simple mode, weighted median, Weighted mode and MR-Egger method). P value < 0.05 was considered significant in IVW method(marked in red);Exposure marked with yellow underline indicate the presence of pleiotropy and results were discarded.
Exposure	GWAS ID	Outcome	IVW method			Simple mode			Weighted median method			Weighted mode method			MR-Egger method			Cochran’s,Q		random effects model	Heterogenity P-value
			Estimate (OR)	95%CI	P value	Estimate (OR)	95%CI	P value	Estimate (OR)	95%CI	P value	Estimate (OR)	95%CI	P value	Estimate (OR)	95%CI	P value	Q	P value	P value	P value	Number of Ivs
Cholesterol to total lipids ratio in medium VLDL	ebi-a-GCST90092917	Atrial fibrillation and flutter	1.13719	0.9899833,1.284388	0.0869464	0.987281	0.6545932,1.319968	0.940109	1.01926	0.8681092,1.170407	0.804636	0.959593	0.7093991,1.209786	0.747609	1.19045	0.9391034,1.441804	0.178634	210.257	1.06996e-16	0.0869464	0.660077	72
Cholesterol to total lipids ratio in small VLDL	ebi-a-GCST90092969	Atrial fibrillation and flutter	1.16934	1.0346533,1.304025	0.0228127	1.07248	0.7908364,1.354134	0.628106	1.08418	0.9302637,1.238089	0.303381	1.07248	0.8653659,1.279605	0.510454	1.10079	0.8762533,1.325326	0.405399	150.253	4.05943e-10	0.0228127	0.511345	62
Cholesterol to total lipids ratio in large VLDL	ebi-a-GCST90092869	Atrial fibrillation and flutter	1.20805	1.0764998,1.339608	0.00486205	1.11454	0.8161228,1.412947	0.479635	1.23833	1.0912833,1.385384	0.00438232	1.14778	0.9989851,1.296583	0.0754375	1.49522	1.2858064,1.704634	0.000446413	119.458	1.29266e-07	0.00486205	0.0162113	51
Cholesterol to total lipids ratio in very large VLDL	ebi-a-GCST90093017	Atrial fibrillation and flutter	1.19472	1.0524346,1.337013	0.0142564	1.3093	0.9169623,1.701635	0.182881	1.27788	1.1082876,1.447481	0.00459979	1.4468	1.0300135,1.863581	0.0871338	1.32113	1.0658352,1.576421	0.0363357	164.797	1.27234e-10	0.0142564	0.355658	69
Cholesterol to total lipids ratio in chylomicrons and extremely large VLDL	ebi-a-GCST90093041	Atrial fibrillation and flutter	1.41402	1.2015737,1.626473	0.00139276	1.29811	0.9694322,1.626786	0.132827	1.43001	1.2457693,1.614259	0.000141774	1.4513	1.3040213,1.598580	4.63894e-05	1.8793	1.5664816,2.192123	0.000632218	75.9475	2.65448e-07	0.00139276	0.0317873	25
Cholesterol levels in very small VLDL	ebi-a-GCST90093028	Atrial fibrillation and flutter	1.15987	1.0375917,1.282142	0.0174425	1.04644	0.8068029,1.286075	0.711889	1.13296	1.0038508,1.262079	0.0580809	1.13412	1.0133236,1.254919	0.0460372	1.2005	1.0032565,1.397749	0.0750506	121.199	4.52221e-07	0.0174425	0.663054	56
Cholesteryl esters to total lipids ratio in medium VLDL	ebi-a-GCST90092919	Atrial fibrillation and flutter	1.12383	0.9843178,1.263346	0.100982	0.850961	0.5446549,1.157268	0.305573	0.985624	0.8260413,1.145207	0.858842	0.850961	0.6198350,1.082087	0.175833	1.11891	0.8816890,1.356134	0.356729	180.441	8.44642e-13	0.100982	0.96424	70
Cholesteryl esters to total lipids ratio in small VLDL	ebi-a-GCST90092971	Atrial fibrillation and flutter	1.1774	1.0605727,1.294226	0.00614733	1.14533	0.8527754,1.437879	0.367006	1.00657	0.8666229,1.146517	0.926925	1.07735	0.9191342,1.235566	0.359783	1.16216	0.9744468,1.349881	0.122053	116.827	1.1013e-05	0.00614733	0.861952	64
Cholesteryl esters to total lipids ratio in large VLDL	ebi-a-GCST90092871	Atrial fibrillation and flutter	1.1762	1.0335553,1.318842	0.0257523	1.14489	0.8147362,1.475046	0.425271	1.23527	1.0897026,1.380843	0.00444261	1.20906	1.0457671,1.372350	0.026591	1.45361	1.2192529,1.687961	0.00283261	157.573	7.83801e-12	0.0257523	0.0327968	59
Cholesteryl esters to total lipids ratio in very large VLDL	ebi-a-GCST90093019	Atrial fibrillation and flutter	1.17004	1.0282735,1.311813	0.0299218	1.14977	0.7235481,1.575986	0.523277	1.22064	1.0576071,1.383679	0.0165346	1.35723	0.8395535,1.874902	0.251725	1.28149	1.0368095,1.526165	0.0512309	166.799	6.79333e-11	0.0299218	0.374196	69
Cholesteryl esters to total lipids ratio in chylomicrons and extremely large VLDL	ebi-a-GCST90093043	Atrial fibrillation and flutter	1.43324	1.2154557,1.651014	0.00119787	1.31623	0.9712315,1.661224	0.134202	1.30462	1.1041096,1.505139	0.00934197	1.28922	1.0590925,1.519343	0.0427729	2.02355	1.6456221,2.401476	0.00168194	64.6569	1.32346e-06	0.00119787	0.0480963	21
Cholesteryl esters in very small VLDL	met-d-XS_VLDL_CE	Atrial fibrillation and flutter	1.1615	1.037176,1.285828	0.0182632	1.17509	0.939217,1.410958	0.185959	1.15586	1.021324,1.290394	0.0348421	1.13804	1.018800,1.257289	0.0384123	1.22567	1.023501,1.427843	0.054062	112.523	1.56838e-06	0.0182632	0.51014	53
Free cholesterol to total lipids ratio in medium VLDL	ebi-a-GCST90092921	Atrial fibrillation and flutter	1.13865	0.9971276,1.280169	0.0721369	1.09614	0.7804521,1.411838	0.57088	1.21756	1.0710959,1.364020	0.00843186	1.26332	1.0649000,1.461747	0.0244693	1.35523	1.1006715,1.609788	0.0227211	169.914	1.11207e-12	0.0721369	0.114216	63
Free cholesterol to total lipids ratio in large VLDL	ebi-a-GCST90092873	Atrial fibrillation and flutter	1.31176	1.1235802,1.499938	0.00470632	0.874844	0.5304038,1.219284	0.45099	1.13893	0.9444847,1.333369	0.189761	1.06044	0.8471937,1.273693	0.592459	1.55519	1.1778146,1.932558	0.0270135	119.682	2.17204e-09	0.00470632	0.313791	44
Free cholesterol to total lipids ratio in very large VLDL	ebi-a-GCST90093021	Atrial fibrillation and flutter	1.24294	1.0730910,1.412795	0.012086	1.15178	0.8249233,1.478641	0.400675	1.23882	1.0787734,1.398863	0.00872365	1.19111	1.0089608,1.373269	0.0654608	1.46811	1.1459422,1.790276	0.0234586	165.969	7.89184e-14	0.012086	0.239471	53
Free cholesterol to total lipids ratio in chylomicrons and extremely large VLDL	ebi-a-GCST90093045	Atrial fibrillation and flutter	1.35177	1.109001,1.594532	0.0149538	1.45608	1.169684,1.742471	0.0182138	1.31766	1.123770,1.511554	0.00529399	1.43938	1.278211,1.600555	0.000258044	1.69296	1.307820,2.078093	0.0148368	80.1363	3.72228e-09	0.0149538	0.163207	22
Free cholesterol levels in very small VLDL	ebi-a-GCST90093032	Atrial fibrillation and flutter	1.15635	1.0441465,1.268549	0.0111614	0.916254	0.6499485,1.182560	0.522488	1.09079	0.9677118,1.213869	0.166388	1.0788	0.9627818,1.194815	0.205534	1.14066	0.9576033,1.323722	0.164637	112.282	5.66268e-06	0.0111614	0.85309	56
Phospholipids to total lipids ratio in medium VLDL	ebi-a-GCST90092925	Atrial fibrillation and flutter	1.17513	1.0304915,1.319760	0.0287525	1.00558	0.7718597,1.239294	0.96297	1.17273	1.0392342,1.306216	0.0193153	1.20086	1.0742667,1.327450	0.00641736	1.26805	1.0137780,1.522317	0.0726856	164.439	7.68223e-13	0.0287525	0.477813	57
Phospholipids to total lipids ratio in chylomicrons and extremely large VLDL	ebi-a-GCST90093049	Atrial fibrillation and flutter	1.17359	1.0335201,1.313667	0.0251033	1.12022	0.8230413,1.417396	0.45902	1.12292	0.9743509,1.271492	0.126155	1.148	1.0193836,1.276626	0.042697	1.24053	0.9895249,1.491546	0.101527	81.9414	1.23913e-05	0.0251033	0.603332	37
Phospholipids in IDL	met-d-IDL_PL	Atrial fibrillation and flutter	1.1558	1.0275141,1.284077	0.0269518	1.21684	0.9750342,1.458644	0.117285	1.17583	1.0440517,1.307617	0.0159922	1.18134	1.0613144,1.301366	0.00864755	1.26182	1.0496818,1.473959	0.0360818	126.94	1.99645e-07	0.0269518	0.313159	58
Triglycerides to total lipids ratio in medium VLDL	ebi-a-GCST90092927	Atrial fibrillation and flutter	0.905296	0.7632543,1.047338	0.169789	1.02224	0.6977218,1.346753	0.894704	0.940775	0.7895178,1.092032	0.428882	0.867014	0.5915272,1.142500	0.313473	0.800611	0.5578848,1.043337	0.0769194	205.033	3.51982e-15	0.169789	0.226054	73
Triglycerides to total lipids ratio in small VLDL	ebi-a-GCST90092979	Atrial fibrillation and flutter	0.884709	0.7487644,1.020653	0.0773761	1.03659	0.7605595,1.312619	0.799481	0.99359	0.8404004,1.146779	0.934422	0.945949	0.7042879,1.187611	0.653878	0.87732	0.6467796,1.107861	0.270414	155.326	1.32692e-10	0.0773761	0.92964	63
Triglycerides to total lipids ratio in large VLDL	ebi-a-GCST90092879	Atrial fibrillation and flutter	0.83018	0.6985056,0.9618552	0.0056003	1.0327	0.7387097,1.3266879	0.831076	0.936768	0.8112048,1.0623320	0.307915	0.946163	0.8272911,1.0650352	0.366179	0.88879	0.6777051,1.0998743	0.279349	120.093	2.54917e-08	0.0056003	0.420787	49
Triglycerides to total lipids ratio in very large VLDL	ebi-a-GCST90093027	Atrial fibrillation and flutter	0.804843	0.6561540,0.9535327	0.00421138	0.844838	0.4983315,1.1913443	0.344804	0.779675	0.6099888,0.9493604	0.00404363	0.774643	0.5165258,1.0327600	0.0581538	0.688302	0.4149691,0.9616351	0.0100386	127.329	1.12494e-08	0.00421138	0.188871	52
Triglycerides in chylomicrons and extremely large VLDL	met-d-XXL_VLDL_TG	Atrial fibrillation and flutter	0.929861	0.7827168,1.077006	0.332723	1.05529	0.7222001,1.388390	0.752723	0.938606	0.7779886,1.099224	0.439425	0.782105	0.4473998,1.116810	0.155978	0.849992	0.6197287,1.080255	0.17244	151.487	2.02485e-11	0.332723	0.32486	57
Ratio of monounsaturated fatty acids to total fatty acids	ebi-a-GCST90092929	Atrial fibrillation and flutter	0.984343	0.8576929,1.110993	0.807059	1.0406	0.7793049,1.301903	0.766389	0.939264	0.8103960,1.068132	0.340591	0.949583	0.8299285,1.069238	0.400382	0.912211	0.7199586,1.104463	0.35298	146.688	4.66936e-10	0.807059	0.307134	61
Average diameter for VLDL particles	ebi-a-GCST90093002	Atrial fibrillation and flutter	0.928544	0.8091904,1.047897	0.223422	1.05321	0.7814511,1.324978	0.709714	0.960784	0.8254523,1.096115	0.562315	1.02921	0.8780271,1.180398	0.710187	0.956834	0.7642953,1.149372	0.65486	154.884	1.06013e-09	0.223422	0.697127	69
Concentration of IDL particles	ebi-a-GCST90092838	Atrial fibrillation and flutter	1.19949	1.0502083,1.348771	0.0169302	0.993325	0.7384300,1.248220	0.959167	1.16566	1.0223620,1.308960	0.0360263	1.17977	1.0287263,1.330809	0.0376224	1.21767	0.9580273,1.477316	0.144573	108.497	1.41083e-07	0.0169302	0.889634	45
Concentration of very small VLDL particles	ebi-a-GCST90093035	Atrial fibrillation and flutter	1.16105	1.0527634,1.269343	0.00687655	0.961618	0.7082444,1.214992	0.7632	1.09064	0.9648701,1.216417	0.176326	1.07661	0.9609490,1.192266	0.216172	1.14832	0.9735157,1.323115	0.126712	109.965	2.24248e-05	0.00687655	0.874683	57
Total lipids in chylomicrons and extremely large VLDL	met-d-XXL_VLDL_L	Atrial fibrillation and flutter	0.961282	0.8273253,1.095239	0.563427	1.17067	0.8410926,1.500242	0.352463	1.01249	0.8558987,1.169081	0.876534	1.06791	0.8143861,1.321435	0.613344	0.888367	0.6783665,1.098367	0.273736	153.362	4.05861e-10	0.563427	0.342739	64

## Sheet: TableS7
Table S7. Value of F statistic for each instrument of exposure that were causally associated with AF and flutter according to the IVW method
Cholesterol to total lipids ratio in small VLDL		Cholesterol to total lipids ratio in very large VLDL		Cholesterol levels in very small VLDL		Cholesteryl esters to total lipids ratio in small VLDL		Cholesteryl esters to total lipids ratio in very large VLDL		Cholesteryl esters in very small VLDL		Free cholesterol to total lipids ratio in large VLDL		Free cholesterol to total lipids ratio in very large VLDL		Free cholesterol to total lipids ratio in chylomicrons and extremely large VLDL		Free cholesterol levels in very small VLDL		Phospholipids to total lipids ratio in medium VLDL		Phospholipids to total lipids ratio in chylomicrons and extremely large VLDL		Phospholipids in IDL		Triglycerides to total lipids ratio in large VLDL		Triglycerides to total lipids ratio in very large VLDL		Concentration of IDL particles		Concentration of very small VLDL particles
SNP	F	SNP	F	SNP	F	SNP	F	SNP	F	SNP	F	SNP	F	SNP	F	SNP	F	SNP	F	SNP	F	SNP	F	SNP	F	SNP	F	SNP	F	SNP	F	SNP	F
rs11971790	30.0119	rs74515649	30.0411	rs13010903	29.9398	rs28454618	29.8861	rs13287131	29.8096	rs4738679	27.5991	rs2229357	31.9628	rs2518134	31.3909	rs117857195	32.6939	rs117911817	29.8343	rs310631	29.8444	rs6078	29.753	rs12056034	28.8891	rs77879697	30.0683	rs8103923	30.2321	rs6920309	30.1578	rs12620918	30.1743
rs704	30.4543	rs472495	30.1369	rs80017394	30.2343	rs7836397	30.2832	rs10773049	29.9122	rs13010903	29.5497	rs79225634	32.539	rs2294922	32.0256	rs144018203	37.1745	rs13076933	30.139	rs28929474	30.2663	rs10899106	31.0328	rs2326077	29.0092	rs12899324	30.3412	rs849327	33.6414	rs1293261	31.0942	rs11096640	30.3033
rs735169	30.4928	rs10020067	30.3559	rs146407081	30.4274	rs1899951	30.7253	rs116009877	30.6397	rs1635852	29.582	rs5998509	34.5531	rs2618566	32.3205	rs885683	37.1844	rs2539980	30.3691	rs10787429	32.2701	rs13108218	31.2391	rs10176901	29.3564	rs148608463	30.3629	rs310631	33.7005	rs2618566	33.1033	rs2486681	30.4903
rs28454618	31.8994	rs7707394	30.3849	rs1500188	30.4363	rs6583899	30.9326	rs2084152	30.6474	rs2539980	29.7984	rs150224153	34.7211	rs76895963	32.5077	rs10274367	37.6709	rs112103450	31.189	rs77303550	33.2297	rs2103827	32.0733	rs6016505	29.5772	rs115785198	32.5363	rs2294922	33.8896	rs77303550	35.0822	rs10881987	30.6249
rs12212146	32.3315	rs1716183	30.3983	rs2539980	30.4498	rs15922	31.1814	rs6606725	30.9036	rs2141247	29.9924	rs2066718	35.3622	rs11601507	32.764	rs40270	42.9378	rs1293261	31.6227	rs40270	33.5023	rs2304969	32.694	rs35135293	30.4623	rs2073547	32.7152	rs2302263	34.3913	rs496654	35.668	rs75911530	30.7038
rs1436424	32.8271	rs12179053	30.406	rs2141247	31.8491	rs11971790	31.4125	rs144033177	31.1439	rs1500188	31.5987	rs2223745	36.9191	rs693668	33.4775	rs1260326	52.9068	rs55649657	31.847	rs57994353	33.6559	rs4986970	34.7813	rs2820232	30.9708	rs11601507	32.8416	rs12426505	34.4132	rs1499279	36.9634	rs1540037	30.8083
rs310631	33.5611	rs12419462	30.567	rs4738679	31.9472	rs117738782	32.3451	rs10020067	31.5392	rs496654	33.7909	rs77725792	37.8609	rs111351217	34.5719	rs964184	53.4734	rs11096640	32.1525	rs2642438	34.5359	rs7012637	35.6062	rs2737245	32.2741	rs6912327	33.1805	rs1885659	35.7365	rs2517671	38.0374	rs55649657	31.4955
rs116009877	34.9277	rs6938550	30.5828	rs72843670	32.6823	rs2073547	32.4849	rs1899951	31.6775	rs1293261	34.3782	rs12923787	39.1425	rs11075253	35.6112	rs146534110	55.2924	rs2523675	32.4314	rs11688682	34.798	rs73390208	36.9833	rs80017394	32.8599	rs11550299	34.555	rs11688682	35.9712	rs149615216	38.0935	rs3782257	32.3516
rs11601507	35.0599	rs144033177	30.6873	rs1293261	33.4432	rs74747585	32.6035	rs1716183	32.0039	rs61791721	34.4581	rs9987289	39.3124	rs3802932	35.8307	rs60223219	56.5245	rs4666000	32.5415	rs6583899	35.4535	rs34417180	38.2227	rs10260606	32.9314	rs11206517	35.1803	rs57994353	36.2691	rs653178	38.1912	rs139974673	32.8802
rs1779820	35.8436	rs849327	30.9797	rs653178	33.6302	rs116734477	33.0798	rs12426505	32.2603	rs2618566	34.7285	rs904770	39.3732	rs7091593	36.1086	rs28601761	59.2018	rs3782257	34.6241	rs4307732	36.0892	rs4752973	38.7216	rs11601507	33.4121	rs11736932	35.993	rs12419237	36.8295	rs1057558	38.3705	rs2495477	33.333
rs6905288	35.9472	rs111351217	31.3892	rs9616847	33.9044	rs2156552	33.7729	rs74515649	32.3711	rs28743711	34.8459	rs1047964	40.472	rs144022883	36.1219	rs12179053	67.5212	rs146407081	35.0435	rs653178	37.7149	rs6078854	39.8665	rs2740488	33.7536	rs28478252	36.6173	rs693668	37.6085	rs12056034	38.5883	rs4812975	33.4413
rs11066120	36.8904	rs1899951	31.4801	rs2618566	34.8311	rs704	34.0159	rs77365023	33.1643	rs111278137	34.9033	rs1047964	40.472	rs9677933	36.3209	rs72999033	73.3553	rs74747585	36.1947	rs11601507	39.8219	rs3936510	40.028	rs6102034	34.2942	rs904770	38.2673	rs3809868	39.4957	rs10260606	38.7596	rs146407081	34.8581
rs11688682	37.051	rs8103923	32.2861	rs822928	35.9615	rs11736932	34.6827	rs8103923	33.3107	rs6102034	38.0454	rs3809868	40.611	rs2925979	37.4404	rs115478735	75.4833	rs2495477	36.624	rs2925979	42.0753	rs2297991	40.2849	rs1500188	34.6815	rs2223745	38.4126	rs1047964	39.6887	rs2792735	39.6346	rs11601507	35.2391
rs1037116	37.3718	rs77365023	32.4153	rs2792735	37.9556	rs11688682	34.8927	rs12179053	33.4972	rs72836561	38.1592	rs4631704	41.8715	rs144018203	37.7333	rs73307905	82.1533	rs10260606	37.6022	rs2244608	42.5117	rs112875651	41.3572	rs1293261	35.9887	rs2066718	38.6878	rs1047964	39.6887	rs2642438	41.6845	rs10260606	36.8409
rs4055121	38.0742	rs668459	33.7415	rs10260606	39.8067	rs11066120	35.0725	rs12419462	34.0998	rs653178	38.2946	rs2292318	43.0314	rs881817	37.839	rs738408	88.4751	rs9616847	38.9558	rs6905288	42.9777	rs9939678	46.7024	rs4860948	36.1775	rs1047964	42.4363	rs2618566	40.7632	rs11753995	42.7643	rs75003668	37.3518
rs6583899	39.4219	rs59036878	34.1056	rs6102034	40.1138	rs117310449	35.8059	rs11688682	34.7454	rs10260606	38.5692	rs3812595	43.2382	rs28807203	39.5302	rs5112	112.839	rs6602909	38.9842	rs74747585	43.7101	rs139915535	47.3421	rs7773004	37.3991	rs1047964	42.4363	rs7091593	40.8006	rs75003668	44.6303	rs2523675	37.5871
rs9687846	40.2785	rs13241165	35.667	rs11601507	40.5423	rs310631	36.3221	rs13241165	36.3191	rs11601507	39.6528	rs2738447	43.3192	rs10750766	39.6371	rs1801689	127.345	rs11601507	39.7193	rs261265	45.0488	rs144439590	47.6487	rs10822145	38.9126	rs3808351	42.6558	rs2925979	40.8059	rs72631343	45.7164	rs6602909	38.0052
rs11231721	41.1091	rs11688682	36.7743	rs7241918	42.2972	rs735169	36.562	rs12419237	37.3838	rs2737245	42.9334	rs921919	45.2776	rs7707394	40.8802	rs3127580	196.21	rs822928	40.2104	rs10750766	45.943	rs635634	49.3208	rs140798831	39.7386	rs28377109	42.8082	rs7707394	40.8477	rs1169294	46.3929	rs149615216	38.2022
rs686030	41.3606	rs12419237	37.8474	rs62115478	42.5101	rs72823013	36.8343	rs2800710	38.1477	rs10822145	44.3267	rs1215112	45.4955	rs6544713	41.3061	rs117733303	482.646	rs75003668	40.763	rs2517671	48.9699	rs1047964	52.2522	rs1461729	40.5301	rs4240624	43.2511	rs2229738	45.0208	rs6882345	54.5153	rs74747585	38.4726
rs2642438	41.5708	rs79598313	37.8515	rs4860948	43.6094	rs2618566	37.9806	rs632057	38.4475	rs4794048	44.453	rs4752973	47.0966	rs3185010	41.365	rs1077835	605.085	rs4738679	40.889	rs144018203	50.896	rs1047964	52.2522	rs7241918	41.6495	rs3785100	43.3683	rs146534110	50.8776	rs10822145	54.8604	rs822928	38.8898
rs158482	43.532	rs6855981	38.4508	rs61791721	45.821	rs2943634	39.0521	rs6855981	38.9156	rs140798831	48.0053	rs174576	48.0122	rs261265	45.1202	rs1532085	654.636	rs4860948	42.0866	rs190543502	52.1622	rs8178824	56.2228	rs2618566	43.5464	rs9302635	44.0231	rs72836561	55.564	rs2495477	56.8061	rs9616847	39.6756
rs74747585	44.3067	rs2800710	39.2793	rs2642438	46.0453	rs2943634	39.0521	rs11075253	39.228	rs12056034	48.0264	rs9304381	49.2342	rs498475	45.47	rs10455872	1208.47	rs77960347	42.775	rs693668	54.1073	rs4646272	56.4407	rs2792735	46.3764	rs1215112	46.5884	rs6073966	57.4028	rs12208357	60.4404	rs4860948	40.86
rs2925979	44.4877	rs57994353	39.3671	rs2495477	47.2604	rs2306363	39.269	rs79225634	39.6025	rs2792735	49.76	rs10692614	49.828	rs9302635	45.8252			rs1471251	44.8091	rs2618566	54.6653	rs1260326	66.3509	rs261274	46.767	rs117738782	46.8321	rs3936510	57.5799	rs4794048	61.9531	rs4738679	41.0672
rs3127580	45.1997	rs2302263	40.1674	rs4794048	47.3244	rs1037116	39.9996	rs2302263	40.4583	rs7241918	50.5658	rs117733303	50.5408	rs28929474	47.3086			rs4794048	51.0221	rs117733303	59.3623	rs4273010	70.2675	rs77303550	47.4375	rs3809868	47.2277	rs150844304	58.3146	rs111278137	66.1773	rs1471251	48.5
rs57994353	45.7292	rs11075253	40.9421	rs74747585	47.4058	rs11601507	40.6366	rs2618566	40.6425	rs72631343	51.3901	rs61805075	50.6563	rs3127580	50.3468			rs11753995	51.2958	rs3809868	60.0671	rs738408	73.3804	rs72836561	47.8377	rs17447211	49.2433	rs144018203	58.5286	rs1883711	69.3603	rs11206517	48.7265
rs3809868	47.5907	rs2618566	41.1501	rs75003668	50.0026	rs28929474	42.6905	rs1885659	41.6761	rs1801689	52.6932	rs72823013	52.6886	rs6905288	50.8423			rs11206517	52.2764	rs2972156	63.4719	rs3127580	108.381	rs72631343	47.9624	rs13702	49.8953	rs28807203	69.9694	rs11206517	69.7484	rs4794048	50.3468
rs2618566	47.9836	rs72647336	44.3222	rs11753995	50.0572	rs150844304	45.6508	rs79598313	41.8616	rs2495477	53.3162	rs77960347	55.8645	rs13179413	50.8868			rs72631343	53.3966	rs2569550	68.0035	rs174576	108.496	rs653178	49.418	rs28929474	51.0964	rs4336630	72.1914	rs2569550	70.3952	rs11753995	51.3414
rs10750766	51.534	rs1885659	45.1375	rs2737245	50.433	rs3809868	46.1439	rs57994353	42.1487	rs9302635	55.9189	rs13702	57.6184	rs77697917	53.5122			rs439523	57.2283	rs4722551	69.3642	rs55747707	121.737	rs2642438	51.1566	rs72823013	53.9191	rs12677504	73.289	rs8103315	83.6063	rs6078	51.4148
rs693668	59.769	rs7091593	46.2371	rs439523	52.251	rs174537	46.551	rs72647336	45.5249	rs2642438	57.3388	rs3127580	71.4309	rs40270	55.6823			rs869412	59.8924	rs34171564	74.4117	rs116843064	135.563	rs75003668	52.27	rs3747207	54.0561	rs4722551	73.6077	rs7707394	89.1951	rs72631343	52.2031
rs4336630	62.979	rs6073966	46.3119	rs72631343	53.0346	rs7952602	48.9183	rs7091593	45.5331	rs3798167	58.4533	rs77542162	86.3609	rs2954038	59.6345			rs2737245	62.2112	rs1561748	79.7617	rs4665710	195.047	rs496654	52.6905	rs2569550	54.539	rs79225634	80.6673	rs102275	117.653	rs28807203	57.3445
rs150966173	68.7122	rs79225634	49.7591	rs11206517	60.4043	rs693668	49.8731	rs2925979	52.8643	rs2738447	60.1419	rs112771035	95.3733	rs147711004	62.5007			rs2738447	63.0821	rs1561748	79.7617	rs15285	247.004	rs3798167	54.9012	rs13358429	56.8965	rs62188784	81.8605	rs633695	118.739	rs2738447	58.2728
rs2569550	70.4212	rs2229738	52.7395	rs140798831	61.7132	rs144018203	52.8545	rs2229738	54.3052	rs11206517	60.8127	rs112875651	101.846	rs2572431	71.2593			rs7707394	64.5689	rs3129774	83.2058	rs964184	398.675	rs56325564	57.1909	rs117733303	71.8297	rs10822168	82.5969	rs4299376	123.089	rs7707394	58.9025
rs2943634	72.2416	rs2925979	53.1744	rs12208357	62.0033	rs1561748	53.3489	rs146534110	57.099	rs4704834	71.0754	rs1801689	116.126	rs2972138	74.7511			rs4812975	73.0732	rs7707394	84.5483	rs56393506	413.205	rs67276129	57.9754	rs112875651	72.6263	rs3129774	87.3703	rs112875651	148.335	rs2737245	60.4205
rs2943634	72.2416	rs146534110	54.1766	rs9302635	62.2513	rs1561748	53.3489	rs28807203	66.7408	rs10282584	74.7114	rs7528419	117.425	rs602633	74.9177			rs9302635	75.9008	rs150966173	85.5782	rs3764261	608.543	rs10282584	59.2728	rs3127580	84.7444	rs3127580	96.8264	rs58542926	151.181	rs10275712	60.5014
rs7707394	73.7114	rs28807203	62.5325	rs2738447	62.7824	rs1779820	54.4506	rs1601935	67.5074	rs261274	81.6196	rs75911530	135.22	rs79225634	80.0668			rs34330586	76.0489	rs6544713	90.795	rs139953093	658.71	rs2738447	60.9404	rs112771035	88.696	rs147711004	97.6006	rs1081105	153.577	rs439523	61.08
rs4299376	84.3539	rs1047964	72.0372	rs77960347	69.9955	rs3812595	55.4225	rs3129774	69.0629	rs77960347	82.7779	rs11591147	139.849	rs3129774	90.3376			rs12208357	76.821	rs6073966	94.9361	rs1532085	893.696	rs111278137	61.5197	rs6073958	107.135	rs77542162	118.669	rs77542162	154.694	rs9302635	65.9818
rs3129774	87.6321	rs1047964	72.0372	rs10282584	71.6362	rs7707394	58.2686	rs34171564	69.6287	rs7707394	88.9863	rs12914626	147.46	rs77542162	108.518			rs1883711	80.302	rs7075901	107.09	rs1077835	911.158	rs1169292	66.2	rs7528419	131.219	rs934197	142.444	rs115478735	156.69	rs34330586	76.0297
rs3789849	90.7025	rs34171564	74.5704	rs4704834	81.5822	rs144439590	63.3266	rs77542162	73.8058	rs2393775	96.2822	rs118039278	182.885	rs115478735	121.632			rs60403635	83.8803	rs72836561	121.623			rs8103315	68.151	rs77542162	133.163	rs12740374	146.983	rs12916	196.041	rs1883711	80.551
rs190543502	94.3059	rs72836561	75.2559	rs7707394	82.4057	rs3127580	63.4429	rs147711004	75.2897	rs28807203	101.763	rs934197	195.949	rs1801689	122.748			rs118170342	84.639	rs1801689	123.398			rs77960347	68.7335	rs1801689	133.395	rs1801689	148.366	rs28807203	198.137	rs12208357	82.3228
rs144018203	96.0137	rs147711004	75.798	rs261274	85.9068	rs10468017	68.8324	rs72836561	77.0297	rs4299376	114.15	rs12151108	200.403	rs934197	131.779			rs10096633	85.847	rs147711004	130.394			rs472495	70.8765	rs75911530	133.435	rs115478735	180.534	rs261290	257.614	rs2393776	89.5108
rs4722551	97.2018	rs3129774	78.9705	rs118170342	94.8857	rs686030	69.3932	rs1047964	79.0253	rs8107974	119.801	rs115478735	212.978	rs12679834	146.359			rs2393776	92.6461	rs28807203	131.684			rs6882345	77.8517	rs429358	191.98	rs174537	200.177	rs183130	300.518	rs4665972	90.8424
rs1801689	108.523	rs481069	80.8027	rs2393775	95.5868	rs4722551	75.3027	rs1047964	79.0253	rs115478735	130.233	rs429358	341.366	rs117733303	169.91			rs261274	93.5717	rs780094	149.695			rs6073971	81.4448	rs11591147	220.055	rs1532085	211.342	rs562338	352.456	rs16939991	96.0297
rs1561748	124.062	rs11429307	82.1633	rs4299376	107.012	rs3789849	78.8531	rs481069	83.6972	rs112875651	155.002	rs6073958	439.007	rs11591147	200.81			rs115478735	110.701	rs13358429	152.15			rs7707394	98.5914	rs115478735	230.953	rs12679834	227.307	rs12740374	401.987	rs115478735	110.226
rs1561748	124.062	rs4722551	83.8136	rs115478735	129.042	rs2569550	79.0714	rs9687846	85.6397	rs77542162	183.521	rs7350789	446.111	rs73015021	233.543			rs4704834	111.225	rs115478735	193.353			rs4299376	124.699	rs934197	288.569	rs1077834	253.983	rs11591147	495.725	rs102274	111.189
rs72836561	129.975	rs77542162	84.2221	rs8107974	134.198	rs3129774	83.1366	rs1077834	86.8741	rs3843482	190.422			rs183130	262.043			rs77542162	150.753	rs77542162	193.5			rs58542926	129.076	rs12151108	296.759	rs11591147	261.42	rs12151108	652.878	rs4704834	111.593
rs3846662	130.829	rs150844304	86.4315	rs1057208	167.054	rs72836561	84.8841	rs4722551	90.7119	rs1057208	211.863			rs174537	266.903			rs8107974	157.444	rs10455872	202.805			rs115478735	132.497	rs10455872	307.096	rs12151108	269.83			rs10096633	114.171
rs117733303	132.453	rs13389219	88.2046	rs77542162	177.373	rs7082470	105.179	rs141820146	94.008	rs12740374	283.117			rs964184	268.777			rs12916	157.891	rs174537	228.616			rs112875651	144.828	rs12914626	408.118	rs34062580	299.927			rs77542162	141.825
rs147711004	158.78	rs10822168	93.0964	rs12916	180.552	rs3846662	108.187	rs150844304	94.593	rs102274	306.88			rs34062580	312.224			rs964184	160.146	rs581411	261.945			rs1081105	146.721	rs7350789	1134.01	rs117733303	308.361			rs8107974	146.588
rs934197	164.5	rs144018203	99.3153	rs112875651	201.727	rs75911530	115.684	rs13389219	94.9709	rs562338	377.342			rs139953093	362.23			rs102274	182.8	rs325	274.972			rs77542162	146.796	rs183130	2260.29	rs1260326	313.135			rs12916	148.179
rs28807203	169.298	rs1561748	107.322	rs102274	273.984	rs117733303	125.628	rs10822168	95.762	rs11591147	433.841			rs1260326	363.197			rs12740374	306.666	rs12740374	285.785			rs28807203	156.317			rs964184	346.241			rs964184	238.879
rs77542162	172.314	rs1561748	107.322	rs12740374	295.086	rs1801689	128.735	rs1515098	111.337	rs12151108	633.063			rs1532085	419.919			rs112875651	307.617	rs13229619	316.198			rs3843482	201.882			rs183130	519.398			rs12740374	293.783
rs174537	182.535	rs1515098	107.81	rs562338	389.92	rs12976395	147.77	rs144018203	111.932	rs633695	750.976			rs10455872	429.398			rs11591147	366.917	rs183130	338.611			rs102274	312.983			rs10455872	743.926			rs11591147	340.449
rs115478735	188.645	rs3127580	111.433	rs11591147	424.989	rs1260326	192.758	rs1561748	116.865	rs261290	1503.95			rs1077834	485.271			rs693	456.509	rs964184	350.596			rs12740374	448.367							rs112875651	360.399
rs1260326	276.384	rs12740374	119.831	rs12151108	624.378	rs77542162	195.209	rs1561748	116.865									rs73015024	557.916	rs11591147	439.556			rs11591147	466.473							rs693	450.802
rs12740374	315.262	rs1532085	123.267	rs633695	852.865	rs12679834	213.111	rs3127580	120.943									rs633695	1023.86	rs12151108	519.032			rs562338	474.02							rs73015024	528.258
rs10455872	363.647	rs4336630	125.567	rs261290	1692.9	rs115478735	216.683	rs12740374	128.308									rs261290	2013.78	rs1532085	612.714			rs633695	500.366							rs633695	1057.33
rs11591147	414.715	rs115478735	150.276			rs934197	219.691	rs4336630	137.03											rs1077834	667.512			rs12151108	661.383							rs261290	2084.31
rs3812316	447.595	rs1077834	152.506			rs12740374	295.029	rs115478735	149.004															rs261290	926.267
rs12679834	464.702	rs1801689	155.885			rs3812316	334.232	rs1801689	153.365
rs12151108	484.308	rs73015020	164.675			rs10455872	372.94	rs116843064	157.695
rs964184	678.259	rs11591147	192.475			rs11591147	394.828	rs11591147	177.821
rs183130	722.127	rs183130	227.586			rs964184	398.442	rs183130	203.051
		rs174537	235.726			rs12151108	475.049	rs174554	213.386
		rs34062580	353.708			rs183130	1848.04	rs34062580	339.383
		rs1260326	368.374					rs1260326	343.484
		rs328	421.48					rs117733303	468.636
		rs117733303	422.948					rs328	476.979
		rs964184	586.857					rs964184	640.626
		rs10455872	941.868					rs10455872	1025.17
